# Supplementary material for: Cathepsin S (CTSS) in IgA nephropathy: an exploratory study on its role as a potential diagnostic biomarker and therapeutic target
Source: Front Immunol. 2024 Jun 24;15:1390821. doi: 10.3389/fimmu.2024.1390821 (PMC11229174; doi:10.3389/fimmu.2024.1390821)
Supplement: Supplementary file 2 [file Table_1.xlsx]

## Sheet: Supplementary table 1
Supplementary table 1: Characteristics of SNPs serving as IVs.
Exposure	SNP	Chr	Pos	Pval	Beta	Se	Effect_allele	Other_allele	Eaf	R2	F
Cathepsin B	rs1065853	19	45413233	1e-06	0.2266	0.0463	T	G	0.07778	0.00720398	23.9384
	rs113646963	2	204530789	2.95121e-06	0.1996	0.0427	T	C	0.09708	0.00657589	21.8375
	rs11563944	7	89816334	3.54813e-06	0.1291	0.0278	G	A	0.26799	0.00649067	21.5526
	rs117345475	11	131588071	3.46737e-06	-0.4332	0.0933	G	A	0.02062	0.00648845	21.5452
	rs117486267	15	25484738	1.58489e-06	-0.4003	0.0834	C	T	0.02486	0.00693064	23.0237
	rs13152767	4	122367502	1.62181e-06	0.4158	0.0867	A	G	0.02617	0.00691942	22.9862
	rs143557119	11	116385842	4.7863e-06	0.4327	0.0946	A	G	0.02199	0.00629799	20.9088
	rs147881440	17	80969815	4.7863e-06	-0.2331	0.051	A	G	0.06428	0.00628867	20.8776
	rs148930853	8	114408661	3.01995e-06	0.5516	0.1181	C	T	0.01211	0.00656512	21.8015
	rs150370599	11	60718792	1.77828e-06	0.2183	0.0457	T	C	0.08341	0.00686496	22.804
	rs150811995	10	38633385	4.57088e-06	0.4603	0.1004	C	A	0.01878	0.00632721	21.0064
	rs1692819	8	11705448	5.24807e-54	0.4246	0.0274	A	G	0.29182	0.0678135	239.991
	rs200518932	3	151162527	2.63027e-06	-0.5167	0.11	A	C	0.01693	0.00663977	22.051
	rs200652433	18	73024506	7.24436e-07	0.3389	0.0684	T	C	0.04112	0.00738189	24.534
	rs36021960	7	47111670	3.01995e-06	0.1747	0.0374	A	G	0.12637	0.00656653	21.8062
	rs7249773	19	18289760	6.0256e-07	0.1749	0.0351	A	G	0.15121	0.00746561	24.8143
	rs72863882	10	134275165	6.45654e-08	-0.2569	0.0475	A	G	0.08353	0.00878343	29.2333
	rs75773690	1	24464363	4.16869e-06	-0.3945	0.0857	A	G	0.02192	0.00637834	21.1772
	rs76089522	3	140389189	2.88403e-06	-0.1971	0.0421	A	G	0.10475	0.00659613	21.9051
	rs9905973	17	26735142	3.54813e-07	-0.1405	0.0276	A	G	0.271	0.0077892	25.8983
Cathepsin E	rs10401027	17	6858240	2.23872e-06	-0.1225	0.0259	A	G	0.45246	0.00673122	22.3568
	rs10900907	6	1448387	3.23594e-06	0.1188	0.0255	A	G	0.41707	0.00653222	21.6915
	rs112918835	8	109846123	3.71535e-06	0.7062	0.1526	T	C	0.00706	0.00644603	21.4034
	rs13089837	3	5094952	4.16869e-06	-0.1152	0.025	C	T	0.49848	0.00639138	21.2208
	rs149553686	2	197840502	3.89045e-06	0.2425	0.0525	C	T	0.06772	0.00642187	21.3227
	rs189009983	4	102582604	4.67735e-06	0.7055	0.1541	T	C	0.00831	0.00630949	20.9472
	rs1936839	10	129433747	1.99526e-06	0.1562	0.0329	C	G	0.16937	0.00678218	22.5272
	rs57135345	10	26671589	2.95121e-06	0.2535	0.0542	T	C	0.05697	0.00658329	21.8622
	rs57689619	4	189431921	2.81838e-06	-0.2078	0.0444	G	A	0.08618	0.00659185	21.8908
	rs74677283	11	19486084	6.76083e-07	0.4379	0.0882	T	C	0.02151	0.00741201	24.6348
	rs8066936	17	754600	4.2658e-06	-0.1492	0.0325	A	G	0.1792	0.00634398	21.0624
Cathepsin F	rs10745925	12	102218899	9.12011e-27	-0.2874	0.0268	C	T	0.29402	0.0336656	114.932
	rs112526544	7	26300072	6.91831e-07	0.3801	0.0766	G	A	0.02831	0.00740398	24.6079
	rs115901379	2	106335628	3.38844e-06	0.4306	0.0927	G	T	0.02042	0.00649402	21.5638
	rs1260326	2	27730940	6.91831e-11	-0.1642	0.0252	C	T	0.59849	0.0126984	42.4309
	rs143015877	13	23327148	3.98107e-06	-0.1325	0.0287	T	C	0.25734	0.00641545	21.3012
	rs1791679	11	66337874	2.51189e-18	0.2349	0.0269	A	C	0.28947	0.0225786	76.2076
	rs183683891	6	133102456	3.01995e-06	-0.5242	0.1123	T	C	0.01536	0.0065574	21.7757
	rs186369051	5	93830000	2.63027e-06	-0.4818	0.1026	T	C	0.01504	0.00663593	22.0382
	rs61866943	10	85428041	9.12011e-07	0.4969	0.1012	G	T	0.01874	0.00725055	24.0943
	rs7564167	2	645190	4.89779e-07	-0.2649	0.0526	G	A	0.93594	0.0076247	25.3472
	rs9796775	16	9736917	2.45471e-06	-0.1172	0.0249	G	A	0.50502	0.00666663	22.1408
Cathepsin G	rs114418234	2	155060275	2.23872e-06	0.3077	0.065	C	A	0.03719	0.00674286	22.3957
	rs116142041	4	9787836	4.57088e-07	-0.3356	0.0665	A	G	0.03645	0.00765627	25.4529
	rs117133380	14	107206586	2.63027e-06	0.5002	0.1065	A	C	0.01556	0.0066382	22.0458
	rs147099093	3	37730576	1.38038e-06	0.4271	0.0885	A	G	0.02053	0.00700606	23.2761
	rs192289769	3	134273074	5.62341e-07	-0.5468	0.1093	G	C	0.01364	0.00752473	25.0123
	rs35241999	12	11184504	2.95121e-06	0.4059	0.0869	G	A	0.02374	0.00656587	21.804
	rs4702448	5	7295725	1.44544e-06	0.1275	0.0265	A	C	0.66583	0.00696383	23.1348
	rs497459	7	49838522	1.94984e-06	-0.1752	0.0368	C	T	0.86534	0.00681954	22.6521
	rs56284011	17	43079322	1.7378e-06	-0.3136	0.0656	C	G	0.03943	0.00687547	22.8392
	rs62493038	8	12993071	2.88403e-06	-0.3391	0.0725	T	C	0.03503	0.00658363	21.8633
	rs72773561	10	9677794	1.69824e-06	-0.2529	0.0528	C	T	0.05703	0.00690202	22.928
	rs77893942	8	69507645	8.70964e-07	-0.376	0.0764	A	T	0.03128	0.00728398	24.2062
Cathepsin H	rs12911554	15	51542757	1.8197e-06	-0.1198	0.0251	T	C	0.55027	0.00685384	22.7669
	rs146037740	18	11507434	3.46737e-07	0.4736	0.0929	A	G	0.02292	0.00781161	25.9734
	rs147991203	4	140256765	1.1749e-06	0.3758	0.0773	T	C	0.02671	0.00710903	23.6206
	rs34843303	15	79234470	1e-200	-1.1194	0.0344	C	T	0.11403	0.242872	1058.26
	rs35628511	1	24667702	4.16869e-06	-0.1253	0.0272	T	C	0.3116	0.00638757	21.2081
	rs508807	7	152771726	2.39883e-06	-0.1511	0.032	C	G	0.81025	0.00670903	22.2826
	rs60018174	16	5452751	7.24436e-07	0.1956	0.0395	T	C	0.1159	0.00737367	24.5064
	rs62013235	15	79246166	1.34896e-20	0.402	0.0432	A	G	0.091	0.0255619	86.5409
	rs62474230	8	3347249	2.69153e-06	-0.2377	0.0506	C	G	0.06195	0.00664077	22.0543
	rs74342103	19	36003934	3.46737e-06	0.3766	0.0812	T	A	0.02583	0.00647414	21.4974
	rs77977134	11	81603149	3.01995e-06	-0.2721	0.0583	C	T	0.0493	0.00655568	21.7699
Cathepsin O	rs10902420	12	132150183	1.23027e-06	-0.2097	0.0432	G	A	0.89909	0.00708753	23.5487
	rs146963690	2	156493388	2.29087e-06	0.6246	0.1322	G	T	0.0101	0.0067169	22.3089
	rs149159018	3	132077351	1.54882e-07	0.7034	0.134	G	A	0.01105	0.00827827	27.538
	rs17288007	4	159878046	2.45471e-06	-0.2456	0.0521	G	A	0.06381	0.00668686	22.2084
	rs181844705	5	75333560	1.09648e-06	0.4412	0.0905	G	A	0.02318	0.00714846	23.7526
	rs1870736	15	88624621	9.33254e-07	0.1222	0.0249	G	C	0.42746	0.00724338	24.0702
	rs2439803	11	129083967	5.12861e-07	0.1763	0.0351	G	A	0.15304	0.0075847	25.2132
	rs4076941	11	11261567	2.13796e-06	-0.1245	0.0262	C	T	0.36872	0.00679407	22.567
	rs4297371	10	11249367	3.54813e-06	0.1453	0.0313	C	A	0.79306	0.00648591	21.5367
	rs4843804	16	88156187	3.46737e-06	-0.3124	0.0673	A	G	0.0336	0.00648516	21.5342
	rs7140599	14	39942467	1.1749e-06	-0.1219	0.0251	C	T	0.57698	0.00709451	23.572
	rs78943701	10	73736674	2.95121e-06	-0.479	0.1025	A	G	0.01536	0.00657225	21.8253
	rs9932172	16	7642591	1.7378e-06	0.1915	0.0401	T	C	0.10769	0.00686141	22.7922
Cathepsin S	rs1022239	13	65424046	3.71535e-06	0.1157	0.025	T	A	0.58887	0.00644662	21.4054
	rs10516855	4	90924478	2.95121e-06	-0.1969	0.0421	C	T	0.09552	0.00658284	21.8607
	rs1060435	11	68855595	2.75423e-07	-0.1291	0.0251	G	A	0.39793	0.00795047	26.4388
	rs113108135	5	166659513	1.69824e-06	0.2349	0.0491	C	G	0.06933	0.00688584	22.8739
	rs116623438	5	102689283	9.12011e-07	-0.43	0.0876	C	T	0.02023	0.00724644	24.0805
	rs118010753	21	18833920	3.46737e-06	0.5018	0.1081	C	T	0.01437	0.00648543	21.5351
	rs12804405	11	24422062	2.0893e-06	0.612	0.129	A	G	0.01019	0.00677215	22.4937
	rs13150189	4	181239467	3.46737e-07	0.1556	0.0306	A	G	0.21113	0.00777217	25.8412
	rs13196989	6	239373	2.5704e-06	-0.1758	0.0374	T	C	0.13099	0.00664893	22.0816
	rs13212873	6	143059208	3.54813e-06	0.5422	0.117	C	T	0.0116	0.00646376	21.4627
	rs13411643	2	60351132	5.01187e-07	0.1831	0.0364	C	T	0.13712	0.00760698	25.2878
	rs2470994	7	47430626	3.38844e-06	0.1304	0.0281	C	T	0.28088	0.00648146	21.5218
	rs41271951	1	150737220	7.07946e-94	-0.8605	0.0419	G	A	0.08349	0.113294	421.513
	rs4313886	18	74370742	3.89045e-06	0.1687	0.0365	C	T	0.13446	0.0064298	21.3492
	rs4581957	2	174866439	1.14815e-06	-0.1775	0.0365	A	G	0.13414	0.0071132	23.6346
	rs529565	9	136149500	7.76247e-07	-0.1315	0.0266	C	T	0.31269	0.00734919	24.4245
	rs61870690	10	127523966	7.24436e-07	-0.3386	0.0684	G	A	0.04143	0.00736892	24.4905
	rs6657328	1	107433954	4.89779e-06	-0.1291	0.0283	C	G	0.7184	0.00626476	20.7978
	rs73099998	12	58633987	2.18776e-06	-0.146	0.0308	T	C	0.20811	0.00676102	22.4564
	rs74804137	12	18017954	1.58489e-07	-0.5178	0.0987	C	T	0.01757	0.00826872	27.5059
	rs7614425	3	98174258	1.8197e-06	-0.2082	0.0436	A	G	0.09254	0.00686046	22.789
	rs77792819	12	94386245	1.94984e-06	0.3147	0.0661	G	A	0.04096	0.00681982	22.6531
	rs78767885	19	18112020	2.69153e-06	0.2238	0.0477	C	T	0.08725	0.00662447	21.9999
	rs989576	4	127182592	2.5704e-06	0.1307	0.0278	T	C	0.29843	0.00665147	22.0901
Cathepsin L2	rs10817163	9	99902524	7.07946e-11	0.1983	0.0304	A	T	0.22045	0.012726	42.5241
	rs114113108	1	75257391	4.36516e-07	-0.5922	0.1172	C	G	0.0129	0.0076752	25.5163
	rs116407656	4	68099087	2.75423e-06	0.4014	0.0856	C	T	0.02439	0.00661726	21.9758
	rs117714361	12	109142132	4.89779e-06	-0.3452	0.0756	G	A	0.02685	0.00627651	20.837
	rs13068566	3	102862667	2.88403e-06	0.1157	0.0247	G	A	0.46617	0.00660313	21.9285
	rs148608463	12	121413027	4.57088e-06	-0.1178	0.0257	A	G	0.35415	0.00632446	20.9972
	rs151179824	3	173226009	2.34423e-06	0.4449	0.0943	A	G	0.02158	0.00669788	22.2453
	rs1523319	3	2292279	3.54813e-06	-0.1292	0.0279	G	C	0.28541	0.00645444	21.4315
	rs2302837	17	6014176	3.31131e-07	-0.2541	0.0498	G	A	0.92494	0.00782516	26.0188
	rs34635662	7	27220271	3.89045e-06	0.2286	0.0495	T	C	0.07724	0.00641948	21.3147
	rs7898416	10	83700161	3.23594e-06	-0.2277	0.0489	G	A	0.0705	0.00652559	21.6693
Cathepsin Z	rs10745925	12	102218899	2.29087e-42	-0.3624	0.0266	C	T	0.29402	0.0532365	185.503
	rs10761760	10	65179152	3.0903e-07	0.1321	0.0258	C	A	0.44944	0.00787926	26.2001
	rs1135945	4	516586	4.16869e-06	0.1385	0.0301	A	G	0.20839	0.00637301	21.1594
	rs114675081	3	106826623	1.65959e-06	0.5153	0.1075	G	A	0.01467	0.00691266	22.9636
	rs116920068	10	54555095	3.01995e-06	-0.3498	0.0749	A	G	0.0289	0.00656403	21.7978
	rs148201372	3	32683740	1.04713e-06	-0.5187	0.1063	T	A	0.01546	0.00716142	23.7959
	rs148370779	20	57602212	2.5704e-57	-1.7632	0.1105	T	C	0.01316	0.0716084	254.458
	rs298724	9	94023321	3.98107e-06	0.2482	0.0538	C	T	0.05507	0.00640623	21.2704
	rs36128387	1	235460258	1.54882e-06	0.439	0.0914	T	C	0.02261	0.00694011	23.0554
	rs4761709	12	93785170	1e-06	0.1218	0.0249	G	A	0.40882	0.00719637	23.9129
	rs67845377	19	19275802	3.71535e-06	0.1675	0.0362	T	C	0.13855	0.00644406	21.3968
	rs7656806	4	138271322	1.86209e-07	-0.1276	0.0245	C	A	0.51592	0.00815022	27.1085
	rs770140	5	19430825	2.81838e-06	-0.1241	0.0265	G	A	0.64195	0.0065998	21.9174
IgA nephropathy	rs10788166	10	123046542	1.228e-06	0.0673	0.0139	G	A	0.239539	4.90623e-05	23.4422
	rs11171879	12	56898557	1.714e-06	0.0591	0.0124	A	T	0.65709	4.75422e-05	22.7159
	rs112609825	6	24510455	1.22301e-06	-0.1755	0.0362	C	T	0.0225861	4.91908e-05	23.5036
	rs11971828	7	29188870	2.78901e-07	0.0618	0.012	A	G	0.352051	5.55084e-05	26.5224
	rs140069999	2	227810775	5.292e-09	-0.2748	0.0471	A	G	0.0496837	7.12409e-05	34.04
	rs143129886	16	54905618	3.155e-06	-0.3128	0.0671	C	T	0.0135229	4.54817e-05	21.7313
	rs145091230	1	98905679	1.70498e-06	0.3303	0.069	C	T	0.00645182	4.79586e-05	22.9149
	rs1606888	15	71605453	2.49402e-08	0.0861	0.0154	G	A	0.846015	6.54191e-05	31.2581
	rs17184837	8	99160408	7.28803e-07	0.1756	0.0354	T	G	0.0284452	5.14978e-05	24.606
	rs1927355	13	111067993	1.28499e-07	0.0624	0.0118	T	C	0.393503	5.85259e-05	27.9643
	rs2058367	4	82275064	6.36605e-08	0.0643	0.0119	C	T	0.399182	6.1104e-05	29.1962
	rs2524075	6	31243859	7.27947e-16	-0.1067	0.0132	T	C	0.267453	0.000136738	65.34
	rs2885134	1	13921934	2.73602e-09	0.2128	0.0358	G	A	0.0243264	7.39458e-05	35.3326
	rs4434650	8	120163725	1.892e-07	0.0882	0.0169	T	C	0.102642	5.70043e-05	27.2372
	rs519662	11	121581419	7.31392e-09	-0.0822	0.0142	C	T	0.782075	7.01302e-05	33.5093
	rs557445	12	69974705	1.366e-06	-0.0562	0.0116	G	A	0.555464	4.91251e-05	23.4723
	rs559124201	21	30133935	3.29701e-06	6.3567	1.3666	T	C	0.0116022	4.52824e-05	21.6361
	rs56254331	19	41826020	2.09701e-16	-0.1281	0.0156	C	A	0.184425	0.000141109	67.4291
	rs562598618	2	160976441	1.46599e-06	-0.2296	0.0477	A	G	0.0144969	4.84902e-05	23.1689
	rs60622800	5	1309904	1.66498e-06	0.0571	0.0119	A	G	0.66664	4.81865e-05	23.0238
	rs6700241	1	161500975	5.36995e-08	0.0799	0.0147	G	A	0.188639	6.18302e-05	29.5432
	rs72844539	17	73098229	1.40301e-06	0.1782	0.0369	A	G	0.0255884	4.88101e-05	23.3217
	rs7597716	2	228179901	5.27995e-08	0.071	0.013	T	C	0.707537	6.24268e-05	29.8283
	rs76103846	4	66131463	2.28602e-06	0.1404	0.0297	T	A	0.0499617	4.67702e-05	22.347
	rs77837771	8	22984598	1.93001e-06	0.1087	0.0228	G	C	0.132024	4.75704e-05	22.7294
	rs9266216	6	31325090	5.44628e-27	0.1292	0.012	T	C	0.685248	0.000242564	115.921
	rs948705	16	57349346	9.13398e-08	0.0882	0.0165	T	G	0.806965	5.98014e-05	28.5738

## Sheet: Supplementary table 2
Supplementary table 2: STROBE-MR checklist of recommended items to address in reports of Mendelian randomization studies1 2
Item No.	Section	Checklist item	Position	Relevant text from manuscript
1	TITLE and ABSTRACT	Indicate Mendelian randomization (MR) as the study’s design in the title and/or the abstract if that is a main purpose of the study	Abstract	We conducted a comprehensive bidirectional and multivariable Mendelian randomization (MR) study using publicly available genetic data to explore the causal association between cathepsins and IgAN systematically.
	INTRODUCTION
2	Background	Explain the scientific background and rationale for the reported study. What is the exposure? Is a potential causal relationship between exposure and outcome plausible? Justify why MR is a helpful method to address the study question	Introduction	Recent investigations have unveiled the crucial roles played by several cathepsins, such as cathepsin B, cathepsin D, cathepsin K, and cathepsin S (CTSS), in either promoting or suppressing various kidney diseases, including diabetic nephropathy, acute kidney injury, chronic kidney disease, and renal ischemia/reperfusion injury……..
3	Objectives	State specific objectives clearly, including pre-specified causal hypotheses (if any). State that MR is a method that, under specific assumptions, intends to estimate causal effects	Introduction	Mendelian randomization (MR) leverages genetic variants as instrumental variables (IVs) to infer causal relationships between exposure and outcome, utilizing data from genome-wide association studies (GWAS). In this study, we employed both univariable and multivariable MR methodologies to elucidate the causal effects of various cathepsins on the risk of IgAN.
	METHODS
4	Study design and data sources	Present key elements of the study design early in the article. Consider including a table listing sources of data for all phases of the study. For each data source contributing to the analysis, describe the following:
	a)	Setting: Describe the study design and the underlying population, if possible. Describe the setting, locations, and relevant dates, including periods of recruitment, exposure, follow-up, and data collection, when available.	Materials and Methods: 2.1	We collected genetic instruments evaluating the levels of various cathepsins (µg/L) from the INTERVAL study…..
				We sourced GWAS data for IgAN from the UK Biobank and FinnGen dataset…….
	b)	Participants: Give the eligibility criteria, and the sources and methods of selection of participants. Report the sample size, and whether any power or sample size calculations were carried out prior to the main analysis	Materials and Methods: 2.1	We collected genetic instruments evaluating the levels of various cathepsins (µg/L) from the INTERVAL study, which consisted of 3,301 participants of European descent …..
	c)	Describe measurement, quality control and selection of genetic variants	Materials and Methods: 2.1	This analysis involved a substantial cohort of 477,784 individuals of European ancestry, comprising 15,587 cases and 462,197 controls.
	d)	For each exposure, outcome, and other relevant variables, describe methods of assessment and diagnostic criteria for diseases	Materials and Methods: 2.1	After stringent quality control and imputation procedures(13), we analyzed approximately 25 million genetic variants.
	e)	Provide details of ethics committee approval and participant informed consent, if relevant	Materials and Methods: 2.1	all participants provided informed consent. Audiences can access summary data at https://gwas.mrcieu.ac.uk.
5	Assumptions	Explicitly state the three core IV assumptions for the main analysis (relevance, independence and exclusion restriction) as well assumptions for any additional or sensitivity analysis	Materials and Methods: 2.2	The validity of IVs relies on satisfying three fundamental assumptions(11): 1. They must exhibit a direct correlation with the exposure of interest. 2. They should not correlate with potential confounding factors between the exposure and outcome. 3. They should not influence the outcome through pathways other than exposure.
6	Statistical methods: main analysis	Describe statistical methods and statistics used
	a)	Describe how quantitative variables were handled in the analyses (i.e., scale, units, model)	Materials and Methods: 2.3	We primarily utilized the Inverse Variance Weighting (IVW) method to estimate the overall effect size. To validate the robustness of our MR results, we also employed two complementary methods: MR-Egger and Weighted Median (WM).
	b)	Describe how genetic variants were handled in the analyses and, if applicable, how their weights were selected	Materials and Methods: 2.2	we employed the following criteria for IV selection(14): 1. We selected single nucleotide polymorphisms (SNPs) that exhibited a genome-wide significance level association with the exposure (P<5×10-6). 2. We excluded SNPs that displayed linkage disequilibrium within a 10,000 kb window (r2>0.001). 3. SNPs with an F-statistic of less than 10 were excluded. 4. We excluded SNPs significantly associate…
	c)	Describe the MR estimator (e.g. two-stage least squares, Wald ratio) and related statistics. Detail the included covariates and, in case of two-sample MR, whether the same covariate set was used for adjustment in the two samples	Materials and Methods: 2.3	To assess the heterogeneity among the selected IVs, we applied Cochran's Q statistic and illustrated the heterogeneity using a random effect model(11). Additionally, we used MR-Egger to investigate potential asymmetry due to the pleiotropic effects of multiple genetic variants, aiming to exclude the influence of horizontal pleiotropy(16).
				To refine our analysis further, we employed the MR-PRESSO method to identify and eliminate potential horizontal pleiotropic outliers that could significantly impact the estimation results
	d)	Explain how missing data were addressed	Not available	Not available
	e)	If applicable, indicate how multiple testing was addressed	Not available	Not available
7	Assessment of assumptions	Describe any methods or prior knowledge used to assess the assumptions or justify their validity	Materials and Methods: 2.2	To meet these three core assumptions, we employed the following criteria for IV selection(14): 1. We selected single nucleotide polymorphisms (SNPs) that exhibited a genome-wide significance level association with the exposure (P<5×10-6). 2. We excluded SNPs that displayed linkage disequilibrium within a 10,000 kb window (r2>0.001). 3. SNPs with an F-statistic of less than 10 were excluded. 4. We…
8	Sensitivity analyses and additional analyses	Describe any sensitivity analyses or additional analyses performed (e.g. comparison of effect estimates from different approaches, independent replication, bias analytic techniques, validation of instruments, simulations)	Materials and Methods: 2.3	To assess the heterogeneity among the selected IVs, we applied Cochran's Q statistic and illustrated the heterogeneity using a random effect model(11). Additionally, we used MR-Egger to investigate potential asymmetry due to the pleiotropic effects of multiple genetic variants, aiming to exclude the influence of horizontal pleiotropy(16).
9	Software and pre-registration
	a)	Name statistical software and package(s), including version and settings used	Materials and Methods: 2.3	These MR analyses were conducted using the 'Mendelian Randomization' package (version 0.4.3) within R software (version 4.3.1)(15).
	b)	State whether the study protocol and details were pre-registered (as well as when and where)	Not available	Not available
	RESULTS
10	Descriptive data
	a)	Report the numbers of individuals at each stage of included studies and reasons for exclusion. Consider use of a flow diagram	Results: 3.1	Figure 2
	b)	Report summary statistics for phenotypic exposure(s), outcome(s), and other relevant variables (e.g. means, SDs, proportions)	Supplementary table 1	Supplementary table 1
	c)	If the data sources include meta-analyses of previous studies, provide the assessments of heterogeneity across these studies	Not available	Not available
	d)	For two-sample MR:	i. Supplementary table 1	i. Supplementary table 1
		i. Provide justification of the similarity of the genetic variant-exposure associations between the exposure and outcome samples	ii. Results: 3.1	ii. Based on the information from the two data set sources, there is no sample overlap in the MR analysis of this study.
		ii. Provide information on the number of individuals who overlap between the exposure and outcome studies
11	Main results
	a)	Report the associations between genetic variant and exposure, and between genetic variant and outcome, preferably on an interpretable scale	Results: 3.1	Specifically, we observed that elevated levels of CTSS were associated with an increased risk of developing IgAN, with an odds ratio (OR) of 1.041 (95% CI=1.009–1.073, P=0.012) when utilizing the IVW method. Complementary tests, including WM and MR-Egger methods, supported this result, with WM yielding an OR of 1.054 (95% CI=1.007–1.103, P=0.025) and MR-Egger reporting an OR of 1.059 (95% CI=1.00…
	b)	Report MR estimates of the relationship between exposure and outcome, and the measures of uncertainty from the MR analysis, on an interpretable scale, such as odds ratio or relative risk per SD difference	Results: 3.1	Specifically, we observed that elevated levels of CTSS were associated with an increased risk of developing IgAN, with an odds ratio (OR) of 1.041 (95% CI=1.009–1.073, P=0.012) when utilizing the IVW method. Complementary tests, including WM and MR-Egger methods, supported this result, with WM yielding an OR of 1.054 (95% CI=1.007–1.103, P=0.025) and MR-Egger reporting an OR of 1.059 (95% CI=1.00…
	c)	If relevant, consider translating estimates of relative risk into absolute risk for a meaningful time period	Results: 3.1	Specifically, we observed that elevated levels of CTSS were associated with an increased risk of developing IgAN, with an odds ratio (OR) of 1.041 (95% CI=1.009–1.073, P=0.012) when utilizing the IVW method. Complementary tests, including WM and MR-Egger methods, supported this result, with WM yielding an OR of 1.054 (95% CI=1.007–1.103, P=0.025) and MR-Egger reporting an OR of 1.059 (95% CI=1.00…
	d)	Consider plots to visualize results (e.g. forest plot, scatterplot of associations between genetic variants and outcome versus between genetic variants and exposure)	Results: 3.1	Figure 2
12	Assessment of assumptions
	a)	Report the assessment of the validity of the assumptions	Results: 3.1	Specifically, we observed that elevated levels of CTSS were associated with an increased risk of developing IgAN, with an odds ratio (OR) of 1.041 (95% CI=1.009–1.073, P=0.012) when utilizing the IVW method. Complementary tests, including WM and MR-Egger methods, supported this result, with WM yielding an OR of 1.054 (95% CI=1.007–1.103, P=0.025) and MR-Egger reporting an OR of 1.059 (95% CI=1.00…
	b)	Report any additional statistics (e.g., assessments of heterogeneity across genetic variants, such as I2, Q statistic or E-value)	Results: 3.1	Importantly, our analysis revealed no evidence of heterogeneity in the results, as indicated by a non-significant Cochran's Q test (P=0.793). Furthermore, both the MR-Egger intercept (P=0.426) and the MR-PRESSO global tests (P=0.426) showed no signs of directional pleiotropy within these causal associations. However, it is crucial to note that we did not establish a causal relationship between ot…
13	Sensitivity analyses and additional analyses
	a)	Report any sensitivity analyses to assess the robustness of the main results to violations of the assumptions	Results: 3.1	Figure 2
	b)	Report results from other sensitivity analyses or additional analyses	Results: 3.1	Importantly, our analysis revealed no evidence of heterogeneity in the results, as indicated by a non-significant Cochran's Q test (P=0.793). Furthermore, both the MR-Egger intercept (P=0.426) and the MR-PRESSO global tests (P=0.426) showed no signs of directional pleiotropy within these causal associations. However, it is crucial to note that we did not establish a causal relationship between ot…
	c)	Report any assessment of direction of causal relationship (e.g., bidirectional MR)	Results: 3.1	To explore the possibility of reverse causality, specifically whether IgAN presence could induce changes in various cathepsin levels, reverse MR analyses were conducted. As demonstrated in Figure 3, our findings provided no evidence to support a causal relationship between IgAN and alterations in the levels of different cathepsins.
	d)	When relevant, report and compare with estimates from non-MR analyses	Not available	Not available
	e)	Consider additional plots to visualize results (e.g., leave-one-out analyses)	Figure 2	Figure 2
	DISCUSSION
14	Key results	Summarize key results with reference to study objectives	Discussion: Para 1	Extensive publicly available genetic data was explored in our study to systematically investigate the causal relationships between nine distinct cathepsins and the risk of IgAN. This study represents a groundbreaking MR analysis exploring the causal relationships between various cathepsins and IgAN. Through integrating results from both univariable and multivariable analyses, we have identified C…
15	Limitations	Discuss limitations of the study, taking into account the validity of the IV assumptions, other sources of potential bias, and imprecision. Discuss both direction and magnitude of any potential bias and any efforts to address them	Discussion: Para 13	However, it is crucial to acknowledge certain limitations in our study. First, the participants included are exclusively of European descent, which may limit the applicability of our findings to other ethnic groups.
16	Interpretation
	a)	Meaning: Give a cautious overall interpretation of results in the context of their limitations and in comparison with other studies	Discussion: Para 1	This study represents a groundbreaking MR analysis exploring the causal relationships between various cathepsins and IgAN. Through integrating results from both univariable and multivariable analyses, we have identified CTSS as a significant risk factor for IgAN, with no evidence of reverse causality for CTSS observed.
	b)	Mechanism: Discuss underlying biological mechanisms that could drive a potential causal relationship between the investigated exposure and the outcome, and whether the gene-environment equivalence assumption is reasonable. Use causal language carefully, clarifying that IV estimates may provide causal effects only under certain assumptions	Discussion: Para 4	The mechanism by which CTSS affects IgAN still requires deeper exploration. Studies have reported correlations between the expression of either HLA-DQB1 or HLA-DRB1 and the severity of IgAN(43-45). Cathepsin S plays a crucial role in processing the invariant chain/CD74 to facilitate MHC-II antigen presentation(46)…….
	c)	Clinical relevance: Discuss whether the results have clinical or public policy relevance, and to what extent they inform effect sizes of possible interventions	Discussion: Para 4	Recent research has also indicated that circulating CTSS levels correlate with GFR decline and levels of soluble tumor-necrosis-factor receptor (sTNFR) 1 and sTNFR2 in mice and humans, suggesting another potential pathway of influence(9).
17	Generalizability	Discuss the generalizability of the study results (a) to other populations, (b) across other exposure periods/timings, and (c) across other levels of exposure	Discussion: Para 13	However, it is crucial to acknowledge certain limitations in our study. First, the participants included are exclusively of European descent, which may limit the applicability of our findings to other ethnic groups.
	OTHER INFORMATION
18	Funding	Describe sources of funding and the role of funders in the present study and, if applicable, sources of funding for the databases and original study or studies on which the present study is based	Funding	This study was supported by grants provided by the National Natural Science Foundation of China (81974094 to ZX and 81700635 to YC), the Natural Science Foundation of Jilin Province (YDZJ202201ZYTS126 to HX, 20210101259JC to FM, 20210101455JC to MW).
19	Data and data sharing	Provide the data used to perform all analyses or report where and how the data can be accessed, and reference these sources in the article. Provide the statistical code needed to reproduce the results in the article, or report whether the code is publicly accessible and if so, where	Materials and Methods: 2.1	Audiences can access summary data at https://gwas.mrcieu.ac.uk. We sourced GWAS data for IgAN from the UK Biobank and FinnGen datasets
20	Conflicts of Interest	All authors should declare all potential conflicts of interest	Conflict of Interest	The authors declare that the research was conducted in the absence of any commercial or financial relationships that could be construed as a potential conflict of interest.
This checklist is copyrighted by the Equator Network under the Creative Commons Attribution 3.0 Unported (CC BY 3.0) license.
1	Skrivankova VW, Richmond RC, Woolf BAR, Yarmolinsky J, Davies NM, Swanson SA, et al. Strengthening the Reporting of Observational Studies in Epidemiology using Mendelian Randomization (STROBE-MR) Statement. JAMA. 2021;under review.
2	Skrivankova VW, Richmond RC, Woolf BAR, Davies NM, Swanson SA, VanderWeele TJ, et al. Strengthening the Reporting of Observational Studies in Epidemiology using Mendelian Randomisation (STROBE-MR): Explanation and Elaboration. BMJ. 2021;375:n2233.

## Sheet: Supplementary table 3
Supplementary table 3: Compounds contained in the FDA-approved & pharmacopeia drug library and their details.
ID	Name	Synonyms	CAS	SMILES	Formula	MolWt	Approved status	Pharmacopoeia	Disease	Pathways	Target	Receptor	Bioactivity	Reference
T26889	Borofalan	L-4-Boronophenylalanine	80994-59-8	O=C(O)[C@@H](N)CC1=CC=C(B(O)O)C=C1	C9H12BNO4	209.01	PMDA		Cancer	Others	Others	Others	Borofalan echibits antineoplastic effects. Borofalan can be used in studies on recurrent or locally advanced head and neck cancer.	Hirose K, et al. Boron neutron capture therapy using cyclotron-based epithermal neutron source and borofalan (10B) for recurrent or locally advanced head and neck cancer (JHN002): An open-label phase II trial. Radiother Oncol. 2021 Feb;155:182-187.
T16073	Micronomicin	Gentamicin C2b;Antibiotic XK-62-2;Sagamicin	52093-21-7	O[C@@H]1[C@@]([H])(OC[C@](C)([C@H]1NC)O)O[C@H]2[C@@H]([C@H]([C@@H](C[C@@H]2N)N)O[C@@]3(O[C@H](CC[C@@H]3N)CNC)[H])O	C20H41N5O7	463.57	NMPA; PMDA		Infection	Microbiology/virology	Antibacterial	Bacterial	Micronomicin is an antibiotic exhibiting antibacterial and bactericidal capacity.	Ohkoshi M, et al. Review [new antibiotics series III]: micronomicin (author's transl). Jpn J Antibiot. 1982 Mar;35(3):691-703.
T13231L	Trovafloxacin mesylate		147059-75-4	O=C1C(C=C2F)=C(N=C2N3C[C@@]4([H])[C@H](N)[C@@]4([H])C3)N(C=C1C(O)=O)C5=CC=C(F)C=C5F.CS(O)(=O)=O	C21H19F3N4O6S	512.46	FDA; EMA		Infection	DNA Damage/DNA Repair;Microbiology/virology;Cell Cycle/Checkpoint	Topoisomerase;Antibacterial;DNA/RNA Synthesis	panx1;Topo IV;Bacterial;DNA-gyrase	Trovafloxacin mesylate is an effective and selective inhibitor of pannexin 1 channel (PANX1, IC50 = 4 μM). Trovafloxacin mesylate exhibits potent activity against Gram-positive, Gram-negative, and anaerobic organisms. Trovafloxacin mesylate blocks the DNA gyrase and topoisomerase IV activity.	Poon IK, et al. Unexpected link between an antibiotic, pannexin channels and apoptosis. Nature. 2014 Mar 20;507(7492):329-34.
T33846	Oxyphenonium bromide	Atrenyl;Spasmophen;Oxifenon;Oxyfenon;Oxyphenon	50-10-2	CC[N+](C)(CC)CCOC(C(C1CCCCC1)(c1ccccc1)O)=O.[Br-]	C21H34BrNO3	428.4	NMPA		Digestive system	Others	Others	Others	Oxyphenonium bromide shows anticholinergic activity and can be used for research on the treatment of gastric and duodenal ulcers and for the relief of visceral spasms.	El-Gindy A, Emara S, Shaaban H. Stability-indicating method for determination of oxyphenonium bromide and its degradation product by high-performance liquid chromatography. J AOAC Int. 2007 Sep-Oct;90(5):1250-7.
T21445	Naphazoline	Naphazoline;Naphcon-a;AK-Con;All Clear;Clear Eyes	835-31-4	C(C1=NCCN1)c1cccc2ccccc12	C14H14N2	210.27	FDA; NMPA; PMDA		Cerebrovascular system; nervous system	GPCR/G Protein;Neuroscience	Adrenergic Receptor	α-adrenergic receptor	Naphazoline is a sympathomimetic compound with marked alpha adrenergic activity. Naphazoline can be used as a vasoconstrictor with a rapid action in reducing swelling when applied to mucous membrane.	Oliveira Tda C, et al. A batch injection analysis system with square-wave voltammetric detection for fast and simultaneous determination of naphazoline and zinc. Talanta. 2016 May 15;152:308-13.
TQ0221	Rufloxacin hydrochloride	MF-934 hydrochloride	106017-08-7	CN(CC1)CCN1c(c(F)c1)c2SCCN(C=C3C(O)=O)c2c1C3=O.Cl	C17H19ClFN3O3S	399.87	NMPA		Infection	Microbiology/virology	Antibacterial	Antibacterial	Rufloxacin hydrochloride is a fluoroquinolone antibacterial and inhibits topoisomerase. Rufloxacin hydrochloride inhibits B-cell differentiation in human mononuclear cells.	Catalfo A, et al. Rufloxacin induced photosensitization in bio-models of increasing complexity. Photochem Photobiol Sci. 2005 Mar;4(3):304-14.
T21740	RD162		915087-27-3	CNC(c(ccc(N(C1(CCC1)C(N1c(cc2)cc(C(F)(F)F)c2C#N)=O)C1=S)c1)c1F)=O	C22H16F4N4O2S	476.45	FDA; NMPA; PMDA; EMA		Endocrine system	Endocrinology/Hormones	Androgen Receptor	Androgen Receptor	RD162 is a non-steroidal antiandrogen (NSAA) specifically binding to the androgen receptor (AR).	Chris Tran, et al. Development of a second-generation antiandrogen for treatment of advanced prostate cancer. Science. 2009 May 8;324(5928):787-90.
T41284	Nalfurafine	TRK-820	152657-84-6	CN([C@H](CC[C@@]1([C@]23CCN(CC4CC4)[C@@H]1C1)O)[C@@H]3Oc3c2c1ccc3O)C(/C=C/c1cocc1)=O	C28H32N2O5	476.56	PMDA		nervous system	Endocrinology/Hormones;GPCR/G Protein;Neuroscience	Opioid Receptor	κ-opioid receptor	Nalfurafine is an effective and selective agonist of G protein-biased κ-opioid receptor with high translational potential. Nalfurafine enhances the therapeutic potential of MOR-targeting analgesics and can be used for uremic pruritis treatment studies.	Endoh T, et al. Potent antinociceptive effects of TRK-820, a novel kappa-opioid receptor agonist.Life Sci. 1999;65(16):1685-94.
T7722	Feprazone	DA-2370; DA 2370; DA2370; Prenazone	30748-29-9	CC(C)=CCC(C(N(c1ccccc1)N1c2ccccc2)=O)C1=O	C20H20N2O2	320.39	NMPA		infection	Others	Others	Others	Feprazone possesses anti-inflammatory and antiadipogenic properties. Feprazone can be used in studies about the treatment of joint and muscular pain.	Che L, et al. Feprazone Displays Antiadipogenesis and Antiobesity Capacities in in Vitro 3 T3-L1 Cells and in Vivo Mice. ACS Omega. 2021 Mar 7;6(10):6674-6680.
T20048	Vidarabine phosphate	Ara-AMP	29984-33-6	Nc1c2ncn([C@@H]([C@H]3O)O[C@H](COP(O)(O)=O)[C@H]3O)c2ncn1	C10H14N5O7P	347.22	NMPA		infection	Immunology/Inflammation	Antiviral	Antiviral	Vidarabine phosphate is an adenosine monophosphate analog. It is the monophosphate ester of VIDARABINE. It also has antiviral and possibly antineoplastic properties.	Song S, Hao Y, Yang X, Patra P, Chen J. Using Gold Nanoparticles as Delivery Vehicles for Targeted Delivery of Chemotherapy Drug Fludarabine Phosphate to Treat Hematological Cancers. J Nanosci Nanotechnol. 2016 Mar;16(3):2582-6. PubMed PMID: 27455673.
T21069	Lumateperone	ITI-007; ITI-722	313368-91-1	CN(CC1)c2cccc3c2N1[C@@H]1[C@H]3CN(CCCC(c(cc2)ccc2F)=O)CC1	C24H28FN3O	393.5	FDA		nervous system	GPCR/G Protein;Neuroscience	5-HT Receptor	5-HT Receptor	ITI-722 is a 5HT2A receptor antagonist and a dopamine receptor phosphoprotein modulator (DPPM).	Kumar B, Kuhad A, Kuhad A. Lumateperone: a new treatment approach for neuropsychiatric disorders. Drugs Today (Barc). 2018 Dec;54(12):713-719. doi: 10.1358/dot.2018.54.12.2899443. PubMed PMID: 30596390.
T20766	Sulfisoxazole acetyl	N1-Acetylsulfisoxazole	80-74-0	CC(N(c1c(C)c(C)no1)S(c(cc1)ccc1N)(=O)=O)=O	C13H15N3O4S	309.34	FDA		Urinary system;infection	Microbiology/virology	Antibacterial	Bacterial	Sulfisoxazole acetyl is an agent with antibacterial activity. Sulfisoxazole acetyl is a Sulfisoxazole derivative with antibacterial activity. Sulfisoxazole acetyl is an inhibitor of dihydropteroate synthase.	Eunyoung Kim, et al. Simultaneous determination of N(1)-acetyl sulfisoxazole and its metabolites, and relative bioavailability compare to sulfisoxazole in rats. J Pharm Biomed Anal. 2016 Sep 10;129:117-120.
T20744	Nylestriol	Lilly 49825; LY 49825; LY-49825; LY49825; Nilestriolum	39791-20-3	C#C[C@@]1(O)[C@H](O)C[C@@]2([H])[C@]3([H])CCC4=C(C=CC(OC5CCCC5)=C4)[C@@]3([H])CC[C@]12C	C25H32O3	380.52	NMPA		Endocrine system	Endocrinology/Hormones	Estrogen Receptor/ERR	Estrogen Receptor/ERR	Nylestriol is an agonist of estrogen receptor.	Li XF, et al. Effects of Simvastatin and Combination of Simvastatin and Nylestriol on Bone Metabolism in Ovariectomized Rats. Am J Ther. 2016 Nov/Dec;23(6):e1630-e1636.
T22391	Omeprazole Sodium	H 16868 sodium	95510-70-6	Cc1cnc(CS(c2nc(ccc(OC)c3)c3[nH]2)=O)c(C)c1OC.[Na]	C17H19N3NaO3S	368.41	FDA;NMPA;PMDA		Digestive system	Membrane transporter/Ion channel;Autophagy;Microbiology/virology;Metabolism	Proton pump;Autophagy;Antibacterial;P450	Proton pump;Autophagy;Bacterial;CYP2C19	Omeprazole Sodium is a proton pump inhibitor(PPI) and suppresses gastric acid secretion. Omeprazole Sodium is a potent neutral sphingomyelinase (N-SMase) inhibitor (exosome inhibitor). Omeprazole Sodium shows competitive inhibition of CYP2C19 activity with a Ki of 2 to 6 μM. Omeprazole Sodium inhibits growth of Gram-positive and Gram-negative bacteria.	Jonkers D, et al. Omeprazole inhibits growth of gram-positive and gram-negative bacteria including Helicobacter pylori in vitro. J Antimicrob Chemother. 1996 Jan;37(1):145-50.
T17194	Ubrogepant	MK-1602	1374248-77-7	C[C@H]([C@@H](C[C@@H]1NC(c2cnc(C[C@@](C3)(c4c(N5)nccc4)C5=O)c3c2)=O)c2ccccc2)N(CC(F)(F)F)C1=O	C29H26F3N5O3	549.54	FDA		nervous system	Membrane transporter/Ion channel	CGRP Receptor	CGRP	Ubrogepant is an antagonist of calcitonin gene-related peptide receptor that can be used in the acute treatment of migraine studies.	Li CC, et al. Population PK Analyses of Ubrogepant (MK-1602), a CGRP Receptor Antagonist: Enriching In-Clinic Plasma PK Sampling With Outpatient Dried Blood Spot Sampling. J Clin Pharmacol. 2017 Nov 14. doi: 10.1002/jcph.1021.
T12478L	Pinacidil	P-1134; P 1134; P1134; S-1230; S 1230	60560-33-0	CC(C(C)(C)C)N=C(Nc1ccncc1)NC#N	C13H19N5	245.32	FDA		Cardiovascular system	Membrane transporter/Ion channel	Potassium Channel	Potassium Channel	Pinardil (P-1134, S-1230) is a guanidine that opens potassium channels and directly dilates peripheral blood vessels in small arteries, lowering blood pressure and peripheral resistance and producing fluid retention.	Friedel HA, Brogden RN. Pinacidil. A review of its pharmacodynamic and pharmacokinetic properties, and therapeutic potential in the treatment of hypertension. Drugs. 1990 Jun;39(6):929-67. Review. PubMed PMID: 2196168.
T26923	Bunazosin Hydrochloride	E-643; E-1015; E 643; E 1015; E643	52712-76-2	CCCC(N(CCC1)CCN1c(nc(c1c2)N)nc1cc(OC)c2OC)=O.Cl	C19H28ClN5O3	409.91	PMDA		Endocrine system	GPCR/G Protein; Neuroscience	Adrenergic Receptor	α1-adrenoceptor	Bunazosin Hydrochloride is an alpha(1)-adrenoceptor antagonist used as a systemic antihypertensive and an ocular hypotensive drug.	Goto W, Ichikawa M, Tanaka E, Hara H, Araie M. Bunazosin hydrochloride reduces glutamate-induced neurotoxicity in rat primary retinal cultures. Brain Res. 2004 Apr 2;1003(1-2):130-7. PubMed PMID: 15019572.
T3285L	Eslicarbazepine	BIA 2-194	104746-04-5	NC(N(c1c(C[C@@H]2O)cccc1)c1c2cccc1)=O	C15H14N2O2	254.28	FDA		nervous system	Membrane transporter/Ion channel; Neuroscience	Beta-secretase; sodium channel	Beta-secretase; Voltage-gated sodium channel	Eslicarbazepine can be used for adjunctive therapy for adults with partial-onset seizures.	Finelli E, et al. Patch testing in a case of eslicarbazepine and carbamazepine induced cutaneous reaction. Eur Ann Allergy Clin Immunol. 2018 Sep;50(5):229-231.
TP2485	difelikefalin acetate	difelikefalin acetate(1024828-77-0 Free base)	TP2485	CC(O)=O.O=C(C1(N)CCN(C([C@@H](CCCCN)NC([C@@H](CC(C)C)NC([C@@H](CC2=CC=CC=C2)NC([C@@H](CC3=CC=CC=C3)N)=O)=O)=O)=O)CC1)O	C38H57N7O8	739.9	FDA;EMA		nervous system	Endocrinology/Hormones; GPCR/G Protein; Neuroscience	Opioid Receptor	kappa opioid receptor	is a ketone and a building block.	Steven Fishbane, et al. Randomized Controlled Trial of Difelikefalin for Chronic Pruritus in Hemodialysis Patients. Kidney Int Rep. 2020 Jan 28;5(5):600-610.
T16280	Nedocromil	FPL 59002	69049-73-6	CCCc(c(OC(C(O)=O)=C1)c(cc23)C1=O)c2N(CC)C(C(O)=O)=CC3=O	C19H17NO7	371.34	FDA		Respiratory system	GPCR/G Protein; Immunology/Inflammation; Neuroscience	Histamine Receptor; leukotriene receptor; Prostaglandin Receptor	Histamine Receptor; leukotriene C4 (LTC4); prostaglandin D2 receptor	Nedocromil inhibits the action or formation of multiple mediators. Which including histamine, leukotriene C4 (LTC4), and prostaglandin D2 (PGD2).	Wells E, et al. Characterization of primate bronchoalveolar mast cells. II. Inhibition of histamine, LTC4, and PGD2 release from primate bronchoalveolar mast cells and a comparison with rat peritoneal mastcells. J Immunol. 1986 Dec 15;137(12):3941-5.
T11301L	Flomoxef sodium		92823-03-5	O=C(C(N12)=C(CSC3=NN=NN3CCO)CO[C@]2([H])[C@](OC)(NC(CSC(F)F)=O)C1=O)[O-].[Na+]	C15H17F2N6NaO7S2	518.45	PMDA		Urinary system; infection	Others	Others	Others	Flomoxef sodium is an oxacyclovir antibiotic with good antibacterial activity against a variety of gram-positive bacteria.	Yazawa K, et al. In-vitro activity of flomoxef, a new oxacephem group antibiotic, against Nocardia in comparison with other cephalosporins. J Antimicrob Chemother. 1989 Dec;24(6):921-5.
T15133	Dinoprost	Prostaglandin F2a; PGF2α	551-11-1	CCCCC[C@@H](/C=C/[C@H]([C@@H](C/C=C\CCCC(O)=O)[C@H](C1)O)[C@@H]1O)O	C20H34O5	354.48	FDA;NMPA;PMDA;EMA		Reproductive system	Metabolism	Endogenous Metabolite	Human Endogenous Metabolite	Dinoprost is a naturally occurring prostaglandin. It is used in medicine to induce labor and as an abortifacient.	Sharma I, et al. Role of 8-iso-prostaglandin F2alpha and 25-hydroxycholesterol in the pathophysiology of endometriosis. Fertil Steril. 2010 Jun;94(1):63-70.
T38862	Nandrolone acetate	19-Nortestosterone 17β-acetate	1425-10-1	C[C@](CC1)([C@@H](CC2)[C@H](CC3)[C@H]1[C@@H](CC1)C3=CC1=O)[C@H]2OC(C)=O	C20H28O3	316.43	FDA;NMPA		Others	Others	Others	Others	Nandrolone acetate is a competitive inhibitor of isomerase with the Ki of 7 μM for Δ5-3-ketosteroid isomerase of Pseudomonas testosreroni.	Martyr RJ, et al. Affinity labeling of the active sites of delta 5 -ketosteroid isomerase using photoexcited natural ligands. Biochemistry. 1973;12(11):2172-2178.
T31716	Etidocaine Hydrochloride	Duranest; W-19053; W 19053; W19053	36637-19-1	CCCN(CC)C(CC)C(Nc1c(C)cccc1C)=O.Cl	C17H29ClN2O	312.88	FDA		Others	Membrane transporter/Ion channel	sodium channel	Voltage-gated sodium channel	Etidocaine Hydrochloride is a long-acting anesthetic and a blocker of the voltage-gated sodium channel.	Hlava GL, Reinhardt RA, Kalkwarf KL. Etidocaine HCl local anesthetic for periodontal flap surgery. J Periodontol. 1984 Jun;55(6):364-7.
T20720	Norethisterone enanthate	Norigest	3836-23-5	C#C[C@@]1(OC(CCCCCC)=O)CC[C@@]2([H])[C@]3([H])CCC4=CC(CC[C@]4([H])[C@@]3([H])CC[C@]12C)=O	C27H38O3	410.59	NMPA		Reproductive system	Endocrinology/Hormones	Estrogen/progestogen Receptor	progestogen	Norethisterone enanthate is a long-acting parenteral progestogen with antigonadotropic effects.	Kesserü-Koós E, et al. Fertility control with norethindrone enanthate, a long-acting parenteral progestogen. Acta Eur Fertil. 1973 Dec;4(4):203-21.
T3036	Dydrogesterone		152-62-5	C[C@](CC[C@H]1[C@]2(C)CC3)([C@@H](CC4)[C@@H]1C=CC2=CC3=O)[C@H]4C(C)=O	C21H28O2	312.45	FDA; PMDA		Reproductive system	Others	progesterone receptor	progesterone receptor	Dydrogesterone is a potent progestogen which can be used in progesterone deficiency studies.	Griesinger G, et al. Dydrogesterone as an oral alternative to vaginal progesterone for IVF luteal phase support: A systematic review and individual participant data meta-analysis. PLoS One. 2020 Nov 4;15(11):e0241044.
TN6951	Ethyl linoleate	Linoleic Acid ethyl ester	544-35-4	CCCCC/C=C\C/C=C\CCCCCCCC(OCC)=O	C20H36O2	308.5	NMPA		Cardiovascular system	Others	Others	Others	Ethyl linoleate is a natural product and can inhibit the expression of inflammatory mediators and the development of atherosclerotic lesions.	Hyun Jung Koo, et al. Chinese yam extracts containing β-sitosterol and ethyl linoleate protect against atherosclerosis in apolipoprotein E-deficient mice and inhibit muscular expression of VCAM-1 in vitro. J Food Sci. 2014 Apr;79(4):H719-29.
T27172	Difamilast	OPA-15406	937782-05-3	CCOc(cccc1)c1C(NCc1coc(-c(cc2)cc(OC(C)C)c2OC(F)F)n1)=O	C23H24F2N2O5	446.44	PMDA		Inflammation	Metabolism	PDE	PDE4B	Difamilast is a selective inhibitor of phosphodiesterase-4 (PDE4) with particularly efficient inhibition of subtype B (IC50=11.2 nM).	Ahluwalia J, et, al. Phosphodiesterase 4 Inhibitor Therapies for Atopic Dermatitis: Progress and Outlook. Drugs. 2017 Sep;77(13):1389-1397.
T20774	Sarafloxacin	A-56620; A 56620; A56620	98105-99-8	OC(C(C(c1c2)=O)=CN(c(cc3)ccc3F)c1cc(N1CCNCC1)c2F)=O	C20H17F2N3O3	385.36	USP;EMA		Immune system	Microbiology/virology	Antibacterial; Antibiotic	Antibacterial; Antibiotic	Sarafloxacin has antibacterial activities against Gram-positive and Gram-negative bacteria.	Cao Z, et al. The effect of sarafloxacin on Cu/ZnSOD structure and activity. Spectrochim Acta A Mol Biomol Spectrosc. 2015 Feb 5;136 Pt B:601-6.
T15712	Laropiprant	MK-0524	571170-77-9	CS(c1c2n(Cc(cc3)ccc3Cl)c([C@@H](CC(O)=O)CC3)c3c2cc(F)c1)(=O)=O	C21H19ClFNO4S	435.9	EMA		Cerebrovascular system	GPCR/G Protein; Immunology/Inflammation	Prostaglandin Receptor	DP/DP1 Receptor; TP Receptor	Laropiprant is a potent and selective antagonist of prostaglandin D2 (PGD2) receptor (DP) such as and DP/DP1 receptor(Ki = 0.57 nM) and TP Receptor(Ki = 2.95 nM).	Sturino CF, et al. Discovery of a potent and selective prostaglandin D2 receptor antagonist, [(3R)-4-(4-chloro-benzyl)-7-fluoro-5-(methylsulfonyl)-1,2,3,4-tetrahydrocyclopenta[b]indol-3-yl]-acetic acid (MK-0524). J Med Chem. 2007 Feb 22;50(4):794-806.
T13703	Gestonorone Capronate		1253-28-7	CC([C@@]1(OC(CCCCC)=O)CC[C@@]2([H])[C@]3([H])CCC4=CC(CC[C@]4([H])[C@@]3([H])CC[C@]12C)=O)=O	C26H38O4	414.58	PMDA		Reproductive system	GPCR/G Protein; Immunology/Inflammation	Prostaglandin Receptor	Prostaglandin Receptor	Gestonorone Capronate is a progesterone used in benign prostatic hyperplasia and endometrial cancer studies.	Orestano F, et al. Mode of action of progesterone, gestonorone capronate (Depostat) and cyproterone acetate (Androcur) on the metabolism of testosterone in human prostatic adenoma: in vitro and in vivo investigations. J Steroid Biochem. 1975 Jun;6(6):845-51.
T15235	Enocitabine		55726-47-1	CCCCCCCCCCCCCCCCCCCCCC(NC(C=CN1[C@@H]([C@H]2O)O[C@H](CO)[C@H]2O)=NC1=O)=O	C31H55N3O6	565.78	PMDA		Cancer	Cell Cycle/Checkpoint; DNA Damage/DNA Repair; Microbiology/virology; Proteases/Proteasome	DNA/RNA Synthesis; HCV Protease; Nucleoside Antimetabolite/Analog	DNA replication; HCMV; Nucleoside Analogue	Enocitabine is a nucleoside analog. Enocitabine inhibits the replication of human cytomegalovirus(HCMV) and it also has antileukemic and antiviral activities. Enocitabine is also a potent DNA replication inhibitor and a DNA chain terminator.	Hamada A, et al. Clinical pharmacokinetics of cytarabine formulations.Clin Pharmacokinet. 2002;41(10):705-18.
T15195	Ebrotidine	FI3542	100981-43-9	O=S(C1=CC=C(Br)C=C1)(/N=C/NCCSCC2=CSC(NC(N)=N)=N2)=O	C14H17BrN6O2S3	477.42	PMDA		Digestive system	GPCR/G Protein; Immunology/Inflammation; Neuroscience	Histamine Receptor	H2 receptor	Ebrotidine is a competitive H2-receptor antagonist with Ki of 127.5 nM. Ebrotidine has a potent antisecretory activity and evidenced gastroprotection.	Agut J, Sánchez JC, Sacristán A, Action of ebrotidine, ranitidine and cimetidine on the specific binding to histamine H1- and H2-receptors. Arzneimittelforschung. 1997 Apr;47(4A):447-9.
T5329	Trandolapril	RU44570	87679-37-6	CCOC([C@H](CCc1ccccc1)N[C@@H](C)C(N([C@@H](C1)C(O)=O)[C@@H]2[C@@H]1CCCC2)=O)=O	C24H34N2O5	430.54	FDA;PMDA		Cardiovascular system	Metabolism	Angiotensin-converting Enzyme (ACE)	Angiotensin-converting Enzyme (ACE)	Trandolapril is an orally administered angiotensin converting enzyme (ACE) inhibitor that is hydrolysed to the active diacid trandolaprilat.	1. Peters DC, et al. Trandolapril. An update of its pharmacology and therapeutic use in cardiovascular disorders. Drugs. 1998 Nov;56(5):871-93._x000D_
T9717	Chlorcyclizine	1-((4-chlorophenyl)(phenyl)Methyl)-4-Methylpiperazine	82-93-9	CN(CC1)CCN1C(c1ccccc1)c(cc1)ccc1Cl	C18H21ClN2	300.83	NMPA		Inflammation	GPCR/G Protein; Immunology/Inflammation; Neuroscience; Microbiology/virology; Proteases/Proteasome	HCV Protease; Histamine Receptor	H1 receptor; HCV	CHLORCYCLIZINE is a histamine H1 antagonist and a potent hepatitis C virus (HCV) entry inhibitor.	1. Enright BP, et al. Effects of the histamine H1 antagonist Chlorcyclizine on rat fetal palate development. Birth Defects Res B Dev Reprod Toxicol. 2010 Dec;89(6):474-84._x000D_
T34896	Tofisopam	Emandaxin; Grandaxin	22345-47-7	CCC(c1c2)C(C)=NN=C(c(cc3)cc(OC)c3OC)c1cc(OC)c2OC	C22H26N2O4	382.45	PMDA		nervous system	Others	Others	Others	Tofisopam is a 2,3-benzodiazepine derivative with anti-anxiety property.	Hatayama M, et al. Acute Effects of Oral Tofisopam on Plasma Concentration and Urinary Excretion of Uric Acid and Oxypurinol. Curr Clin Pharmacol. 2015 Jan 26.
T7724	Tepoxalin	ORF-20485; ORF20485; ORF 20485; RWJ-20485; RWJ 20485; RWJ20485	103475-41-8	CN(C(CCc(cc1-c(cc2)ccc2Cl)nn1-c(cc1)ccc1OC)=O)O	C20H20ClN3O3	385.84	EMA		Others	Immunology/Inflammation; Neuroscience; Metabolism	COX; Lipoxygenase	5-LOX; COX-1; COX-2	Tepoxalin is a 5-lipoxygenase inhibitor potentially for the treatment of asthma, osteoarthritis. Tepoxalin inhibits COX-1, COX-2, and 5-LOX. Tepoxalin is a potent inhibitor of sheep seminal vesicle cyclooxygenase (COX) (IC50 = 4.6 microM), rat basophilic leukemia cell (RBL-1) lysate COX (IC50 = 2.85 microM) and COX from intact RBL-1 cells (IC50 = 4.2 microM).	Lopes C, et al. Effect of tepoxalin on renal function and hepatic enzymes in dogs exposed to hypotension with isoflurane. Vet Anaesth Analg. 2014 Sep;41(5):459-67.
T16696	Pyriproxyfen	S-31183	95737-68-1	CC(COc(cc1)ccc1Oc1ccccc1)Oc1ncccc1	C20H19NO3	321.37	EMA		Others	Others	Others	Others	Pyriproxyfen is an insecticide that acts as a biomimetic of juvenile hormone.	Azevedo RDS, et al. Effects of pyriproxyfen on zebrafish brain mitochondria and acetylcholinesterase. Chemosphere. 2021 Jan;263:128029.
T16539	Piperazine citrate		144-29-6	OC(CC(O)=O)(CC(O)=O)C(O)=O.OC(CC(O)=O)(CC(O)=O)C(O)=O.C1NCCNC1.C1NCCNC1.C1NCCNC1	C24H46N6O14	642.65	FDA;NMPA		Infection	Membrane transporter/Ion channel; Neuroscience	GABA Receptor	GABA	Piperazine citrate, an organic compound, consists of a six-membered ring, containing two nitrogen atoms at opposite positions in the ring. It used as an Anthelmintic.	Ghasi S. Piperazine protects the rat heart against sudden cardiac death from barium chloride-induced ventricular fibrillation. Am J Ther. 2008 Mar-Apr;15(2):119-25.
T9620	Sodium Tetradecyl Sulfate	Tetradecyl sodiuM sulfate	1191-50-0	CCCCCCCCCCCCCCOS(=O)(O)=O.[Na]	C14H30NaO4S	317.44	FDA		Others	Others	Others	Others	Sodium Tetradecyl Sulfate is a detergent sclerosant with antithrombotic effects and commonly used for the treatment of varicose veins.	Tan KT, et al. Percutaneous sodium tetradecyl sulfate sclerotherapy for peripheral venous vascular malformations: a single-center experience. J Vasc Interv Radiol. 2007;18(3):343-351.
T22285	Carboprost	15(S)-15-Methyl Prostaglandin F2α;15-Methyl-PGF2α	35700-23-3	CCCCC[C@@](C)(/C=C/[C@H]([C@@H](C/C=C\CCCC(O)=O)[C@H](C1)O)[C@@H]1O)O	C21H36O5	368.51	FDA;NMPA		Reproductive system	GPCR/G Protein; Immunology/Inflammation	Prostaglandin Receptor	prostaglandin F2α	Carboprost is a synthetic prostaglandin analogue of PGF2α which has the effect of oxytocic. Carboprost is commonly used to restore uterine tone.	Vallera C, et al. Uterotonic Medications: Oxytocin, Methylergonovine, Carboprost, Misoprostol. Anesthesiol Clin. 2017 Jun;35(2):207-219.
T33470	Monoctanoin	Glyceryl 1-caprylate; Moctanin	502-54-5	CCCCCCCC(OCC(CO)O)=O	C11H22O4	218.29	FDA		others	Microbiology/virology	Antibacterial	E. coli; S. aureus	Monoctanoin has antibacterial activity against Staphylococcus aureus and Escherichia coli.	Wang J, et al. In Vitro Antibacterial Activity and Mechanism of Monocaprylin against Escherichia coli and Staphylococcus aureus. J Food Prot. 2018 Dec;81(12):1988-1996.
T20626	Esomeprazole		119141-88-7	Cc1cnc(C[S@@](c2nc(ccc(OC)c3)c3[nH]2)=O)c(C)c1OC	C17H19N3O3S	345.42	FDA;NMPA;PMDA;EMA		Digestive system	Membrane transporter/Ion channel; Proteases/Proteasome	Cysteine Protease; Proton pump	lysosomal cysteine protease; Proton pump	Esomeprazole is the S-isomer of omeprazole, inhibits the lysosomal cysteine protease legumain to prevent cancer metastasis. Esomeprazole is a proton pump inhibitors (PPI).	Zhao T, et al. Esomeprazole inhibits the lysosomal cysteine protease legumain to prevent cancer metastasis. Invest New Drugs. 2021 Apr;39(2):337-347.
T22337	Ganciclovir sodium	RS-21592 sodium; Cytovene IV sodium; BW 759 sodium; 2'-Nor-2'-deoxyguanosine sodium	107910-75-8	NC(NC1=C2N=CN1COC(CO)CO)=NC2=O.[Na]	C9H13N5NaO4	278.22	FDA;NMPA;PMDA;EMA		infection	Cell Cycle/Checkpoint; DNA Damage/DNA Repair; Microbiology/virology	Antifection; HSV; Nucleoside Antimetabolite/Analog	CMV; Feline herpesvirus type-1(FHV-1); HSV-1; Nucleoside Antimetabolite/Analog	Ganciclovir Sodium is the sodium salt of Ganciclovir with antiviral activity, especially against cytomegalovirus (CMV) and herpes simplex virus type 1 (HSV-1).	Maggs DJ, Clarke HE. In vitro efficacy of ganciclovir, cidofovir, penciclovir, foscarnet, idoxuridine, and acyclovir against feline herpesvirus type-1. Am J Vet Res. 2004 Apr;65(4):399-403.
T23132	Pentamidine dihydrochloride	MP-601205 dihydrochloride	50357-45-4	NC(c(cc1)ccc1OCCCCCOc(cc1)ccc1C(N)=N)=N.Cl.Cl	C19H26Cl2N4O2	413.34	FDA;PMDA		inflammation;infection	Metabolism; Microbiology/virology	Antibacterial; Antibiotic; Antifungal; Parasite; Phosphatase	Antibiotic; Bacterial; Fungal; Parasite; Phosphatase	Pentamidine dihydrochloride is an aromatic diamidine agent with activity against a number of microorganisms including protozoa (Trypanosoma brucei, Leishmania spp., and Babesia spp.) and fungi (Pneumocystis jirovecii). Pentamidine dihydrochloride is a potent and selective protein tyrosine phosphatases and phosphatase of regenerating liver inhibitor. Pentamidine dihydrochloride inhibits parasite L…	Nguewa, P.A., et al., Pentamidine is an antiparasitic and apoptotic drug that selectively modifies ubiquitin. Chem Biodivers, 2005. 2(10): p. 1387-400.
T22316	Doxazosin	UK 33274	74191-85-8	COc(cc1c(N)nc(N(CC2)CCN2C(C2Oc(cccc3)c3OC2)=O)nc1c1)c1OC	C23H25N5O5	451.48	FDA;NMPA;PMDA		Reproductive system;Cardiovascular system	GPCR/G Protein; Neuroscience	Adrenergic Receptor	α1-adrenergic receptor	Doxazosin is a long-lasting inhibitor of α1-adrenoceptors that is widely used to treat benign prostatic hyperplasia and lower urinary tract symptoms.	Miura, Y. and K. Yoshinaga, Doxazosin: a newly developed, selective alpha 1-inhibitor in the management of patients with pheochromocytoma. Am Heart J, 1988. 116(6 Pt 2): p. 1785-9.
T13692	Ferric maltol	Iron(III) 2-methyl-4-oxo-4H-pyran-3-olate	33725-54-1	CC1=C2[O-][Fe+3]([O-]C3=C4C)([O-]C5=C6C)(O=C5C=CO6)(O=C3C=CO4)O=C2C=CO1	C18H15FeO9	431.15	FDA;EMA		Others	Others	Others	Others	Ferric maltol is a ferric, non-salt-based oral iron formulation demonstrating improved tolerance in patients with previous intolerance to other iron formulations.	Stallmach A, et al. Ferric maltol (ST10): a novel oral iron supplement for the treatment of iron deficiency anemia in inflammatory bowel disease. Expert Opin Pharmacother. 2015;16(18):2859-67.
T15130	Dilazep dihydrochloride		20153-98-4	COC1=CC(C(OCCCN2CCCN(CC2)CCCOC(C3=CC(OC)=C(C(OC)=C3)OC)=O)=O)=CC(OC)=C1OC.Cl.Cl	C31H46Cl2N2O10	677.61	NMPA;PMDA		Cardiovascular system	Others	Others	Adenosine uptake	Dilazep dihydrochloride is an adenosine uptake inhibitor. Dilazep dihydrochloride also inhibits the ischemic damage, membrane transport of nucleosides and platelet aggregation. Dilazep dihydrochloride has cerebral and coronary vasodilating action through enhancement of effect of adenosine.	Zhang Y, et al. Dilazep potentiation of adenosine-mediated superior mesenteric arterial vasodilation. J Pharmacol Exp Ther. 1991 Sep;258(3):767-71.
T7586	trifarotene	CD5789	895542-09-3	CC(C)(C)c(cc(cc1)-c(cc(cc2)-c(cc3)ccc3C(O)=O)c2OCCO)c1N1CCCC1	C29H33NO4	459.58	FDA;EMA		Others	Autophagy; Metabolism	Autophagy; Retinoid Receptor	Autophagy; RARγ	trifarotene is a potent and selective RARγ agonist with 65-fold and 16-fold selectivitiy for the RARγ (EC50=7.7 nM) over RARα (EC50=500 nM) and RARβ (EC50=125 nM).	Etienne Thoreau, et al. Structure-based design of Trifarotene (CD5789), a potent and selective RARγ agonist for the treatment of acne. Bioorg Med Chem Lett. 2018 Jun 1;28(10):1736-1741.
T25268L	Coblopasvir dihydrochloride	Coblopasvir dihydrochloride(1312608-46-0 Free base)	1966138-53-3	O=C(OC)N[C@@H](C(N1[C@@H](C2=NC=C(C3=CC=C(C4=C5OCOC5=C(C6=CN=C([C@H]7N(C([C@@H](NC(OC)=O)C(C)C)=O)CCC7)N6)C=C4)C=C3)N2)CCC1)=O)C(C)C.[H]Cl.[H]Cl	C41H52Cl2N8O8	855.81	NMPA		Digestive system; infection	Microbiology/virology; Proteases/Proteasome	HCV Protease	HCV NS5A	Coblopasvir dihydrochloride can be used to study chronic HCV infection and is a pan-genotypic nonstructural protein 5A (NS5A) inhibitor.	Gao Y, et al. Coblopasvir and sofosbuvir for treatment of chronic hepatitis C virus infection in China: A single-arm, open-label, phase 3 trial. Liver Int. 2020;40(11):2685-2693.
T22981	Tetradecyltrimethylammonium bromide	MitMAB; Cetrimide; tetradecyl trimethyl ammonium bromide	1119-97-7	CCCCCCCCCCCCCC[N+](C)(C)C.[Br-]	C17H38BrN	336.39	Canada		Others	Cytoskeletal Signaling	Dynamin	Dnm1 GTPase	MitMAB is a Dynamin GTPase activity inhibitor and a cationic surfactant with asymmetrical structure.	N. Gorski, et al. Mixtures of Nonionic and Ionic Surfactants. The Effect of Counterion Binding in Mixtures of Tetradecyldimethylamine Oxide and Tetradecyltrimethylammonium Bromide. Langmuir 1994, 10, 8, 2594-2603.
T21425	Mephenytoin	Methoin; Mesantoin; Phenantoin; Methylphenetoin; Insulton	50-12-4	CCC(C(N1C)=O)(c2ccccc2)NC1=O	C12H14N2O2	218.25	FDA		nervous system	Metabolism	P450	CYP2B6; CYP2C19	Mephenytoin is an anticonvulsant and a substrate of CYP2C19 and CYP2B6.	Vijayabhaskar V, Srivastava P, Rajagopal S. Breaking the sensitivity limitations of cytochrome P450 oxidation product: dansyl chloride derivatisation of 4-OH mephenytoin, a CYP2C19 metabolite and its application to in vitro CYP inhibition assay. J Chromatogr B Analyt Technol Biomed Life Sci. 2015 May 1;989:27-36.
T19399	L-Ornithine L-aspartate	Ornithine Aspartate	3230-94-2	NCCC[C@@H](C(O)=O)N.N[C@@H](CC(O)=O)C(O)=O	C9H19N3O6	265.26	NMPA		Metabolism;Digestive system	Others	Others	Others	L-Ornithine L-aspartate lowers blood ammonia concentration and to eliminate symptoms of hepatic encephalopathy associated with liver cirrhosis.	Sikorska H, et al. [Physiological functions of L-ornithine and L-aspartate in the body and the efficacy of administration of L-ornithine-L-aspartate in conditions of relative deficiency]. Pol Merkur Lekarski. 2010 Jun;28(168):490-5.
T15246	Esaxerenone	CS-3150; XL-550	1632006-28-0	O=C(NC1=CC=C(C=C1)S(=O)(C)=O)C2=CN(C(C3=CC=CC=C3C(F)(F)F)=C2C)CCO	C22H21F3N2O4S	466.47	PMDA		Cardiovascular system	Endocrinology/Hormones	Glucocorticoid Receptor	Mineralocorticoid receptor	Esaxerenone is a highly potent and selective non-steroidal antagonist of the mineralocorticoid receptor.	Yamada M, et al. Pharmacokinetics, distribution, and disposition of esaxerenone, a novel, highly potent and selective non-steroidal mineralocorticoid receptor antagonist, in rats and monkeys. Xenobiotica. 2017 Dec;47(12):1090-1103.
T15096	Delgocitinib	JTE-052; Corectim（Delgocitinib）	1263774-59-9	C[C@@H](C1)[C@](CC2)(CN2c2ncnc3c2cc[nH]3)N1C(CC#N)=O	C16H18N6O	310.35	PMDA;EMA		Inflammation	Angiogenesis; Chromatin/Epigenetic; JAK/STAT signaling; Stem Cells; Tyrosine Kinase/Adaptors	JAK; Tyrosine Kinases	JAK1; JAK2; JAK3; Tyk2	Delgocitinib is a novel and specific inhibitor of JAK (IC50s: 2.8, 2.6, 13 and 58 nM for JAK1, JAK2, JAK3 and Tyk2, respectively) .	Tanimoto A, et al. Pharmacological properties of JTE-052: a novel potent JAK inhibitor that suppresses various inflammatory responses in vitro and in vivo. Inflamm Res. 2015 Jan;64(1):41-51.
TN2285	DL-Tryptophan	Tryptophan; DL-Tryptophan; (±)-Tryptophan	54-12-6	N[C@@H](Cc1c[nH]c2c1cccc2)C(O)=O	C11H12N2O2	204.23	NMPA		others	Metabolism; Neuroscience	Endogenous Metabolite; Serotonin Transporter	Human Endogenous Metabolite; serotonin	Tryptophan containing dipeptides are interesting ingredients for functional foods as a natural prevention for hypertension with reduced side effects due to its selective inhibition of the C-domain. Low thalamic Tryptophan uptake appears to be a strong, independent predictor of long survival in patients with previous glioma treatment.	Di Pizio A, Nicoli A. In Silico Molecular Study of Tryptophan Bitterness. Molecules. 2020 Oct 11;25(20):4623.
T9636	Dalpiciclib	SHR-6390	1637781-04-4	CC(C1=C(C)c2cnc(Nc3ncc(C4CCNCC4)cc3)nc2N(C2CCCC2)C1=O)=O	C25H30N6O2	446.54	NMPA		Cancer	Cell Cycle/Checkpoint	CDK	CDK4; CDK6	Dalpiciclib is a highly selective, orally bioavailable, and comparable potency inhibitor of CDK4 and CKD6 with IC50s of 12.4 nM and 9.9 nM, respectively. Dalpiciclib exerts potent antitumor activity in esophageal squamous cell carcinoma by inhibiting phosphorylated tumor suppressor retinoblastoma protein (Rb) and inducing G1 cell cycle arrest.	Zhang P, et al. A phase 1 study of dalpiciclib, a cyclin-dependent kinase 4/6 inhibitor in Chinese patients with advanced breast cancer. Biomark Res. 2021;9(1):24. Published 2021 Apr 12.
T19861	Niceritrol	Bufor; Cardiolipol; Perycit	5868-05-3	C1=CC(=CN=C1)C(=O)OCC(COC(=O)C2=CN=CC=C2)(COC(=O)C3=CN=CC=C3)COC(=O)C4=CN=CC=C4	C29H24N4O8	556.52	PMDA		Cardiovascular system	Others	Others	Others	Niceritrol is a niacin ester that reduces cholesterol and triglycerides in total plasma and in the VLD and LD lipoprotein fractions.	Owada A, Suda S, Hata T. Antiproteinuric effect of niceritrol, a nicotinic acid derivative, in chronic renal disease with hyperlipidemia: a randomized trial. Am J Med. 2003 Apr 1;114(5):347-53.
T19841	Tribenoside	Ba 2140; BG-356; Glivenol; Glyvenal; Glyvenol; TBGF	10310-32-4	CCOC([C@@H]1O)O[C@H]([C@@H](COCc2ccccc2)OCc2ccccc2)[C@@H]1OCc1ccccc1	C29H34O6	478.58	PMDA		Digestive system	Others	Others	Others	Tribenoside is a vasoprotectant with mild anti-inflammatory, analgesic, and wound healing properties.	Kikkawa Y, Takaki S, Matsuda Y, Okabe K, Taniguchi M, Oomachi K, Samejima T, Katagiri F, Hozumi K, Nomizu M. The influence of Tribenoside on expression and deposition of epidermal laminins in HaCaT cells. Biol Pharm Bull. 2010;33(2):307-10.
T22448	Tropisetron	ICS 205-930; Tropisetronum; Tropisteron	89565-68-4	CN1[C@@H]2CC[C@H]1C[C@@H](OC(C3=CNC4=CC=CC=C43)=O)C2	C17H20N2O2	284.35	NMPA		Nervous system	GPCR/G Protein; Neuroscience	5-HT Receptor; AChR	5-HT3; α7 nAChR	Tropisetron is an α7-nicotinic receptor agonist and 5-HT3 receptor antagonist with Kis of 6.9 nM and 5.3 nM, respectively.	Macor JE, et al. Bioorg Med Chem Lett. 2001, 11(3):319-21.
T15773	Lofepramine	Lopramine; Amplit; Leo 640; Gamanil	23047-25-8	CN(CCCN(c1c(CC2)cccc1)c1c2cccc1)CC(c(cc1)ccc1Cl)=O	C26H27ClN2O	418.96	PMDA		Nervous system	GPCR/G Protein; Neuroscience	5-HT Receptor; Norepinephrine	norepinephrine reuptake; serotonin reuptake	Lofepramine is a potent tricyclic antidepressant that is extensively metabolized to desipramine. It inhibits the serotonin and norepinephrine transporters by inhibiting neurons with Kd values of 70 and 5.4 nM, respectively, with weak antagonism of serotonin, histamine and muscarinic receptors.	Lancaster SG, et al. Lofepramine. A review of its pharmacodynamic and pharmacokinetic properties, and therapeutic efficacy in depressive illness. Drugs. 1989 Feb;37(2):123-40.
T14979	Clavulanate lithium	Clavulanic acid lithium	61177-44-4	[Li+].C1[C@@H]2N(C1=O)[C@H](/C(=C/CO)/O2)C(=O)[O-]	C8H8LiNO5	205.09	FDA;NMPA;PMDA		Inflammation;infection	Microbiology/virology	Antibacterial	β-lactamase	Clavulanate lithium is an inhibitor of β-lactamase.	Reading C, et al. Clavulanic Acid: a Beta-Lactamase-Inhibiting Beta-Lactam from Streptomyces clavuligerus. Antimicrob Agents Chemother. 1977 May; 11(5): 852–857.
T12732	Rezafungin	Biafungin; CD101; SP-3025	1396640-59-7	CCCCCOC1=CC=C(C=C1)C2=CC=C(C=C2)C3=CC=C(C=C3)C(=O)NC4CC(C(NC(=O)C5C(C(CN5C(=O)C(NC(=O)C(NC(=O)C6CC(CN6C(=O)C(NC4=O)C(C)O)O)C(C(C7=CC=C(C=C7)O)O)O)C(C)O)C)O)OCC[N+](C)(C)C)O	C63H85N8O17	1226.39	EMA		infection	Microbiology/virology	Antifungal	Fungal; glucan synthase	Rezafungin is a broad-spectrum and long-lasting echinocandin with potent antifungal activity against Candida, Aspergillus and Pneumocystis.	Miesel L, et al. Efficacy of Rezafungin in Prophylactic Mouse Models of Invasive Candidiasis, Aspergillosis, and Pneumocystis Pneumonia. Antimicrob Agents Chemother. 2021 Feb 17;65(3):e01992-20.
T14490	Talipexole dihydrochloride	B-HT 920 dihydrochloride; Domnin	36085-73-1	C=CCN(CC1)CCc2c1nc(N)s2.Cl.Cl	C10H17Cl2N3S	282.23	PMDA		Nervous system	GPCR/G Protein; Neuroscience	5-HT Receptor; Adrenergic Receptor; Dopamine Receptor	5-HT3; D2; α2-adrenergic receptor	Talipexole dihydrochloride is a dopamine D2 receptor agonist, α2-adrenoceptor agonist, and 5-HT3 receptor antagonist in both rat cortical and intestinal membrane fractions with Ki values of 0.35 μM and 0.22 μM, respectively. It displays antiParkinsonian activity.	Ricci and Taira Adrenoceptor involvement in the cardiovascular responses to B-HT 920 in sinoaortic denervated rats. Gen.Pharmacol. (1999)32 29.
T23358	Sitagliptin phosphate	Januvia; MK-0431 phosphate	654671-78-0	N[C@@H](CC(N1Cc2nnc(C(F)(F)F)n2CC1)=O)Cc(c(F)c1)cc(F)c1F.OP(O)(O)=O	C16H18F6N5O5P	505.31	FDA;NMPA;PMDA;EMA	Endocrine system	Endocrine system	Autophagy; Proteases/Proteasome	Autophagy; DPP-4	Autophagy; DPP-4	Sitagliptin phosphate is a dipeptidyl peptidase-4 (DPP4) inhibitor.	Thomas L, Eckhardt M, Langkopf E, Tadayyon M, Himmelsbach F, Mark M. (R)-8-(3-amino-piperidin-1-yl)-7-but-2-ynyl-3-methyl-1-(4-methyl-quinazolin-2-ylmethyl)-3,7-dihydro-purine-2,6-dione (BI 1356), a novel xanthine-based dipeptidyl peptidase 4 inhibitor, has a superior potency and longer duration of action compared with other dipeptidyl peptidase-4 inhibitors. J Pharmacol Exp Ther. 2008 Apr;325(1)…
T21430	Oxytetracycline Hydrochloride	Oxytetracycline HCl; Biosolvomycin; Oxytetracycline.HCl; Dalinmycin; Dalimycin; Oxytetracycline, Sodium Salt	2058-46-0	[H]Cl.O=C(C(C1=O)=C(O)[C@@H](N(C)C)[C@]2([H])[C@@H](O)[C@]3([H])[C@](C)(O)C4=C(C(C3=C(O)[C@@]21O)=O)C(O)=CC=C4)N	C22H25ClN2O9	496.89	FDA;NMPA;PMDA	infection	infection	Immunology/Inflammation; Metabolism; Microbiology/virology	Antibacterial; Antiviral; Endogenous Metabolite; HSV	Antibacterial; Antiviral; Bacterial; HSV-1; Human Endogenous Metabolite	Oxytetracycline Hydrochloride is a tetracycline derivative produced by Streptomyces rimosus with antimicrobial activity. It interferes with the binding of aminoacyl-tRNA to the mRNA-ribosome complex, resulting in preventing peptide elongation and inhibiting protein synthesis.	Morales-Nin B, Grau A, Pérez-Mayol S, Pastor E, Palmer M. Oxytetracycline hydrochloride vital labelling revisited: the case of Dicentrarchus labrax and Diplodus puntazzo. J Fish Biol. 2011 Mar;78(3):762-82.
T21390	Fexofenadine	Carboxyterfenadine; Allegra; MDL 16.455; Telfast; Carboxyterfenadine	83799-24-0	CC(C)(C(O)=O)c1ccc(C(CCCN(CC2)CCC2C(c2ccccc2)(c2ccccc2)O)O)cc1	C32H39NO4	501.66	FDA;NMPA;PMDA		Inflammation	GPCR/G Protein; Immunology/Inflammation; Neuroscience	Histamine Receptor	Histamine Receptor	Fexofenadine, an antihistamine pharmaceutical drug, is used to treat allergy symptoms, such as nasal congestion, hay fever, and urticaria. Compared to first-generation antihistamines, Fexofenadine is less able to pass the blood-brain barrier and cause sedation.	Miura M, Uno T. Clinical pharmacokinetics of fexofenadine enantiomers. Expert Opin Drug Metab Toxicol. 2010 Jan;6(1):69-74.
T7858	Ceftezole sodium	Alomen; Ceftezole sodium; Celoslin; Falomesin	41136-22-5	[Na+].[O-]C(=O)C1=C(CSc2nncs2)CS[C@@H]3[C@H](NC(=O)Cn4cnnn4)C(=O)N13	C13H11N8NaO4S3	462.46	NMPA		Inflammation	Metabolism; Microbiology/virology	Anti-infection; Antibacterial; Antibiotic; Glucokinase	Anti-infection; Antibacterial; Antibiotic; α-glucosidase	Ceftezole sodium is a broad-spectrum cephalosporin antibiotic active gram-negative and gram-positive bacteria except for Proteus vulgaris, Pseudomonas aeruginosa, and Serratia marcescens. It has the inhibition of cell wall synthesis via affinity for penicillin-binding proteins. It also inhibits alpha-glucosidase.	Nishida M, Murakawa T, Kamimura T, Okada N, Sakamoto H, Fukada S, Nakamoto S, Yokota Y, Miki K. In vitro and in vivo evaluation of ceftezole, a new cephalosporin derivative. Antimicrob Agents Chemother. 1976 Jul;10(1):1-13.
T20157	Brimonidine	AGN 190342; AGN-190342; AGN190342; Bromoxidine	59803-98-4	Brc(c1nccnc1cc1)c1NC1=NCCN1	C11H10BrN5	292.14	FDA;NMPA;PMDA;EMA		nervous system	GPCR/G Protein; Neuroscience	Adrenergic Receptor	α2 adrenergic receptor	Brimonidine is a drug used as eye drops under the brand names Alphagan and Alphagan-P. It is used to treat open-angle glaucoma or ocular hypertension	Chopin, P., F.C. Colpaert, and M. Marien, Effects of alpha-2 adrenoceptor agonists and antagonists on circling behavior in rats with unilateral 6-hydroxydopamine lesions of the nigrostriatal pathway. J Pharmacol Exp Ther, 1999. 288(2): p. 798-804.
T13083L	Tafenoquine Succinate	WR 238605 (Succinate)	106635-81-8	O=C(O)CCC(O)=O.CC(NC1=C2N=C(OC)C=C(C)C2=C(OC3=CC=CC(C(F)(F)F)=C3)C(OC)=C1)CCCN	C28H34F3N3O7	581.58	FDA		infection	Others	Others	antimalarial	Tafenoquine Succinate is an 8-aminoquinoline. and is an agent of anti-malarial prophylactic.	Marcsisin SR, et al. Tafenoquine and NPC-1161B require CYP 2D metabolism for anti-malarial activity: implications for the 8-aminoquinoline class of anti-malarial compounds. Malar J. 2014 Jan 3;13:2.
T21447	Tolazoline	Vasimid; Benzalolin; Divascol; Pridazole; Priscol; Priscoline	59-98-3	C(C1=NCCN1)c1ccccc1	C10H12N2	160.22	FDA		Respiratory system	GPCR/G Protein; Neuroscience	Adrenergic Receptor	α-adrenergic receptor	Tolazoline, a non-selective competitive α-adrenergic receptor antagonist, is used as a vasodilator to treat spasms of peripheral blood vessels. It has also been used successfully as an antidote to reverse the severe peripheral vasoconstriction as a result of overdose with certain 5-HT2A agonist drugs.	Casbeer HC, Knych HK. Pharmacokinetics and pharmacodynamic effects of tolazoline following intravenous administration to horses. Vet J. 2013 Jun;196(3):504-9.
T21419	Diphenhydramine	Syntedril; PM255; PM-255; Diphenhydramine; Dabylen; Debendrin	58-73-1	CN(C)CCOC(c1ccccc1)c1ccccc1	C17H21NO	255.35	PMDA		Inflammation	GPCR/G Protein; Immunology/Inflammation; Neuroscience	Histamine Receptor	H1 receptor	Diphenhydramine, a first-generation antihistamine possessing antiemetic, antitussive, anticholinergic, and sedative properties, is mainly used in the treatment of allergies. Diphenhydramine is also used in the management of drug-induced parkinsonism and other extrapyramidal symptoms.	Abdi A, Rose E, Levine M. Diphenhydramine overdose with intraventricular conduction delay treated with hypertonic sodium bicarbonate and i.v. lipid emulsion. West J Emerg Med. 2014 Nov;15(7):855-8.
T19333	Gadoteridol	SQ-32692; Gd-HP-DO3A; ProHance	120066-54-8	CC1O[Gd+3]2([N]3(CC4)CC5=O)([N]6(CC7)CC([O-]2)=O)([N]47CC8=O)([O-]8)([O-]5)[N](CC6)(CC3)C1	C17H28GdN4O7	557.68	FDA;PMDA		nervous system	Others	Others	Others	Gadoteridolused in the imaging of the central nervous system that is used for a gadolinium-based MRI contrast agent.	Krishan Kumar et al.Gadoteridol. Analytical Profiles of Drug Substances and Excipients, Academic Press, Volume 24,1996,Pages 209-241,
T14319	Aripiprazole Lauroxil		1259305-29-7	CCCCCCCCCCCC(OCN(C(CC1)=O)c2c1ccc(OCCCCN(CC1)CCN1c1cccc(Cl)c1Cl)c2)=O	C36H51Cl2N3O4	660.71	FDA	nervous system	nervous system	GPCR/G Protein; Neuroscience	5-HT Receptor; Dopamine Receptor	5-HT1A; 5-HT2A; D2 receptor	Aripiprazole lauroxil, the N-acyloxymethyl prodrug form of aripiprazole, a long-acting injectable (LAI) antipsychotic. Aripiprazole lauroxil is cleaved by esterases in vivo to N-hydroxymethyl aripiprazole (lauric acid), which is then cleaved to aripiprazole, which is non-toxic.	Jann MW, et al. Long-Acting Injectable Second-Generation Antipsychotics:An Update and Comparison Between Agents.CNS Drugs. 2018 Mar;32(3):241-257.
T12480	Pipamperone	Floropipamide; McN-JR 3345; R 3345	1893-33-0	NC(C1(CCN(CCCC(c(cc2)ccc2F)=O)CC1)N1CCCCC1)=O	C21H30FN3O2	375.48	PMDA		nervous system	GPCR/G Protein; Neuroscience	5-HT Receptor; Dopamine Receptor	5-HT1; 5-HT2A; 5-HT2C; D2; D4; α1 receptor	Pipamperone binds 5-HT2A closely as receptor.	Erik Buntinx, MD, et al. Selective Serotonergic Properties of Low-Dose Pipamperone May Enhance Antidepressant Effect: Preclinical Evidence.
T0947L	Dexamethasone Phosphate disodium	EGP-437; EGP 437; EGP437. Dex-Phos	2392-39-4	C[C@@H]1C[C@H]2[C@@H]3CCC4=CC(C=C[C@@]4([C@]3([C@H](C[C@@]2([C@]1(C(COP([O-])([O-])=O)=O)O)C)O)F)C)=O.[Na+].[Na+]	C22H28FNa2O8P	516.4	FDA;EMA;PMDA;NMPA		Inflammation	Endocrinology/Hormones	Glucocorticoid Receptor	Glucocorticoid Receptor	Dexamethasone disodium phosphate is a water-soluble form of the synthetic glucocorticoid dexamethasone.	Torres MP, Entwistle F, Coote PJ. Effective immunosuppression with dexamethasone phosphate in the Galleria mellonella larva infection model resulting in enhanced virulence of Escherichia coli and Klebsiella pneumoniae. Med Microbiol Immunol. 2016 Aug;205(4):333-43. doi: 10.1007/s00430-016-0450-5. PubMed PMID: 26920133; PubMed Central PMCID: PMC4939170.
T0262L2	Dextromethorphan	Levomethorphan; RACEMETHORPHAN	125-71-3	[H][C@@]12CCCC[C@@]13C4=CC(OC)=CC=C4C[C@]2([H])N(C)CC3	C18H25NO	271.4	FDA		Respiratory systems	Others	Others	Others	Dextromethorphan is an NMDA receptor antagonist used to treat cases of dry cough.	Porsteinsson AP, Antonsdottir IM. An update on the advancements in the treatment of agitation in Alzheimer's disease. Expert Opin Pharmacother. 2017 Apr;18(6):611-620. doi: 10.1080/14656566.2017.1307340. Epub 2017 Mar 28. Review. PubMed PMID: 28300462.
T1186L	Ifenprodil	RC 61-91; RC-61-91; RC61-91; RC 6191; RC61-91	23210-56-2	CC(C(c(cc1)ccc1O)O)N1CCC(Cc2ccccc2)CC1	C21H27NO2	325.44	PMDA		cerebrovascular disease	GPCR/G Protein; Neuroscience	Adrenergic Receptor; NMDAR	NMDA; α2 adrenergic receptor	Ifenprodil is an inhibitor of the NMDA receptor, specifically of GluN1 (glycine-binding NMDA receptor subunit 1) and GluN2B (glutamate-binding NMDA receptor subunit 2) subunits. Additionally, ifenprodil inhibits GIRK channels and interacts with alpha1 adrenergic, serotonin, and sigma receptors.	Reynolds IJ, Miller RJ (1989). "Ifenprodil is a novel type of N-methyl-D-aspartate receptor antagonist: interaction with polyamines". Mol. Pharmacol. 36 (5): 758–65. PMID 2555674.
T0860L	Mefloquine	Lariam; Ro 215998; Ro-215998; Ro215998; WR 142490	53230-10-7	O[C@H]([C@@H]1NCCCC1)C2=CC(C(F)(F)F)=NC3=C(C(F)(F)F)C=CC=C23	C17H16F6N2O	378.31	FDA		infection	Others	Others	Others	Mefloquine, a quinoline antimalarial agent, is an anti-SARS-CoV-2 entry inhibitor. Mefloquine is also a K+ channel (KvQT1/minK) antagonist with an IC50 of ~1 μM. Mefloquine can be used for malaria, systemic lupus erythematosus, and cancer research.	Kang J, et al. Interactions of the antimalarial drug mefloquine with the human cardiac potassium channels KvLQT1/minK andHERG. J Pharmacol Exp Ther. 2001 Oct;299(1):290-6.
T20062	Thiamine disulfide	Algoneurina; Daiomin; TDS	67-16-3	CC(N(Cc1c(N)nc(C)nc1)C=O)=C(CCO)SSC(CCO)=C(C)N(Cc1c(N)nc(C)nc1)C=O	C24H34N8O4S2	562.71	NMPA;PMDA		Other	Metabolism; Microbiology/virology; Proteases/Proteasome	Endogenous Metabolite; HIV Protease	Endogenous Metabolite; HIV-1	Thiamine, also known as thiamin or vitamin B1, is a vitamin found in food and manufactured as a dietary supplement and medication. Thiamine also acts as a cofactor for many centrally metabolizing enzymes.	Xiao D, Meng FH, Dai W, Yong Z, Liu JQ, Zhou XB, Li S. Design, Synthesis and Biological Evaluation of Brain-Targeted Thiamine Disulfide Prodrugs of Ampakine Compound LCX001. Molecules. 2016 Apr 14;21(4):488. doi: 10.3390/molecules21040488. PubMed PMID: 27089316.
T19658	Enflurane	NSC-115944; NSC 115944; NSC115944; Efrane; Ethrane	13838-16-9	FC(C(OC(F)F)(F)F)Cl	C3H2ClF5O	184.49	FDA		Others	Others	Others	Others	Enflurane, a volatile anaesthetic, is a potent inhibitor of high conductance Ca2+-activated K+ channels of Chara australis. Enflurane is an internal standard in monitoring halogenated volatile anaesthetics by headspace gas chromatography-mass spectrometry. It allows rapid adjustments of anesthesia depth with little change in pulse or respiratory rate.	Andrade LA, Silla JM, Stephens SL, Marat K, da Cunha EF, Ramalho TC, van Wijngaarden J, Freitas MP. Conformational Exploration of Enflurane in Solution and in a Biological Environment. J Phys Chem A. 2015 Oct 29;119(43):10735-42. doi: 10.1021/acs.jpca.5b08087. Epub 2015 Oct 19. PubMed PMID: 26461140.
T19680	Zotepine		26615-21-4	CN(C)CCOC1=Cc(cccc2)c2Sc(cc2)c1cc2Cl	C18H18ClNOS	331.86	PMDA		nervous system	GPCR/G Protein; Immunology/Inflammation; Neuroscience	5-HT Receptor; Adrenergic Receptor; Dopamine Receptor; Histamine Receptor	5-HT2A; 5-HT2C; D2; H1 receptor; α1-adrenergic receptor	Zotepine, an antipsychotic agent, is a potent antagonist of 5-HT2A, 5-HT2C, Histamine H1, α1-adrenergic, and Dopamine D2 receptors, with Kds of 2.6 nM, 3.2 nM, 3.3 nM, 7.3 nM, and 8 nM, respectively. Zotepine is a second-generation antipsychotic with a primary use as a treatment for schizophrenia, although clinical trials have been conducted into its efficacy as an antimanic agent in patients wit…	Chan HY, Lin AS, Chen KP, Cheng JS, Chen YY, Tsai CJ. An open-label, randomized, controlled trial of zotepine and risperidone for acutely ill, hospitalized, schizophrenic patients with symptoms of agitation. J Clin Psychopharmacol. 2013 Dec;33(6):747-52. doi: 10.1097/JCP.0b013e31829e8168. PubMed PMID: 24100785.
T20731	Brilliant blue G-250	Brilliant Blue G; BBG; Acid blue 90, Coomassie Brilliant Blue G	6104-58-1	O=S(C1=CC=CC(CN(CC)C2=CC=C(/C(C3=CC=C(NC4=CC=C(OCC)C=C4)C=C3)=C5C(C)=C/C(C=C/5)=[N+](CC)\CC6=CC=CC(S(=O)([O-])=O)=C6)C(C)=C2)=C1)([O-])=O.[Na+]	C47H48N3NaO7S2	854.02	FDA		Others	Neuroscience	P2 Receptor	P2X7	Brilliant Blue G is an antagonist of the P2X7 purinergic receptor.	Ferreira LG, Faria RX, Ferreira NC, Soares-Bezerra RJ. Brilliant Blue Dyes in Daily Food: How Could Purinergic System Be Affected? Int J Food Sci. 2016;2016:7548498. Epub 2016 Oct 19. Review. PubMed PMID: 27833914; PubMed Central PMCID: PMC5090090.
T22367	Methylprednisolone succinate	Methylprednisolone hydrogen succinate; Methylprednisolone hemisuccinate	2921-57-5	C[C@@H](C[C@@H]([C@H](CC1)[C@](C)(C[C@@H]2O)[C@]1(C(COC(CCC(O)=O)=O)=O)O)[C@H]2[C@@]1(C)C=C2)C1=CC2=O	C26H34O8	474.54	FDA		Other	Endocrinology/Hormones	Glucocorticoid Receptor	Glucocorticoid Receptor	Methylprednisolone succinate is a synthetic glucocorticoid and is widely used as an anti-inflammatory agent.
T17002	Tazemetostat hydrobromide	EPZ-6438 hydrobromide; E-7438 hydrobromide	1467052-75-0	O=C(C1=CC(C2=CC=C(CN3CCOCC3)C=C2)=CC(N(CC)C4CCOCC4)=C1C)NCC5=C(C)C=C(C)NC5=O.[H]Br	C34H45BrN4O4	653.65	FDA		cancer	Chromatin/Epigenetic	Histone Methyltransferase	EZH1; EZH2; EZH2 WT	Tazemetostat hydrobromide is a potent and selective EZH2 inhibitor. Tazemetostat hydrobromide inhibits the activity of human polycomb repressive complex 2 (PRC2)-containing wild-type EZH2 (Ki: 2.5 nM). Tazemetostat hydrobromide also inhibits EZH1 (IC50: 392 nM).	Knutson SK, et al. Durable tumor regression in genetically altered malignant rhabdoid tumors by inhibition of methyltransferaseEZH2. Proc Natl Acad Sci U S A. 2013 May 7;110(19):7922-7.
T15577	Indobufen	Ibustrin	63610-08-2	CCC(C(O)=O)c(cc1)ccc1N(Cc1c2cccc1)C2=O	C18H17NO3	295.33	NMPA		Cardiovascular system	Immunology/Inflammation; Neuroscience	COX	COX	Indobufen is an inhibitor of platelet aggregation and is a reversible platelet cyclooxygenase (Cox) activity inhibitor. Indobufen suppresses thromboxane A2 (TxA2) synthesis. Indobufen down-regulates tissue factor (TF) in monocytes.	Eligini S, et al. Indobufen inhibits tissue factor in human monocytes through a thromboxane-mediated mechanism. Cardiovasc Res. 2006 Jan;69(1):218-26.
T12594	Pyrotinib dimaleate	SHR-1258 dimaleate	1397922-61-0	O=C(NC1=C(OCC)C=C2N=CC(C#N)=C(NC3=CC=C(OCC4=NC=CC=C4)C(Cl)=C3)C2=C1)/C=C/[C@@H]5N(C)CCC5.O=C(O)/C=C\C(O)=O.O=C(O)/C=C\C(O)=O	C40H39ClN6O11	815.22	NMPA		cancer	Angiogenesis; JAK/STAT signaling; Tyrosine Kinase/Adaptors	EGFR; HER	EGFR; HER2	Pyrotinib dimaleate is a potent and selective dual inhibitor of EGFR/HER2 with IC50s of 13 and 38 nM, respectively.	Li X, et al. Discovery and development of Pyrotinib: A novel irreversible EGFR/HER2 dual tyrosine kinase inhibitor with favorable safety profiles for the treatment of breast cancer. Eur J Pharm Sci. 2017 Jan 21. pii: S0928-0987(17)30043-X.
T6430L	Calcifediol monohydrate	25-hydroxy Vitamin D3 monohydrate	63283-36-3	CC(C)(O)CCC[C@@H](C)[C@H]([C@]1(CCC/2)C)CC[C@@]1([H])C2=C\C=C3C[C@H](O)CCC\3=C.[H]O[H]	C27H46O3	418.65	FDA		Endocrine system	Metabolism	Endogenous Metabolite; Vitamin	Endogenous Metabolite; VD	Calcifediol monohydrate, the main circulating metabolite of vitamin D3, is a potent VDR inhibitor.	Castoldi A, et al. Calcifediol-loaded liposomes for local treatment of pulmonary bacterial infections. Eur J Pharm Biopharm. 2016 Nov 22.
T9419	Fesoterodine	(R) Fesoterodine	286930-02-7	CC(C)C(Oc1c([C@H](CCN(C(C)C)C(C)C)c2ccccc2)cc(CO)cc1)=O	C26H37NO3	411.58	FDA		Urinary diseases	Neuroscience	AChR	M1 mAChR; M2 mAChR; M3 mAChR; M4 mAChR; M5 mAChR	Fesoterodine is an orally active, competitive mAChR antagonist with pKi values of 8.0, 7.7, 7.4, 7.3, 7.5 for M1, M2, M3, M4, M5 receptors, respectively. It is used for the overactive bladder (OAB).	1. B Malhotra, et al.The design and development of fesoterodine as a prodrug of 5-hydroxymethyl tolterodine (5-HMT), the active metabolite of tolterodine.Curr Med Chem_x000D_ . 2009;16(33):4481-9.
T9352	hydrocotarnine		550-10-7	CN(CC1)Cc2c1cc1OCOc1c2OC	C12H15NO3	221.25	PMDA;NMPA		nervous system	Others	Others	Cbl	hydrocotarnine is an inhibitor of Cbl.	Lin H C , Chen Y J , Wei Y H , et al. Cbl Negatively Regulates NLRP3 Inflammasome Activation through GLUT1-Dependent Glycolysis Inhibition[J]. International Journal of Molecular Sciences, 21(14).
T13923	Thiamine nitrate	Vitamin B1 nitrate	532-43-4	CC1=C(CCO)SC=[N+]1CC2=CN=C(C)N=C2N.[O-][N+]([O-])=O	C12H17N5O4S	327.36	FDA;PMDA;NMPA		Metabolism	Others	Others	Others	Thiamine nitrate is an essential vitamin, and can enhance normal neuronal actives.	Kenneth Osiezagha, et al.Thiamine Deficiency and Delirium. Innov Clin Neurosci. 2013 Apr; 10(4): 26-32.
T19470	Nandrolone propionate		7207-92-3	C[C@@]12[C@](CC[C@@H]2OC(CC)=O)([H])[C@@]3([H])[C@]([C@]4([H])C(CC3)=CC(CC4)=O)([H])CC1	C21H30O3	330.46	FDA;NMPA		Endocrine system	Endocrinology/Hormones	Androgen Receptor	Androgen Receptor	Nandrolone propionate is an anabolic steroid action primarily consisting of androgenic and nitrogen-retentive properties.	Lydén E, et al. Effects of nandrolone propionate on experimental tumor growth and cancer cachexia. Metabolism. 1995 Apr;44(4):445-51.
T12095	Monomethyl fumarate		2756-87-8	O=C(OC)/C=C/C(O)=O	C5H6O4	130.1	FDA		nervous system	Endocrinology/Hormones; GPCR/G Protein; Metabolism	Drug Metabolite; GPR	Drug Metabolite; GPR109A	Monomethyl fumarate is a potent agonist of GPR109A .	Tang H, et al. The psoriasis drug monomethylfumarate is a potent nicotinic acid receptor agonist. Biochem Biophys Res Commun. 2008 Oct 31;375(4):562-5.
T50005	Sertaconazole		99592-32-2	Clc1cc(Cl)c(C(Cn2cncc2)OCc2csc3c2cccc3Cl)cc1	C20H15Cl3N2OS	437.77	FDA; NMPA		infection	Microbiology/virology	Antifungal	Antifungal	Sertaconazole is a broad-spectrum antifungal.	Croxtall JD, Plosker GL. Sertaconazole: a review of its use in the management of superficial mycoses in dermatology and gynaecology. Drugs. 2009;69(3):339-59.
T50025	Lonazolac		53808-88-1	OC(Cc1cn(-c2ccccc2)nc1-c(cc1)ccc1Cl)=O	C17H13ClN2O2	312.75	MHRA		Inflammation	DNA Damage/DNA Repair; Metabolism	PPAR	human PPARγ	Lonazolac is a nonsteroidal anti-inflammatory drug[1].	Huber R, Zech K, Dittmann EC, Lühmann R, Petitet A. Pharmakokinetik des Antirheumatikums Lonazolac-Ca beim Menschen [Pharmacokinetics of the antirheumatic lonazolac-Ca in humans]. Arzneimittelforschung. 1990 Aug;40(8):918-25. German.
T50026	Aquacycline		423769-22-6	O=C(C1=C(O)[C@@H](N(C)C)C([C@@H](O)C2C(C(C3=C(O)C=CC=C3[C@]2(O)C)=O)=C4O)[C@@]4(O)C1=O)N.[H]Cl	C22H25ClN2O9	496.89	FDA; NMPA; PMDA		infection	Microbiology/virology	HSV	HSV-1	Oxytetracycline (OTC) is a broad-spectrum antibiotic that acts by inhibiting protein synthesis in bacteria. Oxytetracycline prevents the binding from aminoacil-tRNA to the complex m-ribosomal RNA. Oxytetracycline also possesses anti-HSV-1 activity[1][2][3].	Elia, A.C, et al. Transferability of oxytetracycline (OTC) from feed to carp muscle and evaluation of the antibiotic effects on antioxidant systems in liver and kidney. Fish Physiol Biochem, 2014.
T22245	Arformoterol Tartrate	(R,R)-Formoterol tartrate	200815-49-2	O=CNC1=CC([C@@H](O)CN[C@H](C)CC2=CC=C(OC)C=C2)=CC=C1O.O=C(O)[C@H](O)[C@@H](O)C(O)=O	C23H30N2O10	494.49	FDA		Respiratory system	GPCR/G Protein; Neuroscience	Adrenergic Receptor	β2-adrenergic receptor	Arformoterol Tartrate is the tartrate salt of arformoterol. Arformoterol is a long-acting beta-2 adrenergic agonist with bronchodilator activity[2].	Pahwa R , Soni V , Sharma P C , et al. Arformoterol Tartrate: A Review of Pharmacology, Analysis and Clinical Studies[J]. Tropical Journal of Pharmaceutical Research, 2011, 9(6).
T20344	Acetylcholine bromide		66-23-9	C[N+](C)(CCOC(C)=O)C.[Br-]	C7H16BrNO2	226.11	FDA; PMDA		nervous system	Others	Others	Others	Acetylcholine bromide is the bromide salt of acetylcholine. It is an neurotransmitter found at neuromuscular junctions, autonomic ganglia, parasympathetic effector junctions, a subset of sympathetic effector junctions, and at many sites in the central nervous system.	Tsetlin VI. Acetylcholine and Acetylcholine Receptors: Textbook Knowledge and New Data. Biomolecules. 2020 Jun 3;10(6):852.
T20681	Estramustine	NSC89201; LEO275	2998-57-4	C[C@@]12[C@@H](O)CC[C@@]1([H])[C@]3([H])CCC4=C(C=CC(OC(N(CCCl)CCCl)=O)=C4)[C@@]3([H])CC2	C23H31Cl2NO3	440.4	FDA; PMDA		Cancer; Reproductive system	Cytoskeletal Signaling	Microtubule Associated	microtubule	Estramustine is a nitrogen mustard linked to estradiol, usually as phosphate. Estramustine has been used to treat prostatic neoplasms; also has radiation protective properties. Estramustine is selectively taken up by prostate cells and exerts antineoplastic effects by interfering with microtubule of dynamics and by reducing plasma levels of testosterone.	Perry CM, McTavish D. Estramustine phosphate sodium. A review of its pharmacodynamic and pharmacokinetic properties, and therapeutic efficacy in prostate cancer. Drugs Aging. 1995 Jul;7(1):49-74.
T22425	Sevoflurane	Fluoromethyl	28523-86-6	FCOC(C(F)(F)F)C(F)(F)F	C4H3F7O	200.05	FDA; NMPA; PMDA		nervous system	GPCR/G Protein; Neuroscience	5-HT Receptor	5-HT3	Sevoflurane, a noncompetitive inhibitor of 5-HT3 receptor, acts as a low-soluble inhalation anesthetics.	Sakai EM,et al. Pharmacotherapy. 2005 Dec;25(12):1773-88.
T22307	Diclofenac Epolamine	DHEP; DIEP; diclofenac hydroxyethylpyrrolidine	119623-66-4	OCCN1CCCC1.OC(=O)CC2=C(NC3=C(Cl)C=CC=C3Cl)C=CC=C2	C20H24Cl2N2O3	411.32	FDA; NMPA; PMDA		Inflammation	Others	Others	Others	Diclofenac Epolamine is a non-steroidal anti-inflammatory agent (NSAID) with analgesic and antipyretic actions.	Affaitati G, et al. Diclofenac epolamine topical patch for the treatment of pain. J Biol Regul Homeost Agents.
T16757	Risdiplam	RG7916; RO7034067	1825352-65-5	O=C(C=C(C(C=C1C)=NN2C1=NC(C)=C2)N=C3C=C4)N3C=C4N(CCN5)CC65CC6	C22H23N7O	401.46	FDA; EMA; PMDA		nervous system	Cell Cycle/Checkpoint; DNA Damage/DNA Repair	DNA/RNA Synthesis	DNA/RNA Synthesis; SMN2	Risdiplam (RG7916) is orally administered. Risdiplam is a centrally and peripherally distributed SMN2 pre-mRNA splicing modifier which increases survival motor neuron (SMN) protein levels[1].	Poirier A, et al. Risdiplam distributes and increases SMN protein in both the central nervous system and peripheral organs. Pharmacol Res Perspect. 2018 Nov 29;6(6):e00447.
T11836	Lefamulin acetate	BC-3781 acetate	1350636-82-6	CC(O)=O.C[C@@H]1C23[C@](C(CC3)=O)([H])C([C@H](OC(CS[C@H]4[C@@H](C[C@H](N)CC4)O)=O)C[C@](C=C)(C)[C@H]1O)([C@H](C)CC2)C	C30H49NO7S	567.78	FDA; EMA		Respiratory system	Microbiology/virology	Antibacterial; Antibiotic; ribosome	50S ribosome; Antibiotic; Bacterial	Lefamulin acetate (BC-3781 acetate) is the first semi-synthetic pleuromutilin for systemic treatment of bacterial infections in humans. Lefamulin acetate (BC-3781 acetate) inhibits protein synthesis by binding to the peptidyl transferase center of the 50S bacterial ribosome, preventing the binding of transfer RNA for peptide transfer. Lefamulin acetate (BC-3781 acetate) is an orally active antibi…	Veve MP, et al. Lefamulin: Review of a Promising Novel Pleuromutilin Antibiotic. Pharmacotherapy. 2018 Sep;38(9):935-946. doi: 10.1002/phar.2166. Epub 2018 Aug 20.
T21651	Lansoprazole sodium	Lansoprazole (sodium); AG-1749 sodium	226904-00-3	O=S(C1=NC2=CC=CC=C2[N-]1)CC3=NC=CC(OCC(F)(F)F)=C3C.[Na+]	C16H13F3N3NaO2S	391.34	FDA;NMPA;PMDA		Digestive system	Membrane transporter/Ion channel; Metabolism; Microbiology/virology	Antibacterial; Phospholipase; Proton pump	Bacterial; Phospholipase; Proton Pump	Lansoprazole sodium is a proton pump inhibitor (PPI) and a potent inhibitor of gastric acidity which is widely used in the therapy of gastroesophageal reflux and peptic ulcer disease.	Kokufu T , Ihara N , Sugioka N , et al. Effects of lansoprazole on pharmacokinetics and metabolism of theophylline[J]. European Journal of Clinical Pharmacology, 1995, 48(5):391-5.
T0331L	Moxifloxacin	Avelox; Moxeza	151096-09-2	COc(c(N1C[C@H]2NCCC[C@H]2C1)c(cc12)F)c2N(C2CC2)C=C(C(O)=O)C1=O	C21H24FN3O4	401.43	FDA;PMDA;PMDA		infection	Microbiology/virology	Antibacterial; Antibiotic	Antibiotic; Bacterial	Moxifloxacin is a fourth-generation fluoroquinolone that has been shown to be effective against Gram-positive, Gram-negative, and atypical strains, as well as multi-drug resistant Streptococcus pneumoniae.	Miravitlles M , Anzueto A . Moxifloxacin: a respiratory fluoroquinolone[J]. Expert Opinion on Pharmacotherapy, 2015, 9(10):1755-72.
T9319	Tosufloxacin	Ozex; tosufloxacin tosilate	108138-46-1	NC1CN(C2=C(F)C=C3C(C(C(O)=O)=CN(C4=C(F)C=C(F)C=C4)C3=N2)=O)CC1	C19H15F3N4O3	404.34	PMDA;PMDA		infection	Others	Others	Others	Tosufloxacin is a quinolone antimicrobial agent and potent inhibitor of the metabolism of theophylline.	Yamaguchi K . Evaluation of in-vitro and in-vivo antibacterial activity of tosufloxacin tosilate[J]. Journal of Infection & Chemotherapy, 2001, 7(4):205-217.
T25180	Bromodiphenhydramine hydrochloride		1808-12-4	C[NH+](CCOC(C1=CC=C(Br)C=C1)C2=CC=CC=C2)C.[Cl-]	C17H21BrClNO	370.71	FDA		Inflammation	Others	Others	Others	Bromodiphenhydramine hydrochloride is a new antihistaminic in the control of cutaneous.	Maclaren W R , Bruff W C , Eisenberg B C , et al. A clinical comparison of carbinoxamine maleate, tripelennamine hydrochloride, and bromodiphenhydramine hydrochloride in treating allergic symptoms.[J]. Ann Allergy, 1955, 13(13):307-312.
T21299	Zoledronic acid monohydrate	Zoledronic acid hydrate; CGP 42446; CGP42446A; ZOL 446; zoledronate; zoledronate	165800-06-6	OC(P(O)(O)=O)(P(O)(O)=O)CN1C=CN=C1.[H]O[H]	C5H12N2O8P2	290.1	FDA;EMA;PMDA;PMDA		cancer;others	Apoptosis; Autophagy	Apoptosis; Autophagy	Apoptosis; Autophagy	Zoledronic acid hydrate is a synthetic imidazole bisphosphonate analog with anti-bone-resorption activity.	Albani-Campanario M , G Buendía-Díaz, Flores-Islas M , et al. [Zoledronic acid-based uveitis: a case report and a bibliography review][J]. Ginecología Y Obstetricia De México, 2012, 80(5):355-9.
T20993	Memantine		19982-08-2	C1[C@@]2(CC3(CC(C2)C[C@@]1(C3)C)N)C	C12H21N	179.3	FDA;EMA;PMDA;PMDA		nervous system	Others	Others	Others	Memantine, an amantadine derivative with some dopaminergic effects, has been proposed as an antiparkinson agent and has may be used to treat moderate to severe Alzheimer's disease. It acts on the glutamatergic system by blocking NMDA receptors.	Chen R, Chan PT, Chu H, Lin YC, Chang PC, Chen CY, Chou KR. Treatment effects between monotherapy of donepezil versus combination with memantine for Alzheimer disease: A meta-analysis. PLoS One. 2017 Aug 21;12(8):e0183586.
T22417	Rutin hydrate	Quercetin-3-O-rutinoside; Rutoside; Sophorin	207671-50-9	CC1OC(OCC2OC(OC3=C(OC4=C(C(=CC(=C4)O)O)C3=O)C5=CC(=C(O)C=C5)O)C(O)C(O)C2O)C(O)C(O)C1O	C27H30O16	610.52	NMPA		Others	Autophagy; Neuroscience	Autophagy; Beta Amyloid	Amyloid-β; Autophagy	Rutin hydrate, a kind of glycoside, widely exists in many plants including citrus fruit.	Mostafa D G , Khaleel E F , Badi R M , et al. Rutin hydrate inhibits apoptosis in the brains of cadmium chloride-treated rats via preserving the mitochondrial integrity and inhibiting endoplasmic reticulum stress[J]. Neurological Research, 2019:1-15.
T22324	Ensartinib hydrochloride	Ensartinib dihydrochloride; X-396 dihydrochloride	2137030-98-7	Cl.Cl.CC1CN(CC(C)N1)C(=O)C2=CC=C(NC(=O)C3=NN=C(N)C(=C3)OC(C)C4=C(Cl)C(=CC=C4Cl)F)C=C2	C26H29Cl4FN6O3	634.36	NMPA		Cancer	Angiogenesis; Tyrosine Kinase/Adaptors	ALK; c-Met/HGFR; Trk receptor	ALK; ALK variants; c-Met/HGFR; GOPC-ROS1; TPM3-TRKA; TRKC	Ensartinib dihydrochloride is a potent new-generation ALK inhibitor with high activity against CNS metastases and a broad range of known crizotinib-resistant ALK mutations. It potently inhibits both wild-type ALK and ALK variants (C1156Y, F1174, G1202R, L1196M, S1206R, and T1151 mutants) with in vitro IC50s of <4 nM.	Li T, et al. Chin Clin Oncol. 2019, 8(S1):S4.
T8947	dasiglucagon acetate	dasiglucagon acetate(1544300-84-6 free base)	T8947	CC(C[C@@H](C(N[C@H](C(N[C@H](C(N[C@H](C(O)=O)[C@H](O)C)=O)CO)=O)CCC(O)=O)=O)NC([C@@H](NC([C@@H](NC([C@H](C(C)C)NC([C@@H](NC([C@@H](NC([C@@H](NC([C@@H](NC([C@@H](NC([C@@H](NC(C(C)(NC([C@@H](NC([C@@H](NC([C@@H](NC([C@@H](NC([C@@H](NC([C@@H](NC([C@@H](NC([C@@H](NC([C@H]([C@H](O)C)NC([C@@H](NC([C@H]([C@H](O)C)NC(CNC([C@@H](NC([C@@H](NC([C@H](Cc1nc[nH]c1)N)=O)CO)=O)CCC(N)=O)=O)=O)=O)Cc2ccccc2)=O)=O)CO…	C154H226N38O52	3441.67	FDA		Endocrine system	Others	Others	Others	Dasiglucagon acetate is a novel glucagon analog for diabetic hypoglycemia therapy. Dasiglucagon acetate has demonstrated established solubility and stability in an aqueous formulation. Pharmacokinetics studies have shown dasiglucagon acetate to exhibit higher absorption and a longer plasma elimination half-life than traditional reconstituted glucagon.	Li S, et al. Evaluating dasiglucagon as a treatment option for hypoglycemia in diabetes. Expert Opin Pharmacother. 2020 Aug;21(11):1311-1318.
T4998L	Cefpodoxime (free acid)		80210-62-4	COCC(CS[C@@H]1[C@@H]2NC(/C(/c3csc(N)n3)=N\OC)=O)=C(C(O)=O)N1C2=O	C15H17N5O6S2	427.45	FDA; NMPA; PMDA		infection	Others	Others	Others	Cefpodoxime (free acid) is an oral, third-generation cephalosporin antibiotic. It is active against most Gram-positive and Gram-negative organisms, except Pseudomonas aeruginosa, Enterococcus, and Bacteroides fragilis.	Mostafa GAE, Al-Otaibi YH, Al-Badr AA. Cefpodoxime proxetil. Profiles Drug Subst Excip Relat Methodol. 2019;44:1-165.
T10441	Azosemide		27589-33-9	ClC1=CC(NCC2=CC=CS2)=C(C3=NN=NN3)C=C1S(N)(=O)=O	C12H11ClN6O2S2	370.84	PMDA		Others; Cardiovascular system	Membrane transporter/Ion channel	Na-K-Cl cotransporter	Na-K-Cl cotransporter	Azosemide is a potent NKCC1 inhibitor (IC50s: 0.246 µM and 0.197 µM for hNKCC1A and NKCC1B).	Hampel P, et al. Azosemide is more potent than bumetanide and various other loop diuretics to inhibit the sodium-potassium-chloride-cotransporter human variants hNKCC1A and hNKCC1B. Sci Rep. 2018 Jun 29;8(1):9877.
T12607	Quinupristin		120138-50-3	O=C([C@](N(C([C@@](CCC1)([H])N1C([C@H](NC2=O)CC)=O)=O)C)([H])CC3=CC=C(N(C)C)C=C3)N(C[C@@H](CS[C@H]4C(CC5)CCN5C4)C6=O)[C@](C6)([H])C(N[C@@H](C7=CC=CC=C7)C(O[C@@H]([C@@H]2NC(C(N=CC=C8)=C8O)=O)C)=O)=O	C53H67N9O10S	1022.22	FDA		infection	Microbiology/virology	Antibacterial; Antibiotic	Antibiotic; Bacterial	Quinupristin is a streptogramin antibiotic. Quinupristin blocks peptide bond synthesis to prevent the extension of polypeptide chains and promote the detachment of incomplete protein chains in the bacterial ribosomal subunits[1] [2].	Gurk-Turner C. Quinupristin/dalfopristin: the first available macrolide-lincosamide-streptogramin antibiotic. Proc (Bayl Univ Med Cent). 2000 Jan;13(1):83-6.
T14345	Atropine methyl bromide	Methylatropine bromide	2870-71-5	C[N+]1([C@H]2C[C@H](OC(C(C3=CC=CC=C3)CO)=O)C[C@@H]1CC2)C.[Br-]	C18H26BrNO3	384.31	NMPA		Others	Neuroscience	AChR	mAChR	Atropine methyl bromide, a muscarinic receptor (mAChR) antagonist. Which is a quaternary ammonium salt of atropine and a mydriatic for dilation of the pupil during ophthalmic examination. It penetrates less readily into the central nervous system than atropine[1][2]. It is introduced for relieving pyloric spasm in infants for its highly polar nature.	Methylatropine.
T11043	Dihydroergocristine mesylate	DHEC (mesylate)	24730-10-7	O[C@@]([C@@](CCC1)([H])N1C2=O)(O[C@](NC([C@@H](CN(C)[C@]3([H])C4)C[C@]3([H])C5=C6C4=CNC6=CC=C5)=O)(C(C)C)C7=O)N7[C@H]2CC8=CC=CC=C8.CS(=O)(O)=O	C36H45N5O8S	707.84	USA;Brazil		Others	Neuroscience	Beta Amyloid	amyloid-β	Dihydroergocristine mesylate(DHEC mesylate) is the methanesulfonic acid salt of dihydroergocristine. It has been used as the for the symptomatic treatment of mental deterioration associated with cerebrovascular insufficiency and in peripheral vascular disease. Dihydroergocristine mesylate is a inhibitor of γ-secretase (GSI), , reduces the production of the Alzheimer's disease amyloid-β peptides, …	Lei X, et al. The FDA-approved natural product dihydroergocristine reduces the production of the Alzheimer's disease amyloid-β peptides. Sci Rep. 2015 Nov 16;5:16541.
T22240	Amitriptyline		50-48-6	CN(C)CCC=C(c1c(CC2)cccc1)c1c2cccc1	C20H23N	277.4	FDA; NMPA; PMDA		nervous system	GPCR/G Protein; Immunology/Inflammation; Neuroscience	5-HT Receptor; Histamine Receptor; Norepinephrine; Sigma receptor	5-HT2; H1 receptor; H4 receptor; norepinephrine transporter (NET); SERT; σ1	Amitriptyline (MK-230, N-750, Ro41575) is a tricyclic antidepressant (TCA) with analgesic properties. Amitriptyline is widely used to treat depression and neuropathic pain.	Juliano R L , Daoud S S . Liposomes as a delivery system for membrane-active antitumor drugs[J]. Journal of Controlled Release, 1990, 11(1-3):225-232.
T8147	Solifenacin	YM905 free base	242478-37-1	O=C(N(CC1)[C@@H](c2ccccc2)c2c1cccc2)O[C@@H]1C(CC2)CCN2C1	C23H26N2O2	362.46	FDA; NMPA; PMDA		Urinary system	Neuroscience	AChR	mAChR; muscarinic receptor	Solifenacin (YM905 free base) is a novel muscarinic receptor antagonist, its pKis for M1, M2 and M3 receptors is of 7.6, 6.9 and 8.0, respectively.	Ikeda K, et al. M(3) receptor antagonism by the novel antimuscarinic agent solifenacin in the urinary bladder and salivary gland. Naunyn Schmiedebergs Arch Pharmacol. 2002 Aug;366(2):97-103.
T21957	Guanabenz hydrochloride	NE56490	23113-43-1	ClC1=C(C=NNC(N)=N)C(Cl)=CC=C1.[H]Cl	C8H9Cl3N4	267.54	FDA; PMDA		Cardiovascular system	GPCR/G Protein; Neuroscience	Adrenergic Receptor	α2-adrenoceptor	Guanabenz hydrochloride is an orally active α2-adrenoceptor agonist with hypotensive effects.	Holmes B, Brogden RN, Heel RC, Speight TM, Avery GS. Guanabenz. A review of its pharmacodynamic properties and therapeutic efficacy in hypertension. Drugs. 1983 Sep;26(3):212-29. d
T9287	Hydroxychloroquine		118-42-3	CCN(CCCC(C)Nc1c(ccc(Cl)c2)c2ncc1)CCO	C18H26ClN3O	335.87	FDA; NMPA; PMDA		Immune system	Autophagy; Immunology/Inflammation; Microbiology/virology	Autophagy; Parasite; SARS-CoV; TLR	Autophagy; Parasite; SARS-CoV; TLR; TLR7; TLR9	Hydroxychloroquine (HCQ) is an alkalinizing lysosomatropic drug that acts by inducing apoptosis of renal cancer cells in vitro and inhibiting TLR7/9. It is a medication used to prevent and treat malaria, and it's also being studied as an experimental treatment for COVID-19.	Ponticelli C, Moroni G. Hydroxychloroquine in systemic lupus erythematosus (SLE). Expert Opin Drug Saf. 2017 Mar;16(3):411-419.
T21434	Sulfacetamide	Sulphacetamide; Acetosulfamine	144-80-9	CC(NS(c(cc1)ccc1N)(=O)=O)=O	C8H10N2O3S	214.24	FDA; NMPA		Inflammation	Microbiology/virology	Antibacterial; Antibiotic	Antibiotic; Bacterial	Sulfacetamide is used to treat blepharitis or conjunctivitis (in eye-drop solution) by limiting the presence of folic acid which bacteria need to survive. sulfacetamide may serve as a treatment for mild forms of hidradenitis suppurativa. It is also used to control acne.	Bartlett KB, Davis SA, Feldman SR. Tolerability of topical antimicrobials in treatment of acne vulgaris. J Drugs Dermatol. 2014 Jun;13(6):658-62. Review. PubMed PMID: 24918554.
T22442	Trazodone	Desyrel	19794-93-5	O=C1N(C=CC=C2)C2=NN1CCCN(CC1)CCN1c1cccc(Cl)c1	C19H22ClN5O	371.86	FDA; NMPA; PMDA		nervous system	GPCR/G Protein; Neuroscience	5-HT Receptor	serotonin reuptake	Trazodone, a 5-HT 2A/2C receptor antagonist, is used as an antidepressant for treating major anxiety disorders and depressive disorder.	Fagiolini A , Comandini A , Kasper S . Rediscovering Trazodone for the Treatment of Major Depressive Disorder[J]. Cns Drugs, 2013, 27(8):677-677.
T22369	Midodrine	(±)-Midodrin	42794-76-3	COc(cc1)cc(C(CNC(CN)=O)O)c1OC	C12H18N2O4	254.28	FDA; NMPA; PMDA		Cardiovascular system	GPCR/G Protein; Neuroscience	Adrenergic Receptor	α1-adrenoceptor	Midodrine, an adrenergic alpha-1 agonist, belongs to the class of medications known as vasopressors.	Tchen B S , Jbsbb B . Clinical utility of midodrine and methylene blue as catecholamine-sparing agents in intensive care unit patients with shock - ScienceDirect[J]. Journal of Critical Care, 2020, 57:148-156.
T21439	Tacrine	CS 12602; Tacrinum	321-64-2	NC1=C(CCCC2)C2=NC3=CC=CC=C31	C13H14N2	198.26	FDA		Nervous system	Neuroscience	AChR	Cholinergic	Tacrine is an indirect cholinergic agonist and centrally acting anticholinesterase. It is approved for the treatment of Alzheimer's disease.	Ismaili L, Refouvelet B, Benchekroun M, Brogi S, Brindisi M, Gemma S, Campiani G, Filipic S, Agbaba D, Esteban G, Unzeta M, Nikolic K, Butini S, Marco-Contelles J. Multitarget compounds bearing tacrine- and donepezil-like structural and functional motifs for the potential treatment of Alzheimer's disease. Prog Neurobiol. 2016 Jan 18. pii: S0301-0082(15)00162-8. doi: 10.1016/j.pneurobio.2015.12.00…
T22406	Prazosin	Furazosin; Prazosine; Prazocin	19216-56-9	COc(cc1c(N)nc(N(CC2)CCN2C(c2ccco2)=O)nc1c1)c1OC	C19H21N5O4	383.4	FDA		Cardiovascular system	GPCR/G Protein; Neuroscience	Adrenergic Receptor	Adrenergic Receptor; α1-adrenergic receptor	Prazosin, an α1-blocker, acts as an inverse agonist at alpha-1 adrenergic receptors and is used to treat hypertension.	Mindi Zhao, et al. PLoS One. 2016, 11(10): e0164796.
T15160	Dotinurad	(3,5-dichloro-4-hydroxyphenyl)(1,1-dioxidobenzo[d]thiazol-3(2H)-yl)methanone	1285572-51-1	Oc(c(Cl)cc(C(N(C1)c(cccc2)c2S1(=O)=O)=O)c1)c1Cl	C14H9Cl2NO4S	358.2	PMDA		Urinary system	Membrane transporter/Ion channel	OAT	URAT1	Dotinurad is a potent agent of uricosuric (IC50: 3.6 µM for uric acid).	Li X, et al. Pharmacological urate-lowering approaches in chronic kidney disease. Eur J Med Chem. 2019 Mar 15;166:186-196.
T9284	Dexketoprofen trometamol		156604-79-4	O=C(C1=CC=CC([C@H](C)C(O)=O)=C1)C2=CC=CC=C2.OCC(CO)(CO)N	C20H25NO6	375.42	NMPA		Inflammation	Immunology/Inflammation; Neuroscience	COX	COX-2	Dexketoprofen trometamol is a modified non-selective COX inhibitor with a rapid onset of action that is available as both oral and parenteral formulations.	Hanna M , Moon J Y . A review of dexketoprofen trometamol in acute pain[J]. Current Medical Research and Opinion, 2018:1-32.
T21412	Ketorolac	RS37619; Toradol; Acular; Sprix; Macril; Acuvail	74103-06-3	O=C(C1C2=CC=C(C(C3=CC=CC=C3)=O)N2CC1)O	C15H13NO3	255.27	FDA		other	Immunology/Inflammation; Neuroscience	COX	COX; COX-1; COX-2	Ketorolac is a non-steroidal anti-inflammatory drug (NSAID) in the family of heterocyclic acetic acid derivatives. It acts by inhibiting the bodily synthesis of prostaglandins.	Lawuyi LE, Gurbaxani A. The clinical utility of new combination phenylephrine/ketorolac injection in cataract surgery. Clin Ophthalmol. 2015 Jul 10;9:1249-54. doi: 10.2147/OPTH.S72321. eCollection 2015. Review. PubMed PMID: 26203214; PubMed Central PMCID: PMC4506037.
T15571	Imrecoxib	BAP-909	395683-14-4	O=C1N(CCC)CC(C2=CC=C(S(=O)(C)=O)C=C2)=C1C3=CC=C(C)C=C3	C21H23NO3S	369.48	NMPA		Inflammation	Immunology/Inflammation; Neuroscience	COX	COX; COX-1; COX-2	Imrecoxib is a novel and selective cyclooxygenase 2 (COX-2) inhibitor (IC50: 18 nM). It also inhibits COX1- activity (IC50: 115 nM). Imrecoxib has an anti-inflammatory effect.	Chen XH, et al. Imrecoxib: a novel and selective cyclooxygenase 2 inhibitor with anti-inflammatory effect. Acta Pharmacol Sin. 2004 Jul;25(7):927-31.
T14981	Clobetasone butyrate		25122-57-0	C[C@@]1(C2)[C@](C(CCl)=O)(OC(CCC)=O)[C@@H](C)C[C@@]1([H])[C@]3([H])CCC4=CC(C=C[C@]4(C)[C@@]3(F)C2=O)=O	C26H32ClFO5	478.98	PMDA; PMDA		Immune system; Inflammation	Endocrinology/Hormones	Glucocorticoid Receptor	Glucocorticoid Receptor	Clobetasone butyrate can be used to relieve corticosteroid-responsive dermatoses, including atopic dermatitis and psoriasis. Clobetasone butyrate is a synthetic glucocorticoid. It has topical anti-inflammatory activity especially in skin .	Munro DD, et al. Clobetasone butyrate, a new topical corticosteroid: clinical activity and effects on pituitary-adrenal axis function and model of epidermal atrophy.
T12311	Tirabrutinib hydrochloride	ONO-4059 (hydrochloride); GS-4059 (hydrochloride)	1439901-97-9	O=C1N(C2=CC=C(OC3=CC=CC=C3)C=C2)C4=C(N)N=CN=C4N1[C@H]5CN(C(C#CC)=O)CC5.[H]Cl	C25H23ClN6O3	490.94	PMDA		Cancer; Immune system	Angiogenesis; Tyrosine Kinase/Adaptors	BTK	BTK	Tirabrutinib hydrochloride is a selective and novelBTK with IC50 2.2 nm inhibitor.	Akintunde Akinleye et al. Ibrutinib and novel BTK inhibitors in clinical development. J Hematol Oncol, 2013, 6: 59.
T9171	Methenolone enanthate		303-42-4	CCCCCCC(O[C@@H](CC1)[C@@](C)(CC2)[C@@H]1[C@H](CC[C@H]1C3)[C@H]2[C@@]1(C)C(C)=CC3=O)=O	C27H42O3	414.62	PMDA		Endocrine system	Others	Others	Others	Methenolone enanthate is an androgen and anabolic steroid (AAS) medication which is used mainly in the treatment of anemia due to bone marrow failure.	Hussain Z, Dastagir N, Hussain S, Jabeen A, Zafar S, Malik R, Bano S, Wajid A, Choudhary MI. Aspergillus niger-mediated biotransformation of methenolone enanthate, and immunomodulatory activity of its transformed products. Steroids. 2016 Aug;112:68-73.
T9251	Fedratinib hydrochloride hydrate	TG-101348 hydrochloride hydrate; SAR 302503 hydrochloride hydrate	1374744-69-0	O=S(C1=CC=CC(NC2=NC(NC3=CC=C(OCCN4CCCC4)C=C3)=NC=C2C)=C1)(NC(C)(C)C)=O.[H]Cl.[H]Cl.[H]O[H]	C27H40Cl2N6O4S	615.61	FDA; EMA		Others	Angiogenesis; Chromatin/Epigenetic; JAK/STAT signaling; Stem Cells; Apoptosis	Apoptosis; JAK	Apoptosis; JAK; JAK2; JAK2 (V617F)	Fedratinib hydrochloride hydrate is a potent, selective, ATP-competitive and orally active JAK2 inhibitor.	Wernig G, et al. Efficacy of TG101348, a selective JAK2 inhibitor, in treatment of a murine model of JAK2V617F-induced polycythemia vera. Cancer Cell. 2008 Apr;13(4):311-20.
T20029	Buformin hydrochloride	NSC 528218; NSC-528218; NSC528218	1190-53-0	CCCCN=C(N)N=C(N)N.Cl	C6H16ClN5	193.68	PMDA		Cardiovascular system	PI3K/Akt/mTOR signaling	AMPK	AMPK	Buformin hydrochloride is a potent AMPK activator,an oral antidiabetic drug of the biguanide class. Buformin delays the absorption of glucose from the gastrointestinal tract increases insulin sensitivity and glucose uptake into cells and inhibits synthesis of glucose by the liver. Biguanides may antagonize the action of glucagon, thus reducing fasting glucose levels.	Amanda B Parris, et al. Buformin hydrochloride Inhibits the Stemness of erbB-2-overexpressing Breast Cancer Cells and Premalignant Mammary Tissues of MMTV-erbB-2 Transgenic Mice. J Exp Clin Cancer Res
T15675	Tirbanibulin Mesylate	KX2-391 Mesylate; KX01 Mesylate	1080645-95-9	O=C(NCC1=CC=CC=C1)CC2=NC=C(C3=CC=C(OCCN4CCOCC4)C=C3)C=C2.OS(=O)(C)=O	C27H33N3O6S	527.63	FDA; EMA		Others	Angiogenesis; Tyrosine Kinase/Adaptors; Cytoskeletal Signaling	Microtubule Associated; Src	Microtubule/Tubulin; Src	Tirbanibulin Mesylate is an inhibitor of Src that targets the peptide substrate site of Src (GI50: 9-60 nM in cancer cell lines).	Lau GM, et al. Expression of Src and FAK in hepatocellular carcinoma and the effect of Src inhibitors on hepatocellular carcinoma in vitro. Dig Dis Sci, 2009, 54(7), 1465-1474.
T10585	Bozitinib	PLB-1001; CBT-101	1440964-89-5	Cn1nc(cc(c(C(c2nnc(cc3)n2nc3-c2cn(C3CC3)nc2)(F)F)c2)F)c2c1	C20H15F3N8	424.38	FDA; EMA; PMPA		Others	Tyrosine Kinase/Adaptors	c-Met/HGFR	c-Met; c-Met/HGFR	Bozitinib (PLB-1001) is a highly selective inhibitor of the c-MET kinase with blood-brain barrier permeability. Bozitinib binds to the conventional ATP-binding pocket of the tyrosine kinase superfamily.	Hu H, et al. Mutational Landscape of Secondary Glioblastoma Guides MET-Targeted Trial in Brain Tumor. Cell. 2018 Nov 29;175(6):1665-1678.e18.
T15210	Elsulfavirine	Elpida; VM-1500	868046-19-9	CCC(NS(c(cc1)cc(Cl)c1NC(Cc(ccc(Br)c1Oc2cc(Cl)cc(C#N)c2)c1F)=O)(=O)=O)=O	C24H17BrCl2FN3O5S	629.28	Russia		Immune system	Microbiology/virology; Proteases/Proteasome	HIV Protease	HIV; HIV-1	Elsulfavirine is an HIV-1 infection reverse transcriptase inhibitor. It is a new anti-HIV drug.	Rai MA, et al. Emerging reverse transcriptase inhibitors for HIV-1 infection. Expert Opin Emerg Drugs. 2018 Jun;23(2):149-157.
T12489	Pimethixene	Pimetixene; Calmixen	314-03-4	CN(CC1)CCC1=C1c(cccc2)c2Sc2c1cccc2	C19H19NS	293.43	Brazil		Respiratory system	GPCR/G Protein; Immunology/Inflammation; Neuroscience	5-HT Receptor; AChR; Dopamine Receptor; Histamine Receptor	5-HT Receptor; 5-HT1A; 5-HT2A; 5-HT2B; 5-HT2C; D2; D4.4 receptor; H1 receptor; Histamine Receptor; M1 mAChR; M2 mAChR	Pimethixene is a highly potent 5-HT1A, 5-HT2A, 5-HT2B, 5-HT2C, histamine H1, dopamine D2 and D4.4 as well as muscarinic M1 and M2 receptors antagonist(pKis of 7.63, 10.22, 10.44, 8.42, 10.14, 8.19, 7.54, 8.61 and 9.38, respectively).	Schmitz B, et al. BF-1--a novel selective 5-HT2B receptor antagonist blocking neurogenic dural plasma protein extravasation in guinea pigs. Eur J Pharmacol. 2015 Mar 15;751:73-80.
TQ0223	Lusutrombopag	S-888711; Mulpleta	1110766-97-6	CCCCCCO[C@@H](C)c1cccc(-c2csc(NC(c3cc(Cl)c(/C=C(\C)/C(O)=O)c(Cl)c3)=O)n2)c1OC	C29H32Cl2N2O5S	591.55	FDA; EMA; PMDA		Others; Digestive system	Immunology/Inflammation; Proteases/Proteasome	Thrombin; Thrombopoietin Receptor	Thrombopoietin Receptor; TPO	Lusutrombopag is an orally bioavailable, small molecule thrombopoietin (TPO) receptor agonist for chronic liver disease (CLD) patients with thrombocytopenia prior to elective invasive surgery.	Kim ES, et al. Lusutrombopag: First Global Approval. Drugs. 2016 Jan;76(1):155-8.
T9234	Tocainide hydrochloride	2-amino-n-(2,6-dimethylphenyl)propanamide hydrochloride	71395-14-7	Cl.CC(N)C(=O)Nc1c(C)cccc1C	C11H17ClN2O	228.72	FDA;NMPA		Cardiovascular system	Membrane transporter/Ion channel	Sodium Channel	Sodium Channel	Tocainide hydrochloride is a sodium channel blocker. It blocks the sodium channels in the pain-producing foci in the nerve membranes.	Alpert JS, et al. Chemistry, pharmacology, antiarrhythmic efficacy and adverse effects of tocainide hydrochloride, an orally active structural analog of lidocaine. Pharmacotherapy. 1983 Nov-Dec;3(6):316-23.
T25487	Haloperidol decanoate	Haldol; Neoperidole; KD 136; KD 16; KD-136	74050-97-8	CCCCCCCCCC(OC1(CCN(CCCC(c(cc2)ccc2F)=O)CC1)c(cc1)ccc1Cl)=O	C31H41ClFNO3	530.11	FDA; PMDA; NMPA		nervous system	Others	Others	Others	Haloperidol decanoate is a typical antipsychotic agent utilized as maintenance treatment for schizophrenia and mood disorders formulated as an ester for intramuscular injection.	Jann MW, Penzak SR. Long-Acting Injectable Second-Generation Antipsychotics: An Update and Comparison Between Agents. CNS Drugs. 2018 Mar;32(3):241-257. doi: 10.1007/s40263-018-0508-6. Review. Erratum in: CNS Drugs. 2018 Jun 2;:. PubMed PMID: 29569082.
T12004	Meropenem trihydrate	SM 7338 trihydrate	119478-56-7	O=C(C(N12)=C(S[C@@H]3CN[C@H](C(N(C)C)=O)C3)[C@H](C)[C@]2([H])[C@@H]([C@H](O)C)C1=O)O.[H]O[H].[H]O[H].[H]O[H]	C17H31N3O8S	437.51	FDA; EMA; NMPA; PMDA		infection	Microbiology/virology	Antibacterial; Antibiotic	Antibiotic; Bacterial	Meropenem trihydrate with broad-spectrum antibacterial activity,is a carbapenem antibiotic.	Slaney, L., et al., In-vitro activity of meropenem against Neisseria gonorrhoeae, Haemophilus influenzae and H. ducreyi from Canada and Kenya. J Antimicrob Chemother, 1989. 24 Suppl A: p. 183-6.
T16472	Pericyazine	Propericiazine; RP 8909	2622-26-6	N#Cc(cc1)cc2c1Sc(cccc1)c1N2CCCN(CC1)CCC1O	C21H23N3OS	365.49	PMDA		nervous system	GPCR/G Protein; Neuroscience	Dopamine Receptor	D2; Dopamine	Pericyazine is a selective D2-dopamine receptor antagonist. Pericyazine is a first-generation antipsychotic drug that is used as an adjunct to the short-term management of severe anxiety states and psychosis.	Morley KC, et al. Pericyazine in the treatment of cannabis dependence in general practice: a naturalistic pilot trial. Subst Abuse Rehabil. 2012 May 28;3:43-7.
T28827	Sofpironium bromide	BBI-4000; BBI4000; BBI 4000	1628106-94-4	CCOC(C[N+](C)(CC1)C[C@@H]1OC([C@@](C2CCCC2)(C3=CC=CC=C3)O)=O)=O.[Br-]	C22H32BrNO5	470.4	PMDA		nervous system	Neuroscience	AChR	mAChR	Sofpironium bromide belongs to a class of drugs called anticholinergics, which exert their effect by blocking the action of acetylcholine.	Julia Paik, et al. Sofpironium Bromide: First Approval. Drugs. 2020 Dec;80(18):1981-1986.
T20641	Propagermanium	Dipropanoic acid germanium sequioxide; Ge 132; Ge-132; Ge132; SK 818; SK-818	12758-40-6	O=[Ge](CCC(O)=O)O[Ge](CCC(O)=O)=O	C6H10Ge2O7	339.42	PMDA		Inflammation/Infection	Others	Others	others	Propagermanium, an organometallic compound of germanium, has been used as a therapeutic agent against chronic hepatitis B in Japan.	Mizuno N, Nishibori E, Oka M, Jomori T, Takata M, Kumasaka T. Structural Basis for Polymer Packing and Solvation Properties of the Organogermanium Crystalline Polymer Propagermanium and Its Derivatives. J Pharm Sci. 2015 Aug;104(8):2482-8. doi: 10.1002/jps.24486. Epub 2015 Jun 2. PubMed PMID: 26037234.
T22305	Dexrazoxane	ICRF-187	24584-09-6	C[C@@H](CN(CC(N1)=O)CC1=O)N(CC(N1)=O)CC1=O	C11H16N4O4	268.27	FDA,EMA,PMDA		Cardiovascular system	Others	Others	others	Dexrazoxane is an anticancer drug used to block mitosis and arrest dividing cells. It is an iron chelator and provides cardioprotection against anthracycline toxicity.	Jones, R.L., Utility of dexrazoxane for the reduction of anthracycline-induced cardiotoxicity. Expert Rev Cardiovasc Ther, 2008. 6(10): p. 1311-7.
T9170	Testosterone decanoate		5721-91-5	C[C@@]12[C@@H](OC(CCCCCCCCC)=O)CC[C@@]1([H])[C@]3([H])CCC4=CC(CC[C@]4(C)[C@@]3([H])CC2)=O	C29H46O3	442.67	Other countries		Reproductive system	Others	Others	Others	Subcutaneous etonogestrel can be used for birth control.	Brady BM, Amory JK, et al. A multicentre study investigating subcutaneous etonogestrel implants with injectable testosterone decanoate as a potential long-acting male contraceptive. Hum Reprod. 2006 Jan;21(1):285-94.
TQ0077	Ceftobiprole	Ro 63-9141; BAL 9141	209467-52-7	Nc1nc(/C(/C(N[C@H]([C@@H]2SCC(/C=C(\CCN3[C@@H]4CNCC4)/C3=O)=C(C(O)=O)N22)C2=O)=O)=N/O)ns1	C20H22N8O6S2	534.57	EMA		Infection	Microbiology/virology	Antibacterial	Bacterial	Ceftobiprole is a broad-spectrum cephalosporin with activity against Methicillin-resistant staphylococcus aureus (MRSA; MIC90: 2 μg/mL).	Kisgen J, et al. Ceftobiprole, a Broad-Spectrum Cephalosporin With Activity against Methicillin-Resistant Staphylococcus aureus (MRSA). P T. 2008 Nov;33(11):631-41.
T7068	Eicosapentaenoic acid ethyl ester	EPA ethyl ester; Ethyl eicosapentaenoate; Eicosapentaenoic acid ethyl ester; Icosapent ethyl	86227-47-6	CC/C=C\C/C=C\C/C=C\C/C=C\C/C=C\CCCC(OCC)=O	C22H34O2	330.5	FDA		Cardiovascular system	Metabolism	Endogenous Metabolite	Endogenous Metabolite	Eicosapentaenoic acid ethyl ester is an omega-3 fatty acid agent.	Bays H E , Braeckman R A , Ballantyne C M , et al. Icosapent ethyl, a pure EPA omega-3 fatty acid: effects on lipoprotein particle concentration and size in patients with very high triglyceride levels (the MARINE study).[J]. Journal of Clinical Lipidology, 2012, 6(6):565-572.
T21469	Cyclopenthiazide	Cyclomethiazide; Su-8341; SU 8341	742-20-1	NS(c(cc(c(NC(CC1CCCC1)N1)c2)S1(=O)=O)c2Cl)(=O)=O	C13H18ClN3O4S2	379.88	NMPA		Cardiovascular system	Others	Others	Others	Cyclopenthiazide is a thiazide diuretic used to treat hypertension and heart failure. It decreases the excretion of calcium ions and uric acid and increases the excretion of sodium and potassium ions.	Krum H, Jackson B, Conway EL, Howes LG, Johnston CI, Louis WJ. Steady-state pharmacokinetics and pharmacodynamics of cilazapril in the presence and absence of cyclopenthiazide. J Cardiovasc Pharmacol. 1992 Sep;20(3):451-7. PubMed PMID: 1279292.
T22371	Mivacurium dichloride	Mivacurium chloride	106861-44-3	C[N+](CCCOC(CC/C=C/CCC(OCCC[N+](C)(CC1)[C@H](Cc(cc2OC)cc(OC)c2OC)c(cc2OC)c1cc2OC)=O)=O)(CC1)[C@H](Cc(cc2OC)cc(OC)c2OC)c(cc2OC)c1cc2OC.[Cl-].[Cl-]	C58H80Cl2N2O14	1100.17	FDA;NMPA		Others	Neuroscience	AChR	nAChR	Mivacurium chloride is a non-depolarising, rapid neuromuscular blocker of short duration, used therefore as anesthetic, to provide skeletal muscle relaxation in minor surgical operations, in emergency surgical procedures of short to intermediate duration and during intubation of the trachea.	Delu Che, et al. Mivacurium Induce Mast Cell Activation and Pseudo-Allergic Reactions via MAS-related G Protein Coupled receptor-X2. Cell Immunol. 2018 Oct;332:121-128.
T13164	Tipepidine hydrochloride		1449686-84-3	CN1C/C(CCC1)=C(C2=CC=CS2)\C3=CC=CS3.[H]Cl	C15H18ClNS2	311.89	PMDA		Respiratory system	GPCR/G Protein; Neuroscience; Membrane transporter/Ion channel	Dopamine Receptor; Potassium Channel	D2; Potassium Channel	Tipepidine hydrochloride is a reversible inhibitor of dopamine (DA) D2 receptor-mediated GIRK currents (IDA(GIRK)) (IC50: 7.0 μM), with antidepressant-like effect.	Hamasaki R, et al. Tipepidine activates VTA dopamine neuron via inhibiting dopamine D₂ receptor-mediated inward rectifying K⁺ current. Neuroscience. 2013 Nov 12;252:24-34.
TQ0197	Acenocoumarol		152-72-7	CC(CC(c(cc1)ccc1[N+]([O-])=O)C(C(Oc1c2cccc1)=O)=C2O)=O	C19H15NO6	353.33	NMPA		Cardiovascular system; Nervous system	Metabolism	Vitamin	vitamin K	Acenocoumarol is a Vitamin K antagonist and used as an anticoagulant.	NA
T0245	RS 61443	Mycophenolate Mofetil; TM-MMF	115007-34-6	O=C(OCCN1CCOCC1)CC/C(C)=C/CC2=C(O)C3=C(COC3=O)C(C)=C2OC	C23H31NO7	433.5	FDA ;EMA;NMPA		Others	Metabolism	Dehydrogenase	IMPDH	RS 61443 is an immunosuppressant, a non-competitive, selective and reversible inhibitor of inosine monophosphate dehydrogenase (IMPDH)	Zwerner J , Fiorentino D . Mycophenolate mofetil[J]. Dermatologic Therapy, 2010, 20(4):229-238.
T14830	Bromperidol	R-11333	10457-90-6	OC1(CCN(CCCC(c(cc2)ccc2F)=O)CC1)c(cc1)ccc1Br	C21H23BrFNO2	420.32	PMDA		nervous system	GPCR/G Protein; Neuroscience	5-HT Receptor	5-HT Receptor	Bromperidol is a butyrophenone derivative and it is a potent and long-acting neuroleptic. Which is used as an antipsychotic in the treatment of schizophrenia.	NA
T9124	Laninamivir octanoate	CS-8958	203120-46-1	O=C(C1=C[C@H](NC(N)=N)[C@@H](NC(C)=O)[C@H]([C@H](OC)[C@H](O)COC(CCCCCCC)=O)O1)O	C21H36N4O8	472.53	PMDA		Infection	Microbiology/virology	Influenza Virus	Influenza Virus; influenza neuraminidase (NA)	Laninamivir octanoate is a long acting influenza neuraminidase (NA) inhibitor which shows superior anti-influenza virus activity.	Yamashita M . CS-8958, a Prodrug of the New Neuraminidase Inhibitor R-125489, Shows Long-Acting Anti-Influenza Virus Activity[J]. Antimicrobial Agents & Chemotherapy, 2009, 53.
T19663	Triheptanoin	IND-106011; UX-007; IND106011; UX007; IND 106011; UX 007	620-67-7	CCCCCCC(OCC(OC(CCCCCC)=O)COC(CCCCCC)=O)=O	C24H44O6	428.61	FDA		Endocrine system	Others	Others	fatty acid metabolic	Triheptanoin is a fatty acid metabolic modulator. It potentially for the treatment of fatty acid oxidation disorders and GLUT1.	Vockley J, Marsden D, McCracken E, DeWard S, Barone A, Hsu K, Kakkis E. Long-term major clinical outcomes in patients with long chain fatty acid oxidation disorders before and after transition to triheptanoin treatment--A retrospective chart review. Mol Genet Metab. 2015 Sep-Oct;116(1-2):53-60. doi: 10.1016/j.ymgme.2015.06.006. Review. Erratum in: Mol Genet Metab. 2015 Nov;116(3):221. PubMed PMID…
T13655	DL-Norepinephrine hydrochloride	DL-lysine; Lys	55-27-6	OC1=CC=C(C(O)CN)C=C1O.[H]Cl	C8H12ClNO3	205.64	FDA;PMDA;NMPA		Cardiovascular system;nervous system	GPCR/G Protein; Neuroscience	Adrenergic Receptor	Adrenergic Receptor; α1-adrenoceptor; β1-adrenoceptor	DL-Norepinephrine hydrochloride is a high-affinity basic amino acid substrate of amino acid transporter b0 + with a Km value in the range of 100-400 μM.	Matsuda H, et al. Effects of nitroglycerin, adenosine, noradrenaline, and isoproterenol on the myocardial oxygen tension. Jpn Heart J. 1979 Nov;20(6):867-79.
TQ0126	Mirodenafil dihydrochloride	SK-3530 dihydrochloride	862189-96-6	[H]Cl.[H]Cl.O=C1C(N(CC)C=C2CCC)=C2N=C(C3=CC(S(=O)(N4CCN(CCO)CC4)=O)=CC=C3OCCC)N1	C26H39Cl2N5O5S	604.59	South Korea		Reproductive system	Metabolism	PDE	PDE5; phosphodiesterase	Mirodenafil dihydrochloride is a PDE-5 inhibitor developed for the treatment of erectile dysfunction.	Paick, J.S., et al., Efficacy and safety of mirodenafil, a new oral phosphodiesterase type 5 inhibitor, for treatment of erectile dysfunction. J Sex Med, 2008. 5(11): p. 2672-80.
T15588	Iobenguane sulfate	MIBG sulfate	87862-25-7	NC(NCC1=CC=CC(I)=C1)=N.O=S(O)(O)=O.NC(NCC2=CC=CC(I)=C2)=N	C8H10IN3.1/2H2O4S	324.13	FDA		Others	Others	Others	Others	Iobenguane sulfate is a high-affinity substrate for cholera toxin that interferes with cellular mono(ADP-ribosylation). Radioiodinated Iobenguane sulfate is clinically used as a tumor-targeted radiopharmaceutical in the diagnosis and treatment of adrenergic tumors.	Loesberg C, et al. Meta-iodobenzylguanidine (MIBG), a novel high-affinity substrate for cholera toxin that interferes with cellular mono(ADP-ribosylation). Biochim Biophys Acta. 1990 Jan 19;1037(1):92-9.
TQ0095	Brincidofovir	CMX001; HDP-CDV	444805-28-1	OC[C@H](CN1C=CC(N)=NC1=O)OCP(O)(OCCCOCCCCCCCCCCCCCCCC)=O	C27H52N3O7P	561.69	FDA		Others	Immunology/Inflammation; Microbiology/virology	Antiviral; HSV	Antiviral; CMV; HSV	Brincidofovir is an orally active, lipophilic form of cidofovir. It has enhanced activity compared to CDV against certain adenoviruses, herpesviruses, and orthopoxviruses.	Marty FM, et al. CMX001 to prevent cytomegalovirus disease in hematopoietic-cell transplantation. N Engl J Med. 2013 Sep 26;369(13):1227-36.
TP2337	Ganirelix Acetate		123246-29-7	CCN/C(NCC)=N/CCCC[C@@H](NC([C@@H](NC([C@@H](NC([C@H](NC([C@H](NC([C@H](NC(C)=O)CC1=CC2=CC=CC=C2C=C1)=O)CC3=CC=C(Cl)C=C3)=O)CC4=CN=CC=C4)=O)CO)=O)CC5=CC=C(O)C=C5)=O)C(N[C@H](C(N[C@H](C(N6CCC[C@H]6C(N[C@@H](C(N)=O)C)=O)=O)CCCC/N=C(NCC)/NCC)=O)CC(C)C)=O.CC(O)=O	C82H117ClN18O15	1630.4	FDA;EMA;PMDA;NMPA		reproductive system	GPCR/G Protein	GNRH Receptor	GnRHR	Ganirelix Acetate is a gonadotropin-releasing hormone (GnRH) receptor antagonist	Rabasseda X , Leeson P , J Castañer. Ganirelix acetate.[J]. Drugs of the Future, 1999, 24(4).
T7588	Lefamulin	BC-3781	1061337-51-6	O=C(O[C@H]1[C@@]([C@H](C)CC2)(C)[C@@](C(CC3)=O)([H])[C@]32[C@@H](C)[C@H](O)[C@](C)(C=C)C1)CS[C@H]4[C@H](O)C[C@H](N)CC4	C28H45NO5S	507.3	FDA;EMA		Infection;Respiratory system	Others	Others	Others	Lefamulin is a semi-synthetic compound that inhibits the synthesis of bacterial protein, which is required for bacteria to grow.	Veve M P , Wagner J L . Lefamulin: Review of a Promising Novel Pleuromutilin Antibiotic[J]. Pharmacotherapy, 2018.
T13177L	Tocainide		41708-72-9	CC(N)C(NC1=C(C)C=CC=C1C)=O	C11H16N2O	192.13	FDA;NMPA		Cardiovascular system	Membrane transporter/Ion channel	Sodium Channel	sodium channel	Tocainide is a blocker of the sodium channel and used for the treatment of tinnitus.	Alpert JS, et al. Chemistry, pharmacology, antiarrhythmic efficacy and adverse effects of tocainide hydrochloride, an orally active structural analog of lidocaine. Pharmacotherapy. 1983 Nov-Dec;3(6):316-23.
T10988L	Degarelix acetate(214766-78-6 free base)		T10988L	CC(O)=O.C[C@@H](NC([C@H]1N(CCC1)C([C@@H](NC([C@@H](NC([C@H](NC([C@@H](NC([C@@H](NC([C@H](NC([C@H](NC([C@H](NC(C)=O)CC2=CC=C3C=CC=CC3=C2)=O)CC4=CC=C(C=C4)Cl)=O)CC5=CC=CN=C5)=O)CO)=O)CC6=CC=C(C=C6)NC([C@@H](N7)CC(NC7=O)=O)=O)=O)CC8=CC=C(C=C8)NC(N)=O)=O)CC(C)C)=O)CCCCNC(C)C)=O)=O)C(N)=O	C84H107ClN18O18	1692.34	FDA;NMPA;PMDA;EMA		Urinary system;cancer	GPCR/G Protein	GNRH Receptor	GnRHR	Degarelix acetate is a competitive and reversible antagonist of gonadotropin-releasing hormone receptor (GnRHR) .	Rick FG, et al. An update on the use of degarelix in the treatment of advanced hormone-dependent prostate cancer. Onco Targets Ther. 2013 Apr 16;6:391-402.
T20293	Phenoxyethanol	NSC 1864; NSC-1864; NSC1864	122-99-6	OCCOC1=CC=CC=C1	C8H10O2	138.17	Canada;US		Others	Microbiology/virology	Antibacterial	Bacterial	Phenoxyethanol is germicidal. It often used together with quaternary ammonium compounds.	Soltanian S, Hoseinifar SH, Gholamhosseini A. Modulation of rainbow trout (Oncorhynchus mykiss) cutaneous mucosal immune responses following anesthesia: A comparative study on different anesthetic agents. Fish Shellfish Immunol. 2018 Jun 16. pii: S1050-4648(18)30373-5. doi: 10.1016/j.fsi.2018.06.032. [Epub ahead of print] PubMed PMID: 29920385.
T7587	Tenapanor	AZD-1722; AZD 1722; AZD1722; RDX 5791; RDX-5791; RDX5791	1234423-95-0	O=S(C1=CC=CC([C@@H]2CN(C)CC3=C2C=C(Cl)C=C3Cl)=C1)(NCCOCCOCCNC(NCCCCNC(NCCOCCOCCNS(=O)(C4=CC=CC([C@@H]5CN(C)CC6=C5C=C(Cl)C=C6Cl)=C4)=O)=O)=O)=O	C50H66Cl4N8O10S2	1145.04	FDA		digestive system	Membrane transporter/Ion channel	Sodium Channel	Sodium Channel	Tenapanor is an inhibitor of the sodium-proton (Na(+)/H(+)) exchanger NHE3, which plays a prominent role in sodium handling in the gastrointestinal tract and kidney. Tenapanor possesses an excellent preclinical safety profile and, as of now, there are no serious concerns about its side effects.	Johansson SA, Knutsson M, Leonsson-Zachrisson M, Rosenbaum DP. Effect of Food Intake on the Pharmacodynamics of Tenapanor: A Phase 1 Study. Clin Pharmacol Drug Dev. 2017 Mar 24. doi: 10.1002/cpdd.341. [Epub ahead of print] PubMed PMID: 28339149.
T4562L	Ramosetron hydrochloride	YM-060; YM 060; YM060	132907-72-3	O=C(C1=CN(C)C2=C1C=CC=C2)[C@@H](C3)CCC4=C3NC=N4.Cl	C17H18ClN3O	315.8	NMPA;PMDA		Digestive system	GPCR/G Protein; Neuroscience	5-HT Receptor	5-HT Receptor; 5-HT3	Ramosetron hydrochloride is a serotonin 5-HT3 receptor antagonist. It is used to treat diarrhea-predominant irritable bowel syndrome and nausea.	Kim TK, Cho YJ, Lim CW, Min JJ, Choi EK, Hong DM, Jeon Y. Effect of ramosetron on QTc interval: a randomised controlled trial in patients undergoing off-pump coronary artery bypass surgery. BMC Anesthesiol. 2016 Aug 3;16(1):56. doi: 10.1186/s12871-016-0222-1. PubMed PMID: 27488394; PubMed Central PMCID: PMC4972982.
T21300	Trientine-2HCl	TETA; Trien; Triethylenetetramine; Triethylene tetramine; Trientine; Trientine HCl	38260-01-4	NCCNCCNCCN.[H]Cl.[H]Cl	C6H20Cl2N4	219.15	FDA;EMA;PMDA		Chromosomal disease	Others	Others	Others	Trientine-2HCl, a chelating agent, is used to treat Wilson's disease by binding up and removing copper in the body. Trientine can also be used as a chelating agent for copper in hepatolenticular degeneration, as a stabilizer for epoxy resins, and as ampholyte for isoelectric focusing.	Ala A, Aliu E, Schilsky ML. Prospective Pilot Study of a Single Daily Dosage of Trientine for the Treatment of Wilson Disease. Dig Dis Sci. 2015 Jan 21. [Epub ahead of print] PubMed PMID: 25605552.
TC0025	Testosterone acetate	NSC 523836; NSC-523836; NSC523836	1045-69-8	C[C@@]12CCC[C@@]1([H])[C@]3([H])CCC4=CC(C(OC(C)=O)C[C@]4(C)[C@@]3([H])CC2)=O	C21H30O3	330.47	FDA		Reproductive system	Others	Others	Others	Testosterone acetate is a hormone with in vitro antitumor activity.	Mohamed ZH, El-Koussi NA, Mahfouz NM, Youssef AF, Abdel Jaleel GA, Shouman SA. Cu (I) catalyzed alkyne-azide 1,3-dipolar cycloaddition (CuAAC): Synthesis of 17α-[1-(substituted phenyl)-1,2,3-triazol-4-yl]-19-nor-testosterone-17β-yl acetates targeting progestational and antipro-liferative activities. Eur J Med Chem. 2015 Jun 5;97:75-82. doi: 10.1016/j.ejmech.2015.04.045. Epub 2015 Apr 28. PubMed P…
T9047	Fluprednisolone	NSC 47439; NSC-47439; NSC47439	53-34-9	C[C@]12C[C@@H]([C@H]3[C@H]([C@@H]1CC[C@@]2(C(=O)CO)O)C[C@@H](C4=CC(=O)C=C[C@]34C)F)O	C21H27FO5	378.44	FDA		Inflammation	Others	Others	Others	Fluprednisolone is a synthetic glucocorticoid that has anti-inflammatory properties.	Cho SH, Park JA, Zheng W, Abd El-Aty AM, Kim SK, Choi JM, Yi H, Cho SM, Afifi NA, Shim JH, Chang BJ, Kim JS, Shin HC. Quantification of bupivacaine hydrochloride and isoflupredone acetate residues in porcine muscle, beef, milk, egg, shrimp, flatfish, and eel using a simplified extraction method coupled with liquid chromatography-triple quadrupole tandem mass spectrometry. J Chromatogr B Analyt Te…
T20089	ATP	Adenosine triphosphate; Ara-ATP; Atipi; ATP; Triphosphaden; Triphosphoric acid adenosine ester; ATP disodium salt hydrate	56-65-5	C1=NC(=C2C(=N1)N(C=N2)[C@H]3[C@@H]([C@@H]([C@H](O3)COP(=O)(O)OP(=O)(O)OP(=O)(O)O)O)O)N	C10H16N5O13P3	507.18	PMDA;NMPA		Others	Metabolism	Endogenous Metabolite	Endogenous Metabolite	Adenosine triphosphate is an adenine nucleotide containing three phosphate groups esterified to the sugar moiety. In addition to its crucial roles in metabolism adenosine triphosphate is a neurotransmitter.	C K, Clark RB, Kim TY, D B, U B, Szerencsei RT, Jalloul AH, Schnetkamp PPM, Kw S, Wr G. ATP Triggers a Robust Intracellular [Ca(2+) ] - Mediated Signalling Pathway in Human Synovial Fibroblasts. Exp Physiol. 2018 May 23. doi: 10.1113/EP086851. [Epub ahead of print] PubMed PMID: 29791754.
T5520L	Cetrorelix diacetate	NS-75A diacetate; SB-075 diacetate; Cetrorelix diacetate	130143-01-0	C[C@H](C(=O)N)NC(=O)[C@@H]1CCCN1C(=O)[C@H](CCCN=C(N)N)NC(=O)[C@H](CC(C)C)NC(=O)[C@@H](CCCNC(=O)N)NC(=O)[C@H](CC2=CC=C(C=C2)O)NC(=O)[C@H](CO)NC(=O)[C@@H](CC3=CN=CC=C3)NC(=O)[C@@H](CC4=CC=C(C=C4)Cl)NC(=O)[C@@H](CC5=CC6=CC=CC=C6C=C5)NC(=O)C.CC(=O)O.CC(=O)O	C74H100ClN17O18	1551.17	FDA;EMA;NMPA		Reproductive system	GPCR/G Protein	GNRH Receptor	GnRHR	Cetrorelix diacetate is is a gonadotropin-releasing hormone antagonist. It works by blocking the action of GnRH upon the pituitary, thus rapidly suppressing the production and action of luteinizing hormone (LH) and follicle-stimulating hormone (FSH).	Tur-Kaspa I, Ezcurra D. GnRH antagonist, cetrorelix, for pituitary suppression in modern, patient-friendly assisted reproductive technology. Expert Opin Drug Metab Toxicol. 2009 Oct;5(10):1323-36. doi: 10.1517/17425250903279969. Review. PubMed PMID: 19761413.
T1756L	Ilaprazole	IY81149; IY-81149; IY 81149	172152-36-2	O=S(C1=NC2=CC=C(N3C=CC=C3)C=C2N1)CC4=NC=CC(OC)=C4C	C19H18N4O2S	366.44	NMPA		Digestive system	MAPK; Membrane transporter/Ion channel	Proton pump; TOPK	proton pump; TOPK	Ilaprazole is a proton pump inhibitor used in the treatment of dyspepsia gastroesophageal reflux disease (GORD/GERD) and duodenal ulcer. Studies also showed that Ilaprazole significantly prevented the development of reflux oesophagitis.	Zhou G, Shi S, Zhang W, Tan Z, Chen Y, Guo D, Zhou H, Hu H, Tan J. Identification of ilaprazole metabolites in human urine by HPLC-ESI-MS/MS and HPLC-NMR experiments. Biomed Chromatogr. 2010 Oct;24(10):1130-5. doi: 10.1002/bmc.1416. PubMed PMID: 20352613.
T21383	D-Thyroxine	Dextrothyroxine; Biotirmone; Debetrol; Dethyrona; Detyroxin; Dextroid; Dextroxin	51-49-0	C1=C(C=C(C(=C1I)OC2=CC(=C(C(=C2)I)O)I)I)C[C@H](C(=O)O)N	C15H11I4NO4	776.87	FDA		Cardiovascular system	Others	Others	Others	Dextrothyroxine could lower cholesterol and also increases hepatic lipase which in turn improves utilization of triglycerides, leading to improve apolipoprotein E cholesterol particles.	Schwartz ID, Bercu BB. Dextrothyroxine in the treatment of generalized thyroid hormone resistance in a boy homozygous for a defect in the T3 receptor. Thyroid. 1992 Spring;2(1):15-9. PubMed PMID: 1525565.
T10358	Netarsudil hydrochloride	AR-13324 Dihydrochloride	1253952-02-1	CC1=CC(=C(C=C1)C(=O)OCC2=CC=C(C=C2)[C@@H](CN)C(=O)NC3=CC4=C(C=C3)C=NC=C4)C.Cl.Cl	C28H29Cl2N3O3	526.45	FDA; EMA		Others	Cell Cycle/Checkpoint; Cytoskeletal Signaling; Stem Cells	ROCK	ROCK	Netarsudil hydrochloride is an inhibitor of Rho-associated protein kinase (ROCK) and norepinephrine transporter (NET) with effective in intraocular pressure (IOP) reduction.	Wang RF, et al. Effect of 0.04% AR-13324, a ROCK, and norepinephrine transporter inhibitor, on aqueous humor dynamics in normotensive monkey eyes. J Glaucoma. 2015 Jan;24(1):51-54.
T15719	Latanoprostene bunod	NCX116; LBN	860005-21-6	C1[C@H]([C@@H]([C@H]([C@H]1O)C/C=C\CCCC(=O)OCCCCO[N+](=O)[O-])CC[C@H](CCC2=CC=CC=C2)O)O	C27H41NO8	507.62	FDA		Others	Others	Others	Others	Latanoprostene bunod is nitric oxide (NO)-donating prostaglandin F2a analog and is a topical ophthalmic therapeutic. It is used for the reduction of intraocular pressure (IOP) in patients with open-angle glaucoma or ocular hypertension (OHT).	Cavet ME, et al. The Role of Nitric Oxide in the Intraocular Pressure Lowering Efficacy of Latanoprostene Bunod: Review of Nonclinical Studies. J Ocul Pharmacol Ther. 2018 Jan/Feb;34(1-2):52-60.
T12882L	Setmelanotide Acetate(920014-72-8 free base)	RM-493 Acetate; BIM-22493 Acetate; IRC-022493 Acetate	T12882L	O=C([C@@H](NC([C@H](NC([C@@H](NC([C@H](NC([C@H](CSSC[C@H](NC1=O)C(N)=O)NC([C@@H](NC(C)=O)CCCNC(N)=N)=O)=O)C)=O)CC2=CN=CN2)=O)CC3=CC=CC=C3)=O)CCCNC(N)=N)N[C@H]1CC4=CNC5=CC=CC=C45.CC(O)=O	C51H72N18O11S2	1177.35	FDA		metabolism	GPCR/G Protein; Neuroscience	Melanocortin Receptor	hMC1R; hMC3R; hMC4R; hMC5R; rMC4R	Setmelanotide Acetate is a selective agonist of melanocortin 4 receptor (MC4R)(human and rat MC4R with EC50s of 0.27 nM and 0.28 nM, respectively).	Kumar KG, et al. Analysis of the therapeutic functions of novel melanocortin receptor agonists in MC3R- and MC4R-deficient C57BL/6J mice. Peptides. 2009 Oct;30(10):1892-900.
T6956L	Protirelin Acetate(24305-27-9 free base)	pGlu-His-Pro-NH2 Acetate; Synthetic thyrotropin-releasing hormone Acetate; TRF Acetate; TRH Acetate; Thyroliberin Acetate; Lopremone Acetate	T6956L	O=C([C@@H](NC([C@@H]1CCC(N1)=O)=O)CC2=CN=CN2)N3[C@H](C(N)=O)CCC3.CC(O)=O	C18H26N6O6	422.44	FDA		Others	Endocrinology/Hormones	Thyroid hormone receptor(THR)	Thyroid hormone	Protirelin Acetate is a tripeptide that stimulates the release of thyrotropin and prolactin.	Van Sinay E,etal.Evolutionarily conserved TRH neuropeptide pathway regulates growth in Caenorhabditis elegans.Proc Natl Acad Sci U S A. 2017 May 16;114(20):E4065-E4074.
T19965	Dacomitinib hydrate	PF-00299804; PF00299804; PF 00299804; PF299804; PF-299804; PF 299804	1042385-75-0	COC1=C(C=C2C(=C1)N=CN=C2NC3=CC(=C(C=C3)F)Cl)NC(=O)/C=C/CN4CCCCC4.O	C24H27ClFN5O3	487.96	FDA		respiratory system	Angiogenesis; JAK/STAT signaling; Tyrosine Kinase/Adaptors	EGFR	EGFR	Dacomitinib hydrate is a highly selective and second-generation small-molecule inhibitor of the pan-epidermal growth factor receptor family of tyrosine kinases. Dacomitinib specifically and irreversibly binds to and inhibits human EGFR subtypes, resulting in inhibition of proliferation and induction of apoptosis in EGFR-expressing tumor cells.	Ou SH, Soo RA. Dacomitinib in lung cancer: a "lost generation" EGFR tyrosine-kinase inhibitor from a bygone era? Drug Des Devel Ther. 2015 Oct 15;9:5641-53. doi: 10.2147/DDDT.S52787. eCollection 2015. Review. PubMed PMID: 26508839.
T20576	Lactitol	Lactit; Lactosit Miruhen; NSC 231323; NSC-231323; NSC231323; D-Lactitol	585-86-4	OC[C@@H]([C@H]([C@@H]([C@@H](CO)O)O[C@H]1[C@@H]([C@H]([C@H]([C@@H](CO)O1)O)O)O)O)O	C12H24O11	344.31	FDA		Digestive system	Others	Others	Others	Lactitol is a agent that acts on the gastrointestinal tract.	Miller LE, Tennilä J, Ouwehand AC. Efficacy and tolerance of lactitol supplementation for adult constipation: a systematic review and meta-analysis. Clin Exp Gastroenterol. 2014 Jul 12;7:241-8. doi: 10.2147/CEG.S58952. eCollection 2014. Review. PubMed PMID: 25050074.
T17310	Phenylephrine	(R)-(-)-Phenylephrine; L-Phenylephrine	59-42-7	O[C@H](C1=CC(O)=CC=C1)CNC	C9H13NO2	167.21	FDA		cardiovascular system	GPCR/G Protein; Neuroscience	Adrenergic Receptor	Adrenergic Receptor; α1A-adrenergic receptor; α1B-adrenergic receptor; α1D-adrenergic receptor	Phenylephrine is a selective α1-adrenoceptor agonist ( pKi: 5.86, 4.87 and 4.70 for α1D, α1B, and α1A receptors respectively).	Ford AP, et al. Pharmacological pleiotropism of the human recombinant alpha1A-adrenoceptor: implications foralpha1-adrenoceptor classification. Br J Pharmacol. 1997 Jul;121(6):1127-35.
T12829	Salmeterol	GR33343X	89365-50-4	OC1=CC=C(C(O)CNCCCCCCOCCCCC2=CC=CC=C2)C=C1CO	C25H37NO4	415.57	FDA		respiratory system	GPCR/G Protein; Neuroscience	Adrenergic Receptor	Adrenergic Receptor; β2-adrenoceptor	Salmeterol is a long-acting agonist of beta2-adrenergic receptor (beta 2AR) used for treatment ofasthma.	Rong, Y., et al., Probing the salmeterol binding site on the beta 2-adrenergic receptor using a novel photoaffinity ligand, [(125)I]iodoazidosalmeterol. Biochemistry, 1999. 38(35): p. 11278-86.
T9037	Thiohexam		95-33-0	C1CCC(CC1)NSC2=NC3=CC=CC=C3S2	C13H16N2S2	264.41	US		others	Others	Others	Others	Thiohexam is a rubber vulcanization accelerator	Rudzki E , T Napiórkowska. [Contact allergy to the rubber cure accelerator, thiohexam][J]. Przeglad Dermatologiczny, 1984, 71(3):221.
TP2320	Pramlintide acetate(151126-32-8 free base)		187887-46-3	CC[C@@H]([C@H](NC([C@@H]1CCCN1C(CNC([C@@H](NC([C@@H](NC([C@@H](NC([C@@H](NC([C@@H](NC([C@@H](NC([C@@H](NC([C@@H](NC([C@@H](NC([C@@H](NC([C@@H](NC([C@@H](NC([C@@H](NC([C@@H](NC([C@@H](NC([C@@H](NC([C@@H]2CSSC[C@H](NC([C@@H](N)CCCCN)=O)C(N[C@@H](CC(N)=O)C(N[C@@H]([C@H](O)C)C(N[C@@H](C)C(N[C@@H]([C@H](O)C)C(N2)=O)=O)=O)=O)=O)=O)C)=O)[C@H](O)C)=O)CCC(N)=O)=O)CCCNC(N)=N)=O)CC(C)C)=O)C)=O)CC(N)=O)=O)CC…	C173H271N51O55S2	4009	FDA		metabolism	Others	Others	Others	Pramlintide acetate is a polypeptide analogue of human amylin. Pramlintide acetate, an antidiabetic agent, is antineoplastic in colorectal cancer.	Maha S Al-Keilani, et al. Pramlintide, an antidiabetic, is antineoplastic in colorectal cancer and synergizes with conventional chemotherapy. Clin Pharmacol. 2018 Mar 5;10:23-29.
T20253	N,N'-Diphenylguanidine	NSC 3272; NSC-3272; NSC3272	102-06-7	C1=CC=C(C=C1)NC(=NC2=CC=CC=C2)N	C13H13N3	211.27	US		others	Others	Others	Others	N,N'-Diphenylguanidine is an agent of biochemical.	Liang S, Fu X, Xiao H, Li T, Xu J, Zhang Y. Strategy for the separation of concentrated samples by capillary electrophoresis. J Sep Sci. 2017 Sep;40(18):3734-3739. doi: 10.1002/jssc.201700512. Epub 2017 Aug 31. PubMed PMID: 28727289.
T21294	Polmacoxib	CG100649; CG-100649; CG 100649; polmacoxib	301692-76-2	CC1(C(=O)C(=C(O1)C2=CC=C(C=C2)S(=O)(=O)N)C3=CC(=CC=C3)F)C	C18H16FNO4S	361.39	South Korea		Inflammation	Immunology/Inflammation; Neuroscience; Metabolism	Carbonic Anhydrase; COX	carbonic anhydrase; COX-2	Polmacoxib is a first-in-class NSAID drug candidate, is a dual inhibitor of carbonic anhydrase (CA) and COX-2. Polmacoxib inhibits premalignant and malignant colorectal lesions in mouse models, partly through inhibiting tumor cell proliferation.	Kim SH, Margalit O, Katoh H,et al. CG100649, a novel COX-2 inhibitor, inhibits colorectal adenoma and carcinoma growth in mouse models. Invest New Drugs. 2014 Aug 3. [Epub ahead of print] PubMed PMID: 25085205.
T13545	Aluminum Hydroxide		21645-51-2	O[Al](O)O	AlH3O3	78	FDA,NMPA		digestive	Others	Others	Others	Aluminum Hydroxide is an orally active main form of aluminum used as an adjuvant. Aluminum hydroxide-based adjuvant researches including the repository effect, pro-phagocytic effect, and activation of the pro-inflammatory NLRP3 pathway.	He P, et al. Advances in aluminum hydroxide-based adjuvant research and its mechanism. Hum Vaccin Immunother. 2015;11(2):477-88.
T10217L	Abarelix	R3827; PPI 149	183552-38-7	C[C@H](C(=O)N)NC(=O)[C@@H]1CCCN1C(=O)[C@H](CCCCNC(C)C)NC(=O)[C@H](CC(C)C)NC(=O)[C@@H](CC(=O)N)NC(=O)[C@H](CC2=CC=C(C=C2)O)N(C)C(=O)[C@H](CO)NC(=O)[C@@H](CC3=CN=CC=C3)NC(=O)[C@@H](CC4=CC=C(C=C4)Cl)NC(=O)[C@@H](CC5=CC6=CC=CC=C6C=C5)NC(=O)C	C72H95ClN14O14	1416.06	FDA		cancer	GPCR/G Protein	GNRH Receptor	GnRHR	Abarelix is a potent gonadotrophin-releasing hormone (GnRH) antagonist, which is used for prostate cancer treatment.	Koechling W, et al. A novel GnRH antagonist, causes minimal histamine release compared with abarelix in an ex vivo model of human skin samples. Br J Clin Pharmacol. 2010 Oct;70(4):580-7.
T5058	Pamiparib	BGB-290; Pamiparib	1446261-44-4	C[C@]12CCCN1CC3=NNC(=O)C4=C5C3=C2NC5=CC(=C4)F	C16H15FN4O	298.31	NMPA		Cancer	Chromatin/Epigenetic; DNA Damage/DNA Repair	PARP	PARP; PARP1; PARP2	BGB-290 is an orally active, potent, highly selective PARP inhibitor(IC50 of 0.9 nM and 0.5 nM for PARP1 and PARP2, respectively). It has potent PARP trapping, and capability to penetrate the brain, and can be used for the research of various cancers including the solid tumor	Xiong Y , Guo Y , Liu Y , et al. Pamiparib is a potent and selective PARP inhibitor with unique potential for the treatment of brain tumor[J]. Neoplasia (New York, N.Y.), 2020, 22(9):431-440.
T21446	Rotigotine Hydrochloride	N-0923 Hydrochloride; N-0923; N-0924; Rotigotine Hydrochloride; Rotigotine HCl; Rotigotine (Hydrochloride)	125572-93-2	OC1=C2CC[C@H](N(CCC)CCC3=CC=CS3)CC2=CC=C1.Cl	C19H26ClNOS	351.93	FDA;EMA;PMDA;NMPA		Nervous system	GPCR/G Protein; Neuroscience	5-HT Receptor; Adrenergic Receptor; Dopamine Receptor	5-HT Receptor; Adrenergic Receptor; D1; D2; D3; D4; D5; Dopamine; α2B-adrenergic receptor	Rotigotine Hydrochloride, a dopamine receptor agonist prefering for D3 receptors over D1 and D2, has effective activity of anti-Parkinsonian. Racemic rotigotine hydrochloride is about 50 times as potent as quinpirole, the gold standard D2 agonist.	Giladi N, Asgharnejad M, Bauer L, Grieger F, Boroojerdi B. Rotigotine in Combination with the MAO-B Inhibitor Selegiline in Early Parkinson's Disease: A Post Hoc Analysis. J Parkinsons Dis. 2016 Apr 2. [Epub ahead of print] PubMed PMID: 27061066.
T22455	Vindesine sulfate	Desacetyl Vinblastine amide; Desacetylvinblastine amide; DAVA; DVA; VDS	59917-39-4	CC[C@@]1(C[C@@H]2C[C@@](C3=C(CCN(C2)C1)C4=CC=CC=C4N3)(C5=C(C=C6C(=C5)[C@]78CCN9[C@H]7[C@@](C=CC9)([C@H]([C@@]([C@@H]8N6C)(C(=O)N)O)O)CC)OC)C(=O)OC)O.OS(=O)(=O)O	C43H57N5O11S	852	Canada		Cancer	Others	Others	Others	Vindesine sulfate is a vinca alkaloid which is a synthetic derivative of vinblastine, binds to the microtubular proteins of the mitotic spindle, leading to crystallization of the microtubule and mitotic arrest or cell death.	JB Sørensen, Hansen H H . Is there a role for vindesine in the treatment of non-small cell lung cancer?[J]. Investigational New Drugs, 1993, 11(2):103-133.
T22368	Metyrosine	α-Methyltyrosine	672-87-7	C[C@](C(O)=O)(N)CC1=CC=C(O)C=C1	C10H13NO3	195.22	FDA;PMDA		Cancer	Immunology/Inflammation; Neuroscience	COX	COX; COX-2	Metyrosine is an antihypertensive drug and could be used as a tyrosine hydroxylase inhibitor.Metyrosine significantly inhibits high COX-2 activity. Metyrosine is a very effective agent for blood pressure control.	Garg MK, et al. Medical management of pheochromocytoma: Role of the endocrinologist. Indian J Endocrinol Metab. 2011;15 Suppl 4(Suppl4):S329‐S336.
T11174	(R)-Elagolix	NBI-56418	834153-87-6	CC1=C(C(=O)N(C(=O)N1CC2=C(C=CC=C2F)C(F)(F)F)C[C@@H](C3=CC=CC=C3)NCCCC(=O)O)C4=C(C(=CC=C4)OC)F	C32H30F5N3O5	631.59	FDA		Reproductive system	GPCR/G Protein	GNRH Receptor	GnRHR	(R)-Elagolix is a short-acting, nonpeptide, GnRH antagonist with an IC50 and Ki of 0.25 and 3.7 nM, respectively. administered orally, that unlike injectable depot GnRH agonists and antagonists, produces a dose-dependent suppression of ovarian estrogen production, that is, from partial suppression at lower doses to full suppression at higher doses.	Carr B, et al. Elagolix, an oral GnRH antagonist, versus subcutaneous depot medroxyprogesterone acetate for the treatment of endometriosis: effects on bone mineral density. Reprod Sci. 2014 Nov;21(11):1341-1351.
TQ0107	Pemafibrate	(R)-K-13675	848259-27-8	CC[C@H](C(=O)O)OC1=CC=CC(=C1)CN(CCCOC2=CC=C(C=C2)OC)C3=NC4=CC=CC=C4O3	C28H30N2O6	490.55	PMDA		Cardiovascular system	DNA Damage/DNA Repair; Metabolism	PPAR	hPPARα; human PPARγ; PPARα	Pemafibrate is a highly specific PPARα agonist (EC50: 1 nM).	Yamazaki Y, et al. Design and synthesis of highly potent and selective human peroxisome proliferator-activated receptor alpha agonists. Bioorg Med Chem Lett. 2007 Aug 15;17(16):4689-93. Epub2007 May 24.
T22235	Lipoic acid	(R)-(+)-α-Lipoic acid; (R)-(+)-1,2-Dithiolane-3-pentanoic acid; R-(+)-Thioctic acid	1200-22-2	C1CSS[C@@H]1CCCCC(=O)O	C8H14O2S2	206.33	PMDA;NMPA		Others	Immunology/Inflammation; Metabolism; NF-κB	Endogenous Metabolite; Mitochondrial Metabolism; Reactive Oxygen Species	Endogenous Metabolite; Mitochondrial Metabolism; Reactive Oxygen Species	Lipoic acid is an organosulfur compound derived from octanoic acid. It is made in animals normally, and is essential for aerobic metabolism.	Solmonson A D , Deberardinis R J . Lipoic acid metabolism and mitochondrial redox regulation[J]. Journal of Biological Chemistry, 2017:jbc.TM117.000259.
T23377	Sodium acetate		127-09-3	CC(=O)[O-].[Na+]	C2H3NaO2	82.03	FDA;NMPA		Metabolism	Others	Others	Others	Sodium acetate is Commonly used laboratory reagent
T17159	Treosulfan	NSC 39069; Treosulphan	299-75-2	CS(=O)(=O)OC[C@@H]([C@H](COS(=O)(=O)C)O)O	C6H14O8S2	278.3	EMA		cancer	DNA Damage/DNA Repair	DNA Alkylation; DNA Alkylator/Crosslinker	DNA Alkylator; DNA Alkylator/Crosslinker	Treosulfan is a bifunctional alkylating agent. It also has activity in ovarian cancer and other solid tumor types.	Nitsch E, et al. Synergistic cytotoxic activity of treosulfan and LY 188011 in pancreatic cancer cell lines. Anticancer Res. 2014 Apr;34(4):1779-84.
T16471	Perflubron	Perfluorooctyl bromide; PFOB	423-55-2	C(C(C(C(C(F)(F)Br)(F)F)(F)F)(F)F)(C(C(C(F)(F)F)(F)F)(F)F)(F)F	C8BrF17	498.96	FDA		others	Others	Others	Others	Perflubron can be emulsified with egg phospholipids (EYP) and displays exceptionally fast excretion characteristics. Perflubron(1-Bromoheptadecafluorooctane; Heptadecafluorooctyl bromide; Perfluorooctyl bromide) is a contrast medium for magnetic resonance imaging and sonography.	Perflubron, From Wikipedia, the free encyclopedia
T15477	Hexaminolevulinate hydrochloride	Hexyl 5-aminolevulinate hydrochloride; P-1206; 5-Aminolevulinic acid hexyl ester hydrochloride	140898-91-5	CCCCCCOC(=O)CCC(=O)CN.Cl	C11H22ClNO3	251.75	FDA		cancer	Others	Others	Others	Hexaminolevulinate hydrochloride has approved for cystoscopic detection of papillary bladder cancer and it also is a fluorescent agent.	Rose JB, et al. Budget impact of incorporating one instillation of hexaminolevulinate hydrochloride blue-light cytoscopy in transurethral bladder tumour resection for patients with non-muscle-invasive bladder cancer in Sweden. BJU Int. 2015 Aug 25. doi: 1
T13013	Sodium stibogluconate	Stibogluconate trisodium nonahydrate	16037-91-5	O=[Sb](O[C@]1([H])[C@H](O)CO)(O[C@@H](C(O)=O)[C@H]1O)O[Sb](O[C@]2([H])[C@H](O)CO)(O[C@@H](C(O)=O)[C@H]2O)=O.O.O.O.O.O.O.O.O.O.[Na+].[Na+].[Na+]	C12H38Na3O26Sb2	910.9	NMPA		infection	Metabolism	Phosphatase	Phosphatase	Sodium stibogluconate is a potent protein tyrosine phosphatase inhibitor.	Pathak MK, et al. Sodium stibogluconate is a potent inhibitor of protein tyrosine phosphatases and augments cytokine responses in hemopoietic cell lines. J Immunol. 2001 Sep 15;167(6):3391-7.
T12952	Sodium citrate dihydrate	Trisodium citrate dihydrate; Citric acid trisodium salt dihydrate	6132-04-3	C(C(=O)[O-])C(CC(=O)[O-])(C(=O)[O-])O.O.O.[Na+].[Na+].[Na+]	C6H9Na3O9	294.1	PMDA;NMPA		others	Microbiology/virology	Antibacterial	Bacterial	Sodium citrate dihydrate is an anticoagulant, and also used as a buffer and food preservatives.	Adcock DM, et al. Effect of 3.2% vs 3.8% sodium citrate concentration on routine coagulation testing. Am J Clin Pathol. 1997 Jan;107(1):105-10.
TQ0064	Peretinoin	NIK333	81485-25-8	CC(=CCC/C(=C/CC/C(=C/C=C/C(=C/C(=O)O)/C)/C)/C)C	C20H30O2	302.45	EMA		Cancer	Autophagy; GPCR/G Protein; Metabolism; Microbiology/virology; Proteases/Proteasome	Autophagy; HCV Protease; Retinoid Receptor; S1P Receptor	Autophagy; HCV; RAR; RAR/RXR; RXR; SphK	Peretinoin is an oral acyclic retinoid with a vitamin A-like structure that targets retinoid nuclear receptors such as RXR and RAR.	Honda M, et al. Peretinoin, an acyclic retinoid, improves the hepatic gene signature of chronic hepatitis C following curative therapy of hepatocellular carcinoma. BMC Cancer. 2013 Apr 15;13:191.
T8907	Minaprine dihydrochloride		25953-17-7	CC1=CC(C2=CC=CC=C2)=NN=C1NCCN3CCOCC3.Cl.Cl	C17H24Cl2N4O	371.3	other countries		nervous system	Neuroscience	MAO; monoamine oxidase	MAO-A; Monoamine Oxidase	Minaprine dihydrochloride is a reversible MAO-A inhibitor; It weakly inhibit acetylcholinesterase. Minaprine dihydrochloride is an antidepressant for treatment of depression.	Contreras JM, et al. Aminopyridazines as acetylcholinesterase inhibitors. J Med Chem. 1999 Feb 25;42(4):730-41.
T21458	Sermorelin acetate	GHRH (1-29); Sermorelin acetate	114466-38-5	CC[C@H](C)[C@@H](C(=O)N[C@@H](CC1=CC=CC=C1)C(=O)N[C@@H]([C@@H](C)O)C(=O)N[C@@H](CC(=O)N)C(=O)N[C@@H](CO)C(=O)N[C@@H](CC2=CC=C(C=C2)O)C(=O)N[C@@H](CCCNC(=N)N)C(=O)N[C@@H](CCCCN)C(=O)N[C@@H](C(C)C)C(=O)N[C@@H](CC(C)C)C(=O)NCC(=O)N[C@@H](CCC(=O)N)C(=O)N[C@@H](CC(C)C)C(=O)N[C@@H](CO)C(=O)N[C@@H](C)C(=O)N[C@@H](CCCNC(=N)N)C(=O)N[C@@H](CCCCN)C(=O)N[C@@H](CC(C)C)C(=O)N[C@@H](CC(C)C)C(=O)N[C@@H](CCC(=O)N…	C151H250N44O44S	3417.99	FDA		others	Others	Others	Others	Sermorelin acetate is a growth hormone-releasing hormone (GHRH) analog, is used as a diagnostic agent to assess growth hormone (GH) secretion. It is also used as a doping agent in sports due to its correlation with the increased growth of muscular and skeletal tissue.	Knoop A, Thomas A, Fichant E,et al. Qualitative identification of growth hormone-releasing hormones in human plasma by means of immunoaffinity purification and LC-HRMS/MS. Anal Bioanal Chem. 2016 May;408(12):3145-53. doi: 10.1007/s00216-016-9377-3. Epub 2016 Feb 15. PubMed PMID: 26879649; PubMed Central PMCID: PMC4830873.
T21418	Lisinopril	Prinivil; Zestril; Linopril; Lisipril	76547-98-3	O=C(O)[C@H]1N(C([C@H](CCCCN)N[C@H](C(O)=O)CCC2=CC=CC=C2)=O)CCC1	C21H31N3O5	405.49	FDA		Cardiovascular system	Endocrinology/Hormones	RAAS	ACE	Lisinopril, the angiotensin-converting enzyme (ACE) inhibitor, is used primarily in the treatment of high heart failure, blood pressure, and heart attacks. It is also used for preventing eye and kidney complications in people with diabetes.	Akintunde JK, Bolarin OE, Akintunde DG. Garlic capsule and selenium-vitamins ACE combination therapy modulate key antioxidant proteins and cellular adenosine triphosphate in lisinopril-induced lung damage in rats. Drug Metabol Personal Ther. 2016 Mar 1;31(1):47-54. doi: 10.1515/dmpt-2015-0035. PubMed PMID: 26943616.
T20879	Tacrolimus monohydrate	Tacrolimus hydrate; FR 900506; FR900506; LCP-Tacro; Prograf; FK 506; FK-506	109581-93-3	O=C([C@@](CCCC1)([H])N1C(C([C@@]2(O)[C@H](C)C[C@H](OC)[C@@](O2)([H])[C@@H](OC)C[C@@H](C)C/C(C)=C/[C@H]3CC=C)=O)=O)O[C@H](/C(C)=C/[C@H]4C[C@@H](OC)[C@H](O)CC4)[C@H](C)[C@@H](O)CC3=O.O	C44H71NO13	822.05	FDA		immune system	Autophagy; Metabolism; Microbiology/virology	Antibacterial; Antibiotic; Autophagy; Phosphatase	Antibiotic; Autophagy; BacteriaL; FKBP; Phosphatase	Tacrolimus hydrate is a macrolide from the culture broth of a strain of Streptomyces tsukubaensis, binds to FK506 binding protein (FKBP) to form a complex. Tacrolimus inhibits calcineurin phosphatase, which inhibits T-lymphocyte signal transduction and IL-2 transcription. Immunosuppressive properties. It prevents the activation of T-lymphocytes in response to antigenic or mitogenic stimulation in…	Dodi PL. Immune-mediated keratoconjunctivitis sicca in dogs: current perspectives on management. Vet Med (Auckl). 2015 Oct 30;6:341-347. doi: 10.2147/VMRR.S66705. eCollection 2015. Review. PubMed PMID: 30101119; PubMed Central PMCID: PMC6067592.
T17226	Vericiguat	BAY1021189	1350653-20-1	COC(=O)NC1=C(N=C(N=C1N)C2=NN(C3=C2C=C(C=N3)F)CC4=CC=CC=C4F)N	C19H16F2N8O2	426.38	FDA		Cardiovascular system	GPCR/G Protein	Guanylate cyclase	guanylate cyclase	Vericiguat is a potent and orally available guanylate cyclase stimulator.	Follmann M, et al. Discovery of the Soluble Guanylate Cyclase Stimulator Vericiguat (BAY 1021189) for the Treatment of Chronic Heart Failure. J Med Chem. 2017 Jun 22;60(12):5146-5161.
TQ0152	Dalfopristin	RP54476	112362-50-2	O=S(CCN(CC)CC)([C@H]1[C@@](C(O[C@H]([C@@H](/C=C/C(NC/C=C\C(C)=C\2)=O)C)C(C)C)=O)([H])N(C(C3=COC(CC(C[C@@H]2O)=O)=N3)=O)CC1)=O	C34H48N4O9S	690.85	FDA		Infection	Microbiology/virology	Antibacterial; Antibiotic	Antibiotic; Bacterial	Dalfopristin is a semi-synthetic streptogramin antibiotic. Quinupristin/Dalfopristin (Q/D) is used for the treatment of multi-drug resistant Enterococcus faecium infections.	Wang S, et al. Characteristic of Enterococcus faecium clinical isolates with quinupristin/Dalfopristin resistance in China. BMC Microbiol. 2016 Oct 21;16(1):246.
T17030	Tegoprazan		942195-55-3	CC1=NC2=C(N1)C=C(C=C2O[C@H]3CCOC4=C3C(=CC(=C4)F)F)C(=O)N(C)C	C20H19F2N3O3	387.38	Other countries		Digestive system	Membrane transporter/Ion channel	ATPase; Proton pump	H+/K+-ATPase; Proton Pump	Tegoprazan is a potassium-competitive acid blocker and is a potent, oral active, and highly selective inhibitor of gastric H+/K+-ATPase. That could control gastric acid secretion and motility (IC50: ranging from 0.29-0.52 μM for porcine, canine, and human H+/K+-ATPases in vitro).	Takahashi N, et al. Tegoprazan, a Novel Potassium-Competitive Acid Blocker to Control Gastric Acid Secretion and Motility. J Pharmacol Exp Ther. 2018 Feb;364(2):275-286.
T19651	Isoflurane	HSDB 8057; HSDB-8057; HSDB8057; Forane; Terrell	26675-46-7	C(C(F)(F)F)(OC(F)F)Cl	C3H2ClF5O	184.49	FDA		nevous system	Others	Others	Others	Isoflurane is a stable, non-explosive inhalation anesthetic that has been reported to induce caspase-3 activation.	Olutoye OA, Sheikh F, Zamora IJ, Yu L, Akinkuotu AC, Adesina AM, Olutoye OO. Repeated isoflurane exposure and neuroapoptosis in the midgestation fetal sheep brain. Am J Obstet Gynecol. 2016 Apr;214(4):542.e1-8. doi: 10.1016/j.ajog.2015.10.927. Epub 2015 Nov 4. PubMed PMID: 26546852.
T22713	Decloxizine		3733-63-9	C1CN(CCN1CCOCCO)C(C2=CC=CC=C2)C3=CC=CC=C3	C21H28N2O2	340.46	NMPA		immune systym	GPCR/G Protein; Immunology/Inflammation; Neuroscience	Histamine Receptor	H1 receptor; Histamine Receptor	Decloxizine is a H1 receptor antagonist	Farmer LJ, Ledeboer MW, Hoock T, et al. Discovery of VX-509 (Decernotinib): A Potent and Selective Janus Kinase 3 Inhibitor for the Treatment of Autoimmune Diseases. J Med Chem, 2015, 58(18): 7195-7216.
T21358	Dalbavancin	Dalbavancin HCl; A-A 1; BI397; BI-397; BI 397; VER 001; VER-001	171500-79-1	O[C@@H]([C@@H](O)[C@@H]1O)[C@H](O[C@@H]1CO)OC2=C(C3=CC([C@@](C4=O)([H])NC([C@@](NC([C@](NC([C@@](NC5=O)([H])C6)=O)([H])C(C=C7OC(C=C8[C@H]5NC)=C(C=C8)O)=C(C(O)=C7)Cl)=O)([H])C9=CC%10=C(O[C@H](O[C@H](C(O)=O)[C@@H](O)[C@@H]%11O)[C@@H]%11NC(CCCCCCCCC(C)C)=O)C(OC%12=CC=C6C=C%12)=C9)=O)=CC=C3O)C([C@@](NC([C@](N4)([H])[C@@H](C%13=CC=C(O%10)C(Cl)=C%13)O)=O)([H])C(NCCCN(C)C)=O)=CC(O)=C2.[H]Cl	C88H101Cl3N10O28	1853.17	FDA		inflammation	Microbiology/virology	Antibacterial; Antibiotic	antibiotic; Bacterial	Dalbavancin, a novel second-generation lipoglycopeptide antibiotic, possesses in vitro activity against a variety of Gram-positive pathogens including methicillin-resistant Staphylococcus aureus (MRSA) and methicillin-resistant Staphylococcus epidermidis (MRSE),Dalbavancin hydrochloride inhibits Staphylococcus aureus and Bacillus anthracis with MIC90s of 0.06 μg/mL and 0.25 μg/mL, respectively	Scoble PJ, Owens RC Jr, Puttagunta S, Yen M, Dunne MW. Pharmacokinetics, Safety, and Tolerability of a Single 500-mg or 1000-mg Intravenous Dose of Dalbavancin in Healthy Japanese Subjects. Clin Drug Investig. 2015 Oct 12. [Epub ahead of print] PubMed PMID: 26458939.
T20615	Olsalazine	Dipentium; Salicylic acid	15722-48-2	C1=CC(=C(C=C1N=NC2=CC(=C(C=C2)O)C(=O)O)C(=O)O)O	C14H10N2O6	302.24	FDA		inflammation	Others	Others	Others	Olsalazine, an anti-inflammatory drug, is used in the treatment of inflammatory bowel disease. It is also a novel DNA hypomethylating agent.	El-Kawy OA, Ibrahim IT, Farah K. Technetium-99 m labeling and evaluation of olsalazine: a novel agent for ulcerative colitis imaging. J Labelled Comp Radiopharm. 2015 Jun 30;58(8):336-41. doi: 10.1002/jlcr.3306. Epub 2015 Jun 1. PubMed PMID: 26031480.
T22258	Sotorasib racemate	AMG-510 racemate	2252403-56-6	C[C@H]1CN(CCN1C2=NC(=O)N(C3=NC(=C(C=C32)F)C4=C(C=CC=C4F)O)C5=C(C=CN=C5C(C)C)C)C(=O)C=C	C30H30F2N6O3	560.59	FDA;PMDA		Cancer	GPCR/G Protein; MAPK	Ras	KRAS G12C; Ras	AMG-510 racemate is a racemic of AMG-510 which is a potent inhibitor of KRAS G12C covalent, and leading to potential antineoplastic activity.	Canon J , Rex K , Saiki A Y , et al. The clinical KRAS(G12C) inhibitor AMG 510 drives anti-tumour immunity[J]. Nature, 2019, 575(7781).
T22253	AG-120 (racemic)		1448346-63-1	O=C1CC[C@@H](C(N(C(C(NC2CC(F)(F)C2)=O)C3=CC=CC=C3Cl)C4=CC(F)=CN=C4)=O)N1C5=NC=CC(C#N)=C5	C28H22ClF3N6O3	582.96	FDA		Immune system	Metabolism	Dehydrogenase	IDH1	AG-120 (racemic), the racemic mixture of AG-120, is an orally available isocitrate dehydrogenase type 1 (IDH1) inhibitor, and shows potential antineoplastic activity.	M Cecilia Caino, Dario C Altieri. Clin Cancer Res. 2016 Feb 1;22(3):540-5.
T13693	Fibrin		9001-31-4	CNC(=O)CNC(=O)CN	C5H11N3O2	145.16	NMPA		others	Others	Others	Others	Fibrin is the major component of the blood clot and is used for coagulation.Fibrin, isolated from bovine blood, is an insoluble protein produced in response to bleeding.	Paulson CN, et al. The anti-parasitic agent suramin and several of its analogues are inhibitors of the DNA bindingprotein Mcm10. Open Biol. 2019 Aug 30;9(8):190117.
T14935	Elexacaftor	VX-445	2216712-66-0	C[C@H]1CC(N(C1)C2=C(C=CC(=N2)N3C=CC(=N3)OCC(C)(C)C(F)(F)F)C(=O)NS(=O)(=O)C4=CN(N=C4C)C)(C)C	C26H34F3N7O4S	597.65	FDA		others	Autophagy; Membrane transporter/Ion channel	Autophagy; CFTR	Autophagy; CFTR	Elexacaftor is a modulator of cystic fibrosis transmembrane conductance regulator (CFTR) and it also facilitates the processing and trafficking of CFTR to increase the amount of CFTR at the cell surface.	Alexander Russell Abela, et al. MODULATOR OF THE CYSTIC FIBROSIS TRANSMEMBRANE CONDUCTANCE REGULATOR , PHARMACEUTICAL COMPOSITIONS , METHODS OF TREATMENT , AND PROCESS FOR MAKING THE MODULATOR. US 20180162839 A1.
T8847	Fosravuconazole L-lysine ethanolate	BMS-379224 L-lysine ethanolate; E-1224 L-lysine ethanolate	914361-45-8	N#CC1=CC=C(C2=CSC([C@H](C)[C@@](OCOP(O)(O)=O)(C3=CC=C(F)C=C3F)CN4N=CN=C4)=N2)C=C1.CCO.N[C@H](C(O)=O)CCCCN	C31H40F2N7O8PS	739.7	PMDA		infection	Microbiology/virology	Antifungal; Parasite	Fungal; Parasite	FosravuconazoleL-lysine ethanolate is a broad-spectrum antifungal agent. In Japan, it is approved for the treatment of onychomycosis, a fungal infection of the nail. It is a prodrug that is converted into ravuconazole.	Diniz LF, Mazzeti AL, Caldas IS, Ribeiro I, Bahia MT. Outcome of E1224-Benznidazole Combination Treatment for Infection with a Multidrug-Resistant Trypanosoma cruzi Strain in Mice. Antimicrob Agents Chemother. 2018;62(6):e00401-18. Published 2018 May 25. doi:10.1128/AAC.00401-18Watanabe S, Tsubouchi I, Okubo A. Efficacy and safety of fosravuconazole L-lysine ethanolate, a novel oral triazole anti…
T13920L	Terlipressin Acetate	Terlipressin diacetate anhydrous; Terlipressin acetate anhydrous	1884420-36-3	O=C([C@H](CSSC[C@@H](C(N[C@H](C1=O)CC2=CC=C(O)C=C2)=O)NC(CNC(CNC(CN)=O)=O)=O)NC([C@@H](NC([C@@H](NC([C@](N1)([H])CC3=CC=CC=C3)=O)CCC(N)=O)=O)CC(N)=O)=O)N(CCC4)[C@@H]4C(N[C@@H](CCCCN)C(NCC(N)=O)=O)=O.CC(O)=O.CC(O)=O	C56H82N16O19S2	1347.5	NMPA		Others	GPCR/G Protein	Vasopressin Receptor	Vasopressin Receptor; vasopressin V1	Terlipressin, a highly selective vasopressin V1 receptor agonist, on oxygen and glucose deprivation/re-oxygenation (OGD/R)-induced damage in intestinal epithelial cells (IEC-6).Terlipressin acetate exerts anti-inflammatory and anti-oxidative effects. Terlipressin acetate has the potential for hepatorenal syndrome and norepinephrine-resistant septic shock research.	Liu ZM, Zhang XY, Chen J, Shen JT, Jiang ZY, Guan XD. Terlipressin protects intestinal epithelial cells against oxygen-glucose deprivation/re-oxygenation injury via the phosphatidylinositol 3-kinase pathway. Exp Ther Med. 2017;14(1):260-266. doi:10.3892/etm.2017.4502
TP1016L	Aviptadil Acetate	Vasoactive Intestinal Peptide acetate salt	1444827-29-5	OC(C=C1)=CC=C1C[C@@H](C(N[C@@H](CC(C)C)C(N[C@@H](CC(N)=O)C(N[C@@H](CO)C(N[C@@H]([C@@H](C)CC)C(N[C@@H](CC(C)C)C(N[C@H](C(N)=O)CC(N)=O)=O)=O)=O)=O)=O)=O)NC([C@H](CCCCN)NC([C@H](CCCCN)NC([C@H](C(C)C)NC([C@H](C)NC([C@H](CCSC)NC([C@H](CCC(N)=O)NC([C@H](CCCCN)NC([C@H](CCCNC(N)=N)NC([C@H](CC(C)C)NC([C@H](CCCNC(N)=N)NC([C@H]([C@H](O)C)NC([C@@H](NC([C@H](CC(N)=O)NC([C@H](CC(O)=O)NC([C@H]([C@H](O)C)NC([C@@…	C147H238N44O42S.C2H4O2	3385.9	EMA		Digestive system	Endocrinology/Hormones; Microbiology/virology	RAAS; SARS-CoV	ACE; SARS-CoV; SARS-CoV-2	Avitadil acetate induces pulmonary vasodilation and inhibits the proliferation of vascular SMCs and platelet aggregation. Avitadil acetate can be used for research on pulmonary fibrosis, pulmonary hypertension (PAH), and respiratory failure caused by SARS-CoV-2.	Frye BC, Meiss F, von Bubnoff D, Zissel G, Müller-Quernheim J. Vasoactive Intestinal Peptide in Checkpoint Inhibitor-Induced Pneumonitis. N Engl J Med. 2020;382(26):2573-2574. doi:10.1056/NEJMc2000343
T8835	Tosufloxacin hydrochloride	A-61827 hydrochloride; T-3262 hydrochloride	104051-69-6	FC1=CC(F)=C(N2C=C(C(O)=O)C(C3=C2N=C(N4CCC(N)C4)C(F)=C3)=O)C=C1.Cl	C19H16ClF3N4O3	440.8	NMPA;PMDA		infection	Microbiology/virology	Antibacterial	bacterial DNA gyrase	Tosufloxacin hydrochloride is a fluoroquinolone antibacterial agent used to treat bacterial infections.Tosufloxacin hydrochloride is also a bacterial Topo (DNA gyrase, topoisomerase)) inhibitor.	Li T , Wang J , Cao Q , et al. Identification of Novel Genes Involved in Escherichia coli Persistence to Tosufloxacin[J]. Frontiers in Cellular and Infection Microbiology, 2020, 10:581986.
T21231	Almotriptan	Almotriptan; LAS 31416	154323-57-6	c1c(cc2c(c[nH]c2c1)CCN(C)C)CS(N1CCCC1)(=O)=O	C17H25N3O2S	335.47	FDA;PMDA;NMPA		nervous system	GPCR/G Protein; Neuroscience	5-HT Receptor	5-HT Receptor; 5-HT1B/1D	Almotriptan is a 5-HT1B/1D-receptor agonist used to treat migraine.Almotriptan is a triptan drug for treatment of migraine headaches.Binding of the drug to the receptor leads to vasoconstriction of the cranial blood vessels and thus affects the redistribution of cranial blood flow. Almotriptan significantly increases cerebral blood flow and reduces blood flow through extracerebral cranial vessels.	Abbas Z, Marihal S. Gellan gum-based mucoadhesive microspheres of almotriptan for nasal administration: Formulation optimization using factorial design, characterization, and in vitro evaluation. J Pharm Bioallied Sci. 2014 Oct;6(4):267-77. doi: 10.4103/0975-7406.142959. PubMed PMID: 25400410; PubMed Central PMCID: PMC4231387.
T21013	Clomipramine	Clomipramine; Anafranil (free base); Anafranil; Chlorimipramine; Clomicalm; Clomipramina	303-49-1	N1(CCCN(C)C)c2c(CCc3ccccc13)ccc(c2)Cl	C19H23ClN2	314.86	FDA		nervous system	GPCR/G Protein; Neuroscience	5-HT Receptor	5-HT	Clomipramine is a tricyclic antidepressant (TCA). It is used for the treatment of the panic disorder, obsessive-compulsive disorder, major depressive disorder, and chronic pain. It may decrease the risk of suicide in those over the age of 65. It is similar to Imipramine in that selective inhibition of the serotonin uptake in the brain.	Yildirim EA, Hacioglu Yildirim M, Carpar E, Sarac I. Clomipramine trial for treatment-resistant persistent genital arousal disorder: a case series. J Psychosom Obstet Gynaecol. 2017 Dec;38(4):260-267. doi: 10.1080/0167482X.2017.1296427. Epub 2017 Mar 3. PubMed PMID: 28635538.
T22344	Icatibant Acetate		138614-30-9	CC(=O)O.N[C@H](CCCNC(=N)N)C(=O)N[C@@H](CCCNC(=N)N)C(=O)N1CCC[C@H]1C(=O)N2C[C@H](O)C[C@H]2C(=O)NCC(=O)N[C@@H](Cc3cccs3)C(=O)N[C@@H](CO)C(=O)N4Cc5ccccc5C[C@@H]4C(=O)N6[C@H]7CCCC[C@H]7C[C@H]6C(=O)N[C@@H](CCCNC(=N)N)C(=O)O	C61H93N19O15S	1364.57	FDA		others	GPCR/G Protein	Bradykinin Receptor	bradykinin B2; Bradykinin Receptor	Icatibant Acetate, an antagonist of the bradykinin B2 receptor, is used in the treatment of hereditary angioedema.	Charignon D, et al. Expert Opin Pharmacother. 2012, 13(15):2233-47.
T16398	Opicapone	BIA 9-1067	923287-50-7	OC1=CC(C2=NC(C3=C(Cl)[N+]([O-])=C(C)C(Cl)=C3C)=NO2)=CC([N+]([O-])=O)=C1O	C15H10Cl2N4O6	413.17	FDA		nervous system	Metabolism	Transferase	COMT	Opicapone reduces the ATP content of the cells (IC50: 98 μM). Opicapone is an effective third-generation catechol-O-methyltransferase inhibitor for the research of Parkinson's disease and motor fluctuations.	Bonifácio MJ, et al. Pharmacological profile of Opicapone, a third-generation nitrocatechol catechol-O-methyl transferase inhibitor, in the rat. Br J Pharmacol. 2015 Apr;172(7):1739-52.
T14998	Copanlisib dihydrochloride	BAY 80-6946 dihydrochloride	1402152-13-9	O=C(C1=CN=C(N)N=C1)NC2=NC3=C(C=CC(OCCCN4CCOCC4)=C3OC)C5=NCCN25.[H]Cl.[H]Cl	C23H30Cl2N8O4	553.44	FDA		Cancer	Apoptosis; PI3K/Akt/mTOR signaling	Apoptosis; mTOR; PI3K	Apoptosis; mTOR; PI3K; PI3Kα; PI3Kβ; PI3Kγ; PI3Kδ	Copanlisib dihydrochloride is an ATP-competitive pan-class I PI3K inhibitor (IC50s: 0.5 nM, 0.7 nM, 3.7 nM and 6.4 nM for PI3Kα, PI3Kδ, PI3Kβ and PI3Kγ). Copanlisib dihydrochloride has superior antitumor activity and it also has more than 2,000-fold selectivity against other lipid and protein kinases, except for mTOR.	Liu N, et al. Mol Cancer Ther. 2013, 12(11), 2319-2330.
T12039	Miglustat	N-Butyldeoxynojirimycin; NB-DNJ; OGT918	72599-27-0	O[C@H]1[C@H](O)[C@@H](CO)N(CCCC)C[C@@H]1O	C10H21NO4	219.28	FDA		Metabolism	Others	Others	Others	Miglustat is an alkylated product of imino sugar deoxynojirimycin.It is an inhibitor of glucosylceramide synthase, primarily to treat Type I Gaucher disease (GD1).	Abian, O., et al., Therapeutic strategies for Gaucher disease: miglustat (NB-DNJ) as a pharmacological chaperone for glucocerebrosidase and the different thermostability of velaglucerase alfa and imiglucerase. Mol Pharm, 2011. 8(6): p. 2390-7.
TQ0165	Arglabin	(+)-Arglabin	84692-91-1	C[C@]1(CC[C@](C2=C)([H])[C@@](OC2=O)([H])[C@@]3([H])C(C)=CC4)[C@]34O1	C15H18O3	246.3	Other countries		Cancer	Autophagy; Immunology/Inflammation; NF-κB; Metabolism	Autophagy; NOD; NOD-like Receptor (NLR); Transferase	Autophagy; Farnesyl Transferase; NLRP3; NOD-like Receptor (NLR)	Arglabin is a natural product isolated from Artemisia glabella, is a NLRP3 inflammasome inhibitor, has anti-atherogenic and anticancer effects.	Bottex-Gauthier C, et al. In vitro biological activities of arglabin, a sesquiterpene lactone from the Chinese herb Artemisia myriantha Wall. (Asteraceae). Biotechnol Ther. 1993;4(1-2):77-98.
T3131	Fosfomycin calcium	Phosphomycin calcium salt	26016-98-8	C[C@H]1O[C@H]1P([O-])([O-])=O.[Ca+2]	C3H5CaO4P	176.12	NMPA,PMDA,Canada		Urinary system	Microbiology/virology	Antibacterial; Antibiotic	Antibiotic; Bacterial	Fosfomycin calcium is a blood-brain barrier penetrating, broad-spectrum antibiotic by irreversibly inhibiting an early stage in cell wall synthesis.	ijkmans AC, et al. Fosfomycin: Pharmacological, Clinical and Future Perspectives. Antibiotics (Basel). 2017 Oct 31;6(4). pii: E24.
T8802	2,4-Dioxaspiro(5.5)undec-8-ene, 3-(2-furanyl)-	Trypsin inhibitor (human urine urinastatin protein moiety)	80499-32-7	C1(C2=CC=CO2)OCC3(CC=CCC3)CO1	C13H16O3	220.26	NMPA;PMDA		Cardiovascular system	Others	Others	urinary trypsin inhibitor (UTI)	Trypsin inhibitor (human urine urinastatin protein moiety)， as an urinary trypsin inhibitor (UTI), is a glycoprotein that is isolated from healthy human urine or synthetically produced.	Cao C , Yin C , Shou S , et al. Ulinastatin Protects Against LPS-Induced Acute Lung Injury By Attenuating TLR4/NF-κB Pathway Activation and Reducing Inflammatory Mediators[J]. Shock, 2018, 50(5):1.
T8807	Benzydamine		642-72-8	CN(C)CCCOC1=NN(CC2=CC=CC=C2)C3=C1C=CC=C3	C19H23N3O	309.4	NMPA		Inflammation	Others	Others	Others	Benzydamine is a benzyl-indazole having analgesic, antipyretic, and anti-inflammatory effects. Benzydamine is used to reduce post-surgical and post-traumatic pain and edema and to promote healing.	N P Singh, J K Makkar, V Wourms, P M Singh.Topical benzydamine for preventing postoperative sore throat.Anaesthesia. 2018 Oct;73(10):1297.
T8825	Capmatinib 2HCl.H2O	INC-280 hydrochloride; INCB28060 hydrochloride; NVP-INC280	1865733-40-9	O=C(NC)C1=CC=C(C2=NN3C(N=C2)=NC=C3CC4=CC=C5N=CC=CC5=C4)C=C1F.[H]Cl.[H]Cl.[H]O[H]	C23H21Cl2FN6O2	503.4	FDA		Cancer	Tyrosine Kinase/Adaptors	c-Met/HGFR	c-Met	Capmatinib hydrochloride is an orally bioavailable inhibitor of the proto-oncogene c-Met (HGFR)with potential antineoplastic activity.	Baltschukat S, et al. Capmatinib (INC280) Is Active Against Models of Non-Small Cell Lung Cancer and Other Cancer Types with Defined Mechanisms of MET Activation. Clin Cancer Res. 2019 May 15;25(10):3164-3175.
T21422	Methylnaltrexone bromide	MOA-728; MOA 728; MOA728; Methylnaltrexone; Relistor	73232-52-7	O=C1[C@@](OC2=C(O)C=CC3=C24)([H])[C@@]54CC[N+](C)(CC6CC6)[C@@](C3)([H])[C@]5(O)CC1.[Br-]	C21H26BrNO4	436.35	FDA		Digestive system	Endocrinology/Hormones; GPCR/G Protein; Neuroscience	Opioid Receptor	Opioid Receptor; μ-opioid receptor	Methylnaltrexone, used in form of methylnaltrexone bromide, is one of the newer agents of peripherally-acting μ-opioid antagonists. Methylnaltrexone acts to reverse some of the side effects of opioid drugs such as constipation without affecting analgesia or precipitating withdrawals.	Rauck RL. Treatment of opioid-induced constipation: focus on the peripheral μ-opioid receptor antagonist methylnaltrexone. Drugs. 2013 Aug;73(12):1297-306. doi: 10.1007/s40265-013-0084-5. Review. PubMed PMID: 23881667.
T21395	Finerenone	BAY94-8862; BAY 94-8862; BAY-94-8862; BAY948862; BAY 948862; BAY-948862	1050477-31-0	O=C(C1=C(C)NC2=C(C(OCC)=NC=C2C)[C@@H]1C3=CC=C(C#N)C=C3OC)N	C21H22N4O3	378.43	FDA		Urinary system	Endocrinology/Hormones	Glucocorticoid Receptor	Mineralocorticoid Receptor	Finerenone is a third-generation, selective, and orally available nonsteroidal mineralocorticoid receptor (MR) antagonist with IC50 of 18 nM for the treatment of chronic heart failure. Finerenone displays excellent selectivity versus glucocorticoid receptor (GR), androgen receptor (AR), and progesterone receptor (>500-fold).	George L Bakris , Rajiv Agarwal ,et al.Effect of Finerenone on Albuminuria in Patients With Diabetic Nephropathy: A Randomized Clinical Trial.JAMA. 2015 Sep 1;314(9):884-94.
T21023	Bedaquiline fumarate	R403323; R 403323; R-403323; TMC207; TMC-207; TMC 207	845533-86-0	O[C@](CCN(C)C)(C1=C2C=CC=CC2=CC=C1)[C@@H](C3=CC4=CC(Br)=CC=C4N=C3OC)C5=CC=CC=C5.O=C(O)/C=C/C(O)=O	C36H35BrN2O6	671.59	FDA		Respiratory system	Microbiology/virology	Antibacterial; Antibiotic	Antibiotic; Bacterial	Bedaquiline fumarate, a diarylquinoline antibiotic that targets ATP synthase, is effective for the treatment of Mycobacterium tuberculosis infections. It blocks the proton pump for ATP synthase of mycobacteria. It is the first member of a new class of drugs called diarylquinolines.	Hafkin J, Hittel N, Martin A, Gupta R. Compassionate Use of Delamanid in Combination with Bedaquiline for the Treatment of MDR-TB. Eur Respir J. 2018 Oct 25. pii: 1801154. doi: 10.1183/13993003.01154-2018. [Epub ahead of print] PubMed PMID: 30361253.
T22355	L-Thyroxine sodium	Levothyroxine sodium; L-T4 sodium; L-Thyroxine sodium; LT4 sodium	55-03-8	N[C@@H](CC1=CC(I)=C(OC2=CC(I)=C(O)C(I)=C2)C(I)=C1)C(O[Na])=O	C15H10I4NO4.Na	798.85	FDA		Metabolism	Endocrinology/Hormones	Thyroid hormone receptor(THR)	THR; Thyroid Hormone	Levothyroxine, the major hormone derived from the thyroid gland, is the agonist of Thyroid hormone receptor alpha and beta.	Mitin T, et al. Drug Metab Dispos. 2004, 32(8):779-82.
T11176	Eliglustat hemitartrate	Genz-112638; Eliglustat tartrate	928659-70-5	CCCCCCCC(N[C@H](CN1CCCC1)[C@@H](C2=CC=C(OCCO3)C3=C2)O)=O.CCCCCCCC(N[C@H](CN4CCCC4)[C@@H](C5=CC=C(OCCO6)C6=C5)O)=O.O=C(O)[C@H](O)[C@@H](O)C(O)=O	C50H78N4O14	959.17	FDA		Metabolism	Others	Others	glucocerebroside synthase	Eliglustat Hemitartrate, with an IC50 of 24 nM, is a specific, potent, oral active glucocerebral glycosidase inhibitor.	McEachern KA, et al. A specific and potent inhibitor of glucosylceramide synthase for substrate inhibition therapy ofGaucher disease. Mol Genet Metab. 2007 Jul;91(3):259-67.
T15393	Glycerol phenylbutyrate	HPN-100	611168-24-2	O=C(CCCC1=CC=CC=C1)OC(COC(CCCC2=CC=CC=C2)=O)COC(CCCC3=CC=CC=C3)=O	C33H38O6	530.65	FDA		Metabolism	GPCR/G Protein	Sigma receptor	Sigma Receptor; σ2	Glycerol phenylbutyrate (GPB) is a new generation ammonia scavenger drug and it also is a sigma-2 (σ2) receptor ligand (pKi: 8.02).	Rescifina A, et al. Development of a Sigma-2 Receptor affinity filter through a Monte Carlo based QSAR analysis. Eur J Pharm Sci. 2017 Aug 30;106:94-101.
T17026	Tecovirimat	ST-246	869572-92-9	O=C(NN(C([C@]1([H])[C@@]2([H])[C@@](C3)([H])[C@@]3([H])[C@@](C=C2)([H])[C@]41[H])=O)C4=O)C5=CC=C(C(F)(F)F)C=C5	C19H15F3N2O3	376.33	FDA		infection	Proteases/Proteasome	Cysteine Protease	Cysteine protease	Tecovirimat is a core protein cysteine protease inhibitor potentially for treatment of smallpox infection.Tecovirimat is a novel antiviral potent and selective activity against multiple orthopoxviruses (EC50: about 10 nM). that inhibits the egress of orthopoxviruses by targeting viral p37 protein orthologs.Tecovirimat has shown efficacy in all small animal and nonhuman primate prophylaxis and the…	Yang G, et al. An orally bioavailable antipoxvirus compound (ST-246) inhibits extracellular virus formation and protects mice from lethal orthopoxvirus Challenge. J Virol. 2005 Oct;79(20):13139-49.
T10570	Fostemsavir Tris	BMS-663068 Tris; FOSTEMSAVIR TROMETHAMINE	864953-39-9	O=C(N1CCN(C(C2=CC=CC=C2)=O)CC1)C(C3=CN(COP(O)(O)=O)C4=C3C(OC)=CN=C4N5N=C(C)N=C5)=O.OCC(CO)(N)CO	C29H37N8O11P	704.62	FDA		infection;Immune system	Microbiology/virology; Proteases/Proteasome	HIV Protease	HIV; HIV-1	Fostemsavir Tris is the prodrug of BMS-626529,is a oral, safe and effective inhibitor of HIV-1 attachment. It inhibits human immunodeficiency virus type 1 (HIV-1) infection by binding to gp120 and interfering with the attachment of virus to CD4+ T-cells.	Nowicka-Sans B, et al. In vitro antiviral characteristics of HIV-1 attachment inhibitor BMS-626529, the active component of the prodrug BMS-663068. Antimicrob Agents Chemother. 2012 Jul;56(7):3498-507.
T13202	Trilaciclib hydrochloride	G1T28 hydrochloride	1977495-97-8	O=C1C2=CC3=CN=C(NC4=CC=C(N5CCN(C)CC5)C=N4)N=C3N2C6(CCCCC6)CN1.[H]Cl.[H]Cl	C24H32Cl2N8O	519.47	FDA		Cancer	Cell Cycle/Checkpoint	CDK	CDK; CDK4/Cyc D1; CDK6/CyclinD3	Trilaciclib hydrochloride is an inhibitor of CDK4/6 (IC50s: 1 nM and 4 nM for CDK4 and CDK6).	Bisi JE, et al. Preclinical Characterization of G1T28: A Novel CDK4/6 Inhibitor for Reduction of Chemotherapy-Induced Myelosuppression. Mol Cancer Ther. 2016 May;15(5):783-93.
TP1035L	Cyclic somatostatin Acetate(38916-34-6(free base))	SRIF-14; Somatostatin-14	TP1035L	CC(O)=O.C[C@@H](O)[C@@H]1NC(=O)[C@H](CCCCN)NC(=O)[C@H](Cc2c[nH]c3ccccc23)NC(=O)[C@H](Cc2ccccc2)NC(=O)[C@H](Cc2ccccc2)NC(=O)[C@H](CC(N)=O)NC(=O)[C@H](CCCCN)NC(=O)[C@H](CSSC[C@H](NC(=O)[C@H](CO)NC(=O)[C@@H](NC(=O)[C@H](Cc2ccccc2)NC1=O)[C@@H](C)O)C(O)=O)NC(=O)CNC(=O)[C@H](C)N	C76H104N18O19S2	1637.88	NMPA		Digestive system;Cardiovascular system	Others	Others	Others	Cyclic somatostatin Acetate is a cyclic tetradecapeptide regulating many endocrine and nervous system functions.	NA
T8787	Drotaverine hydrochloride		985-12-6	Cl.CCOc1ccc(cc1OCC)CC2=NCCc3cc(OCC)c(OCC)cc23	C24H32ClNO4	433.97	NMPA		Digestive system	Metabolism	PDE	PDE4	Drotaverine hydrochloride is a type 4 cyclic nucleotide phosphodiesterase (PDE4) inhibitor，and is an antispasmodic drug, used to enhance cervical dilation during childbirth. Drotaverine hydrochloride is structurally related to papaverine	Patai, Zoltán, Guttman, András, Mikus E . Assessment of the Airway Smooth Muscle Relaxant Effect of Drotaverine[J]. Pharmacology, 2018:163.
T21518	Colistin methanesulfonate sodium salt	Colistin Methanesulfonate (sodium salt)	8068-28-8	[Na+].[Na+].[Na+].[Na+].[Na+].[Na+].[Na+].[Na+].[Na+].[Na+].CC(C)CCCCC(=O)N[C@@H](CCNCS([O-])(=O)=O)C(=O)N[C@@H]([C@@H](C)O)C(=O)N[C@@H](CCNCS([O-])(=O)=O)C(=O)N[C@H]1CCNC(=O)[C@@H](NC(=O)[C@H](CCNCS([O-])(=O)=O)NC(=O)[C@H](CCNCS([O-])(=O)=O)NC(=O)[C@H](CC(C)C)NC(=O)[C@@H](CC(C)C)NC(=O)[C@H](CCNCS([O-])(=O)=O)NC1=O)[C@@H](C)O.CCC(C)CCCCC(=O)N[C@@H](CCNCS([O-])(=O)=O)C(=O)N[C@@H]([C@@H](C)O)C(=O)N…	C58H105N16Na5O28S5	1749.8	FDA		Immune system;Infection	Immunology/Inflammation; Microbiology/virology	Antibacterial; Cell wall	Bacterial; cell wall	Colistin is a cyclic polypeptide antibiotic from Bacillus colistinus, composed of Polymyxins E1 and E2.	Evans ME, et al. Ann Pharmacother, 1999, 33(9), 960-967.
T8777	Beclometasone	BecloMethasone; Beclometasone	4419-39-0	[H][C@@]12C[C@H](C)[C@](O)(C(=O)CO)[C@@]1(C)C[C@H](O)[C@@]1(Cl)[C@@]2([H])CCC2=CC(=O)C=C[C@]12C	C22H29ClO5	408.92	FDA		Respiratory system	Endocrinology/Hormones	Glucocorticoid Receptor	glucocorticoid receptor	BecloMethasone is a prototype glucocorticoid receptor agonist. It is used topically as an anti-inflammatory agent and in aerosol form for the treatment of asthma.	He S, et al. Neutrophil-mediated experimental metastasis is enhanced by VEGFR inhibition in a zebrafish xenograft model. J Pathol. 2012 Aug;227(4):431-45.
T21629	Loxapine		1977-10-2	CN1CCN(CC1)C1=Nc2ccccc2Oc2ccc(Cl)cc12	C18H18ClN3O	327.81	FDA		Nervous system	GPCR/G Protein; Neuroscience	5-HT Receptor; Dopamine Receptor	5-HT Receptor; 5-HT2 (bovine); 5-HT2 (human); D2; D4	Loxapine is a D2DR and D4DR inhibitor, serotonergic receptor antagonist and also a dibenzoxazepine anti-psychotic agent,used primarily in the treatment of schizophrenia. The drug is a member of the dibenzoxazepine class and structurally related to clozapine (which belongs to the chemically akin class of dibenzodiazepines).	Berardis D D , Fornaro M , Orsolini L , et al. The Role of Inhaled Loxapine in the Treatment of Acute Agitation in Patients with Psychiatric Disorders: A Clinical Review[J]. International Journal of Molecular ences, 2017, 18(2):349.
T8747	Levofloxacin hydrochloride		177325-13-2	Cl.C[C@H]1COc2c(N3CCN(C)CC3)c(F)cc3c2n1cc(C(O)=O)c3=O	C18H21ClFN3O4	397.8	FDA		Respiratory system	DNA Damage/DNA Repair	DNA gyrase; Topoisomerase	DNA gyrase; Topo II; Topo IV	Levofloxacin is a broad-spectrum, third-generation fluoroquinolone antibiotic and optically active L-isomer of ofloxacin with antibacterial activity. Levofloxacin diffuses through the bacterial cell wall and acts by inhibiting DNA gyrase (bacterial topoisomerase II), an enzyme required for DNA replication, RNA transcription, and repair of bacterial DNA. Inhibition of DNA gyrase activity leads to …	Schmitz FJ, et al. J Antimicrob ChemOthers. 1998 Apr;41(4):481-4.
T8736	Cidofovir dihydrate	GS 0504; HPMPC; (S)-HPMPC	149394-66-1	O=P(O)(O)CO[C@H](CO)CN1C(N=C(C=C1)N)=O.O.O	C8H18N3O8P	315.22	FDA		Infection	Others	Others	CMV	Cidofovir is an anti-CMV drug, It can suppress CMV replication by selective inhibition of viral DNA polymerase and therefore prevention of viral replication and transcription. idofovir is an injectable antiviral medication primarily used as a treatment for cytomegalovirus (CMV) retinitis- an infection of the retina of the eye in people with AIDS	Snoeck R, et al, Antimicrob Agents Chemother, 1988, 32(12), 1839-1844.
T22246	Argatroban Monohydrate		141396-28-3	O.C[C@@H]1CCN([C@H](C1)C(O)=O)C(=O)[C@H](CCCNC(N)=N)NS(=O)(=O)c1cccc2CC(C)CNc12	C23H38N6O6S	526.65	FDA		Cardiovascular system	Proteases/Proteasome	Thrombin	Thrombin	Argatroban Monohydrate is a specific thrombin inhibitor, which is a non-heparin anticoagulant, prevents the formation of thrombi.	Berry CN, et al. Br J Pharmacol,1994, 113(4), 1209-1214.
T1792L	Regorafenib monohydrate		1019206-88-2	O.CNC(=O)c1cc(Oc2ccc(NC(=O)Nc3ccc(Cl)c(c3)C(F)(F)F)c(F)c2)ccn1	C21H17ClF4N4O4	500.83	FDA		Cancer	Angiogenesis; Tyrosine Kinase/Adaptors; Apoptosis; Autophagy; MAPK	Autophagy; c-Kit; c-RET; PDGFR; Raf; VEGFR	Autophagy; B-RAF; B-Raf (V600E); Kit; murine VEGFR2; murine VEGFR3; PDGFR; PDGFRβ; Raf; RAF-1; RET; VEGFR	Regorafenib Monohydrate is a novel oral multikinase inhibitor with IC50 values of 13, 4.2, 46, 22, 7, 1.5, 2.5, 28, 19 nM for VEGFR1, murine VEGFR2, murine VEGFR3, PDGFR-β, KIT, RET, RAF-1, B-RAF and B-RAF(V600E) respectively.	Wilhelm SM, et al. Regorafenib (BAY 73-4506): a new oral multikinase inhibitor of angiogenic, stromal and oncogenic receptor tyrosine kinases with potent preclinical antitumor activity. Int J Cancer, 2011, 129(1), 245-255.
T21463	Temozolomide Acid	TMZA	113942-30-6	Cn1nnc2c(ncn2c1=O)C(O)=O	C6H5N5O3	195.14	FDA		Cancer	Others	Others	Others	Temozolomide Acid is a metabolite of temozolomide (TMZ). Temozolomide processes anticancer activity in vitro. Temozolomide (TMZ) is an oral alkylating agent used to treat glioblastoma multiforme (GBM) and astrocytomas.	Lee S Y . Temozolomide resistance in glioblastoma multiforme[J]. Genes & Diseases, 2016, 3( 3):198-210.
T21454	Nicardipine	Nicardipine; Cardene; Antagonil; Dagan; Flusemide	55985-32-5	COC(=O)C1=C(C)NC(C)=C(C1c1cccc(c1)[N+]([O-])=O)C(=O)OCCN(C)Cc1ccccc1	C26H29N3O6	479.53	FDA		Cardiovascular system	Membrane transporter/Ion channel; Metabolism	Calcium Channel	calcium channel	Nicardipine hydrochloride, a calcium channel blockers belonging to the dihydropyridine class, is a drug used to treat angina and high blood pressure.	R Stamatiou, et al. The dihydropyridine calcium antagonist nicardipine reduces aortic smooth muscle cell viability, proliferation and migration. Cardiovascular Research, 2018 Apr,114(1):S43.
T13730	Hydroxocobalamin acetate		22465-48-1	CC([O-])=O.CC(CNC(=O)CCC1(C)C(CC(N)=O)C2[N-]([Co+3])\C1=C(C)/C1=N/C(=C\C3=N\C(=C(C)/C4=NC2(C)C(C)(CC(N)=O)C4CCC(N)=O)C(C)(CC(N)=O)C3CCC(N)=O)C(C)(C)C1CCC(N)=O)OP([O-])(=O)O[C@@H]1[C@@H](CO)O[C@@H]([C@@H]1O)n1cnc2cc(C)c(C)cc12	C64H91CoN13O16P	1388.39	FDA		Cardiovascular system	Others	Others	Others	Hydroxocobalamin acetate is an injectable naturally occurring form of vitamin B12 with a favorable adverse effect profile, used as a dietary supplement in the treatment of vitamin B12 deficiency including pernicious anemia.	Cheungpasitporn W, et al. High-dose hydroxocobalamin for vasoplegic syndrome causing false blood leak alarm. Clin Kidney J. 2017 Jun;10(3):357-362.
T13038	Sultamicillin		76497-13-7	[H][C@]12SC(C)(C)[C@@H](N1C(=O)[C@H]2NC(=O)[C@H](N)c1ccccc1)C(=O)OCOC(=O)[C@@H]1N2C(=O)C[C@@]2([H])S(=O)(=O)C1(C)C	C25H30N4O9S2	594.66	NMPA;PMDA		infection	Microbiology/virology	Antibacterial; Antibiotic	Antibiotic; Bacterial; β-Lactamase	Sultamicillin is an orally active double prodrug of Ampicillin/Sulbactan. Sulbactam is a semisynthetic β-Lactamase inhibitor.	Friedel HA, et al. Sultamicillin. A review of its antibacterial activity, pharmacokinetic properties and therapeutic use. Drugs. 1989 Apr;37(4):491-522.
T14853	Cabergoline	FCE-21336	81409-90-7	[H][C@@]12Cc3c[nH]c4cccc(c34)[C@@]1([H])C[C@H](CN2CC=C)C(=O)N(CCCN(C)C)C(=O)NCC	C26H37N5O2	451.60	FDA		Others	Autophagy; GPCR/G Protein; Neuroscience	5-HT Receptor; Autophagy; Dopamine Receptor	5-HT2B; Autophagy; D2; D3; Dopamine	Cabergoline is an ergot derived-dopamine D2-like receptor agonist. It has high affinity for D2, D3, and 5-HT2B receptors (Ki=0.7, 1.5, and 1.2, respectively).Cabergoline permits rapid and effective hormonal and tumor control by normalizing prolactin-producing pituitary adenomas levels.	Odaka H, et al. Cabergoline, dopamine D2 receptor agonist, prevents neuronal cell death under oxidative stress via reducing excitotoxicity. PLoS One. 2014 Jun 10;9(6):e99271.
T14291	Anisindione		117-37-3	COc1ccc(cc1)C1C(=O)c2ccccc2C1=O	C16H12O3	252.26	FDA		Cerebrovascular system	Others	Others	Others	Anisindione is a synthetic anticoagulant and an indanedione derivative. It prevents the formation of active procoagulation factors II, VII, IX, and X, as well as the anticoagulant proteins C and S, in the liver by inhibiting the vitamin K–mediated gamma-carboxylation of precursor proteins.	M, D, Freedman, et al. Clinically significant drug interactions with the oral anticoagulants.[J]. Drug safety, 2018.
T14128	Adenosylcobalamin	Coenzyme B12; Cobamamide; AdoCbl	13870-90-1	[CH2-]([Co+3]1234[N]=5[C@@]6(C)[C@@]7([N-]1C([C@@](C)([C@H]7CC(N)=O)CCC(=O)NC[C@@H](C)OP(=O)([O-])O[C@H]8C(O)([C@@H](N9C=[N]2C=%10C9=CC(C)=C(C)C%10)O[C@@H]8CO)[H])=C(C)C%11=[N]3C(=CC%12=[N]4C(=C(C)C5[C@@H](CCC(N)=O)[C@@]6(CC(N)=O)C)[C@](CC(N)=O)(C)[C@@H]%12CCC(N)=O)C(C)(C)[C@@H]%11CCC(N)=O)[H])[C@H]%13O[C@H]([C@H](O)[C@@H]%13O)N%14C=%15C(N=C%14)=C(N)N=CN%15	C72H99CoN18O17P	1578.57	NMPA;PMDA		Others	Metabolism	Endogenous Metabolite	Endogenous Metabolite; Human Endogenous Metabolite	Adenosylcobalamin is a biologically active form of vitamin B12 .It is a cofactor for methylmalonyl CoA mutase. It belongs to the corrinoid group of compounds, which contain a corrin macrocycle, and is produced only by certain bacteria and archaea. It is a cofactor for various enzymes including mutases, eliminases, aminomutases, and a reductase.	Kumudha A, et al. Characterization of vitamin B12 in Dunaliella salina. J Food Sci Technol. 2016 Jan;53(1):888-94.
T19850	Semaglutide		910463-68-2	CC[C@H](C)[C@H](NC(=O)[C@H](Cc1ccccc1)NC(=O)[C@H](CCC(O)=O)NC(=O)[C@H](CCCCNC(=O)COCCOCCNC(=O)COCCOCCNC(=O)CC[C@@H](NC(=O)CCCCCCCCCCCCCCCCC(O)=O)C(O)=O)NC(=O)[C@H](C)NC(=O)[C@H](C)NC(=O)[C@H](CCC(N)=O)NC(=O)CNC(=O)[C@H](CCC(O)=O)NC(=O)[C@H](CC(C)C)NC(=O)[C@H](Cc1ccc(O)cc1)NC(=O)[C@H](CO)NC(=O)[C@H](CO)NC(=O)[C@@H](NC(=O)[C@H](CC(O)=O)NC(=O)[C@H](CO)NC(=O)[C@@H](NC(=O)[C@H](Cc1ccccc1)NC(=O)[C@@H](…	C187H291N45O59	4114	FDA		Metabolism	GPCR/G Protein	Glucagon Receptor	GLP-1; Glucagon Receptor	Semaglutide is a glucagon-like peptide 1 receptor (GLP-1R) agonist(EC50 of 6.2 pM in a reporter assay using BHK cells expressing the human receptor).	Dhillon S, et al. Semaglutide: First Global Approval. Drugs. 2018 Feb;78(2):275-284.
T16807	Rucaparib monocamsylate	Rucaparib Camsylate	1859053-21-6	CC1(C)[C@@H]2CC[C@@]1(CS(O)(=O)=O)C(=O)C2.CNCc1ccc(cc1)-c1[nH]c2cc(F)cc3C(=O)NCCc1c23	C29H34FN3O5S	555.66	FDA		Reproductive system;cancer	Chromatin/Epigenetic; DNA Damage/DNA Repair	PARP	PARP; PARP1	Rucaparib Camsylate is a PARP inhibitor (PARP1,Ki of 1.4 nM). Rucaparib Camsylate also displays binding affinity to eight other PARP domains.	Thomas HD, et al. Preclinical selection of a novel poly(ADP-ribose) polymerase inhibitor for clinical trial. Mol Cancer Ther, 2007, 6(3), 945-956.
T15727	Sonidegib diphosphate	Erismodegib diphosphate; Sonidegib diphosphate; LDE225 diphosphate; NVP-LDE 225 diphosphate	1218778-77-8	OP(O)(O)=O.OP(O)(O)=O.C[C@H]1CN(C[C@@H](C)O1)c1ccc(NC(=O)c2cccc(-c3ccc(OC(F)(F)F)cc3)c2C)cn1	C26H32F3N3O11P2	681.49	EMA		Cancer	Stem Cells	Smo	hSmo; mSmo; Smo	Erismodegib diphosphate is an effective and selective Smo antagonist (IC50: 1.3 nM and 2.5 nM for mouse and human Smo in a binding assay, respectively).	Pan S, et al. Discovery of NVP-LDE225, a Potent and Selective Smoothened Antagonist. ACS Med Chem Lett. 2010 Mar 16;1(3):130-4.
T14865	Carboprost tromethamine		58551-69-2	NC(CO)(CO)CO.CCCCC[C@](C)(O)\C=C\[C@H]1[C@H](O)C[C@H](O)[C@@H]1C\C=C/CCCC(O)=O	C25H47NO8	489.64	FDA		Others	GPCR/G Protein; Immunology/Inflammation	Prostaglandin Receptor	prostaglandin F2α; Prostaglandin Receptor	Carboprost tromethamine is the synthetic 15-methyl analogue of prostaglandin F2α and it can effectively promote law contraction of the uterus and significantly reduce the amount of bleeding during and after delivery.	Ling Z, et al. Effect of carboprost tromethamine in prevention of postpartum hemorrhage in cesarean section. Pak J Pharm Sci. 2018 Sep;31(5(Special)):2257-2262.
T12441	Phenelzine sulfate		156-51-4	OS(O)(=O)=O.NNCCc1ccccc1	C8H14N2O4S	234.27	FDA		nervous system	Neuroscience	monoamine oxidase	monoamine oxidase	Phenelzine sulfate is a non-selective and irreversible inhibitor of monoamine oxidase (MAOI), and with antidepressant and anxiolytic.	A G B , A D M , A M K , et al. Attenuation of the effects of oxidative stress by the MAO-inhibiting antidepressant and carbonyl scavenger phenelzine[J]. Chemico-Biological Interactions, 2019, 304:139-147.
T8734	Choline		123-41-1	[OH-].C[N+](C)(C)CCO	C5H15NO2	121.18	PMDA;NMPA		Others	Others	Others	Others	Choline is a ubiquitous water soluble nutrient, often associated with the B vitamins	Hollenbeck C B . An Introduction to the Nutrition and Metabolism of Choline[J]. Central Nervous System Agents in Medicinal Chemistry, 2012, 12(2):-.
T14932	Ceruletide	Caerulein; Cerulein; FI-6934	17650-98-5	C([C@@H](C(N[C@H](C(N[C@H](C(N[C@@H](CC1=CC=CC=C1)C(N)=O)=O)CC(O)=O)=O)CCSC)=O)NC(CNC([C@@H](NC([C@H](CC2=CC=C(OS(=O)(=O)O)C=C2)NC([C@@H](NC([C@@H](NC(=O)[C@H]3NC(=O)CC3)CCC(N)=O)=O)CC(O)=O)=O)=O)[C@@H](C)O)=O)=O)C=4C=5C(NC4)=CC=CC5	C58H73N13O21S2	1352.41	FDA		Others	GPCR/G Protein	cholecystokinin	Cholecystokinin	Ceruletide is a potent agonist of cholecystokinin receptor and it also is a safe and effective cholecystokinetic agent. It has a direct spasmogenic effect on the gallbladder muscle and bile ducts.	Vincent ME, et al. Pharmacology, clinical uses, and adverse effects of ceruletide, a cholecystokinetic agent. Pharmacotherapy. 1982 Jul-Aug;2(4):223-34.
T12408	Perhexiline maleate		6724-53-4	OC(=O)\C=C/C(O)=O.C(C(C1CCCCC1)C1CCCCC1)C1CCCCN1	C23H39NO4	393.56	NMPA		Cardiovascular system	Metabolism	Mitochondrial Metabolism	CPT 1; Mitochondrial Metabolism	Perhexiline maleate is a potent inhibitor of carnitine palmitoyltransferase 1 (CPT 1) (rat heart and liver CPT 1 with IC50s of 77 and 148 μM , respectively).	Kennedy JA, et al. Inhibition of carnitine palmitoyltransferase-1 in rat heart and liver by Perhexiline and amiodarone. Biochem Pharmacol. 1996 Jul 26;52(2):273-80.
T20884	Hydroxyzine	Hydroxyzine free base	68-88-2	OCCOCCN1CCN(CC1)C(c1ccccc1)c1ccc(Cl)cc1	C21H27ClN2O2	374.9	PMDA		Immune system; Inflammation; nervous system	GPCR/G Protein; Immunology/Inflammation; Neuroscience	Histamine Receptor	H1 receptor; Histamine Receptor	Hydroxyzine is an antagonist of histamine H1-receptor.	Mcintyre I M , Mallett P , Trochta A , et al. Hydroxyzine distribution in postmortem cases and potential for redistribution[J]. Forensic ence International, 2013, 231(1-3):28-33.
T8708	Paroxetine		61869-08-7	Fc1ccc(cc1)[C@@H]1CCNC[C@H]1COc1ccc2OCOc2c1	C19H20FNO3	329.37	FDA		nervous system	Neuroscience	Serotonin Transporter	serotonin	Paroxetine is a inhibitor of serotonin uptake that is effective in the treatment of depression.	Cipriani A , Furukawa T A , Veronese A , et al. Paroxetine versus other anti-depressive agents for depression[J]. Cochrane Database of Systematic Reviews, 2007.
T21337	Lurasidone	SM-13496	367514-87-2	[H][C@@]12[C@H]3CC[C@H](C3)[C@]1([H])C(=O)N(C[C@@H]1CCCC[C@H]1CN1CCN(CC1)c1nsc3ccccc13)C2=O	C28H36N4O2S	492.68	FDA		nervous system	GPCR/G Protein; Neuroscience	5-HT Receptor; Dopamine Receptor	5-HT Receptor; 5-HT1A; 5-HT7; D2; Dopamine	Lurasidone is an antagonist of both dopamine D2 and 5-HT7(IC50=1.68 and 0.495 nM, respectively).It also a partial agonist of 5-HT1A receptor(IC50 : 6.75 nM).	Greenberg W M , Citrome L . Pharmacokinetics and Pharmacodynamics of Lurasidone Hydrochloride, a Second-Generation Antipsychotic: A Systematic Review of the Published Literature[J]. Clinical Pharmacokinetics, 2016.
T19862	Voxilaprevir		1535212-07-7	[H][C@]12CN([C@@H]([C@@H]1CC)C(=O)N[C@@]1(C[C@H]1C(F)F)C(=O)NS(=O)(=O)C1(C)CC1)C(=O)[C@@H](NC(=O)O[C@@H]1C[C@H]1CCCCC(F)(F)c1nc3ccc(OC)cc3nc1O2)C(C)(C)C	C40H52F4N6O9S	868.94	FDA		infection;Immune system	Microbiology/virology; Proteases/Proteasome	HCV Protease	HCV	Voxilaprevir is an inhibitor of hepatitis C virus (HCV) nonstructural (NS) protein 3/4A protease.	Bourlière, Marc, Gordon S C , Flamm S L , et al. Sofosbuvir, Velpatasvir, and Voxilaprevir for Previously Treated HCV Infection.[J]. N Engl J Med, 2017, 376(22):2134-2146.
T22453	Venlafaxine	Wy 45030	93413-69-5	COc1ccc(cc1)C(CN(C)C)C1(O)CCCCC1	C17H27NO2	277.4	NMPA;PMDA		nervous system	Neuroscience	Serotonin Transporter	Serotonin Transporter; serotonin-norepinephrine reuptake	Venlafaxine, an arylalkanolamine serotonin-norepinephrine reuptake inhibitor (SNRI), is used to treat major generalised anxiety disorder (GAD), depressive disorder (MDD), panic disorder and social phobia.	Singh J . Venlafaxine: more dangerous than most "selective" serotonergic antidepressants.[J]. prescrire international, 2016, 25(170):96.
T17199	Udenafil	DA8159	268203-93-6	CCCOc1ccc(cc1-c1nc2c(CCC)nn(C)c2c(=O)[nH]1)S(=O)(=O)NCCC1CCCN1C	C25H36N6O4S	516.66	South Korea		Cardiovascular system;Reproductive system	Metabolism	PDE	PDE5; phosphodiesterase	Udenafil is an inhibitor of PDE5 .	Zhao, C., et al., Activity of phosphodiesterase type 5 inhibitors in patients with lower urinary tract symptoms due to benign prostatic hyperplasia. BJU Int, 2011. 107(12): p. 1943-7.
T17035	Temoporfin	m-THPC; KW2345	122341-38-2	Oc1cccc(c1)-c1c2CCc(n2)c(-c2cccc(O)c2)c2ccc([nH]2)c(-c2cccc(O)c2)c2ccc(n2)c(-c2cccc(O)c2)c2ccc1[nH]2	C44H32N4O4	680.75	EMA		Cancer	Others	Others	Others	Temoporfin used in photodynamic therapy for the treatment of squamous cell carcinoma of the head and neck.	http://en.wikipedia.org/wiki/Temoporfin
T11897	Telotristat ethyl	LX1606	1033805-22-9	CCOC(=O)[C@@H](N)Cc1ccc(cc1)-c1cc(O[C@H](c2ccc(Cl)cc2-n2ccc(C)n2)C(F)(F)F)nc(N)n1	C27H26ClF3N6O3	574.98	EMA		Cancer	Metabolism	Hydroxylase	tryptophan hydroxylase	Telotristat ethyl is a orally-delivered inhibitor of tryptophan hydroxylase that reduces serotonin production.	Tamas Oravecz, et al. LX1606 (aka LX1032), a Novel Inhibitor of Serotonin Synthesis, Alleviates Development of Inflammatory Bowel Disease in a Preclinical Model.
T15707	Laninamivir	R 125489	203120-17-6	[H][C@]1(OC(=C[C@H](NC(N)=N)[C@H]1NC(C)=O)C(O)=O)[C@H](OC)[C@H](O)CO	C13H22N4O7	346.34	PMDA		Infection	Microbiology/virology	Influenza Virus	Influenza Virus; influenza neuraminidase (NA)	Laninamivir is an effective inhibitor of influenza neuraminidase (NA) (IC50s: 0.90 nM, 1.83 nM, and 3.12 nM for avian H12N5 NA (N5), pH1N1 N1 NA (p09N1) and A/RI/5+/1957 H2N2 N2 (p57N2), respectively).	Vavricka CJ, et al. Structural and functional analysis of laninamivir and its octanoate prodrug reveals group specific mechanisms for influenza NA inhibition. PLoS Pathog. 2011 Oct;7(10):e1002249.
T14495	Baloxavir	Baloxavir acid; S-033447	1985605-59-1	[H][C@@]12COCCN1C(=O)c1c(O)c(=O)ccn1N2[C@@H]1c2ccccc2SCc2c(F)c(F)ccc12	C24H19F2N3O4S	483.49	PMDA		infection	Microbiology/virology	Influenza Virus	Influenza virus	Baloxavir is a first-in-class cap-dependent endonuclease inhibitor of the influenza virus polymerase PA subunit.	Omoto S, et al. Characterization of influenza virus variants induced by treatment with the endonuclease inhibitor baloxavir marboxil. Sci Rep. 2018 Jun 25;8(1):9633.
T8709	Nandrolone phenylpropionate	Nandrolone phenpropionate	62-90-8	CC12CCC3C(C1CCC2OC(=O)CCC4=CC=CC=C4)CCC5=CC(=O)CCC35	C27H34O3	406.6	NMPA		Cardiovascular system;Cancer	Endocrinology/Hormones	Androgen Receptor	androgen receptor	Nandrolone phenpropionate is an androgen receptor agonist. It mainly used to treat women with breast cancer and osteoporosis	Kahn S B , Conroy J F , Brodsky I . Effect of nandrolone phenpropionate on myelopoiesis[J]. Journal of Medicine, 1974, 5(6):303.
T8696	Propranolol HCl	dl-propranolol hcl	3506-09-0	Cl.CC(C)NCC(O)COc1cccc2ccccc12	C16H22ClNO2	295.8	PMDA;EMA;NMPA		Cardiovascular system;nervous system	GPCR/G Protein; Neuroscience	Adrenergic Receptor	β1-adrenergic receptor; β2-adrenergic receptor	Propranolol hydrochloride is a blocker of β1 and β2 adrenergic receptor	Abdulrahman A Al-Majed, Ahmed H H Bakheit. Profiles Drug Subst Excip Relat Methodol. 2017;42:287-338.Propranolol.
T8689	CHLOROQUINE		54-05-7	CCN(CC)CCCC(C)Nc1ccnc2cc(Cl)ccc12	C18H26ClN3	319.87	NMPA		infection	Autophagy; Immunology/Inflammation; Microbiology/virology; Proteases/Proteasome	Antibiotic; Autophagy; HIV Protease; Parasite; SARS-CoV; TLR	Antibiotic; autophagy; HIV; HIV-1; Parasite; SARS-CoV; SARS-COV-2; TLR	Chloroquine is an autophagy and toll-like receptors (TLRs) inhibitor. Chloroquine is an antimalarial and anti-inflammatory agent widely used to treat malaria and rheumatoid arthritis. Chloroquine is highly effective in the control of SARS-CoV-2 (COVID-19) infection in vitro with EC50 of 1.13 μM.	Tuomela J, et al. Chloroquine has tumor-inhibitory and tumor-promoting effects in triple-negative breast cancer. Oncol Lett. 2013 Dec;6(6):1665-1672.
T8666	Naratriptan		121679-13-8	CNS(=O)(=O)CCc1ccc2[nH]cc(C3CCN(C)CC3)c2c1	C17H23N3O2S	333.45	PMDA		Nervous system	GPCR/G Protein; Neuroscience	5-HT Receptor	5-HT Receptor; 5-HT1	Naratriptan is a selective agonist of 5-HT1 receptor and is is used for the treatment of migraine headaches.	Ito Y , Mitsufuji T , Asano Y , et al. Naratriptan in the Prophylactic Treatment of Cluster Headache[J]. Intern Med, 2017, 56(19).
T8654	Plx-4032	Vemurafenib	1029872-54-5	CCCS(=O)(=O)Nc1ccc(F)c(C(=O)c2c[nH]c3ncc(cc23)-c2ccc(Cl)cc2)c1F	C23H18ClF2N3O3S	489.92	EMA;PMDA;NMPA		Cancer	MAPK	Raf	B-Raf	PLX-4032 is a small-molecule B-Raf inhibitor for the potential treatment of malignant melanoma.	Smalley K S M . PLX-4032, a small-molecule B-Raf inhibitor for the potential treatment of malignant melanoma.[J]. Current Opinion in Investigational Drugs, 2010, 11(6):699-706.
T8651	CAL-101	GS-1101	1146702-54-6	O=C1N(C2=CC=CC=C2)C([C@@H](NC3=C4N=CNC4=NC=N3)C)=NC5=C1C(F)=CC=C5	C22H18FN7O	415.42	EMA		Cancer	PI3K/Akt/mTOR signaling	PI3K	p110δ	Idelalisib is a selective inhibitor of p110δ(IC50 : 2.5 nM; in cell-free assays); shown to have 40- to 300-fold greater selectivity for p110δ than p110α/β/γ, and 400- to 4000-fold more selectivity to p110δ than C2β, hVPS34, DNA-PK and mTOR.	Brian J Lannutti, Sarah A Meadows, Sarah E M Herman,et al.CAL-101, a p110delta selective phosphatidylinositol-3-kinase inhibitor for the treatment of B-cell malignancies, inhibits PI3K signaling and cellular viability.Blood. 2011 Jan 13;117(2):591-4.
T5036	cangrelor tetrasodium		163706-36-3	[Na+].[Na+].[Na+].[Na+].CSCCNc1nc(SCCC(F)(F)F)nc2n(cnc12)[C@@H]1O[C@H](COP([O-])(=O)OP([O-])(=O)C(Cl)(Cl)P([O-])([O-])=O)[C@@H](O)[C@H]1O	C17H21Cl2F3N5Na4O12P3S2	864.29	EMA		Cardiovascular system	Endocrinology/Hormones; GPCR/G Protein; Neuroscience	GPR; P2 Receptor	GPR17; P2Y	Cangrelor tetrasodium is a reversible and selective antagonist of platelet P2Y12, with prompt and potent antiplatelet effects.	Tianwei Zhan, Taofeng Wei.Cangrelor alleviates bleomycin-induced pulmonary fibrosis by inhibiting platelet activation in mice.Mol Immunol. 2020 Apr;120:83-92.
T23133	Pentamidine		100-33-4	NC(=N)c1ccc(OCCCCCOc2ccc(cc2)C(N)=N)cc1	C19H24N4O2	340.42	PMDA		Respiratory system;infection	Metabolism; Microbiology/virology	Antibacterial; Antibiotic; Antifungal; Parasite; Phosphatase	Antibiotic; antifungal; Bacterial; Fungal; Parasite; Phosphatase	Pentamidine is an antifungal and antiprotozoal agent, interacting directly with the pathogen genome by binding to AT-rich regions of duplex DNA and the minor groove of DNA, thereby interfering with DNA replication.	Michael S , Kron M A , Brown R B . Pentamidine: A Review[J]. Reviews of Infectious Diseases(5):625.
T2147	Nilotinib monohydrochloride monohydrate	Nilotinib (monohydrochloride monohydrate); AMN107 (monohydrochloride monohydrate)	923288-90-8	O.Cl.Cc1cn(cn1)-c1cc(NC(=O)c2ccc(C)c(Nc3nccc(n3)-c3cccnc3)c2)cc(c1)C(F)(F)F	C28H22F3N7O.HCl.H2O	583.99	EMA;PMDA;NMPA		Cancer	Angiogenesis; Cytoskeletal Signaling; Tyrosine Kinase/Adaptors; Autophagy	Autophagy; Bcr-Abl	Autophagy; Bcr-Abl	Nilotinib monohydrochloride monohydrate is significantly potent BCR-ABL against, is a second generation tyrosine kinase inhibitor (TKI), and is active against many BCR-ABL mutants.	Sako H , Fukuda K , Saikawa Y , et al. Antitumor Effect of the Tyrosine Kinase Inhibitor Nilotinib on Gastrointestinal Stromal Tumor (GIST) and Imatinib-Resistant GIST Cells[J]. PLOS ONE, 2014, 9(9):e107613.
T21066	Norepinephrine bitartrate salt		3414-63-9	C[C@H]([C@@H](O)C(O)=O)C(O)=O.NCC(O)c1ccc(O)c(O)c1	C12H17NO9	319.27	PMDA;NMPA		Cardiovascular system;nervous system	GPCR/G Protein; Neuroscience	Adrenergic Receptor	Adrenergic Receptor	Norepinephrine bitartrate salt is an adrenergic neurotransmitter.	Haiying Shen, Feng Qu, Yong Xia, et al.Straightforward and Ultrastable Surface Modification of Microfluidic Chips with Norepinephrine Bitartrate Improves Performance in Immunoassays. Anal Chem. 2018 Mar 20;90(6):3697-3702.
TP1796	Albiglutide TFA (782500-75-8 free base)		TP1796	OC(=O)C(F)(F)F.CC[C@H](C)[C@H](NC(=O)[C@H](CC1=CC=CC=C1)NC(=O)[C@H](CCC(O)=O)NC(=O)[C@H](CCCCN)NC(=O)[C@H](C)NC(=O)[C@H](C)NC(=O)[C@H](CCC(N)=O)NC(=O)CNC(=O)[C@H](CCC(O)=O)NC(=O)[C@H](CC(C)C)NC(=O)[C@H](CC1=CC=C(O)C=C1)NC(=O)[C@H](CO)NC(=O)[C@H](CO)NC(=O)[C@@H](NC(=O)[C@H](CC(O)=O)NC(=O)[C@H](CO)NC(=O)[C@@H](NC(=O)[C@H](CC1=CC=CC=C1)NC(=O)[C@@H](NC(=O)CNC(=O)[C@H](CCC(O)=O)NC(=O)CNC(=O)[C@@H](N)C…	C150H225F3N40O47	3397.63	FDA		Metabolism	GPCR/G Protein	Glucagon Receptor	GLP-1	Albiglutide TFA is a long acting GLP-1 receptor agonist for the treatment of type 2 diabetes mellitus (T2DM).	Matthews JE, et al. Pharmacodynamics, pharmacokinetics, safety, and tolerability of albiglutide, a long-acting glucagon-like peptide-1 mimetic, in patients with type 2 diabetes. J Clin Endocrinol Metab. 2008 Dec;93(12):4810-7.
TP1469	Lixisenatide acetate (320367-13-3 free base)		1997361-87-1	CC[C@H](C)[C@H](NC(=O)[C@H](CC1=CC=CC=C1)NC(=O)[C@H](CC(C)C)NC(=O)[C@H](CCCNC(N)=N)NC(=O)[C@@H](NC(=O)[C@H](C)NC(=O)[C@H](CCC(O)=O)NC(=O)[C@H](CCC(O)=O)NC(=O)[C@H](CCC(O)=O)NC(=O)[C@H](CCSC)NC(=O)[C@H](CCC(N)=O)NC(=O)[C@H](CCCCN)NC(=O)[C@H](CO)NC(=O)[C@H](CC(C)C)NC(=O)[C@H](CC(O)=O)NC(=O)[C@H](CO)NC(=O)[C@@H](NC(=O)[C@H](CC1=CC=CC=C1)NC(=O)[C@@H](NC(=O)CNC(=O)[C@H](CCC(O)=O)NC(=O)CNC(=O)[C@@H](N)…	C215H347N61O65S.6C2H4O2	5218.79	EMA;PMDA;NMPA		Endocrine system	GPCR/G Protein	Glucagon Receptor	GLP-1; Glucagon Receptor	Lixisenatide acetate is a receptor agonist similar to glucagon-like peptide-1 (glp-1) for the treatment of type 2 diabetes mellitus (T2DM).	Ahrén B et al. Postprandial Glucagon Reductions Correlate to Reductions in Postprandial Glucose and Glycated Hemoglobin with Lixisenatide Treatment in Type 2 Diabetes Mellitus: A Post Hoc Analysis. Diabetes Ther. 2016 Jun 18.
T22459	Xanthinol Nicotinate	Complamin; Angioamin	437-74-1	OC(=O)c1cccnc1.CN(CCO)CC(O)Cn1cnc2n(C)c(=O)n(C)c(=O)c12	C13H21N5O4.C6H5NO2	434.45	NMPA		Others	Others	Others	Others	Xanthinol Nicotinate is a potent vasodilator that can easily enter the cell and causes an increase in glucose metabolism resulting in an increased energy.	Davis E , Rozov H . Xanthinol nicotinate in peripheral vascular disease[J]. Practitioner, 1975, 215(1290):793-798.
T8641	Vancomycin		1404-90-6	CN[C@H](CC(C)C)C(=O)N[C@@H]1[C@H](O)c2ccc(Oc3cc4cc(Oc5ccc(cc5Cl)[C@@H](O)[C@@H]5NC(=O)[C@H](NC(=O)[C@@H]4NC(=O)[C@H](CC(N)=O)NC1=O)c1ccc(O)c(c1)-c1c(O)cc(O)cc1[C@H](NC5=O)C(O)=O)c3O[C@@H]1O[C@H](CO)[C@@H](O)[C@H](O)[C@H]1O[C@H]1C[C@](C)(N)[C@H](O)[C@H](C)O1)c(Cl)c2	C66H75Cl2N9O24	1449.25	PMDA;NMPA		infection	Autophagy; Microbiology/virology	Antibacterial; Antibiotic; Autophagy	antibiotic; Autophagy; Bacterial	Vancomycin is an antibiotic used to treat serious bacterial infections by stopping the growth of bacteria.	Reardon J , Lau T T Y , Ensom M H H . Vancomycin loading doses: a systematic review.[J]. The Annals of pharmacotherapy, 2015, 49(5):557.
T22314	Doripenem		148016-81-3	[H][C@]12[C@@H](C)C(S[C@@H]3CN[C@H](CNS(N)(=O)=O)C3)=C(N1C(=O)[C@]2([H])[C@@H](C)O)C(O)=O	C15H24N4O6S2	420.5	PMDA,EMA		infection;Inflammation	Microbiology/virology	Antibacterial; Antibiotic	antibiotic; Bacterial	Doripenem is a new parenteral carbapenem antibiotic with broad-spectrum activity against gram-negative and gram-positive pathogens.	Wagenlehner, Florian, M, et al. Ceftazidime-avibactam Versus Doripenem for the Treatment of Complicated Urinary Tract Infections, Including Acute Pyelonephritis: RECAPTURE, a Phase 3 Randomized Trial Program[J]. Clinical Infectious Diseases, 2016.
T15261	Evocalcet	KHK7580	870964-67-3	C[C@@H](N[C@H]1CCN(C1)c1ccc(CC(O)=O)cc1)c1cccc2ccccc12	C24H26N2O2	374.48	PMDA		Others	GPCR/G Protein	CaSR	CaSR	Evocalcet has an activating effect on the calcium-sensing receptor (CaSR).	Tanimura, Shinji, et al. Pharmaceutical composition containing aryl alkyl amine compound. WO 2017061621 A1.
T14856	Calcipotriol	MC 903; Calcipotriene	112965-21-6	[H][C@@]1(CC[C@]2([H])[C@]1(C)CCC\C2=C/C=C1/C[C@@H](O)C[C@H](O)C1=C)[C@H](C)\C=C\[C@@H](O)C1CC1	C27H40O3	412.6	PMDA;NMPA		Inflammation	Metabolism	Vitamin	VD/VDR; Vitamin D receptor	Calcipotriol is a synthetic VitD3 analogue. Which has a high affinity for the vitamin D receptor.	Sakabe JI, et al. Calcipotriol Increases hCAP18 mRNA Expression but Inhibits Extracellular LL37 Peptide Production in IL-17/IL-22-stimulated Normal Human Epidermal Keratinocytes. Acta Derm Venereol. 2014 Sep;94(5):512-6.
T12643	(R)-Terazosin		109351-34-0	COc1cc2nc(nc(N)c2cc1OC)N1CCN(CC1)C(=O)[C@H]1CCCO1	C19H25N5O4	387.43	PMDA,NMPA		Cardiovascular system	GPCR/G Protein; Neuroscience	Adrenergic Receptor	Adrenergic Receptor; α1A-adrenergic receptor; α1B-adrenergic receptor; α1d-adrenoceptor	(R)-Terazosin is an active R-enantiomer of Terazosin. (R)-Terazosin is a potent antagonist of α1-adrenoceptor (α1a, α1b and α1d-adrenoceptor with Ki values of 6.51 nM, 1.01 nM and 1.97 nM, respectively).	Hancock AA, et al. Actions of terazosin and its enantiomers at subtypes of alpha 1- and alpha 2-adrenoceptors in vitro. J Recept Signal Transduct Res. 1995 Sep-Dec;15(7-8):863-85.
T19288	DL-Arginine		7200-25-1	NC(CCCNC(N)=N)C(O)=O	C6H14N4O2	174.2	NMPA,EMA		Others	Others	Others	Others	DL-Arginine is used in analysis of amino acid complexation dynamics and crystal structure formations.	NA
T19418	Methionine sulfoxide		62697-73-8	CS(=O)CCC(N)C(O)=O	C5H11NO3S	165.21	NMPA		Digestive system	Metabolism	Endogenous Metabolite	Endogenous Metabolite; Human Endogenous Metabolite	Methionine sulfoxide can be regarded as a biomarker of oxidative stress in vivo. Methionine sulfoxide is an oxidation product of methionine with reactive oxygen species.	Mashima R, et al. Simultaneous determination of methionine sulfoxide and methionine in blood plasma using gas chromatography-mass spectrometry. Anal Biochem. 2003 Feb 1;313(1):28-33.
T15219	Enarodustat	JTZ-951	1262132-81-9	OC(=O)CNC(=O)c1c(O)cc(CCc2ccccc2)n2ncnc12	C17H16N4O4	340.33	PMDA		Others	Chromatin/Epigenetic; Metabolism	HIF/HIF Prolyl-Hydroxylase	HIF/HIF Prolyl-Hydroxylase; prolyl hydroxylase	Enarodustat is an orally active factor inhibitor of prolyl hydroxylase (EC50: 0.22 μM) and has the potential for renal anemia treatment.	Ogoshi Y, et al. Discovery of JTZ-951: A HIF Prolyl Hydroxylase Inhibitor for the Treatment of Renal Anemia. ACS Med Chem Lett. 2017 Nov 20;8(12):1320-1325.
T12317	Orelabrutinib	ICP-022	1655504-04-3	NC(=O)c1ccc(nc1-c1ccc(Oc2ccccc2)cc1)C1CCN(CC1)C(=O)C=C	C26H25N3O3	427.5	NMPA		Cancer	Angiogenesis; Tyrosine Kinase/Adaptors	BTK	BTK	Orelabrutinib is an orally active and irreversible inhibitor of Bruton's tyrosine kinase (BTK).	Wei Xu, et al. Safety, Tolerability and Efficacy of Orelabrutinib, Once a Day, to Treat Chinese Patients with Relapsed or Refractory Chronic Lymphocytic Leukemia/Small Cell Leukemia. Blood (2019) 134 (Supplement_1): 4319.
T8684	Sotorasib	AMG-510; sotorasib	2296729-00-3	CC(C)c1nccc(C)c1-n1c2nc(c(F)cc2c(nc1=O)N1CCN(C[C@@H]1C)C(=O)C=C)-c1c(O)cccc1F	C30H30F2N6O3	560.59	FDA		Cancer	GPCR/G Protein; MAPK	Ras	KRAS G12C; Ras	AMG-510 is a selective and orally bioavailable KRAS G12C covalent inhibitor.	Karen Rex, et al. Abstract 3090: In vivo characterization of AMG 510 - a potent and selective KRASG12Ccovalent small molecule inhibitor in preclinical KRASG12Ccancer models. Experimental and Molecular Therapeutics.
T8131	Lithium carbonate		554-13-2	O=C([O-])[O-].[Li+].[Li+]	CLi2O3	73.9	FDA		Nervous system	Others	Others	Others	Lithium carbonate is an effective drug against bipolar disorders.	Geeva, Shoba N . Lithium entrapped chitosan nanoparticles to reduce toxicity and increase cellular uptake of lithium[J]. Environmental Toxicology & Pharmacology, 2018, 61:79-86.
T13072	Taltirelin acetate	TA-0910 acetate	1549593-23-8	O=C(N(CCC1)[C@@H]1C(N)=O)[C@@H](NC([C@@H](NC2=O)CC(N2C)=O)=O)CC3=CN=CN3.CC(O)=O	C19H27N7O7	465.46	PMDA		Nervous system	Endocrinology/Hormones	Thyroid hormone receptor(THR)	THR	Taltirelin acetate is a superagonist at thyrotropin-releasing hormone receptor (TRH-R)(IC50 of 910 nM and EC50 of 36 nM for stimulating an increase in cytosolic Ca2+ concentration (Ca2+ release)).	Thirunarayanan N, et al. Taltirelin is a superagonist at the human thyrotropin-releasing hormone receptor. Front Endocrinol (Lausanne). 2012 Oct 9;3:120.
TP1097	Melanotan I	MT-I; [Nle4,D-Phe7]-α-MSH; Afamelanotide	75921-69-6	OC[C@H](NC(=O)[C@H](Cc1ccc(O)cc1)NC(=O)[C@H](CO)NC(C)=O)C(=O)N[C@@H](CCCC)C(=O)N[C@@H](CCC(=O)O)C(=O)N[C@@H](Cc2cncn2)C(=O)N[C@H](Cc3ccccc3)C(=O)N[C@@H](CCCNC(=N)N)C(=O)N[C@@H](Cc5cnc4ccccc45)C(=O)NCC(=O)N[C@@H](CCCCN)C(=O)N6CCC[C@H]6C(=O)N[C@H](C(N)=O)C(C)C	C78H111N21O19	1646.85	FDA		Others	Others	Others	Others	Melanotan-I has the amino acid sequence of Ser-Tyr-Ser-Nle-Glu-His-D-Phe-Arg-Trp-Gly-Lys-Pro-Val and a molecular weight of 1647.4 Dalton.	Langan EA, et al. Melanotropic peptides: more than just 'Barbie drugs' and 'sun-tan jabs'? Br J Dermatol. 2010 Sep;163(3):451-5.
T8634	8-Bromotheophylline	Bromotheophylline; 8-BROMOTHEOPHYLLINE	10381-75-6	Cn2c(=O)n(C)c1nc([Br])nc1c2=O	C7H7BrN4O2	259.06	Canada		Others	Others	Others	Others	Bromotheophylline is the active moiety of pamabrom, a mixture of 2-amino-2-methyl-propanol and bromotheophylline. From this mixture, bromotheophylline acts as a weak diuretic that has been used along with some analgesics to relieve the symptoms of premenstrual syndrome	Samura B A . [Effect of imidazo(1,2-f)xanthine derivatives on cerebral cortical bioelectrical activity and evoked potentials][J]. Farmakologiia i toksikologiia, 1983, 46(1):17-20.
T8631	pyridostigmine	Pyridostigminum; Regonol; Mestinon-SR; UNII-19QM69HH21; PyridostigmineBromine	155-97-5	C[N+]1=CC=CC(=C1)OC(=O)N(C)C	C9H13BrN2O2	261.12	FDA		Nervous system;Immune system	Others	Others	acetylcholinesterase	Pyridostigmine is an acetylcholinesterase inhibitor that can treat myasthenia gravis by increasing acetylcholine at the postsynaptic motor endplate.	Ahuja N K , Mische L , Clarke J O , et al. Pyridostigmine for the treatment of gastrointestinal symptoms in systemic sclerosis[J]. Semin Arthritis Rheum, 2018:S0049017217305498.
T8630	Baclofen hydrochloride	4-amino-3-(4-chlorophenyl)butanoic acid hydron chloride	28311-31-1	NC[C@]([H])(CC(=O)O)c1ccc([Cl])cc1.[Cl]	C10H13Cl2NO2	250.12	FDA		Nervous system	Membrane transporter/Ion channel; Neuroscience	GABA Receptor	GABA	Baclofen hydrochloride is a GAMMA-AMINOBUTYRIC ACID derivative that is a specific GABA-B RECEPTORS agonist. It is used in the treatment of MUSCLE SPASTICITY, especially that due to SPINAL CORD INJURIES. Its therapeutic effects result from actions at spinal and supraspinal sites, generally the reduction of excitatory transmission.	Wendell, Lake, Hamid, et al. Intrathecal Baclofen Infusion for the Treatment of Movement Disorders.[J]. Neurosurgery Clinics of North America, 2019.
T8599	Betazole dihydrochloride	Betazole hydrochloride	138-92-1	Cl.Cl.c1(CCN)cc[nH]n1	C5H11Cl2N3	184.07	FDA		Others	GPCR/G Protein; Immunology/Inflammation; Neuroscience	Histamine Receptor	H2 receptor; Histamine Receptor	Betazole hydrochloride is an agonist of H2 receptor.	Spitz I M , Novis B H , Ebert R , et al. Betazole-induced GIP secretion is not mediated by gastric HCl[J]. Metabolism-clinical & Experimental, 1982, 31(4):380-382.
T8581	Flecainide hydrochloride		57415-44-8	[F]C([F])([F])COc1ccc(OCC([F])([F])[F])c(c1)C(=O)NC[C@@]2([H])CCCCN2.[Cl]	C17H21ClF6N2O3	450.8	FDA		Cardiovascular system	Others	Others	Others	Flecainide is a medication used to prevent and treat abnormally fast heart rates. This includes ventricular and supraventricular tachycardias.	Markey, Gerard, C, et al. INTRAVENOUS FLECAINIDE FOR EMERGENCY DEPARTMENT MANAGEMENT OF ACUTE ATRIAL FIBRILLATION[J]. Journal of Emergency Medicine, 2018.
T8620	piperacillin	Pipracil; Pipercillin; Pipril; Pipracil	61477-96-1	CCN4CCN(C(=O)N[C@@]([H])(C(=O)N[C@]1([H])C(=O)N2[C@]1([H])[S]C(C)(C)[C@]2([H])C(=O)O)c3ccccc3)C(=O)C4=O	C23H27N5O7S	517.56	FDA		infection	Microbiology/virology	Antibacterial	bacterial	Piperacillin is a semisynthetic penicillin with wide spectrum of antimicrobial activity(particularly pseudomonas strains)	Messori A , Tulli G , Caccese E , et al. Piperacillin-Tazobactam: Extended Infusion Versus Continuous Infusion[J]. Critical care medicine, 2018, 46(7):e725.
T19644	Benzonatate		104-31-4	CCCCNc1ccc(cc1)C(=O)OCCOCCOCCOCCOCCOCCOCCOCCOCCOC	C30H53NO11	603.75	FDA		Respiratory system	Membrane transporter/Ion channel	Sodium Channel	sodium channel	Benzonatate is an antagonist of sodium channel protein.	Evans M S , Maglinger G B , Fletcher A M , et al. Benzonatate inhibition of voltage-gated sodium currents[J]. Neuropharmacology, 2016, 101:179.
TQ0203	Tafluprost	AFP-168; MK2452	209860-87-7	CC(C)OC(=O)CCC\C=C/C[C@H]1[C@@H](O)C[C@@H](O)[C@@H]1\C=C\C(F)(F)COc1ccccc1	C25H34F2O5	452.53	FDA		Others	GPCR/G Protein; Immunology/Inflammation	Prostaglandin Receptor	PGF2α	Tafluprost, a prostaglandin analog, is the selective agonist of fluoroprostaglandin (FP) receptor PGF2α.	Kuwayama, Y. and A. Nomura, Prospective observational post-marketing study of tafluprost for glaucoma and ocular hypertension: short-term efficacy and safety. Adv Ther, 2014. 31(4): p. 461-71.
T12401	Pemigatinib	INCB054828	1513857-77-6	CCN(C(N(C(C(F)=C(OC)C=C1OC)=C1F)C2)=O)C(C2=CN3)=C4C3=NC(CN5CCOCC5)=C4	C24H27F2N5O4	487.5	FDA		Cancer	Angiogenesis; Tyrosine Kinase/Adaptors	FGFR	FGFR; FGFR1; FGFR2; FGFR3; FGFR4	Pemigatinib is an orally active, selective inhibitor of FGFR(IC50s of 0.4 nM, 0.5 nM, 1.2 nM, 30 nM for FGFR1, FGFR2, FGFR3, FGFR4, respectively).	Arudra K, et al. Calcinosis cutis dermatologic toxicity associated with fibroblast growth factor receptor inhibitor for the treatment of Wilms tumor. J Cutan Pathol. 2018 Oct;45(10):786-790.
T15732	Ribociclib succinate	LEE011 succinate	1374639-75-4	OC(=O)CCC(O)=O.CN(C)C(=O)c1cc2cnc(Nc3ccc(cn3)N3CCNCC3)nc2n1C1CCCC1	C27H36N8O5	552.63	FDA		Cancer	Cell Cycle/Checkpoint	CDK	CDK; CDK4; CDK6	Ribociclib succinate is a highly specific CDK4/6 inhibitor (IC50: 10 nM and 39 nM, respectively). It also is over 1,000-fold less potent against the cyclin B/CDK1 complex.	VanArsdale T, et al. Molecular Pathways: Targeting the Cyclin D-CDK4/6 Axis for Cancer Treatment. Clin Cancer Res. 2015 Jul 1;21(13):2905-10.
TQ0319	Ripasudil	Ripasudil hydrochloride dihydrate; K-115	887375-67-9	O.O.Cl.C[C@H]1CNCCCN1S(=O)(=O)c1cccc2cncc(F)c12	C15H23ClFN3O4S	395.88	PMDA		Others	Cell Cycle/Checkpoint; Cytoskeletal Signaling; Stem Cells	ROCK	ROCK; ROCK1; ROCK2	Ripasudil (K-115) hydrochloride dihydrate is a specific ROCK inhibitor (IC50s: 51/19 nM for ROCK1/ROCK2).	Isobe T, et al. Effects of K-115, a rho-kinase inhibitor, on aqueous humor dynamics in rabbits. Curr Eye Res. 2014 Aug;39(8):813-22.
T8544	Masitinib mesylate	AB-1010 mesylate	1048007-93-7	CS(O)(=O)=O.CN1CCN(Cc2ccc(cc2)C(=O)Nc2ccc(C)c(Nc3nc(cs3)-c3cccnc3)c2)CC1	C29H34N6O4S2	594.75	EMA		Cancer	Angiogenesis; Cytoskeletal Signaling; Tyrosine Kinase/Adaptors; Apoptosis	Apoptosis; c-Kit; FAK; FGFR; PDGFR; Src	Apoptosis; c-Kit; FAK; FGFR; FGFR3; Kit; LCK; Lyn; PDGFR; PDGFRα; PDGFRβ; Src	Masitinib mesylate is a selective and orally bioavailable c-Kit inhibitor (IC50 of 200 nM,540/800 nM,510 nM for human recombinant c-Kit;PDGFRα/β;LynB,respectively).	Dubreuil P, et al. Masitinib (AB1010), a Potent and Selective Tyrosine Kinase Inhibitor Targeting KIT. PLoS One, 2009, 4(9), e7258.
T8541	Lenvatinib mesylate	E7080 (mesylate)	857890-39-2	CS(O)(=O)=O.COc1cc2nccc(Oc3ccc(NC(=O)NC4CC4)c(Cl)c3)c2cc1C(N)=O	C22H23ClN4O7S	522.96	FDA		Cancer	Angiogenesis; Tyrosine Kinase/Adaptors; Apoptosis	c-Kit; c-RET; FGFR; PDGFR; VEGFR	c-Kit; FGFR; FGFR1; PDGFR; PDGFRα; PDGFRβ; RET; VEGFR; VEGFR1; VEGFR3	Lenvatinib mesylate is an oral and multi-targeted inhibitor of VEGFR1-3, FGFR1-4, PDGFR, KIT, and RET, with potent antitumor activities.	Suyama K, et al. Lenvatinib: A Promising Molecular Targeted Agent for Multiple Cancers. Cancer Control. 2018 Jan-Dec;25(1):1073274818789361.
T21312	Afatinib	Afatinib free base; BIBW 2992	850140-72-6	O=C(NC1=C(C=C2C(C(NC3=CC(Cl)=C(C=C3)F)=NC=N2)=C1)O[C@]4CCOC4)/C=C/CN(C)C	C24H25ClFN5O3	485.94	FDA		Cancer	Angiogenesis; JAK/STAT signaling; Tyrosine Kinase/Adaptors; Autophagy	Autophagy; EGFR	Autophagy; EGFR	Afatinib is an irreversible inhibitor of EGFR family (EGFR-wt, EGFR-L858R, EGFR-L858R/T790M and HER2 with IC50s of 0.5 nM, 0.4 nM, 10 nM and 14 nM , respectively).	Wong CH, et al. Preclinical evaluation of afatinib (BIBW2992) in esophageal squamous cell carcinoma (ESCC). Am J Cancer Res. 2015 Nov 15;5(12):3588-99.
T1791L	Ceritinib dihydrochloride	LDK378 dihydrochloride; Ceritinib dihydrochloride	1380575-43-8	Cl.Cl.CC(C)Oc1cc(C2CCNCC2)c(C)cc1Nc1ncc(Cl)c(Nc2ccccc2S(=O)(=O)C(C)C)n1	C28H38Cl3N5O3S	631.06	FDA		Cancer	Angiogenesis; Tyrosine Kinase/Adaptors	ALK; IGF-1R	ALK; IGF-1R; Insulin Receptor	Ceritinib dihydrochloride is a selective, orally bioavailable and ATP-competitive inhibitor of ALK tyrosine kinase(IC50 of 200 pM), and also inhibits IGF-1R, InsR, and STK22D (IC50 values of 8, 7, and 23 nM, respectively), shows great antitumor potency	Hu J , Zhang W , Liu Y , et al. LDK378 inhibits the recruitment of myeloid‐derived suppressor cells to spleen via the p38–GRK2–CCR2 pathway in mice with sepsis[J]. Immunology and Cell Biology, 2019.
T8526	Metformin	1,1-Dimethylbiguanide	657-24-9	CN(C)C(=N)NC(N)=N	C4H11N5	129.16	FDA		Metabolism;Endocrine system	Autophagy; PI3K/Akt/mTOR signaling	AMPK; Autophagy; Mitophagy	AMPK; Autophagy; Mitophagy	Metformin is an AMP-activated protein kinase (AMPK) activator that improves glycemic control by improving insulin sensitivity and decreasing intestinal absorption of glucose.	Quaile M P , Melich D H , Jordan H L , et al. Toxicity and toxicokinetics of metformin in rats[J]. Toxicology & Applied Pharmacology, 2010, 243(3):340-347.
T5016	Tofogliflozin (hydrate)	Tofogliflozin hydrate; CSG-452 hydrate	1201913-82-7	O.CCc1ccc(Cc2ccc3CO[C@]4(O[C@H](CO)[C@@H](O)[C@H](O)[C@H]4O)c3c2)cc1	C22H28O7	404.45	EMA		Metabolism	GPCR/G Protein; Immunology/Inflammation; Metabolism; NF-κB	Reactive Oxygen Species; ROS; SGLT	Reactive Oxygen Species; ROS; SGLT; SGLT2	Tofogliflozin hydrate is a potent and highly specific inhibitor of SGLT2(IC50 of 2.9 nM and Ki values of 2.9 nM, 14.9 nM, and 6.4 nM for human, rat, and mouse SGLT2).	Ishibashi Y, et al. Tofogliflozin, A Highly Selective Inhibitor of SGLT2 Blocks Proinflammatory and Proapoptotic Effects of Glucose Overload on Proximal Tubular Cells Partly by Suppressing Oxidative Stress Generation. Horm Metab Res. 2016 Mar;48(3):191-5.
TQ0277	Pralsetinib	Blu667	2097132-94-8	COC1(CCC(CC1)C1=NC(C)=CC(NC2=NNC(C)=C2)=N1)C(=O)N[C@@H](C)C1=CN=C(C=C1)N1C=C(F)C=N1	C27H30FN9O2	533.6	FDA		Cancer	Apoptosis; Tyrosine Kinase/Adaptors	c-RET	RET	Pralsetinib (BLU-667) is a highly potent, selective RET inhibitor (IC50s: 0.4, 0.3, 0.4, 0.4, and 0.4 nM for WT RET, RET mutants V804L, V804M, M918T and CCDC6-RET fusion).	Subbiah V, et al. Precision Targeted Therapy With BLU-667 for RET-Driven Cancers. American Association for Cancer Research. 10.1158/2159-8290.CD-18-0338.
TQ0210	Savolitinib	Volitinib; HMPL-504; AZD-6094	1313725-88-0	C[C@H](N1N=NC2=NC=C(N=C12)C1=CN(C)N=C1)C1=CN2C=CN=C2C=C1	C17H15N9	345.36	NMPA		Cancer	Tyrosine Kinase/Adaptors	c-Met/HGFR	c-Met; c-Met/HGFR	Savolitinib (AZD-6094) is an effective, selective, and orally bioavailable c-Met inhibitor (IC50s: 5 nM/3 nM for c-Met/p-Met).	Jia H, et al. Discovery of (S)-1-(1-(Imidazo[1,2-a]pyridin-6-yl)ethyl)-6-(1-methyl-1H-pyrazol-4-yl)-1H-[1,2,3]triazolo[4,5-b]pyrazine (volitinib) as a highly potent and selective mesenchymal-epithelial transition factor (c-Met) inhibitor in clinical development for treatment of cancer. J Med Chem. 2014 Sep 25;57(18):7577-89.
TQ0084	Lumateperone Tosylate	ITI-007	1187020-80-9	CC1=CC=C(C=C1)S(O)(=O)=O.[H][C@]12CCN(CCCC(=O)C3=CC=C(F)C=C3)C[C@@]1([H])C1=C3N2CCN(C)C3=CC=C1	C31H36FN3O4S	565.7	FDA		Nervous system	GPCR/G Protein; Neuroscience	5-HT Receptor; Dopamine Receptor	5-HT Receptor; 5-HT2A; Dopamine; SERT	Lumateperone Tosylate is a 5-HT2A receptor antagonist (Ki: 0.54 nM), a SERT blocker (Ki: 61 nM), a partial agonist of presynaptic D2 receptors and an antagonist of postsynaptic D2 receptors (Ki: 32 nM).	Vyas P, et al. An evaluation of lumateperone tosylate for the treatment of schizophrenia. Expert Opin Pharmacother. 2020 Feb;21(2):139-145.
T8474	Dabrafenib Mesylate	GSK2118436 Mesylate; GSK 2118436B	1195768-06-9	CS(O)(=O)=O.CC(C)(C)C1=NC(=C(S1)C1=NC(N)=NC=C1)C1=C(F)C(NS(=O)(=O)C2=C(F)C=CC=C2F)=CC=C1	C24H24F3N5O5S3	615.67	FDA		Cancer	MAPK	Raf	Raf	Dabrafenib Mesylate is a B-Raf inhibitor(IC50s of 0.6 and 5.0 nM for RafV600E and c-Raf, respectively).	Jung B, et al. Anti-septic effects of dabrafenib on HMGB1-mediated inflammatory responses. BMB Rep. 2016 Apr;49(4):214-9.
T7387	Ceftaroline fosamil	TAK-599; PPI0903	400827-46-5	CCON=C(C1=NSC(=N1)NP(=O)(O)O)C(=O)NC2C3N(C2=O)C(=C(CS3)SC4=NC(=CS4)C5=CC=[N+](C=C5)C)C(=O)O.CC(=O)[O-]	C24H25N8O10PS4	744.74	FDA		Immune system	Microbiology/virology	Antibacterial; Antibiotic	Antibiotic; Bacterial	Ceftaroline fosamil is a cephalosporin， with activity against Gram-positive pathogens.	Zhong, Nan Shan, Sun, Tieying, Zhuo, Chao,et,al. Ceftaroline fosamil versus ceftriaxone for the treatment of Asian patients with community-acquired pneumonia: a randomised, controlled, double-blind, phase 3, non-inferiority with nested superiority trial[J]. Lancet Infectious Diseases, 2015, 15(2):161-171.
T4405	Ceftibuten dihydrate	Sch-39720 dihydrate	118081-34-8	C1C=C(N2C(S1)C(C2=O)NC(=O)C(=CCC(=O)O)C3=CSC(=N3)N)C(=O)O.O.O	C15H18N4O8S2	446.46	FDA		Respiratory system;Inflammation	Microbiology/virology	Antibacterial; Antibiotic	Antibiotic; Bacterial	Ceftibuten dihydrate is the dihydrate form of ceftibuten, and is a third-generation cephalosporin with antibacterial activity.	JONES, RONALD N. Ceftibuten: a review of antimicrobial activity, spectrum and other microbiologic features.[J]. Pediatric Infectious Disease Journal, 1995, 14(14):S77-83.
T7133	Anagliptin	SK-0403	739366-20-2	CC1=NN2C=C(C=NC2=C1)C(=O)NCC(C)(C)NCC(=O)N1CCC[C@H]1C#N	C19H25N7O2	383.45	PMDA		Metabolism	Proteases/Proteasome; Ubiquitination	DPP-4; Proteasome	Dipeptidyl Peptidase; DPP-4; DPP-8; DPP-9	Anagliptin is a potent Inhibitor of DPP-4(IC50 of 3.8 nM), for the treatment of type 2 diabetes mellitus.	Ervinna N, et al. Anagliptin, a DPP-4 inhibitor, suppresses proliferation of vascular smooth muscles and monocyte inflammatory reaction and attenuates atherosclerosis in male apo E-deficient mice. Endocrinology. 2013 Mar;154(3):1260-70.
T8462	Enoximone		77671-31-9	CSc1ccc(cc1)C(=O)c1[nH]c(=O)[nH]c1C	C12H12N2O2S	248.3	Germany,France		Cardiovascular system	Metabolism	PDE	PDE3; phosphodiesterase	Enoximone is a selective inhibitor of phosphodiesterase III (PDE3), with treatment of congestive heart failure.	Emiliano Angeloni , Giovanni Melina , Francesco Federici,et al.Preliminary Results of the Multicenter Observational Study With Enoximone in Cardiac Surgery (MOSEC).Observational Study Int J Cardiol. 2018 Oct 15;269:51-55.
T4966	Ufenamate	Flufenamic acid butyl ester; Butyl flufenamate	67330-25-0	CCCCOC(=O)c1ccccc1Nc1cccc(c1)C(F)(F)F	C18H18F3NO2	337.34	PMDA;NMPA		Inflammation	Others	Others	Others	Ufenamate is an anthranilic acid-based anti-inflammatory drug developed for skin diseases	Iino H, et al. Penetration of Ufenamate into Intact, Stripped, or Delipidized Skin Using Different Vehicles. Biol Pharm Bull. 2015;38(10):1645-8.
T5134	Vilanterol trifenatate	GW642444 (trifenatate)	503070-58-4	OC(=O)C(c1ccccc1)(c1ccccc1)c1ccccc1.OCc1cc(ccc1O)[C@@H](O)CNCCCCCCOCCOCc1c(Cl)cccc1Cl	C44H49Cl2NO7	774.77	FDA;PMDA;NMPA		Respiratory system	GPCR/G Protein; Neuroscience	Adrenergic Receptor	Adrenergic Receptor; β1-adrenoceptor; β2-adrenoceptor; β3-adrenoceptor	Vilanterol trifenatate is a long-acting agonist of β2-adrenoceptor (β2-AR) with inherent 24-hour activity(β2-AR, β1-AR and β3-AR pEC50s of 10.37, 6.98 and 7.36, respectively)	Slack RJ, et al. In vitro pharmacological characterization of vilanterol, a novel long-acting β2-adrenoceptor agonist with 24-hour duration of action. J Pharmacol Exp Ther. 2013 Jan;344(1):218-30
T7061	Duloxetine		116539-59-4	CNCC[C@H](Oc1cccc2ccccc12)c1cccs1	C18H19NOS	297.42	FDA		Nervous system	Neuroscience	Serotonin Transporter	Serotonin Transporter; serotonin-norepinephrine reuptake	Duloxetine is an inhibitor of serotonin-norepinephrine reuptake(Ki of 4.6 nM),with treatment of major depressive disorder and generalized anxiety disorder.	Wang, S.Y., J. Calderon, and G. Kuo Wang, Block of neuronal Na+ channels by antidepressant duloxetine in a state-dependent manner. Anesthesiology, 2010. 113(3): p. 655-65.
T8452	Dantrolene		7261-97-4	[O-][N+](=O)c1ccc(cc1)-c1ccc(C=NN2CC(=O)NC2=O)o1	C14H10N4O5	314.25	FDA		Others	Others	Others	Ryanodine receptor	Dantrolene is a postsynaptic muscle relaxant by inhibiting Ca2+ ions release from sarcoplasmic reticulum stores by antagonizing ryanodine receptors.	Diszhazi G , Magyar Z E , Motyan J A , et al. Dantrolene Requires Mg2+ and ATP To Inhibit the Ryanodine Receptor[J]. Molecular Pharmacology, 2019, 96(3):mol.119.116475.
T8482	Ripretinib	DCC-2618	1442472-39-0	CCn1c2cc(NC)ncc2cc(-c2cc(NC(=O)Nc3ccccc3)c(F)cc2Br)c1=O	C24H21BrFN5O2	510.36	FDA		Digestive system;Cancer	Angiogenesis; Tyrosine Kinase/Adaptors; Apoptosis	Apoptosis; c-Kit; FLT; PDGFR; VEGFR	Apoptosis; c-Kit; FLT3; Kit; PDGFR; VEGFR	Ripretinib is an orally bioavailable inhibitor of KIT and PDGFRA.	Schneeweiss M, et al. The KIT and PDGFRA switch-control inhibitor DCC-2618 blocks growth and survival of multiple neoplastic cell types in advanced mastocytosis. Haematologica. 2018 May;103(5):799-809.
T8301	Amaranth	Acid Red 27	915-67-3	O=S(C1=C(O)C(N=NC2=C3C=CC=CC3=C(S(=O)([O-])=O)C=C2)=C4C=CC(S(=O)([O-])=O)=CC4=C1)([O-])=O.[Na+].[Na+].[Na+]	C20H11N2Na3O10S3	604.5		USP42-NF37		Others	Others	Others	Amaranth as a potential component of lifestyle modification to improve cardiovascular risk profiles by modifying cardiovascular risk factors such as cholesterol, diabetes, and hypertension.	Zdeněk Chmelík , Michaela Šnejdrlová , Michal Vrablík.Amaranth as a Potential Dietary Adjunct of Lifestyle Modification to Improve Cardiovascular Risk Profile.Nutr Res. 2019 Dec;72:36-45.
T7902	Ozenoxacin	T-3912	245765-41-7	O=C(C1=CN(C2CC2)C3=C(C=CC(C4=CC(C)=C(NC)N=C4)=C3C)C1=O)O	C21H21N3O3	363.41	FDA		Infection	Microbiology/virology	Antibacterial	Bacterial	Ozenoxacin is a quinolone antibacterial. It shows potent activities against the main microorganisms isolated from soft tissue and skin infections.	López Y, et al. In vitro activity of Ozenoxacin against quinolone-susceptible and quinolone-resistant gram-positive bacteria. Antimicrob Agents Chemother. 2013 Dec;57(12):6389-92.
T7604	Valrubicin	AD-32	56124-62-0	CCCCC(OCC([C@]1(O)CC2=C(C(O)=C3C(C4=C(C(C3=C2O)=O)C=CC=C4OC)=O)[C@@H](O[C@]5C[C@](NC(C(F)(F)F)=O)[C@](O)[C@](C)O5)C1)=O)=O	C34H32F3NO13	723.64	FDA	USP42-NF37	Cancer	Chromatin/Epigenetic; Cytoskeletal Signaling; Microbiology/virology	Antibiotic; PKC	Antibiotic; PKC	Valrubicin (AD 32) inhibits TPA- and PDBu-induced PKC activation (IC50s: 0.85 and 1.25 μM) and has antitumor and anti-inflammatory activity.	Chuang LF, et al. Activation of human leukemia protein kinase C by tumor promoters and its inhibition by N-trifluoroacetyladriamycin-14-valerate (AD 32). Biochem Pharmacol. 1992 Feb 18;43(4):865-72.
TQ0200	Paricalcitol		131918-61-1	CC(C=CC(C)C(C)(C)O)C1CCC2C1(CCCC2=CC=C3CC(CC(C3)O)O)C	C27H44O3	416.64	FDA		Cancer	Metabolism	Vitamin	VD/VDR; vitamin D receptor	Paricalcitol is a vitamin D receptor agonist. It is used for the prevention and treatment of secondary hyperparathyroidism associated with chronic renal failure.	Martinez-Moreno JM, et al. In vascular smooth muscle cells paricalcitol prevents phosphate-induced Wnt/beta-catenin activation. Am J Physiol Renal Physiol. 2012 Aug 8.
T8395	Nomegestrol acetate		58652-20-3	[H][C@@]12CC[C@](OC(C)=O)(C(C)=O)[C@@]1(C)CC[C@]1([H])[C@@]3([H])CCC(=O)C=C3C(C)=C[C@@]21[H]	C23H30O4	370.48	EMA		Reproductive system	Others	progesterone receptor	progesterone receptor	Nomegestrol acetate is a widely used progestin-like drug,which is characterized as a full agonist at the progesterone receptor	Pierre-Olivier, Champagne, Thibault,et al. Combined hormonal influence of cyproterone acetate and nomegestrol acetate on meningioma: a case report.[J]. Acta Neurochirurgica, 2019.
T8146	Imidocarb dipropionate		55750-06-6	CCC(O)=O.CCC(O)=O.O=C(Nc1cccc(c1)C1=NCCN1)Nc1cccc(c1)C1=NCCN1	C25H32N6O5	496.56		Martindale:The Extra Pharmacopoeia		Microbiology/virology	Antibiotic; Parasite	Antibiotic; Parasite	Imidocarb dipropionate is an antigenic insecticide, is active against the protozoan parasite B. bovis (IC50 : 0.87 µg/ml).	Baneth, Gad. Antiprotozoal treatment of canine babesiosis[J]. Veterinary Parasitology, 2018:S0304401718301018.
T8348	Phentolamine		50-60-2	Cc1ccc(cc1)N(CC1=NCCN1)c1cccc(O)c1	C17H19N3O	281.36	FDA		Cardiovascular system;Reproductive system;Cancer	GPCR/G Protein; Neuroscience	Adrenergic Receptor	α1-adrenergic receptor; α2-adrenergic receptor	Phentolamine mesylate is an alpha-1 and alpha-2 selective adrenergic receptor antagonist	Goldstein, I. Oral phentolamine: an alpha-1, alpha-2 adrenergic antagonist for the treatment of erectile dysfunction[J]. international journal of impotence research, 2000, 12:0-0.
T8404	Kasugamycin hydrochloride hydrate	Ksg (hydrochloride hydrate)	200132-83-8	O.Cl.C[C@H]1O[C@H](O[C@@H]2[C@@H](O)[C@@H](O)[C@H](O)[C@H](O)[C@H]2O)[C@@H](N)C[C@@H]1NC(=N)C(O)=O	C14H28ClN3O10	433.84	NMPA		others	Microbiology/virology	Antibacterial; Antibiotic	Antibiotic; Bacterial	Kasugamycin hydrochloride hydrate(Ksg) specifically inhibits translation initiation of canonical but not of leaderless messenger RNAs. Ksg inhibition is thought to occur by direct competition with initiator transfer RNA	Christian Lange , Matthias Lehr , Karolin Zerulla.Effects of Kasugamycin on the Translatome of Escherichia Coli.PLoS One. 2017 Jan 12;12(1):e0168143.
T8389	Trifluoperazine		117-89-5	CN1CCN(CCCN2c3ccccc3Sc3ccc(cc23)C(F)(F)F)CC1	C21H24F3N3S	407.5	FDA		Nervous system	Autophagy; GPCR/G Protein; Neuroscience; Membrane transporter/Ion channel; Microbiology/virology	Adrenergic Receptor; Autophagy; CaMK; Dopamine Receptor; Influenza Virus; P-gp	Adrenergic Receptor; Autophagy; CaMK; D2; Dopamine; Influenza Virus; P-gp (P-glycoprotein)	Trifluoperazine is a Dopamine D2 receptor inhibitor(IC50 : 1.2 nM), and Treatment of schizophrenia.	Magdolna, Tardy, Markus,et al. Trifluoperazine versus low-potency first-generation antipsychotic drugs for schizophrenia[J]. Cochrane Database of Systematic Reviews, 2014.
T7812	Acitazanolast	MTCC ; WP-871	114607-46-4	OC(=O)C(=O)Nc1cccc(c1)-c1nnn[nH]1	C9H7N5O3	233.19	PMDA		Inflammation	Others	Others	Others	Acitazanolast is an anti-allergic drug candidate.	Kamei C, Mio M, Yoshida T, Saito Y, Toyoda Y, Tsuriya Y. Effect of an active metabolite of the antiallergic agent tazanolast on histamine release from rat mast cells. Arzneimittelforschung. 1997 Apr;47(4):390-4.
T8239	Cromoglicic acid		16110-51-3	OC(COc1cccc2oc(cc(=O)c12)C(O)=O)COc1cccc2oc(cc(=O)c12)C(O)=O	C23H16O11	468.4	USA;Canada		Respiratory system	Others	Others	Others	Cromoglicic acid prevents the release of inflammatory chemicals such as histamine from mast cells.	Tavano L, Nicoletta FP, Picci N, Muzzalupo R. Cromolyn as surface active drug (surfadrug): Effect of the self-association on diffusion and percutaneous permeation. Colloids Surf B Biointerfaces. 2015 Dec 8;139:132-137.
T8359	Lanreotide acetate (108736-35-2 free base)	BIM 23014 (acetate)	2378114-72-6	[H]N(CCCCC1N(C(C(N(C(C(N(C(C(N(C(C(N([H])[H])CC2=CC3=CC=CC=C3C=C2)=O)[H])CSSCC(C(N(C(C(N([H])[H])=O)C(O)C)[H])=O)N(C(C(C(C)C)N(C1=O)[H])=O)[H])=O)[H])CC4=CC=C(C=C4)O)=O)[H])CC5=CN(C6=CC=CC=C56)[H])=O)[H])[H].CC(O)=O	C54H69N11O10S2	1096.33	FDA		Nervous system;Endocrine system;Cancer	Others	Others	Others	Lanreotide acetate is a somatostatin analogue with antineoplastic activity, used for carcinoid syndrome	Ning S, et al. Lanreotide promotes apoptosis and is not radioprotective in GH3 cells.Endocr Relat Cancer. 2009 Sep;16(3):1045-55.
T8365	Methenamine Hippurate		5714-73-8	C1N2CN3CN1CN(C2)C3.OC(=O)CNC(=O)c1ccccc1	C15H21N5O3	319.36	FDA		Urinary system;infection	Microbiology/virology	Antibacterial	Bacterial	Methenamine Hippurate is a component of Hiprex, with antibacterial activity.	Lee B S , Bhuta T , Craig J C , et al. Methenamine hippurate for preventing urinary tract infections[J]. Cochrane database of systematic reviews (Online), 2002, 10(1):CD003265.
T8380	Bendamustine	SDX105	16506-27-7	Cn1c(CCCC(O)=O)nc2cc(ccc12)N(CCCl)CCCl	C16H21Cl2N3O2	358.26	FDA		Cancer	Apoptosis; DNA Damage/DNA Repair	Apoptosis; DNA Alkylator/Crosslinker	Apoptosis; DNA Alkylator/Crosslinker	Bendamustine for the treatment of Non-Hodgkin Lymphomas and Chronic Lymphocytic Leukemia	Patekar M B , Milunovi V , Jakobac K M , et al. Bendamustine: an Old Drug in the New Era for Patients with Non-Hodgkin Lymphomas and Chronic Lymphocytic Leukemia[J]. Acta Clinica Croatica, 2018, 57(3):542-553.
T8381	Amodiaquine		86-42-0	CCN(CC)Cc1cc(Nc2ccnc3cc(Cl)ccc23)ccc1O	C20H22ClN3O	355.86	FDA		Immune system;Infection	Chromatin/Epigenetic; Microbiology/virology	Histone Methyltransferase; Parasite	Histone Methyltransferase; Nurr1; Parasite	Amodiaquine is a synthetic aminoquinoline, used to treat malaria.	Keita, Kinoshita, Kosei,et al. A Nurr1 agonist amodiaquine attenuates inflammatory events and neurological deficits in a mouse model of intracerebral hemorrhage.[J]. Journal of Neuroimmunology, 2019.
T8382	Cariprazine hydrochloride	Cariprazine HCl; RGH188 hydrochloride	1083076-69-0	Cl.CN(C)C(=O)N[C@H]1CC[C@H](CCN2CCN(CC2)c2cccc(Cl)c2Cl)CC1	C21H33Cl3N4O	463.87	FDA		Nervous system	GPCR/G Protein; Neuroscience	5-HT Receptor; Dopamine Receptor	5-HT Receptor; D2; D3; Dopamine	Cariprazine HCl is an antipsychotic drug, is a D3 and D2 receptor partial agonist((Ki of 0.085 nM and 0.49 nM, respectively)	Seneca N, et al. Occupancy of dopamine D2 and D3 and serotonin 5-HT1A receptors by the novel antipsychotic drug candidate, cariprazine (RGH-188), in monkey brain measured using positron emission tomography. Psychopharmacology (Berl). 2011 Dec;218(3):579-8
T8384	Gatifloxacin hydrochloride	AM-1155 (hydrochloride) ; BMS-206584 (hydrochloride) ; PD135432 (hydrochloride)	121577-32-0	Cl.COc1c(N2CCNC(C)C2)c(F)cc2c1n(cc(C(O)=O)c2=O)C1CC1	C19H23ClFN3O4	411.86	FDA	JP17	Inflammation;Immune system;infection	DNA Damage/DNA Repair; Microbiology/virology	Antibacterial; Antibiotic; Topoisomerase	Antibiotic; Bacterial; Topoisomerase	Gatifloxacin hydrochloride is an antibiotic of the fourth-generation fluoroquinolone family, which can inhibit the bacterial enzyme DNA rotase and topoisomerase IV.	Jensen, H., et al., Comparison of ophthalmic gatifloxacin 0.3% and ciprofloxacin 0.3% in healing of corneal ulcers associated with Pseudomonas aeruginosa-induced ulcerative keratitis in rabbits. J Ocul Pharmacol Ther, 2005. 21(1): p. 36-43.
T8385	Metoclopramide hydrochloride hydrate	Metoclopramide monohydrochloride monohydrate	54143-57-6	O.Cl.CCN(CC)CCNC(=O)c1cc(Cl)c(N)cc1OC	C14H25Cl2N3O3	354.27	FDA	JP17,USP42-NF37	Digestive system	GPCR/G Protein; Neuroscience	5-HT Receptor; Dopamine Receptor	5-HT Receptor; D2; Dopamine	Metoclopramide hydrochloride hydrate is a dopamine D2 antagonist that is a drug used for digestive dysfunction. It acts as an anti-emetic	Shakhatreh M , Jehangir A , Malik Z , et al. Metoclopramide for the treatment of diabetic gastroparesis[J]. Expert Review of Gastroenterology and Hepatology, 2019, 13(8).
T8386	Esomeprazole Magnesium trihydrate	(S)-Omeprazole magnesium trihydrate	217087-09-7	O.O.O.[Mg++].COc1ccc2[n-]c(nc2c1)S(=O)Cc1ncc(C)c(OC)c1C.COc1ccc2[n-]c(nc2c1)S(=O)Cc1ncc(C)c(OC)c1C	C34H42MgN6O9S2	767.17	FDA		Digestive system	Membrane transporter/Ion channel	Proton pump	Proton pump	Esomeprazole Magnesium trihydrate is a proton pump inhibitor indicated for the short-term treatment of gastroesophageal reflux disease in patients with a history of erosive esophagitis.Esomeprazole magnesium trihydrate acts as an exosome inhibitor by blocking the exosome release via the inhibition of V-H+-ATPases	Johnson TJ, Hedge DD. Esomeprazole: a clinical review. Am J Health Syst Pharm. 2002 Jul 15;59(14):1333-9.
T8388	Vonoprazan	TAK-438 (free base)	881681-00-1	CNCc1cc(-c2ccccc2F)n(c1)S(=O)(=O)c1cccnc1	C17H16FN3O2S	345.39	PMDA;NMPA		Digestive system	Membrane transporter/Ion channel	Proton pump	potassium-competitive acid; Proton Pump	Vonoprazan is an orally active potassium-competitive acid blocker.Vonoprazan can be used for the treatment of gastroduodenal ulcer and reflux esophagitis	Hori Y, et al. A study comparing the antisecretory effect of TAK-438, a novel potassium-competitive acid blocker, with lansoprazole in animals. J Pharmacol Exp Ther, 2011, 337(3), 797-804.
T8390	Cefazolin		25953-19-9	[H][C@]12SCC(CSc3nnc(C)s3)=C(N1C(=O)[C@H]2NC(=O)Cn1cnnn1)C(O)=O	C14H14N8O4S3	454.51	FDA		Immune system;Respiratory system;Infection	Microbiology/virology	Antibacterial; Antibiotic	Antibiotic; Bacterial	Cefazolin is a semi-synthetic cephalosporin that has a broad spectrum of antibacterial activity and inhibits the synthesis of bacterial cell walls.	Gabriela, A, Albarellos,et al. Cefazolin pharmacokinetics in cats under surgical conditions.[J]. Journal of Feline Medicine & Surgery, 2017.
T8392	L(+)-Asparagine monohydrate		5794-13-8	O.N[C@@H](CC(N)=O)C(O)=O	C4H10N2O4	150.13	NMPA		Others	Metabolism	Endogenous Metabolite	Endogenous Metabolite; Human Endogenous Metabolite	L(+)-Asparagine monohydrate is a non-essential amino acid, participate in neurological and metabolic regulation of tissue cell function.	Christie B D , Rapoport H . ChemInform Abstract: SYNTHESIS OF OPTICALLY PURE PIPECOLATES FROM L-ASPARAGINE. APPLICATION TO THE TOTAL SYNTHESIS OF (+)-APOVINCAMINE THROUGH AMINO ACID DECARBONYLATION AND IMINIUM ION CYCLIZATION[J]. Chemischer Informationsdienst, 1985, 16(35).
T8394	D-Serine	(R)-Serine	312-84-5	N[C@H](CO)C(O)=O	C3H7NO3	105.09	NMPA		Others	Membrane Transporter/Ion Channel; Neuroscience; Metabolism	Endogenous Metabolite; iGluR; NMDAR	Endogenous Metabolite; iGluR; NMDA receptor	(R)-Serine is an endogenous amino acid,is a potent co-agonist at the NMDA glutamate receptor.	Dai X, et al. D-Serine made by serine racemase in Drosophila intestine plays a physiological role in sleep. Nat Commun. 2019 May 7;10(1):1986.
T8396	Prednisone acetate	Prednisone 21-acetate	125-10-0	[H][C@@]12CC[C@](O)(C(=O)COC(C)=O)[C@@]1(C)CC(=O)[C@@]1([H])[C@@]2([H])CCC2=CC(=O)C=C[C@]12C	C23H28O6	400.46	FDA		Cardiovascular system;Digestive system;Endocrine system;Inflammation;Nervous system;Respiratory system;Cancer	Endocrinology/Hormones	Glucocorticoid Receptor	Glucocorticoid Receptor	Prednisone acetate is a glucocorticoid receptor agonist with immunomodulating properties and anti-inflammatory.	Williams J R , Moore R H , Li R , et al. ChemInform Abstract: STRUCTURE AND PHOTOCHEMISTRY OF LUMIPREDNISONE AND LUMIPREDNISONE ACETATE[J]. Chemischer Informationsdienst, 1979, 10(47).
T8397	Ixazomib citrate	MLN9708	1239908-20-3	CC(C)C[C@H](NC(=O)CNC(=O)c1cc(Cl)ccc1Cl)B1OC(=O)C(CC(O)=O)(CC(O)=O)O1	C20H23BCl2N2O9	517.12	FDA		Cancer	Autophagy; Proteases/Proteasome; Ubiquitination	Autophagy; Proteasome	Autophagy; Proteasome	Ixazomib citrate is a prodrug of Ixazomib (MMLN-2238). MLN9708 is an orally bioavailable second generation proteasome inhibitor (IC50 of 3.4 nM ) with potential antineoplastic activity.	Chauhan D, et al. In vitro and in vivo selective antitumor activity of a novel orally bioavailable proteasome inhibitor MLN9708 against multiple myeloma cells. Clin Cancer Res. 2011 Aug 15;17(16):5311-21.
T8399	Crizotinib hydrochloride	PF-02341066 hydrochloride	1415560-69-8	Cl.C[C@@H](Oc1cc(cnc1N)-c1cnn(c1)C1CCNCC1)c1c(Cl)ccc(F)c1Cl	C21H23Cl3FN5O	486.8	FDA		Respiratory system;Cancer	Angiogenesis; Tyrosine Kinase/Adaptors; Autophagy; Immunology/Inflammation	ALK; Autophagy; c-Met/HGFR; ROS	ALK; Autophagy; c-Met; c-Met/HGFR; ROS	Crizotinib hydrochloride is a novel inhibitor of anaplastic lymphoma kinase and c-Met(IC50s of 20 and 8 nM)	Christensen JG, et al. Cytoreductive antitumor activity of PF-2341066, a novel inhibitor of anaplastic lymphoma kinase and c-Met, in experimental models of anaplastic large-cell lymphoma. Mol Cancer Ther. 2007, 6(12 Pt 1), 3314-3322.
T8400	Pamidronic acid		40391-99-9	NCCC(O)(P(O)(O)=O)P(O)(O)=O	C3H11NO7P2	235.07	NMPA		Cancer	Cytoskeletal Signaling; Stem Cells	Wnt/beta-catenin	Wnt; β-catenin	Pamidronic acid Leads to Bone Necrosis via Suppression of Wnt/β-Catenin Signaling in Human Bone Marrow Mesenchymal Stem Cells	Pamidronate Disodium Leads to Bone Necrosis via Suppression of Wnt/β-Catenin Signaling in Human Bone Marrow Mesenchymal Stem Cells In Vitro. J Oral Maxillofac Surg. 2017 Mar 22.
T8401	Efonidipine hydrochloride monoethanolate	NZ-105 hydrochloride monoethanolate	111011-76-8	Cl.CCO.CC1=C(C(c2cccc(c2)[N+]([O-])=O)C(=C(C)N1)P1(=O)OCC(C)(C)CO1)C(=O)OCCN(Cc1ccccc1)c1ccccc1	C36H45ClN3O8P	714.18	PMDA		Cardiovascular system	Membrane transporter/Ion channel; Metabolism	Calcium Channel	Calcium Channel	Efonidipine hydrochloride monoethanolate is a Ca(2+)-channel Blocker, Enhances the Production of Dehydroepiandrosterone Sulfate in NCI-H295R Human Adrenocortical Carcinoma Cells	Ikeda K, et al. Efonidipine, a Ca(2+)-channel blocker, enhances the production of dehydroepiandrosterone sulfate in NCI-H295R human adrenocortical carcinoma cells. Tohoku J Exp Med. 2011;224(4):263-71.
T8402	Regorafenib Hydrochloride	BAY73-4506 hydrochloride	835621-07-3	Cl.CNC(=O)c1cc(Oc2ccc(NC(=O)Nc3ccc(Cl)c(c3)C(F)(F)F)c(F)c2)ccn1	C21H16Cl2F4N4O3	519.28	FDA		Urinary system;Cancer	Angiogenesis; Tyrosine Kinase/Adaptors; Apoptosis; Autophagy; MAPK	Autophagy; c-RET; PDGFR; Raf; VEGFR	Autophagy; PDGFR; Raf; Raf-1; RET; VEGFR	Regorafenib Hydrochloride is a new oral multikinase inhibitor of angiogenic, stromal and oncogenic receptor tyrosine kinases with potent preclinical antitumor activity	Wilhelm SM, et al. Regorafenib (BAY 73-4506): a new oral multikinase inhibitor of angiogenic, stromal and oncogenic receptor tyrosine kinases with potent preclinical antitumor activity. Int J Cancer, 2011, 129(1), 245-255.
T8403	Cinacalcet	AMG 073	226256-56-0	C[C@@H](NCCCc1cccc(c1)C(F)(F)F)c1cccc2ccccc12	C22H22F3N	357.41	FDA		Urinary system;Endocrine system	GPCR/G Protein	CaSR	CaSR	Cinacalcet is an orally active, allosteric Ca receptor (CaR) agonist, treatment of cardiovascular disease .	D.A. Bushinsky, et al. Effect of cinacalcet on urine calcium excretion and supersaturation in genetic hypercalciuric stone-forming rats. Kidney Int. 2006 May;69(9):1586-92.
T8383	Cyclopentolate Hydrochloride		5870-29-1	Cl.CN(C)CCOC(=O)C(c1ccccc1)C1(O)CCCC1	C17H26ClNO3	327.85	FDA, PMDA		Others	Neuroscience	AChR	M5 mAChR; mAChR	Cyclopentolate Hydrochloride is a muscarinic acetylcholine receptors antagonist with Kis of 1.62, 27.5, and 2.63 nM for M1, M2, and M3 receptors, respectively.	Ishikawa H , Desantis L , Patil P N . Selectivity of Muscarinic Agonists Including (±)-Aceclidine and Antimuscarinics on the Human Intraocular Muscles[J]. Journal of Ocular Pharmacology & Therapeutics, 1998, 14(4):363-373.
T8149	Dobutamine hydrochloride	Dobutamine (hydrochloride)	49745-95-1	Cl.CC(CCc1ccc(O)cc1)NCCc1ccc(O)c(O)c1	C18H24ClNO3	337.84	FDA, PMDA	JP17,USP42-NF37	Cardiovascular system	GPCR/G Protein; Neuroscience	Adrenergic Receptor	Adrenergic Receptor	Dobutamine (hydrochloride) is a catecholamine that acts as a β-adrenergic receptor agonist with potent positive inotropic effects.	Tyrankiewicz U , et al. Characterization of the cardiac response to a low and high dose of dobutamine in the mouse model of dilated cardiomyopathy by MRI in vivo. J Magn Reson Imaging. 2013 Mar;37(3):669-77.
T8173	Delafloxacin meglumine	ABT492 meglumine ; RX-3341 meglumine ; WQ-3034 meglumine	352458-37-8	CNC[C@H](O)[C@@H](O)[C@H](O)[C@H](O)CO.Nc1nc(c(F)cc1F)-n1cc(C(O)=O)c(=O)c2cc(F)c(N3CC(O)C3)c(Cl)c12	C25H29ClF3N5O9	635.97	FDA, EMA		Digestive system;Infection	Microbiology/virology	Antibacterial; Antibiotic	Antibiotic; Bacterial	Delafloxacin meglumine is a broad-spectrum fluoroquinolone antibiotic	Lepak AJ, et al. In Vivo Pharmacodynamic Target Assessment of Delafloxacin against Staphylococcus aureus, Streptococcus pneumoniae, and Klebsiella pneumoniae in a Murine Lung Infection Model. Antimicrob Agents Chemother. 2016 Jul 22;60(8):4764-9.
T8363	DL-Serine		302-84-1	NC(CO)C(O)=O	C3H7NO3	105.09		Martindale:The Extra Pharmacopoeia		Metabolism	PKM	pyruvate kinase	DL-Serine is a non-essential amino acid and a natural ligand and allosteric activator of pyruvate kinase M2.	Barbara Chaneton , Petra Hillmann,et al.Serine Is a Natural Ligand and Allosteric Activator of Pyruvate Kinase M2.nature .2012 Nov 15;491(7424):458-462.
T8222	Selpercatinib	LOXO-292	2152628-33-4	COc1ccc(CN2C3CC2CN(C3)c2ccc(cn2)-c2cc(OCC(C)(C)O)cn3ncc(C#N)c23)cn1	C29H31N7O3	525.6	FDA		Cancer	Apoptosis; Tyrosine Kinase/Adaptors	c-RET	RET	Selpercatinib is a tyrosine kinase inhibitor with antineoplastic properties(IC50 of 14.0 nM, 24.1 nM, and 530.7 nM for RET (WT), RET (V804M) , and RET (G810R), respectively)	Steven W. Andrews, et al. Substituted pyrazolo[1,5-a]pyridine compounds as ret kinase inhibitors. WO2018071447A1.
T8151	Mobocertinib	tak788	1847461-43-1	COc1cc(N(C)CCN(C)C)c(NC(=O)C=C)cc1Nc1ncc(C(=O)OC(C)C)c(n1)-c1cn(C)c2ccccc12	C32H39N7O4	585.71	FDA		Respiratory system;Cancer	Angiogenesis; JAK/STAT signaling; Tyrosine Kinase/Adaptors	EGFR	EGFR	Mobocertinib is a potent inhibitor of epidermal growth factor receptor (EGFR) and an antineoplastic agent	Landon J. DURAK, et al. Pharmaceutical salts of pyrimidine derivatives and method of treating disorders. WO2019222093A1.
T8360	β-Pinene	(-)-β-Pinene; Nopinene	18172-67-3	CC1(C)[C@@H]2C[C@H]1C(=C)CC2	C10H16	136.23		BP2013		Microbiology/virology	Antibacterial	Bacterial	(-)-β-Pinene is inhibit infectious bronchitis virus (IBV) with an IC50 of 1.32 mM,with antimicrobial activity	Yang Z , et al. Comparative anti-infectious bronchitis virus (IBV) activity of (-)-pinene: effect on nucleocapsid (N) protein. Molecules. 2011 Jan 25;16(2):1044-54.
T8362	Benzamidine hydrochloride	Benzamidine HCl	1670-14-0	Cl.NC(=N)c1ccccc1	C7H9ClN2	156.61		Martindale the Extra Pharmacopoei		Cell Cycle/Checkpoint; Metabolism; Proteases/Proteasome	Serine Protease; Serine/threonin kinase	Ser/Thr Protease; Serine Protease	Benzamidine HCl is a reversible inhibitor of serine proteases, including trypsin, plasmin, and thrombin (Ki of 35, 350, and 220 µM, respectively).	Pilon A M , Campos W G , Silva C R , et al. Protease inhibitory, insecticidal and deterrent effects of the trypsin-inhibitor benzamidine on the velvetbean caterpillar in soybean[J]. Anais Da Academia Brasileira De Ciências, 2018.
T8223	Avacopan	CCX168	1346623-17-3	Cc1ccc(NC(=O)[C@H]2CCCN([C@H]2c2ccc(NC3CCCC3)cc2)C(=O)c2c(C)cccc2F)cc1C(F)(F)F	C33H35F4N3O2	581.6	FDA,PMDA		Immune system	Immunology/Inflammation	Complement System	complement 5a receptor (C5aR)	Avacopan is an orally administered small-molecule C5aR ( IC50 : 0.1 nM.)antagonist that blocks the effects of C5a and prevents the development of GN induced by anti-myeloperoxidase antibodies in a murine model of AAV.	Bekker P, et al. Characterization of Pharmacologic and Pharmacokinetic Properties of CCX168, a Potent and Selective Orally Administered Complement 5a Receptor Inhibitor, Based on Preclinical Evaluation and Randomized Phase 1 Clinical Study. PLoS One. 2016 Oct 21;11(10):e0164646.
T8217	Enzalutamide carboxylic acid		1242137-15-0	CC1(C)N(C(=S)N(C1=O)c1ccc(C#N)c(c1)C(F)(F)F)c1ccc(C(O)=O)c(F)c1	C20H13F4N3O3S	451.4	FDA		Cancer	Endocrinology/Hormones; Metabolism	Androgen Receptor; Drug Metabolite	Androgen Receptor; Drug Metabolite	Enzalutamide carboxylic acid is an antagonist of androgen receptor (AR) .	van Nuland M, et al. Exposure-Response Assessment of Enzalutamide and Its Major Metabolites in a Real-World Cohort of Patients with Metastatic Castration-Resistant Prostate Cancer. Pharmacotherapy. 2019 Dec;39(12):1137-1145.
T5041	Faropenem sodium		122547-49-3	[Na+].[H][C@]12SC([C@H]3CCCO3)=C(N1C(=O)[C@]2([H])[C@@H](C)O)C([O-])=O	C12H14NNaO5S	307.3	NMPA		Inflammation;Infection	Microbiology/virology	Antibacterial; Antibiotic	Antibiotic; Bacterial	Faropenem sodium is an orally bioavailable penem antibiotic which can efficiently kill Mycobacterium tuberculosis.It treatment of tuberculosis and community-acquired pneumonia.	Uchino H , Tamai I , Yabuuchi H , et al. Faropenem Transport across the Renal Epithelial Luminal Membrane via Inorganic Phosphate Transporter Npt1[J]. Antimicrobial Agents & Chemotherapy, 2000, 44(3):574-577.
T8073	Disodium succinate	Sodium succinate; Disodium succinate	150-90-3	C(CC(=O)[O-])C(=O)[O-].[Na+].[Na+]	C4H4Na2O4	162.05		USP42-NF37		Others	Others	Others	Sodium succinate is the sodium salt form of succinate, which is an important metabolite at the cross-road of several metabolic pathways and involved in the formation and elimination of reactive oxygen species.	Zhang YJ, et al. Optimization of succinic acid fermentation with Actinobacillus succinogenes by response surface methodology (RSM). J Zhejiang Univ Sci B. 2012 Feb;13(2):103-10.
T8286	Harringtonine		26833-85-2	CC(C)(CC[C@@](CC(=O)OC)(C(=O)O[C@H]1[C@H]2C3=CC4=C(C=C3CCN5[C@@]2(CCC5)C=C1OC)OCO4)O)O	C28H37NO9	531.59	NMPA		Cancer	Microbiology/virology	Influenza Virus	Influenza Virus	Harringtonine, a natural Cephalotaxus alkaloid, inhibits protein synthesis.	Fresno M, et al. Inhibition of translation in eukaryotic systems by harringtonine. Eur J Biochem. 1977 Jan;72(2):323-30.
T8183	Deslanoside	Deacetyllanatoside C; Desacetyllanatoside C	17598-65-1	C[C@@H]1[C@H]([C@H](C[C@@H](O1)O[C@H]2CC[C@]3([C@@H](C2)CC[C@@H]4[C@@H]3C[C@H]([C@]5([C@@]4(CC[C@@H]5C6=CC(=O)OC6)O)C)O)C)O)O[C@H]7C[C@@H]([C@@H]([C@H](O7)C)O[C@H]8C[C@@H]([C@@H]([C@H](O8)C)O[C@H]9[C@@H]([C@H]([C@@H]([C@H](O9)CO)O)O)O)O)O	C47H74O19	943.1	FDA;NMPA,PMDA,France,Taiwan		Cardiovascular system	Membrane transporter/Ion channel; Metabolism	ATPase; Drug Metabolite	Drug Metabolite; Na+/K+ ATPase; Na+/K+-ATPase	Deslanoside is a rapidly acting cardiac glycoside used to treat congestive heart failure and supraventricular arrhythmias due to reentry mechanisms. Deslanoside inhibits the Na-K-ATPase membrane pump, resulting in an increase in intracellular sodium and calcium concentrations.	Hauptman PJ, et al. Digitalis. Circulation. 1999 Mar 9;99(9):1265-70.
T3S2100	(-)-Securinine	Securinine; (-)-Securinine	5610-40-2	O=C1O[C@](C2)([C@@H](CCCC3)N3[C@@H]2C=C2)C2=C1	C13H15NO2	217.26	NMPA		nervous system	Membrane transporter/Ion channel; Neuroscience	GABA Receptor	GABA Receptor; GABAA	(-)-Securinine is plant-derived alkaloid and also a GABAA receptor antagonist.	Stefanowicz-Hajduk J, et al. Securinine from Phyllanthus glaucus Induces Cell Cycle Arrest and Apoptosis in Human Cervical Cancer HeLa Cells. PLoS One. 2016 Oct 28;11(10):e0165372.
T8270	Deserpidine	Harmonyl	131-01-1	CO[C@H]1[C@@H](C[C@@H]2CN3CCC4=C([C@H]3C[C@@H]2[C@@H]1C(=O)OC)NC5=CC=CC=C45)OC(=O)C6=CC(=C(C(=C6)OC)OC)OC	C32H38N2O8	578.7	Other countries		Cardiovascular system	Endocrinology/Hormones	RAAS	ACE	Deserpidine is only found in individuals that have used or taken this drug. It is an ester alkaloid drug isolated from Rauwolfia canescens (family Apocynaceae) with antipsychotic and antihypertensive properties that has been used for the control of high blood pressure and for the relief of psychotic behavior.Deserpidine's mechanism of action is through inhibition of the ATP/Mg2+ pump responsible …	Varchi G, et al. Synthesis of deserpidine from reserpine. J Nat Prod. 2005 Nov;68(11):1629-31.
T8118	Bekanamycin	Kanamycin B	4696-76-8	C1[C@@H]([C@H]([C@@H]([C@H]([C@@H]1N)O[C@@H]2[C@@H]([C@H]([C@@H]([C@H](O2)CO)O)N)O)O)O[C@@H]3[C@@H]([C@H]([C@@H]([C@H](O3)CN)O)O)N)N	C18H37N5O10	483.51	Italy;jp		infection	Microbiology/virology	Antibacterial; Antibiotic	Antibiotic; Bacterial	Bekanamycin is an aminoglycoside antibiotic.	Morales MA, et al. Effects of bekanamycin and dibekacin on the electrical activity of cardiac pacemaker cells. Arch Med Res. 1993 Winter;24(4):339-45.
T8262	Fosfomycin sodium	Fosfomycin Disodium	26016-99-9	C[C@@H]1O[C@@H]1P([O-])([O-])=O.[Na+].[Na+]	C3H5Na2O4P	182.02	FDA;PMDA;EMA;NMPA		infection	Microbiology/virology	Antibacterial; Antibiotic	Antibacterial; Antibiotic; Bacterial	Fosfomycin is a bactericidal, low-molecular weight, broad-spectrum antibiotic, with putative activity against several bacteria, including multidrug-resistant Gram-negative bacteria, by irreversibly inhibiting an early stage in cell wall synthesis.	Dijkmans AC, et al. Fosfomycin: Pharmacological, Clinical and Future Perspectives. Antibiotics (Basel). 2017 Oct 31;6(4). pii: E24.
T8071	L-Lysine hydrochloride	Lysine hydrochloride	657-27-2	NCCCC[C@@H](C(O)=O)N.Cl	C6H15ClN2O2	182.65	EMA	JP17,USP42-NF37	Others	Microbiology/virology	Virus Protease	Virus Protease	L-lysine hydrochloride is an essential amino acid for humans with various benefits including treating herpes, increasing calcium absorption, reducing diabetes-related illnesses and improving gut health.	Al-Malki AL, et al. Suppression of acute pancreatitis by L-lysinein mice. BMC Complement Altern Med. 2015 Jun 23;15:193.
T8026	(-)-Limonene	(S)-(−)-Limonene; (-)-Limonene; l-Limonene	5989-54-8	CC([C@@H]1CC=C(C)CC1)=C	C10H16	136.23		EP9.2,USP		Metabolism	Endogenous Metabolite	Human Endogenous Metabolite	(S)-(−)-Limonene is a Monoterpenoids,it can induce a mild bronchoconstrictive effect.	Larsen S T , Hougaard K S , Hammer M , et al. Effects of R-(+)- and S-(-)-limonene on the respiratory tract in mice[J]. Human & Experimental Toxicology, 2000, 19(8):457-466.
T8258	Chloramphenicol succinate sodium	Chloramphenicol sodium succinate; Chloramphenicol succinate sodium	982-57-0	C1=CC(=CC=C1[C@H]([C@@H](CO)NC(=O)C(Cl)Cl)O)[N+](=O)[O-]	C15H15Cl2N2NaO8	445.2	FDA;PMDA		infection	Microbiology/virology	Antibacterial; Antibiotic	Antibiotic; Bacterial	Chloramphenicol sodium succinate is broad-spectrum antibiotic with antibacterial activity.	Ambekar C S , Lee J S K , Cheung B M Y , et al. Chloramphenicol succinate, a competitive substrate and inhibitor of succinate dehydrogenase: possible reason for its toxicity[J]. Toxicology in Vitro, 2004, 18(4):0-447.
T8066	Sulbenicillin disodium	Sulbenicillin Sodium	28002-18-8	CC1([C@@H](N2[C@H](S1)[C@@H](C2=O)NC(=O)C(C3=CC=CC=C3)S(=O)(=O)O)C(=O)O)C.[Na].[Na]	C16H16N2Na2O7S2	458.4	NMPA	KP Ⅹ,JP17	infection	Microbiology/virology	Antibacterial; Antibiotic	Antibiotic; Bacterial	Sulbenicillin Sodium is is a penicillin antibiotic,is a Penicillin antibiotic with antibacterial activity	Eftimiadi C , Leo C D , Schito G C . Antibacterial activity in vitro of sulbenicillin against mucoid and non-mucoid strains of Pseudomonas aeruginosa[J]. Drugs under experimental and clinical research, 1985, 11(4):241-245.
T8046	Tosufloxacin tosylate hydrate	Tosufloxacin p-Toluenesulfonate Hydrate; Tosufloxacin Tosylate Hydrate; T-3262 Tosylate Hydrate; A-61827 tosylate hydrate	1400591-39-0	CC1=CC=C(C=C1)S(=O)(=O)O.C1CN(CC1N)C2=C(C=C3C(=O)C(=CN(C3=N2)C4=C(C=C(C=C4)F)F)C(=O)O)F.O	C26H25F3N4O7S	594.6	NMPA		infection	Microbiology/virology	Antibacterial; Antibiotic	Antibiotic; Bacterial	Tosufloxacin p-Toluenesulfonate Hydrate is a fluoroquinolone antibacterial agent that is used to treat susceptible infections.	Deng F Y , Huang C X , Liu Y . Mn2+-CTMAB-Sensitized Fluorescent Microscopic Determination of Tosufloxacin Tosylate Based on a Self-Ordered Ring[J]. Spectroscopy & Spectral Analysis, 2014, 34(2):445.
T8019	Sorbic acid		110-44-1	C\C=C\C=C\C(O)=O	C6H8O2	112.13		EP9.2,BP2017,USP40-NF35,IP2010,USP42-NF37		Metabolism; Microbiology/virology	Anti-infection; Antibacterial; Antibiotic; Antifungal; Endogenous Metabolite	Anti-infection; Antibiotic; Bacterial; Endogenous Metabolite; Fungal	Sorbic acid is a natural product that inhibits various bacteria, including sporeformers,	Liewen M B , Marth E H . Growth and Inhibition of Microorganisms in the Presence of Sorbic Acid: A Review[J]. Journal of Food Protection, 1985, 48(4):364-375.
T8064	Lactobionic acid		96-82-2	C([C@@H]1[C@@H]([C@@H]([C@H]([C@@H](O1)O[C@H]([C@@H](CO)O)[C@@H]([C@H](C(=O)O)O)O)O)O)O)O	C12H22O12	358.3		EP9.2,BP2017,USP42-NF37		Microbiology/virology	Antibacterial	Bacterial	Lactobionic acid with antioxidant, antimicrobial and moisturizing propertie	Kamila, Goderska. The antioxidant and prebiotic properties of lactobionic acid.[J]. Applied Microbiology & Biotechnology, 2019.
T8062	Cefazedone	Refosporen	56187-47-4	CC1=NN=C(S1)SCC2=C(N3[C@@H]([C@@H](C3=O)NC(=O)CN4C=C(C(=O)C(=C4)Cl)Cl)SC2)C(=O)O	C18H15Cl2N5O5S3	548.4	NMPA		infection	Microbiology/virology	Antibacterial; Antibiotic	Antibiotic; Bacterial	Cefazedone is a semisynthetic first-generation cephalosporin with activity against Gram-positive and Gram-negative bacteria[1].	Dingeldein E . Bactericidal activity of cefazedone[J]. Arzneimittel Forschung, 1979, 29(2a):394-396.
T8126	Cefodizime Sodium		86329-79-5	CC1=C(SC(=N1)SCC2=C(N3[C@@H]([C@@H](C3=O)NC(=O)/C(=N\OC)/C4=CSC(=N4)N)SC2)C(=O)[O-])CC(=O)[O-].[Na+].[Na+]	C20H18N6Na2O7S4	628.6	NMPA	KP Ⅹ,JP17	Digestive system	Microbiology/virology	Antibacterial; Antibiotic	Antibiotic; Bacterial	Cefodizime Sodium is a third generation cephalosporin antibiotic, has broad-spectrum activity	Henwood J M , Monk J P . Enoxacin. A review of its antibacterial activity, pharmacokinetic properties and therapeutic use.[J]. drugs, 1988, 40(3):373-447.
T5029	Oxaceprol	N-Acetyl-L-hydroxyproline	33996-33-7	CC(=O)N1C[C@@H](C[C@H]1C(=O)O)O	C7H11NO4	173.17		Martindale:The Extra Pharmacopoeia		Others	Others	Others	Oxaceprol is an established therapeutic agent for osteoarthritis.	Ionac M , Parnham M J , Plauchithiu M , et al. OXACEPROL, AN ATYPICAL INHIBITOR OF INFLAMMATION AND JOINT DAMAGE[J]. pharmacological research, 1996, 33(6):367-373.
T4S1725	Galanthamine	Galantamine	357-70-0	CN(CC[C@]1([C@H](C2)O3)C=C[C@@H]2O)Cc(cc2)c1c3c2OC	C17H21NO3	287.35	Other countries		Nervous system	Apoptosis; Neuroscience	AChE; Apoptosis	AChE; Apoptosis	Galanthamine is an acetylcholinesterase (AChE)inhibitor(IC50 : 500 nM), can reduce brain damage induced by hypoxia-ischemia.	Luis Marco M D C C . Galanthamine, a Natural Product for the Treatment of Alzheimer's Disease[J]. Recent Patents on Cns Drug Discovery, 2006, 1(1):p.105-111.
T7975	Rhodamine B	Rhodamine B; Basic Violet 1; Brilliant Pink B; Rhodamine O; Tetraethylrhodamine	81-88-9	[Cl-].CCN(CC)c1ccc2c(-c3ccccc3C(O)=O)c3ccc(cc3[o+]c2c1)N(CC)CC	C28H31ClN2O3	479.01		USP42-NF37		Others	Others	Others	Rhodamine B is used as a tracer dye in water to determine the rate and direction of flow and transport.	Tan D , Bai B , Jiang D , et al. Rhodamine B induces long nucleoplasmic bridges and other nuclear anomalies in Allium cepa, root tip cells[J]. Environmental Science & Pollution Research, 2014, 21(5):3363-3370.
T7964	Isomalt	Palatinitol; Palatinit	64519-82-0	OCC(O)[C@@H](O)[C@H](O)[C@H](O)CO[C@H]1O[C@H](CO)[C@@H](O)[C@H](O)[C@H]1O	C12H24O11	344.31		JP17		Metabolism	Dehydrogenase	Lactate Dehydrogenase	Palatinitol is a mixture of 1,6-mannitol glucopyranoside and 1,6-sorbitol glucopyranoside	Siebert G , Grupp U . [Metabolic behavior of disaccharide alcohols and related substances][J]. Deutsche Zahnrztliche Ztschrift, 1977, 32(5 Suppl 1):S36-42.
T7908	DL-Methionine Methylsulfonium Chloride		3493-12-7	[Cl-].C[S+](C)CCC(N)C(O)=O	C6H14ClNO2S	199.7	Swiss		Urinary system	Others	Others	Others	DL-Methionine Methylsulfonium Chloride is a natural product, used in the treatment of peptic ulcers, colitis, and gastritis.	Young L N , Young P K , Jung M H , et al. Inhibitory Effect of Vitamin U (S-Methylmethionine Sulfonium Chloride) on Differentiation in 3T3-L1 Pre-adipocyte Cell Lines[J]. Annals of Dermatology, 2012, 24(1):39-.
T8516	Levomenol	(-)-α-BISABOLOL	23089-26-1	C[C@](CCC=C(C)C)([C@@H]1CC=C(C)CC1)O	C15H26O	222.37	Other countries		Inflammation	Others	Others	Others	Levomenol is a sesquiterpene alcohol that has been found in the essential oils of several aromatic plants, with exerts antioxidant, anti-inflammatory, and anti-apoptotic activities.	Soumaya H , Ines S , López-Arencibia Atteneri, et al. Leishmanicidal activity of α-bisabolol from Tunisian chamomile essential oil[J]. Parasitology Research, 2018.
T7910	4-Methoxybenzaldehyde	Anisic aldehyde; 4-Methoxybenzaldehyde; p-Anisaldehyde; Anisaldehyde; P-Methoxybenzaldehyde; 4-Anisaldehyde	123-11-5	COc1ccc(C=O)cc1	C8H8O2	136.15		USP42-NF37		Metabolism	Endogenous Metabolite	Endogenous Metabolite	Anisic aldehyde is a naturally occurring fragrant phenolic compound , it has significant antifungal activity against Candida, including azole-resistant strains.	Shreaz S , Bhatia R , Khan N , et al. Interesting anticandidal effects of anisic aldehydes on growth and proton-pumping-ATPase-targeted activity[J]. Microbial Pathogenesis, 2011, 51(4):277-284.
T7060	Amantadine	1-Adamantylamine; Amantadine; 1-Adamantanamine; 1-Aminoadamantane	768-94-5	NC12CC3CC(CC(C3)C1)C2	C10H17N	151.25	Other countries	BP2016	Nervous system	Others	Others	Others	1-Adamantylamine is an antiviral, is a weak antagonist of the NMDA-type glutamate receptor, increases dopamine release, and blocks dopamine reuptake.	Lim J K , Wooten D , Siegel R , et al. Amantadine in treatment of chronic hepatitis C virus infection?[J]. Journal of Viral Hepatitis, 2005, 12(5):445-455.
T2S0342	Armillarisin A		53696-74-5	CC(C1=Cc(c(CO)cc(O)c2)c2OC1=O)=O	C12H10O5	234.2	NMPA		Digestive system	Immunology/Inflammation	Interleukin	Interleukin	Armillarisin A enhancing the role of macrophages, inhibiting bacteria growth, improving the protein metabolism, and regulating liver function.	The Effects of Armillarisin A on Serum IL-1β and IL-4 and in Treating Ulcerative Colitis[J]. Cell Biochemistry & Biophysics, 2015, 72(1):103-106.
T4537	Cholic acid sodium	SodiumCholate; Cholic acid sodium	361-09-1	C[C@H](CCC(=O)[O-])[C@H]1CC[C@@H]2[C@@]1([C@H](C[C@H]3[C@H]2[C@@H](C[C@H]4[C@@]3(CC[C@H](C4)O)C)O)O)C.[Na+]	C24H39NaO5	430.6	FDA;NMPA;EMA	BP2017	Digestive system	Metabolism; Microbiology/virology; Proteases/Proteasome	Endogenous Metabolite; HIV Protease	Endogenous Metabolite; HIV	SodiumCholate exhibits a strong spermicidal and antiviral [anti-human immunodeficiency virus (HIV)-1] activity.	Psychoyos A , Creatsas G , Hassan E , et al. Spermicidal and antiviral properties of cholic acid: contraceptive efficacy of a new vaginal sponge (ProtectaidR) containing sodium cholate[J]. Human Reproduction(6):6.
T8130	Ciprofloxacin hydrochloride monohydrate	Ciprofloxacin hydrochloride hydrate; Bay-09867 hydrochloride monohydrate; Ciloxan; Ceprimax; Oftacilox	86393-32-0	Cl.O.O=C(O)c1cn(C2CC2)c2cc(N3CCNCC3)c(F)cc2c1=O	C17H21ClFN3O4	385.8	FDA		Immune system;Infection	Microbiology/virology	Antibacterial; Antibiotic	Antibiotic; Bacterial	Ciprofloxacin hydrochloride hydrate is a fluoroquinolone antibiotic,is an antibiotic used to treat a number of bacterial infections	Hamblin K A , Armstrong S J , Barnes K B , et al. Inhaled Liposomal Ciprofloxacin Protects against a Lethal Infection in a Murine Model of Pneumonic Plague[J]. Frontiers in Microbiology, 2017, 8.
T8135	Minoxidil sulfate	Minoxidil sulphate; U-58838	83701-22-8	N=c1cc(N2CCCCC2)nc(N)n1OS(=O)(=O)O	C9H15N5O4S	289.31	FDA		Others	Membrane transporter/Ion channel	Potassium Channel	Potassium Channel	Minoxidil sulphate is the active metabolite required to exert the vasodilatory and hair growing effects of minoxidil.	Tretinoin enhances minoxidil response in androgenetic alopecia patients by upregulating follicular sulfotransferase enzymes.[J]. Dermatologic Therapy, 2019.
T8132	Iron sucrose	Iron saccharate; Sucroferric oxyhydroxide	8047-67-4	O=C([O-])[C@@H](O)[C@@H](O)[C@H](O)[C@@H](O)C(=O)[O-].O=C([O-])[C@@H](O)[C@@H](O)[C@H](O)[C@@H](O)C(=O)[O-].O=C([O-])[C@@H](O)[C@@H](O)[C@H](O)[C@@H](O)C(=O)[O-].[Fe+3].[Fe+3]	C18H24Fe2O24	736.1	FDA		Urinary system	Immunology/Inflammation; Metabolism; NF-κB	Reactive Oxygen Species	Reactive Oxygen Species	Iron sucrose is treatment of iron deficiency anemia.	Breborowicz M , Polubinska A , Tam P , et al. Effect of iron sucrose on human peritoneal mesothelial cells[J]. European Journal of Clinical Investigation, 2003, 33(12):1038-1044.
T8123	Diazolidinyl urea	Germall II	78491-02-8	O=C1C(N(CO)C(=O)NCO)N(CO)C(=O)N1CO	C8H14N4O7	278.22	United Kingdom		Others	Microbiology/virology	Antibacterial	Bacterial	Diazolidinyl urea is a formaldehyde-releasing preservative used in cosmetics and personal-care products,	Hectorne K J , Fransway A F . Diazolidinyl urea: Incidence of sensitivity, patterns of cross-reactivity and clinical relevance[J]. Contact Dermatitis, 1994, 30(1):16-19.
T8140	Tianeptine	S-1574; JNJ-39823277; TPI-1062; Tianeptine sodium	72797-41-2	CN1c2ccccc2C(NCCCCCCC(=O)O)c2ccc(Cl)cc2S1(=O)=O	C21H25ClN2O4S	437	NMPA		Nervous system	GPCR/G Protein; Neuroscience	5-HT Receptor	5-HT; 5-HT Receptor	Tianeptine is a selective 5-HT uptake facilitator in vitro and in vivo.	Broqua P , Baudrie, Véronique, Chaouloff F . Differential effects of the novel antidepressant tianeptine on l-5-hydroxytryptophan (5-HTP)-elicited corticosterone release and body weight loss[J]. European Neuropsychopharmacology, 1992, 2(2):115-120.
T8125	Quinidine sulfate dihydrate	Quinidine sulfate; Quinidine sulfate dihydrate; Chinidin Sodium; Pitayine Sodium; β-quinine Sodium	6591-63-5	C=CC1CN2CCC1CC2C(O)c1ccnc2ccc(OC)cc12.C=CC1CN2CCC1CC2C(O)c1ccnc2ccc(OC)cc12.O.O.O=S(=O)(O)O	C40H54N4O10S	782.9	FDA		Cardiovascular system	Metabolism	P450	CYP450; Cytochrome P450	Quinidine sulfate dihydrate is a potent and selective cytochrome P450db inhibitor	Tsuruo T , Iida H , Kitatani Y , et al. Effects of Quinidine and Related Compounds on Cytotoxicity and Cellular Accumulation of Vincristine and Adriamycin in Drugresistant Tumor Cells[J]. Cancer Research, 1984, 44(10):4303-4307.
T8124	Sodium benzoate	Benzoic acid sodium salt	532-32-1	O=C([O-])c1ccccc1.[Na+]	C7H5NaO2	144.1	FDA		Others	Others	Others	D-Amino Acid Oxidase	Sodium benzoate is a D-Amino Acid Oxidase Inhibitor.Sodium Benzoate is a Food Preservative.	Malinee P . Effect of Sodium Benzoate Preservative on Micronucleus Induction, Chromosome Break, and Ala40Thr Superoxide Dismutase Gene Mutation in Lymphocytes[J]. Biomed Research International, 2015, 2015:1-5.
T8141	L-Cysteine hydrochloride	L-Cysteine HCl; L-Cysteine hydrochloride	52-89-1	Cl.NC(CS)C(=O)O	C3H8ClNO2S	157.62	NMPA	JP17	Others	Metabolism	Endogenous Metabolite	Endogenous Metabolite	L-Cysteine HCl is a conditionally essential amino acid,L-Cysteine hydrochloride suppresses ghrelin and reduces appetite in rodents and humans	McGavigan AK, et al. L-cysteine suppresses ghrelin and reduces appetite in rodents and humans. Int J Obes (Lond). 2015 Mar;39(3):447-55.
T7853	(+)-Sparteine	Pachycarpine; (+)-Sparteine	492-08-0	C1CCN2C[C@H]3C[C@H](CN4CCCC[C@H]34)[C@@H]2C1	C15H26N2	234.38		Martindale:The Extra Pharmacopoeia		Neuroscience	AChR	AChR; nAChR	Pachycarpine is a natural product extracted from scotch broom, is a sodium channel blocker and a class 1a antiarrhythmic agent	Voitenko S, et al. Effect of (+)-sparteine on nicotinic acetylcholine receptors in the neurons of rat superior cervical ganglion. Mol Pharmacol. 1991 Aug;40(2):180-5.
T8139	Sulfamethoxazole sodium	Ro 4-2130 sodium	4563-84-2	Cc1cc([N-]S(=O)(=O)c2ccc(N)cc2)no1.[Na+]	C10H10N3NaO3S	275.26	FDA		Urinary system;Infection	Microbiology/virology	Antibacterial; Antibiotic	Antibiotic; Bacterial	Sulfamethoxazole sodium is a sulfonamide bacteriostatic antibiotic	Yuriko, Fujiwara, Naoko, et al. Contact urticaria syndrome caused by sulfamethoxazole sodium contained in eye drops[J]. Contact Dermatitis, 2017.
T8143	Bevantolol hydrochloride	NC-1400 hydrochloride	42864-78-8	COc1ccc(CCNCC(O)COc2cccc(C)c2)cc1OC.Cl	C20H28ClNO4	381.9	NMPA		Cardiovascular system	GPCR/G Protein; Neuroscience; Membrane transporter/Ion channel; Metabolism	Adrenergic Receptor; Calcium Channel	Adrenergic Receptor; Calcium Channel; β1-adrenoceptor	Bevantolol hydrochloride is a β1-adrenoceptor antagonist that treatment angina pectoris and hypertension.	Noshiro T , Miura Y , Yoshinaga K , et al. Clinical evaluation of bevantolol hydrochloride in patients with severe hypertension. The Cooperative Study Group on Bevantolol in Japan[J]. International Journal of Clinical Pharmacology & Therapeutics, 1995, 33(4):240-245.
T8134	Cefathiamidine		33075-00-2	CC(=O)OCC1=C(C(=O)O)N2C(=O)C(NC(=O)CSC(=NC(C)C)NC(C)C)C2SC1	C19H28N4O6S2	472.6	NMPA		Immune system;Infection	Microbiology/virology	Antibacterial; Antibiotic	Antibiotic; Bacterial	Cefathiamidine exhibits a wide spectrum of antimicrobial activity against bacteria. Cefathiamidine is used for the treatment of respiratory, liver, five senses, urinary tract infections, endocarditis and sepsis	Chen HY, et al. The killing effects of cefathiamidine or ampicillin alone and in combination with gentamicin against enterococci. J Antimicrob Chemother. 1983 Jul;12(1):19-26.
T8122	Mafenide Acetate		13009-99-9	CC(=O)O.NCc1ccc(S(N)(=O)=O)cc1	C9H14N2O4S	246.29	FDA		Infection	Microbiology/virology	Antibacterial; Antibiotic	Antibiotic; Bacterial	Mafenide Acetate is a sulfonamide-type medication inhibits the enzyme carbonic anhydrase and is used as topical anti-infective, especially in burn therapy.	1. Haynes, B.W., Jr., Mafenide acetate in burn treatment. N Engl J Med, 1971. 284(23): p. 1324._x000D_
T8136	Perospirone hydrochloride	SM-9018 hydrochloride; Perospirone HCl	129273-38-7	Cl.O=C1C2CCCCC2C(=O)N1CCCCN1CCN(c2nsc3ccccc23)CC1	C23H31ClN4O2S	463	NMPA		Nervous system	GPCR/G Protein; Neuroscience	5-HT Receptor; Dopamine Receptor	5-HT; 5-HT Receptor; Dopamine	Perospirone hydrochloride is an atypical antipsychotic agent for the treatment of schizophrenia. It also displays affinity towards 5HT1A receptors as a partial agonist.	Murata Y , Bundo M , Sunaga F , et al. DNA Methylation Profiling in a Neuroblastoma Cell Line Exposed to the Antipsychotic Perospirone[J]. Pharmacopsychiatry, 2018:s-0044-101467.
T8129	Potassium acetate	Diuretic salt; Potassium ethanoate	127-08-2	CC(=O)[O-].[K+]	C2H3KO2	98.14	FDA		Cardiovascular system	Microbiology/virology	Antifungal	Antifungal	Potassium acetate with antibacterial and antifungal properties.	Liato, Viacheslav, Labrie, Steve, A?der, Mohammed. Electro-activation of potassium acetate, potassium citrate and calcium lactate: impact on solution acidity, Redox potential, vibrational properties of Raman spectra and antibacterial activity on E. coli O157:H7 at ambient temperature[J]. Springerplus, 5(1):1760.
T8128	Mosapride	TAK-370; AS-4370	112885-41-3	CCOc1cc(N)c(Cl)cc1C(=O)NCC1CN(Cc2ccc(F)cc2)CCO1	C21H25ClFN3O3	421.9	PMDA		Digestive system	GPCR/G Protein; Neuroscience	5-HT Receptor	5-HT; 5-HT Receptor	Mosapride is a selective 5HT4 agonist	Odaka T, et al. Serotonin 5- HT4 receptor agonist (mosapride citrate). Nihon Rinsho. 2006 Aug;64(8):1491-4.
T8133	SulfadiMethoxine sodium		1037-50-9	COc1cc([N-]S(=O)(=O)c2ccc(N)cc2)nc(OC)n1.[Na+]	C12H13N4NaO4S	332.31	Russia	BP2017,USP39-NF34	infection	Microbiology/virology	Anti-infection; Antibacterial; Antibiotic	Anti-infection; Antibiotic; Bacterial	Sulfadimethoxine is a antimicrobial agent, treatment of respiratory, urinary tract, enteric, and soft tissue infections	Lingfeng D , Shaoju C , Yuqian H , et al. Influence of sulfadimethoxine (SDM) and sulfamethazine (SM) on anammox bioreactors: Performance evaluation and bacterial community characterization[J]. Bioresource Technology, 2018:S0960852418307272-.
T8145	Benzyl cinnamate	Cinnamein; Benzylcinnamoate; Benzyl 3-phenylpropenoate; Cinnamic acid benzyl ester	103-41-3	O=C(/C=C/c1ccccc1)OCc1ccccc1	C16H14O2	238.28		BP2019,EP9.2		Immunology/Inflammation	Immunology/Inflammation related	Immunology/Inflammation related	Benzyl cinnamate is a natural product isolated from various plant species,with anti-inflammatory activity.	Bhatia SP, et al. Fragrance material review on benzyl cinnamate. Food Chem Toxicol. 2007;45 Suppl 1:S40-8. Epub 2007 Sep 14.
T8003	Methotrexate disodium		7413-34-5	CN(Cc1cnc2nc(N)nc(N)c2n1)c1ccc(C(=O)NC(CCC(=O)[O-])C(=O)[O-])cc1.[Na+].[Na+]	C20H20N8Na2O5	498.4	EMA	Martindale:The Extra Pharmacopoeia	Cancer;Inflammation	Antibody-drug Conjugate/ADC Related; Apoptosis; Cell Cycle/Checkpoint; DNA Damage/DNA Repair; Metabolism	ADC Cytotoxin; Antifolate; Apoptosis; Dehydrogenase; DNA/RNA Synthesis	ADC Cytotoxin; Antifolate; Apoptosis; DNA/RNA Synthesis; hDHFR(dihydrofolate reductase)	Methotrexate disodium is an tetrahydrofolate dehydrogenase inhibitor	Yang W , Xia Y , Fang Y , et al. Selective Cell Penetrating Peptide-Functionalized Polymersomes Mediate Efficient and Targeted Delivery of Methotrexate Disodium to Human Lung Cancer In Vivo[J]. Advanced Healthcare Materials, 2017:1701135.
T7938	Quinidine		56-54-2	C=C[C@H]1CN2CC[C@H]1C[C@@H]2[C@@H](O)c1ccnc2ccc(OC)cc12	C20H24N2O2	324.42	FDA	JP17	Cardiovascular system	Microbiology/virology	Parasite	Parasite	Quinidine is a stereoisomer of the antimalarial agent quinine and a class Ia antiarrhythmic agent. for the treatment of abnormal heart rhythms and also malaria.	Salata J J , Wasserstrom J A . Effects of quinidine on action potentials and ionic currents in isolated canine ventricular myocytes[J]. Circulation Research, 1988, 62(2):324-337.
T7943	Fluphenazine decanoate		5002-47-1	CCCCCCCCCC(=O)OCCN1CCN(CCCN2c3ccccc3Sc3ccc(C(F)(F)F)cc32)CC1	C32H44F3N3O2S	591.77	FDA		nervous system	GPCR/G Protein; Neuroscience	Dopamine Receptor	D2; Dopamine	Fluphenazine decanoate is dopamine D2 receptor blocke,and is a long-acting phenothiazine neuroleptic that used to treat schizophrenia.	Wagman J D , Wolfe B A , Schook M W . The effect of fluphenazine decanoate on glucocorticoid production, reproductive cyclicity, and the behavioral stress response in the Persian onager (\r, Equus hemionus onager\r, )[J]. Zoo Biology, 2015, 34(6):525-534.
T7969	Dipyrithione		3696-28-4	[O-][n+]1ccccc1SSc1cccc[n+]1[O-]	C10H8N2O2S2	252.32	Other countries		Metabolism	Others	Others	Others	Dipyrithione appears to have novel cytotoxicity and potent broad-spectrum antitumor activity	Fan Y , Liu C , Huang Y , et al. Dipyrithione induces cell-cycle arrest and apoptosis in four cancer cell lines in vitro and inhibits tumor growth in a mouse model[J]. BMC Pharmacology and Toxicology, 2013, 14(1):1-8.
T7804	Garenoxacin mesylate hydrate	Garenoxacin mesylate [USAN]; BMS284756 (Mesylate hydrate)	223652-90-2	CC1NCc2cc(-c3ccc4c(=O)c(C(=O)O)cn(C5CC5)c4c3OC(F)F)ccc21.CS(=O)(=O)O.O	C23H20F2N2O4.CH4O3S.H2O	540.53	NMPA,PMDA		Immune system	Microbiology/virology	Antibacterial	Bacterial	Garenoxacin mesylate hydrate with potent antimicrobial activity, against common respiratory pathogens, including resistant strains.	Ince, D, Zhang, X, Silver, L. C,et al. Dual Targeting of DNA Gyrase and Topoisomerase IV: Target Interactions of Garenoxacin (BMS-284756, T-3811ME), a New Desfluoroquinolone[J]. Antimicrobial Agents & Chemotherapy, 46(11):3370-3380.
T7940	Milnacipran ((1S-cis) hydrochloride)	Levomilnacipran Hydrochloride	175131-60-9	CCN(CC)C(=O)[C@@]1(c2ccccc2)C[C@H]1CN.Cl	C15H23ClN2O	282.81	FDA		Cancer	Neuroscience	Serotonin Transporter	serotonin; Serotonin Transporter	Milnacipran ((1S-cis) hydrochloride) is a serotonin-norepinephrine reuptake inhibitor (SNRI), treatment of fibromyalgia.	Keks N A , Judy H , Simone K , et al. Milnacipran: serotonin-noradrenaline reuptake inhibitor approved for fibromyalgia may be a useful antidepressant[J]. Australasian Psychiatry, 2018:103985621879487-.
T7939	Fingolimod	FTY-720A; FTY-720	162359-55-9	CCCCCCCCc1ccc(CCC(N)(CO)CO)cc1	C19H33NO2	307.47	FDA	USP42-NF37	Nervous system	Cytoskeletal Signaling; GPCR/G Protein	LPL Receptor; PAK; S1P Receptor	LPL; PAK; S1P	Fingolimod is an antagonist of sphingosine 1-phosphate (S1P) (IC50 of 0.033 nM in K562 and NK cells).	Szepanowski, Fabian, Derksen, Angelika, Steiner, Irina,et al. Fingolimod promotes peripheral nerve regeneration via modulation of lysophospholipid signaling[J]. Journal of Neuroinflammation, 13(1):143.
T7942	Tranylcypromine hemisulfate	Tranylcypromine (hemisulfate); Tranylcypromine Sulfate	13492-01-8	N[C@@H]1C[C@H]1c1ccccc1.N[C@@H]1C[C@H]1c1ccccc1.O=S(=O)(O)O	C18H24N2O4S	364.46	FDA		Nervous system	Chromatin/Epigenetic; Neuroscience	Histone Demethylase; MAO; monoamine oxidase	Histone Demethylase; LSD1; MAO; Monoamine Oxidase	Tranylcypromine is an inhibitor of monoamine oxidase (MAO) and lysine-specific demethylase 1 (LSD1) with a rapid onset of activity.	Takayuki T , Keiichiro I , Hideki H , et al. Potential Neuroprotective Effects of an LSD1 Inhibitor in Retinal Ganglion Cells via p38 MAPK Activity[J]. Investigative Opthalmology & Visual Science, 2016, 57(14):6461-.
T7893	Bepotastine	Bepotastine free base; Bepotastine	125602-71-3	O=C(O)CCCN1CCC(OC(c2ccc(Cl)cc2)c2ccccn2)CC1	C21H25ClN2O3	388.89	Other countries		Inflammation	GPCR/G Protein; Immunology/Inflammation; Neuroscience	Histamine Receptor	Histamine Receptor	Bepotastine free base is a histamine 1 (H1) receptor antagonis.	Kanzaki S , Hashiguchi K , Wakabayashi K I , et al. Histamine antagonist Bepotastine suppresses nasal symptoms caused by Japanese cedar and cypress pollen exposure[J]. journal of drug assessment, 2016, 5(1):15-23.
T7894	Tazarotenic acid	AGN-190299; Tazarotenic acid	118292-41-4	CC1(C)CCSc2ccc(C#Cc3ccc(C(=O)O)cn3)cc21	C19H17NO2S	323.41	Other countries		Inflammation	Others	Others	Others	AGN-190299 is a retinoid prodrug which is converted to its active form	Poeirr Hsyu, Bowen B , Tang-Liu D . Pharmacokinetics of a novel retinoid AGN 190168 and its metabolite AGN 190299 after intravenous administration of AGN 190168 to rats[J]. Biopharmaceutics & Drug Disposition, 1994, 15(5):347-357.
T8148	Mupirocin calcium hydrate	Mupirocin calcium; Mupirocin calcium hydrate	115074-43-6	[Ca+2].O.O.[O-]C(=O)CCCCCCCCOC(=O)\C=C(/C)C[C@@H]2OC[C@H](C[C@@H]1O[C@H]1[C@@H](C)[C@H](C)O)[C@@H](O)[C@H]2O.[O-]C(=O)CCCCCCCCOC(=O)\C=C(/C)C[C@@H]2OC[C@H](C[C@@H]1O[C@H]1[C@@H](C)[C@H](C)O)[C@@H](O)[C@H]2O	C52H86CaO18.2H2O	1075.34	FDA		Immune system;Infection	Microbiology/virology	Antibacterial; Antibiotic	Antibiotic; Bacterial	Mupirocin calcium is an antibiotic produced by Pseudomonas fluorescens, showed a high level of activity against staphylococci and streptococci and against certain gram-negative bacteria	Parenti M A , Hatfield S M , Leyden J J . Mupirocin: A topical antibiotic with a unique structure and mechanism of action[J]. Clinical pharmacy, 1987, 6(10):761-770.
T7941	Imipramine hydrochloride	Imipramine (hydrochloride); Imipramine HCl; G 22355; Tofranil; Melipramine	113-52-0	CN(C)CCCN1c2ccccc2CCc2ccccc21.Cl	C19H25ClN2	316.87	FDA	JP17	Nervous system	Neuroscience	Serotonin Transporter	serotonin; Serotonin Transporter	Imipramine (hydrochloride) is a first generation tricyclic antidepressant that acts primarily as an inhibitor of serotonin and norepinephrine transporters (Kds = 1.4 and 37 nM, respectively).Imipramine hydrochloride is reported to prevent the translocation of aSMase, inhibiting MV and exosomes secretion	Glassman A H . The Clinical Pharmacology of Imipramine[J]. Archives of General Psychiatry, 1973, 28(5):649.
T7903	Saquinavir	Ro 31-8959	127779-20-8	CC(C)(C)NC(=O)C1CC2CCCCC2CN1CC(O)C(Cc1ccccc1)NC(=O)C(CC(N)=O)NC(=O)c1ccc2ccccc2n1	C38H50N6O5	670.84	FDA	USP42-NF37	Immune system	Microbiology/virology; Proteases/Proteasome	HIV Protease; SARS-CoV	HIV; HIV Protease; SARS-CoV	Saquinavir is a potent HIV protease inhibitor, is an antiretroviral drug used together with other medications to treat or prevent HIV/AIDS.	Kupferschmidt H H T , Fattinger K E , Ha H R , et al. Grapefruit juice enhances the bioavailability of HIV protease inhibitor saquinavir in man[J]. British Journal of Clinical Pharmacology, 1998, 45(4):355-359.
T7861	Flumatinib mesylate	HHGV678 mesylate	895519-91-2	CS(=O)(=O)O.Cc1ncc(NC(=O)c2ccc(CN3CCN(C)CC3)c(C(F)(F)F)c2)cc1Nc1nccc(-c2cccnc2)n1	C30H33F3N8O4S	658.69	NMPA		Cancer	Angiogenesis; Cytoskeletal Signaling; Tyrosine Kinase/Adaptors	Bcr-Abl; c-Kit; PDGFR	Bcr-Abl; c-Abl; c-Kit; PDGFR; PDGFRβ	Flumatinib mesylate is a selective inhibitor of c-Abl, PDGFRβ and c-Kit, effectively overcomes drug resistance of certain KIT mutants.	Zhao J , Quan H , Xu Y , et al. Flumatinib, a selective inhibitor of BCR-ABL/PDGFR/KIT, effectively overcomes drug resistance of certain KIT mutants[J]. Cancer Science, 2014, 105(1):117-125.
T7839	Lasofoxifene Tartrate	CP-336156	190791-29-8	O=C(O)C(O)C(O)C(=O)O.Oc1ccc2c(c1)CCC(c1ccccc1)C2c1ccc(OCCN2CCCC2)cc1	C32H37NO8	563.64	EMA		Others	Endocrinology/Hormones	Estrogen Receptor/ERR	Estrogen Receptor/ERR; oestrogen receptor	Lasofoxifene Tartrate is a third-generation, non-steroidal selective estrogen receptor modulator.	Andersson A , Bernardi A I , Stubelius A , et al. Selective oestrogen receptor modulators lasofoxifene and bazedoxifene inhibit joint inflammation and osteoporosis in ovariectomised mice with collagen-induced arthritis[J]. Rheumatology, 2015:kev355.
T7824	Eberconazole Nitrate	Ebernet	130104-32-4	Clc1cc(Cl)c2c(c1)CCc1ccccc1C2n1ccnc1.O=[N+]([O-])O	C18H15Cl2N3O3	392.23	Other countries		Infection	Microbiology/virology	Antifungal	Antifungal	Eberconazole Nitrate is an azole antifungal agent and broad-spectrum imidazole derivative.	Bothiraja C , Gholap A D , Shaikh K S , et al. Investigation of ethyl cellulose microsponge gel for topical delivery of eberconazole nitrate for fungal therapy[J]. Therapeutic delivery, 2014, 5(7):781-794.
T7811	Pilsicainide HCl	SUN 1165	88069-49-2	Cc1cccc(C)c1NC(=O)CC12CCCN1CCC2.Cl	C17H25ClN2O	308.85	PMDA		Cardiovascular system	Membrane transporter/Ion channel	Sodium Channel	Sodium Channel	Pilsicainide HCl is a pure sodium channel blocker	Shiga T , Hashiguchi M , Urae A , et al. Effect of cimetidine and probenecid on pilsicainide renal clearance in humans[J]. Clinical Pharmacology & Therapeutics, 2000, 67.
T7808	Alacepril	Cetapril; DU-1219	74258-86-9	CC(=O)SCC(C)C(=O)N1CCCC1C(=O)NC(Cc1ccccc1)C(=O)O	C20H26N2O5S	406.5	PMDA		Cardiovascular system	Endocrinology/Hormones	RAAS	Angiotensin Receptor	Alacepril is a relatively novel angiotensin-converting enzyme inhibitor, used as an antihypertensive	Kinugawa T , Osaki S , Kato M , et al. Effects of the angiotensin-converting enzyme inhibitor alacepril on exercise capacity and neurohormonal factors in patients with mild-to-moderate heart failure[J]. Clin Exp Pharmacol Physiol, 2002, 29(12):1060-1065.
T7807	Bendazac	Bendazolic acid; AF-983	20187-55-7	O=C(O)COc1nn(Cc2ccccc2)c2ccccc12	C16H14N2O3	282.29	NMPA,PMDA	Martindale:The Extra Pharmacopoeia	Others	Others	Others	Others	Bendazac is an anticataract drug. It may act by preventing protein denaturation.	Marques C , Ramalho J S , Pereira P , et al. Bendazac decreases in vitro glycation of human lens crystallins. Decrease of in vitro protein glycation by bendazac[J]. Documenta Ophthalmologica, 1995, 90(4):395-404.
T7779	Nelfinavir	AG1341	159989-64-7	Cc1c(O)cccc1C(=O)NC(CSc1ccccc1)C(O)CN1CC2CCCCC2CC1C(=O)NC(C)(C)C	C32H45N3O4S	567.78	FDA		Immune system	Microbiology/virology; Proteases/Proteasome	HIV Protease	HIV; HIV Protease; HIV-1	Nelfinavir is an antiretroviral drug used in the treatment of the human immunodeficiency virus (HIV) (Ki=2 nM). Nelfinavir is a broad-spectrum, anticancer agent.	Gills J . Nelfinavir, a lead HIV protease inhibitor, is a broad-spectrum, anticancer agent that induces endoplasmic reticulum stress, autophagy, and apoptosis in vitro and in vivo[J]. Clin Cancer Res, 2007, 13(17):5183.
T7766	Remdesivir	GS-5734	1809249-37-3	CCC(CC)COC(=O)C(C)NP(=O)(OCC1OC(C#N)(c2ccc3c(N)ncnn23)C(O)C1O)Oc1ccccc1	C27H35N6O8P	602.58	FDA		Immune system;Infection	Cell Cycle/Checkpoint; DNA Damage/DNA Repair; Microbiology/virology	DNA/RNA Synthesis; SARS-CoV	DNA/RNA Synthesis; SARS-CoV	Remdesivir is a nucleoside analogue, with effective antiviral activity( EC50s of 74 nM for SARS-CoV and MERS-CoV in HAE cells)	Agostini M L , Andres E L , Sims A C , et al. Coronavirus Susceptibility to the Antiviral Remdesivir (GS-5734) Is Mediated by the Viral Polymerase and the Proofreading Exoribonuclease[J]. Mbio, 2018, 9(2):e00221-18.
T7582	tafamidis meglumine	Fx-1006A	951395-08-7	CNCC(O)C(O)C(O)C(O)CO.O=C(O)c1ccc2nc(-c3cc(Cl)cc(Cl)c3)oc2c1	C21H24Cl2N2O8	503.33	FDA		Nervous system	Others	Others	Others	Tafamidis meglumine is a Potent and Selective Transthyretin Kinetic Stabilizer That Inhibits the Amyloid Cascade	Bulawa C E , Connelly S , Devit M , et al. Tafamidis, a potent and selective transthyretin kinetic stabilizer that inhibits the amyloid cascade[J]. Proceedings of the National Academy of Sciences of the United States of America, 2012, 109(24):p.9629-9634.
T7744	Piperaquine tetraphosphate tetrahydrate		915967-82-7	Clc1ccc2c(N3CCN(CCCN4CCN(c5ccnc6cc(Cl)ccc56)CC4)CC3)ccnc2c1.O.O.O.O.O=P(O)(O)O.O=P(O)(O)O.O=P(O)(O)O.O=P(O)(O)O	C29H32Cl2N6.4H3O4P.4H2O	999.6	EMA		infection	Microbiology/virology	Parasite	Parasite	Piperaquine tetraphosphate tetrahydrate is a potent anti-parasites agent.	Fivelman Q L , Adagu I S , Warhurst D C . Effects of Piperaquine, Chloroquine, and Amodiaquine on Drug Uptake and of These in Combination with Dihydroartemisinin against Drug-Sensitive and -Resistant Plasmodium falciparum Strains[J]. Antimicrobial Agents and Chemotherapy, 2007, 51(6):2265-2267.
T5031	Elagolix sodium	NBI-56418 sodium	832720-36-2	COc1cccc(-c2c(C)n(Cc3c(F)cccc3C(F)(F)F)c(=O)n(CC(NCCCC(=O)[O-])c3ccccc3)c2=O)c1F.[Na+]	C32H29F5N3NaO5	653.57	FDA		Reproductive system	GPCR/G Protein	GNRH Receptor	GnRHR	Elagolix sodium is a GnRH receptor (GnRHR) antagonist ( IC50 and Ki of 0.25 and 3.7 nM, respectively).	Barra F, Scala C, Ferrero S2.Elagolix sodium for the treatment of women with moderate to severe endometriosis-associated pain.Drugs Today (Barc). 2019 Apr;55(4):237-246.
T7405	Piperidolate		82-98-4	CCN1CCCC(OC(=O)C(c2ccccc2)c2ccccc2)C1	C21H25NO2	323.43	PMDA		Others	Neuroscience	AChR	mAChR	Piperidolate inhibits intestinal cramp induced by acetylcholine	Salle J . [Effect of piperidolate hydrochloride on Oddi's sphincter function in the guinea pig][J]. Comptes Rendus Des Séances De La Société De Biologie Et De Ses Filiales, 1958, 152(4):575.
T7531	Pirmenol		68252-19-7	C[C@H]1CCC[C@@H](C)N1CCCC(O)(c1ccccc1)c1ccccn1	C22H30N2O	338.49	PMDA		Cardiovascular system	Others	Others	Others	Pirmenol is a new antiarrhythmic drug	Ciaravino V, Kropko ML, Krishna G,et al.Genotoxicity assessment of pirmenol, a new antiarrhythmic drug.Mutat Res. 1992;280(3):205-14.
T7651	Rose Bengal sodium	Rose Bengal	632-69-9	O=C1OC2(c3cc(I)c([O-])c(I)c3Oc3c2cc(I)c([O-])c3I)c2c(Cl)c(Cl)c(Cl)c(Cl)c21.[Na+].[Na+]	C20H2Cl4I4Na2O5	1017.64	USA;Canada		Others	Membrane transporter/Ion channel; Microbiology/virology	Influenza Virus; Monoamine Transporter	Influenza Virus; vesicular monoamine transporter (VMAT)	Rose Bengal is a potent inhibitor of VGlut and vesicular monoamine transporter (VMAT) (Ki of 19 and 64 nM for VGlut andVMAT, respectively）	Faina Nakonechny , Margarita Barel , Arad David ,et al.Dark Antibacterial Activity of Rose Bengal[J].Int J Mol Sci, 20 (13) 2019 Jun 29
T7650	Resazurin sodium	Resazurin sodium salt; Diazoresorcinol (sodium)	62758-13-8	O=c1ccc2[n+]([O-])c3ccc([O-])cc3oc-2c1.[Na+]	C12H6NNaO4	251.17		USP42-NF37		Microbiology/virology	Antibacterial	Bacterial	Resazurin sodium salt is a blue non-fluorescent dye,is widely used as a metabolic indicator for living cells	Schmitt D M , Connolly K L , Jerse A E , et al. Antibacterial activity of resazurin-based compounds against Neisseria gonorrhoeae in vitro and in vivo[J]. International Journal of Antimicrobial Agents, 2016:S0924857916301650.
T7733	Cefotaxime		63527-52-6	CO/N=C(\C(=O)N[C@@H]1C(=O)N2C(C(=O)O)=C(COC(C)=O)CS[C@H]12)c1csc(N)n1	C16H17N5O7S2	455.46	NMPA		Reproductive system;Respiratory system;Cardiovascular system;Digestive system;Cerebrovascular system;Infection	Microbiology/virology	Anti-infection; Antibacterial; Antibiotic	Anti-infection; Antibiotic; Bacterial	Cefotaxime is an inhibitor of penicillin binding protein.	Brogden R N , Heel R C , Speight T M , et al. Cefuroxime: A Review of its Antibacterial Activity, Pharmacological Properties and Therapeutic Use[J]. Drugs, 1979, 17(4):233-266.
T7603	Pinaverium bromide		53251-94-8	COc1cc(Br)c(C[N+]2(CCOCCC3CCC4CC3C4(C)C)CCOCC2)cc1OC.[Br-]	C26H41Br2NO4	591.42	NMPA,France,Canada,Colombia		Digestive system	Membrane transporter/Ion channel; Metabolism	Calcium Channel	Calcium Channel	Pinaverium bromide is an calcium channel blocker with Antispasmodic and effectively relieves pain, diarrhea and intestinal discomfort.	Action of Pinaverium Bromide, a Calcium-Antagonist, on Gastrointestinal Motility Disorders
T7636	Phenprocoumon		435-97-2	CCC(c1ccccc1)c1c(O)c2ccccc2oc1=O	C18H16O3	280.32	FDA		Cardiovascular system	Metabolism	Vitamin	vitamin K	Phenprocoumon is an antagonist of vitamin K(IC50:1 μM).	Martin, Müller, Fabian, et al. Characteristics, treatment and outcome of bleeding after tooth extraction in patients on DOAC and phenprocoumon compared to non-anticoagulated patients-a retrospective study of emergency department consultations.[J]. Clinical oral investigations, 2018.
T7584	zanubrutinib	BGB-3111	1691249-45-2	C=CC(=O)N1CCC(C2CCNc3c(C(N)=O)c(-c4ccc(Oc5ccccc5)cc4)nn32)CC1	C27H29N5O3	471.55	FDA		Cancer	Angiogenesis; Tyrosine Kinase/Adaptors	BTK	BTK	Zanubrutinib is an inhibitor of Bruton tyrosine kinase (BTK).	Li N , Sun Z , Liu Y , et al. Abstract 2597: BGB-3111 is a novel and highly selective Bruton's tyrosine kinase (BTK) inhibitor[J]. Cancer Research, 2015, 75(15 Supplement):2597-2597.
T7608	Bremelanotide Acetate	PT-141 Acetate	1607799-13-2	CC(=O)O.CCCC[C@H](NC(C)=O)C(=O)N[C@H]1CC(=O)NCCCC[C@@H](C(=O)O)NC(=O)[C@H](Cc2c[nH]c3ccccc23)NC(=O)[C@H](CCCNC(=N)N)NC(=O)[C@@H](Cc2ccccc2)NC(=O)[C@H](Cc2cnc[nH]2)NC1=O	C52H72N14O12	1085.22	FDA		Reproductive system	GPCR/G Protein; Neuroscience	Melanocortin Receptor	Melanocortin Receptor	Bremelanotide is an agonist of melanocortin receptor (MCR) .	Pfaus JG, Shadiack A, Van Soest T,et al.Selective facilitation of sexual solicitation in the female rat by a melanocortin receptor agonist[J].Proc Natl Acad Sci U S A. 2004 Jul 6;101(27)
T7654	L-DOPA methyl ester (hydrochloride)		1421-65-4	COC(=O)[C@@H](N)Cc1ccc(O)c(O)c1.Cl	C10H14ClNO4	247.7	Other countries		Nervous system	GPCR/G Protein; Neuroscience	Dopamine Receptor	D1	L-DOPA methyl ester (LDME) is an agonist of dopamine D1 receptor.	Li R , Liang T , Chen Z , et al. l-Dopa methyl ester attenuates amblyopia-induced neuronal injury in visual cortex of amblyopic cat[J]. Gene, 2013, 527(1):115-122.
T5995	Larotrectinib	LOXO-101; ARRY-470	1223403-58-4	O=C(Nc1cnn2ccc(N3CCC[C@@H]3c3cc(F)ccc3F)nc12)N1CC[C@H](O)C1	C21H22F2N6O2	428.44	FDA		Cancer	Apoptosis; Tyrosine Kinase/Adaptors	Apoptosis; Trk receptor	Apoptosis; Trk; Trk Receptor	Larotrectinib is an orally administered inhibitor of the TRK kinase and is highly selective only for the TRK family of receptors(IC50s = 2-20 nM).	Doebele R C , Davis L E , Vaishnavi A , et al. An oncogenic NTRK fusion in a soft tissue sarcoma patient with response to the tropomyosin-related kinase (TRK) inhibitor LOXO-101[J]. Cancer Discovery, 2015, 5(10):1049-1057.
T7714	Temocapil		111902-57-9	CCOC(=O)C(CCc1ccccc1)NC1CSC(c2cccs2)CN(CC(=O)O)C1=O	C23H28N2O5S2	476.6	PMDA		Cardiovascular system	Proteases/Proteasome	Tyrosinase	tyrosine kinase	Temocapril is an inhibitor of tyrosine kinase.	Yasunari K , Maeda K , Nakamura M , et al. Pharmacological and Clinical Studies with Temocapril, an Angiotensin Converting Enzyme Inhibitor that is Excreted in the Bile[J]. Cardiovascular Therapeutics, 2004, 22(3):189-198.
T7449	o-Phenanthroline monohydrate	1, 10-Phenanthroline monohydrate; Phenanthroline monohydrate	5144-89-8	O.c1cnc2c(c1)ccc1cccnc12	C12H10N2O	198.22		IP2010,USP42-NF37		Proteases/Proteasome	MMP	MMP	1,10-Phenanthroline monohydrate is an inhibitor of metallopeptidases, inhibits zinc-dependent hydrolysis of Fa-Gly-Leu-NH2 by B. subtilis neutral protease and B. thermoproteolyticus thermolysin.	Feder J , Garrett L R , Kochavi D . Studies on the inhibition of neutral proteases by 1,10-phenanthroline[J]. Biochimica et Biophysica Acta, 1971, 235(2):370-377.
T7593	Levomefolate calcium		151533-22-1	CN1c2c(nc(N)[nH]c2=O)NCC1CNc1ccc(C(=O)NC(CCC(=O)[O-])C(=O)[O-])cc1.[Ca+2]	C20H23CaN7O6	497.52	FDA		Cardiovascular system	Cell Cycle/Checkpoint	Antifolate	Antifolate	Levomefolate calcium is an artificial form of folate. It is a coenzymated form of folic acid and a more bioavailable alternative in dietary supplements.	Wiesinger H , Eydeler U , Richard F , et al. Bioequivalence Evaluation of a Folate-Supplemented Oral Contraceptive Containing Ethinylestradiol/Drospirenone/Levomefolate Calcium versus Ethinylestradiol/Drospirenone and Levomefolate Calcium Alone[J]. Clinical Drug Investigation, 2012, 32(10):673-684.
T7477	Antazoline		91-75-8	c1ccc(CN(CC2=NCCN2)c2ccccc2)cc1	C17H19N3	265.35	FDA		Inflammation	Others	Others	Others	Antazoline has antihistamine and anticholinergic effects. It used to treat a variety of arrhythmias.	Michal M Farkowski , Aleksander Maciag,et al.Intravenous antazoline, a first-generation antihistaminic drug with antiarrhythmic properties, is a suitable agent for pharmacological cardioversion of atrial fibrillation induced during pulmonary vein isolation due to the lack of influence on atrio-venous conduction and high clinical effectiveness (AntaEP Study).Br J Clin Pharmacol. 2019 Jul;85(7):155…
T7533	Taurolidine		19388-87-5	O=S1(=O)CCN(CN2CCS(=O)(=O)NC2)CN1	C7H16N4O4S2	284.36	EMA	Martindale:The Extra Pharmacopoeia	infection	Apoptosis; Microbiology/virology	Antibacterial; Antibiotic; Apoptosis	Antibiotic; Apoptosis; Bacterial	Taurolidine is a synthetic taurine analog with antimicrobial and anti-neoplastic actions. It displays broad bactericidal and fungicidal activity.	Mccourt M , Wang J H , Sookhai S , et al. Taurolidine Inhibits Tumor Cell Growth In Vitro and In Vivo[J]. Annals of Surgical Oncology, 2000, 7(9):685-691.
T7469	Alendronic Acid	alendronate	66376-36-1	NCCCC(O)(P(=O)(O)O)P(=O)(O)O	C4H13NO7P2	249.1	FDA		Others	Others	Others	Others	Alendronic acid is a nonhormonal medication used for osteoporosis, osteogenesis imperfecta, and several other bone diseases.	Martín Siguero A, Áreas Del Águila VL, Franco Sereno M T , et al. Efficacy and safety of alendronic acid in the treatment of osteoporosis in children.[J]. Farm Hosp, 2015, 39(6):350-354.
T7560	Pivmecillinam hydrochloride	FL-1039 hydrochloride	32887-03-9	CC(C)(C)C(=O)OCOC(=O)C1N2C(=O)C(N=CN3CCCCCC3)C2SC1(C)C.Cl	C21H34ClN3O5S	476.03	PMDA	JP17	Others	Microbiology/virology	Antibacterial; Antibiotic	Antibiotic; Bacterial	Pivmecillinam hydrochloride is an orally active prodrug of mecillinam, an extended-spectrum penicillin antibiotic,and is active against gram-negative organisms and used as for amdinocillin.	Bleidorn J . Pivmecillinam is more effective than ibuprofen in symptom resolution in women with uncomplicated urinary tract infection: antibiotic treatment for UTI is important[J]. BMJ Evidence-Based Medicine, 2018.
T7550	Barnidipine	Mepirodipine; YM-09730-5(Free base)	104713-75-9	COC(=O)C1=C(C)NC(C)=C(C(=O)O[C@H]2CCN(Cc3ccccc3)C2)[C@H]1c1cccc([N+](=O)[O-])c1	C27H29N3O6	491.54	NMPA		Cardiovascular system	Membrane transporter/Ion channel; Metabolism	Calcium Channel	Calcium Channel	Barnidipine is a calcium channel blocker.	Barnidipine ameliorates the vascular and renal injury in l-NAME-induced hypertensive rats[J]. European Journal of Pharmacology, 2015, 764:433-442.
T7459	Abametapir	HA-44; BRN 0123183	1762-34-1	Cc1ccc(-c2ccc(C)cn2)nc1	C12H12N2	184.24	FDA		Others	Microbiology/virology; Proteases/Proteasome	MMP; Parasite	metalloproteinase; MMP; Parasite	Abametapir, a metalloproteinase inhibitor, is able to target metalloproteinases critical to egg hatching and louse development.	Bowles VM, Hanegraaf S, Ahveninen T.et al.Effect of a New Head Lice Treatment, Abametapir Lotion, 0.74%, on Louse Eggs: A Randomized, Double-Blind Study.Glob Pediatr Health. 2019 Feb 22.
T7569	Clebopride malate		57645-91-7	COc1cc(N)c(Cl)cc1C(=O)NC1CCN(Cc2ccccc2)CC1.O=C(O)CC(O)C(=O)O	C24H30ClN3O7	507.96	NMPA	JP17	Digestive system	GPCR/G Protein; Neuroscience	Dopamine Receptor	Dopamine	Clebopride malate is a dopamine antagonist drug Used to treat functional gastrointestinal disorders such as nausea or vomiting.	Bleiberg H , Piccart M , Lips S , et al. A phase I trial of a new antiemetic drug--clebopride malate--in cisplatin-treated patients[J]. Annals of Oncology Official Journal of the European Society for Medical Oncology, 1992, 3(2):141.
T7589	Afamelanotide Acetate		1566590-77-9	CC(O)=O.CCCC[C@H](NC(=O)[C@H](CO)NC(=O)[C@H](CC1=CC=C(O)C=C1)NC(=O)[C@H](CO)NC(C)=O)C(=O)N[C@@H](CCC(O)=O)C(=O)N[C@@H](CC1=CNC=N1)C(=O)N[C@H](CC1=CC=CC=C1)C(=O)N[C@@H](CCCNC(N)=N)C(=O)N[C@@H](CC1=CNC2=CC=CC=C12)C(=O)NCC(=O)N[C@@H](CCCCN)C(=O)N1CCC[C@H]1C(=O)N[C@@H](C(C)C)C(N)=O	C80H115N21O21	1706.9	FDA		Chromosomal disease	GPCR/G Protein; Neuroscience	Melanocortin Receptor	melanocortin-1 receptor	Afamelanotide is a synthetic α-melanocyte stimulating hormone analogue and first-in-class melanocortin-1 receptor agonist, used to for Erythropoietic Protoporphyria.	Langendonk J G , Balwani M , Anderson K E , et al. Afamelanotide for Erythropoietic Protoporphyria[J]. New England Journal of Medicine, 2015, 373(1):48-59.
T7417	Avatrombopag	AKR-501; E5501; YM477	570406-98-3	O=C(Nc1nc(-c2cc(Cl)cs2)c(N2CCN(C3CCCCC3)CC2)s1)c1cnc(N2CCC(C(=O)O)CC2)c(Cl)c1	C29H34Cl2N6O3S2	649.65	FDA		Cardiovascular system	Immunology/Inflammation; Proteases/Proteasome	Thrombin; Thrombopoietin Receptor	Thrombopoietin Receptor; TPO	Avatrombopag is a new oral thrombopoietin (TPO) receptor agonist, activating TPO receptor and increasing megakaryocytic proliferation/differentiation and platelet production.	Xu H, Cai R.Avatrombopag for the treatment of thrombocytopenia in patients with chronic liver disease.Expert Rev Clin Pharmacol. 2019 Sep;12(9):859-865
T7551	Belotecan hydrochloride	CKD-602	213819-48-8	CCC1(O)C(=O)OCc2c1cc1n(c2=O)Cc2c-1nc1ccccc1c2CCNC(C)C.Cl	C25H28ClN3O4	469.96	KFDA		Cancer	DNA Damage/DNA Repair	Topoisomerase	Topo I; Topoisomerase	Belotecan hydrochloride is a synthetic water-soluble camptothecin derivative and topoisomerase I inhibitor with potential antitumor activity	Kim Y K , Koo N Y , Yun P Y . Anticancer effects of CKD-602 (Camtobell (R)) via G2/M phase arrest in oral squamous cell carcinoma cell lines[J]. Oncology letters, 2015, 9(1):136-142.
T7555	Piperidolate hydrochloride		129-77-1	CCN1CCCC(OC(=O)C(c2ccccc2)c2ccccc2)C1.Cl	C21H26ClNO2	359.89	PMDA		Others	Neuroscience	AChR	mAChR; muscarinic receptor	Piperidolate hydrochloride is an antimuscarinic, could restrain the abnormal activity caused by acetylcholine. inhibits intestinal cramp induced by acetylcholine (rats and dogs).	Salle J . [Effect of piperidolate hydrochloride on Oddi's sphincter function in the guinea pig][J]. Comptes Rendus Des Séances De La Société De Biologie Et De Ses Filiales, 1958, 152(4):575.
T7581	voxelotor	GBT 440	1446321-46-5	CC(C)n1nccc1-c1ncccc1COc1cccc(O)c1C=O	C19H19N3O3	337.37	FDA		Cardiovascular system	Others	Others	sickle hemoglobin (HbS)	voxelotor is an inhibitor of sickle hemoglobin (HbS)	Impact of voxelotor (GBT440) on unconjugated bilirubin and jaundice in sickle cell disease[J]. Hematology Reports, 2018, 10(2).
T7412	Tandospirone citrate	SM-3997 citrate	112457-95-1	O=C(O)CC(O)(CC(=O)O)C(=O)O.O=C1C2C3CCC(C3)C2C(=O)N1CCCCN1CCN(c2ncccn2)CC1	C27H37N5O9	575.61	NMPA		Nervous system	GPCR/G Protein; Neuroscience	5-HT Receptor	5-HT; 5-HT Receptor	Tandospirone citrate is a potent and selective 5-HT1A receptor partial agonist (Ki : 27 nM)	Miwa H , Nagahara A , Tominaga K , et al. Efficacy of the 5-HT1A Agonist Tandospirone Citrate in Improving Symptoms of Patients With Functional Dyspepsia: A Randomized Controlled Trial[J]. The American Journal of Gastroenterology, 2009, 104(11):2779-2787.
T7423	Diquafosol tetrasodium	INS365	211427-08-6	O=c1ccn(C2OC(COP(=O)([O-])OP(=O)([O-])OP(=O)([O-])OP(=O)([O-])OCC3OC(n4ccc(=O)[nH]c4=O)C(O)C3O)C(O)C2O)c(=O)[nH]1.[Na+].[Na+].[Na+].[Na+]	C18H22N4Na4O23P4	878.23	Other countries		Urinary system;Infection	Neuroscience	P2 Receptor	P2Y; P2Y2 receptor	Diquafosol Tetrasodium is a P2Y2 receptor agonist that stimulates the secretion of mucins from ocular tissues Diquafosol tetrasodium improves tear film stability and visual function, as a topical treatment of dry eye disease.	Lee J H , Lee J S , Kim S , et al. Comparison of cytotoxicities and wound healing effects of diquafosol tetrasodium and hyaluronic acid on Human corneal epithelial cells[J]. Korean Journal of Physiology and Pharmacology, 2017, 21(2):189.
T7537	Norgestimate		35189-28-7	C#C[C@]1(OC(C)=O)CC[C@H]2[C@@H]3CCC4=C/C(=N/O)CC[C@@H]4[C@H]3CC[C@@]21CC	C23H31NO3	369.5	FDA		Reproductive system	Others	progesterone receptor	Progesterone Receptor	Norgestimate is an acetylated progestinused in combination with ethinyl estradiol as an oral contraceptive.	Yoshii Y , Okuda K I , Yamada S , et al. Norgestimate inhibits staphylococcal biofilm formation and resensitizes methicillin-resistant Staphylococcus aureus to β-lactam antibiotics[J]. npj Biofilms and Microbiomes, 2017, 3(1):18.
T7556	Fadrozole hydrochloride	CGS 16949A	102676-31-3	Cl.N#Cc1ccc(C2CCCc3cncn32)cc1	C14H14ClN3	259.73	PMDA		Cancer	Endocrinology/Hormones	Aromatase	Aromatase	Fadrozole hydrochloride is a model aromatase inhibitor that has been shown to suppress estrogen production in the ovaries of fish.	Tekmal R R , Durgam V R . A novel in vitro and in vivo breast cancer model for testing inhibitors of estrogen biosynthesis and its action using mammary tumor cells with an activated int-5/aromatase gene[J]. Cancer Letters, 1997, 118(1):0-28.
T7369	Gemigliptin	LC15-0444	911637-19-9	N[C@H](CN1CC(F)(F)CCC1=O)CC(=O)N1CCc2c(C1)nc(nc2C(F)(F)F)C(F)(F)F	C18H19F8N5O2	489.36	India, Columbia, Costa Rica, Panama, Ecuador		Metabolism	Proteases/Proteasome; Ubiquitination	DPP-4; Proteasome	Dipeptidyl Peptidase; DPP-4	Gemigliptin is a potent dipeptidyl peptidase-4 (DPP-4) inhibitor(KD : 7.25 nM.)	Choi S Y , Ryu H M , Oh E J , et al. Dipeptidyl peptidase-4 inhibitor gemigliptin protects against vascular calcification in an experimental chronic kidney disease and vascular smooth muscle cells[J]. PLoS ONE, 2017, 12(7):e0180393.
T7394	Toceranib Phosphate	PHA 291639 phosphate ; SU11654 phosphate	874819-74-6	OP(O)(O)=O.Cc1[nH]c(\C=C2/C(=O)Nc3ccc(F)cc23)c(C)c1C(=O)NCCN1CCCC1	C22H28FN4O6P	494.45	EMA		Others	Angiogenesis; Tyrosine Kinase/Adaptors; Proteases/Proteasome	c-Kit; PDGFR; Tyrosinase; VEGFR	c-Kit; PDGFR; tyrosine kinase; VEGFR	Toceranib phosphate, is a selective inhibitor of the tyrosine kinase activity of several members of the split kinase RTK family, including Flk-1/KDR, PDGFR	Tjostheim S S , Stepien R L , Markovic L E , et al. Effects of Toceranib Phosphate on Systolic Blood Pressure and Proteinuria in Dogs[J]. Journal of Veterinary Internal Medicine, 2016, 30(4):951-957.
T7392	Revefenacin	TD-4208; GSK1160724	864750-70-9	CN(CCN1CCC(CC1)OC(=O)Nc1ccccc1-c1ccccc1)C(=O)c1ccc(CN2CCC(CC2)C(N)=O)cc1	C35H43N5O4	597.75	FDA		Respiratory system	Neuroscience	AChR	mAChR	Revefenacin is a mAChR antagonist has a high affinity on M3 receptor( Ki : 0.18 nM),and potentially useful for the treatment of respiratory disease.	Pulido-Rios MT, McNamara A, Obedencio GP,et al.In vivo pharmacological characterization of TD-4208, a novel lung-selective inhaled muscarinic antagonist with sustained bronchoprotective effect in experimental animal models[J].J Pharmacol Exp Ther. 2013 Aug;346(2):241-50.
T7313	Enclomiphene citrate	(E)-Clomiphene citrate; trans-Clomiphene citrate; Enclomifene citrate	7599-79-3	OC(=O)CC(O)(CC(O)=O)C(O)=O.CCN(CC)CCOc1ccc(cc1)C(\c1ccccc1)=C(\Cl)c1ccccc1	C32H36ClNO8	598.08	EMA		Others	Endocrinology/Hormones	Estrogen Receptor/ERR	Estrogen Receptor/ERR; oestrogen receptor	Enclomiphene citrate is a non-steroidal estrogen receptor antagonist,with antioestrogenic property	Kim E D , Mccullough A , Kaminetsky J . Oral enclomiphene citrate raises testosterone and preserves sperm counts in obese hypogonadal men, unlike topical testosterone: restoration instead of replacement[J]. BJU International, 2016, 117(4):677-685.
T7363	Ibuprofen Piconol	U75630	64622-45-3	CC(C)Cc1ccc(cc1)C(C)C(=O)OCc1ccccn1	C19H23NO2	297.39	PMDA	JP17	Others	Others	Others	Others	Ibuprofen piconol is a non-steroidal, anti-inflammatory (NSAID) agent for the topical relief of primary thermal burns and sunburns.Ibuprofen piconol is a Pyridyl ester of ibuprofen.	Christensen J M , Stalker D . Ibuprofen piconol hydrolysis in vitro in plasma, whole blood, and serum using different anticoagulants[J]. 1991, 80(1):29-31.
T7386	Bretylium tosylate		61-75-6	CC1=CC=C(C=C1)S([O-])(=O)=O.CC[N+](C)(C)CC1=CC=CC=C1Br	C18H24BrNO3S	414.36	PMDA		Others	Others	Others	Others	Bretylium tosylate is an inhibitor of the presynaptic release of vasoconstrictor neurotransmitters, a available antiarrhythmic drug for ventricular arrhythmias.	Dhurandhar R W , Teasdale S J , Mahon W A . Bretylium Tosylate in the Management of Refractory Ventricular Fibrillation[J]. Canadian Medical Association journal, 1971, 105(2):161-5 passim.
T7421	Melperone		3575-80-2	CC1CCN(CCCC(=O)c2ccc(F)cc2)CC1	C16H22FNO	263.35	EMA		nervous system	Others	Others	Others	Melperone, a butyrophenone tranquillizer, caused bradycardia in vivo and in vitro.	Millar J S , Vaughan Williams E M . Differential actions on rabbit nodal, atrial, Purkinje cell and ventricular potentials of melperone, a bradycardic agent delaying repolarization: effects of hypoxia.[J]. British Journal of Pharmacology, 2012, 75(1):109-121.
T7333	Pyrvinium pamoate	Pyrvinium embonate	3546-41-6	CN(C)c1ccc2[n+](C)c(\C=C\c3cc(C)n(c3C)-c3ccccc3)ccc2c1.CN(C)c1ccc2[n+](C)c(\C=C\c3cc(C)n(c3C)-c3ccccc3)ccc2c1.Oc1c(cc2ccccc2c1Cc1c(O)c(cc2ccccc12)C([O-])=O)C([O-])=O	C26H28N3 . 1/2 C23H14O6	575.7	FDA		Infection	Cytoskeletal Signaling; Stem Cells	Wnt/beta-catenin	Wnt	Pyrvinium pamoate is an old anthelminthic medicine for the treatment of enterobiasis , which re-attracts attention as an anti-cancer drug due to its inhibition of Wnt/β-catenin pathway in some types of cancer.	Zheng L , Liu Y , Pan J . Inhibitory effect of pyrvinium pamoate on uveal melanoma cells involves blocking of Wnt/β-catenin pathway[J]. 生物化学与生物物理学报:英文版, 2017(49):898.
T7176	Pitolisant hydrochloride	Ciproxidine; BF 2649	903576-44-3	Cl.Clc1ccc(CCCOCCCN2CCCCC2)cc1	C17H27Cl2NO	332.31	FDA		Others	GPCR/G Protein; Immunology/Inflammation; Neuroscience	Histamine Receptor	H3 receptor; Histamine Receptor	Pitolisant hydrochloride is a potent and selective inverse agonist of the histamine H3 receptor(Ki : 0.16 nM).	Kotańska Magdalena, Kuder K J , Szczepańska Katarzyna, et al. The histamine H3 receptor inverse agonist pitolisant reduces body weight in obese mice[J]. Naunyn-Schmiedeberg's Archives of Pharmacology, 2018.
T7225	AnaMorelin hydrochloride	RC-1291 hydrochloride; ONO-7643 hydrochloride	861998-00-7	Cl.CN(C)N(C)C(=O)[C@@]1(Cc2ccccc2)CCCN(C1)C(=O)[C@@H](Cc1c[nH]c2ccccc12)NC(=O)C(C)(C)N	C31H43ClN6O3	583.16	PMDA		Nervous system	GPCR/G Protein	GHSR	ghrelin receptor; GHS-R	Anamorelin hydrochloride is a novel ghrelin receptor agonist(EC50 : 0.74 nM, in the FLIPR assay).	Pietra C , Takeda Y , Tazawa-Ogata N , et al. Anamorelin HCI (ONO-7643), a novel ghrelin receptor agonist, for the treatment of cancer anorexia-cachexia syndrome: preclinical profile[J]. Journal of Cachexia, Sarcopenia and Muscle, 2014, 5(4).
T7117	Sapropterin dihydrochloride	Sapropterin Hydrochloride; 6R-BH4 dihydrochloride; 6R-Tetrahydro-L-biopterin dihydrochloride	69056-38-8	Cl.Cl.[H][C@@]1(CNc2nc(N)[nH]c(=O)c2N1)[C@@H](O)[C@H](C)O	C9H17Cl2N5O3	314.17	FDA		Others	Metabolism	Hydroxylase	phenylalanine hydroxylas	Sapropterin dihydrochloride is phenylalanine hydroxylase agonist that is approved for the treatment of BH4 responsive PKU.	Vanoxerine, a New Drug for Terminating Atrial Fibrillation and Flutter[J]. J Cardiovasc Electrophysiol, 2010, 21(3):311-319.
T7164	Levalbuterol tartrate	Levosalbutamol tartrate	661464-94-4	O[C@H]([C@@H](O)C(O)=O)C(O)=O.CC(C)(C)NC[C@H](O)c1ccc(O)c(CO)c1.CC(C)(C)NC[C@H](O)c1ccc(O)c(CO)c1	C17H27NO9	389.39	PMDA		Inflammation;Nervous system	GPCR/G Protein; Neuroscience	Adrenergic Receptor	Adrenergic Receptor; β2-adrenergic receptor	Levosalbutamol tartrate is the β2-adrenergic receptor agonist,and is used to treatment of asthma.	NA
T7213	Demecarium bromide	BC-48	56-94-0	[Br-].[Br-].CN(CCCCCCCCCCN(C)C(=O)Oc1cccc(c1)[N+](C)(C)C)C(=O)Oc1cccc(c1)[N+](C)(C)C	C32H52Br2N4O4	716.59	FDA	USP42-NF37	Others	Neuroscience	AChE	AChE; cholinesterase	Demecarium bromide is a potent cholinesterase inhibitor,and is treatment glaucoma agent.	Terner I S , Linn J G , Goldstrohm R . Clinical Experiences with Demecarium Bromide (BC-48) in the Treatment of Glaucoma*[J]. American Journal of Ophthalmology, 1961, 52(4):553-560.
T7219	Flecainide acetate	Flecainide (acetate); R-818	54143-56-5	CC(O)=O.FC(F)(F)COc1ccc(OCC(F)(F)F)c(c1)C(=O)NCC1CCCCN1	C19H24F6N2O5	474.39	FDA		Cardiovascular system	Membrane transporter/Ion channel	Sodium Channel	Nav1.5 channel; Sodium Channel	Flecainide (acetate) is a class Ic antiarrhythmic agent used to prevent and treat tachyarrhythmias (abnormal fast rhythms of the heart).	Kohli, Vikas. Oral flecainide is effective in management of refractory tachycardia in infants[J]. Indian Heart Journal, 2013, 65(2):168-171.
T7094	Levomefolic Acid	5-MTHF	31690-09-2	CN1[C@@H](CNc2ccc(cc2)C(=O)N[C@@H](CCC(O)=O)C(O)=O)CNc2nc(N)[nH]c(=O)c12	C20H25N7O6	459.46	FDA		Cardiovascular system	Immunology/Inflammation; Metabolism; NF-κB	Endogenous Metabolite; Reactive Oxygen Species	Endogenous Metabolite; Human Endogenous Metabolite; Reactive Oxygen Species	Levomefolinic acid is a natural, active form of folic acid used at the cellular level for DNA reproduction, the cysteine cycle and the regulation of homocysteine among other functions. Levomefolinic acid is used as a treatment and to prevent Folate Deficiency	Thermal oxidation studies on reduced folate, L-5-methyltetrahydrofolic acid (L-5-MTHF) and strategies for stabilization using food matrices.
T7160	Lofexidine		31036-80-3	CC(Oc1c(Cl)cccc1Cl)C1=NCCN1	C11H12Cl2N2O	259.13	FDA		Nervous system	GPCR/G Protein; Neuroscience	Adrenergic Receptor	Adrenergic Receptor; α2 receptor	Lofexidine is a selective α2-receptor agonist, Lofexidine reduces narcotic withdrawal symptoms.	Gorodetzky CW, Walsh SL, Martin PR,et al.A phase III, randomized, multi-center, double blind, placebo controlled study of safety and efficacy of lofexidine for relief of symptoms in individuals undergoing inpatient opioid withdrawal[J].Drug Alcohol Depend. 2017 Jul 1;176:79-88.
T7175	Alflutinib mesylate	AST2818 mesylate; Alflutinib mesylate	2130958-55-1	CS(O)(=O)=O.CN(C)CCN(C)c1nc(OCC(F)(F)F)c(Nc2nccc(n2)-c2cn(C)c3ccccc23)cc1NC(=O)C=C	C29H35F3N8O5S	664.7	NMPA		Cancer	Angiogenesis; JAK/STAT signaling; Tyrosine Kinase/Adaptors	EGFR	EGFR	AST2818 mesylate,is an irreversible tyrosine kinase inhibitor that selectively inhibits EGFR mutations, especially T790M.	Liu X, Li W, Zhang Y,et al.Simultaneous determination of alflutinib and its active metabolite in human plasma using liquid chromatography-tandem mass spectrometry[J].J Pharm Biomed Anal. 2019 Nov 30;176:112735.
T7148	JOSAMYCIN	EN-141	16846-24-5	CO[C@H]1[C@@H](CC(=O)O[C@H](C)C\C=C\C=C\[C@H](O)[C@H](C)C[C@H](CC=O)[C@@H]1O[C@@H]1O[C@H](C)[C@@H](O[C@H]2C[C@@](C)(O)[C@@H](OC(=O)CC(C)C)[C@H](C)O2)[C@@H]([C@H]1O)N(C)C)OC(C)=O	C42H69NO15	827.99	PMDA	JP17	Respiratory system;Infection	Microbiology/virology	Antibacterial; Antibiotic	Antibiotic; Bacterial	JOSAMYCIN is a macrolide antibiotic exhibiting antimicrobial activity. The dissociation constant Kd from ribosome for Josamycin is 5.5 nM.	Eun-Young C , So-Hui C , Jin-Yi H , et al. Josamycin suppresses, Prevotella intermedia, lipopolysaccharide-induced production of nitric oxide and interleukin-1β in murine macrophages[J]. Biomedicine & Pharmacotherapy, 2018, 105:498-505.
T7212	Delavirdine mesylate	Delavirdine (mesylate); U 90152 (mesylate); BHAP-U 90152 (mesylate)	147221-93-0	CS(O)(=O)=O.CC(C)Nc1cccnc1N1CCN(CC1)C(=O)c1cc2cc(NS(C)(=O)=O)ccc2[nH]1	C23H32N6O6S2	552.67	FDA		Immune system;Infection	Microbiology/virology; Proteases/Proteasome	HIV Protease; Reverse Transcriptase	HIV; HIV-1; Reverse Transcriptase	Delavirdine (mesylate) is a non-nucleoside reverse transcriptase inhibitor (NNRTI).	Costa S , Machado M , Cavadas, Cláudia, et al. Antileishmanial activity of antiretroviral drugs combined with miltefosine[J]. Parasitology Research, 2016, 115(10):3881-3887.
T7146	Piperazine adipate		142-88-1	C1CNCCN1.OC(=O)CCCCC(O)=O	C10H20N2O4	232.28		JP17		Microbiology/virology	Parasite	Parasite	Piperazine adipate is a potent broad spectrum anthelmintic.	Sharma R K , Singh K , Saxena K K . Effect of parbendazole and piperazine adipate on the activity of some enzymes of Ascaridia galli and Heterakis gallinae[J]. Veterinary Parasitology, 1987, 24(3-4):211-220.
T7282	Tenofovir alafenamide hemifumarate	Tenofovir alafenamide fumarate; Tenofovir alafenamide hemifumarate; GS-7340 (hemifumarate)	1392275-56-7	OC(/C=C/C(O)=O)=O.CC(C)OC([C@H](C)NP(CO[C@H](C)CN1C2=NC=NC(N)=C2N=C1)(OC3=CC=CC=C3)=O)=O.CC(C)OC([C@H](C)NP(CO[C@H](C)CN4C5=NC=NC(N)=C5N=C4)(OC6=CC=CC=C6)=O)=O	C21H29N6O5P·1/2C4H4O4	534.51	FDA		Infection	Microbiology/virology; Proteases/Proteasome	HIV Protease; Reverse Transcriptase	HIV; HIV-1; Reverse Transcriptase	Tenofovir alafenamide fumarate (TAF) is an oral phosphonoamidate prodrug of the HIV reverse transcriptase nucleotide inhibitor tenofovir (TFV)	Birkus G, Bam RA, Willkom M,et al.Intracellular Activation of Tenofovir Alafenamide and the Effect of Viral and Host Protease Inhibitors[J].Antimicrob Agents Chemother. 2015 Oct 26;60(1):316-22.
T7158	Ombitasvir	ABT-267	1258226-87-7	COC(=O)N[C@@H](C(C)C)C(=O)N1CCC[C@H]1C(=O)Nc1ccc(cc1)[C@@H]1CC[C@H](N1c1ccc(cc1)C(C)(C)C)c1ccc(NC(=O)[C@@H]2CCCN2C(=O)[C@@H](NC(=O)OC)C(C)C)cc1	C50H67N7O8	894.11	FDA		Immune system;Infection	Microbiology/virology; Proteases/Proteasome	HCV Protease	HCV; HCV NS5A	Ombitasvir is an orally bioavailable and potent inhibitor of the hepatitis C virus (HCV) non-structural protein 5A (NS5A).with EC50s of 0.82 to 19.3 pM against HCV genotypes 1 to 5, and 366 pM against genotype 6a	Krishnan P, Beyer J, Mistry N,et al.in vitro and in vivo antiviral activity and resistance profile of ombitasvir, an inhibitor of hepatitis c virus ns5a[J].Antimicrob Agents Chemother. 2015 Feb;59(2):979-87.
T7216	Mirogabalin	DS5565	1138245-13-2	[H][C@@]12C[C@](CN)(CC(O)=O)[C@]1([H])C=C(CC)C2	C12H19NO2	209.28	PMDA		Nervous system	Membrane transporter/Ion channel; Metabolism	Calcium Channel	Calcium Channel; α2δ calcium channels	Mirogabalin is a calcium channel blocker with analgesic effects.	Vinik A , Rosenstock J , Sharma U , et al. Efficacy and Safety of Mirogabalin (DS-5565) for the Treatment of Diabetic Peripheral Neuropathic Pain: A Randomized, Double-Blind, Placebo- and Active Comparator-Controlled, Adaptive Proof-of-Concept Phase 2 Study[J]. Diabetes Care, 2014, 37(12):3253-61.
T7147	Valbenazine	NBI-98854	1025504-45-3	[H][C@]12C[C@@H](OC(=O)[C@@H](N)C(C)C)[C@H](CC(C)C)CN1CCc1cc(OC)c(OC)cc21	C24H38N2O4	418.57	FDA		Nervous system	Membrane transporter/Ion channel	Monoamine Transporter	Monoamine Transporter; VMAT2	Valbenazine, a highly selective vesicular monoamine transporter 2(VMAT2) inhibitor, is approved for the treatment of tardive dyskinesia.	Josiassen R C , Kane J M , Liang G S , et al. Long-Term Safety and Tolerability of Valbenazine (NBI-98854) in Subjects with Tardive Dyskinesia and a Diagnosis of Schizophrenia or Mood Disorder[J]. Psychopharmacology bulletin, 2017, 47(3):61-68.
T7197	Fadrozole		102676-47-1	N#Cc1ccc(cc1)C1CCCc2cncn12	C14H13N3	223.27	Japan	Martindale the Extra Pharmacopoei	Cancer	Endocrinology/Hormones	Aromatase	Aromatase	Fadrozole is a nonsteroidal aromatase inhibitor with potential antineoplastic activity(IC50 : 6.4 nM)	Schroeder A L , Ankley G T , Habib T , et al. Rapid Effects of the Aromatase Inhibitor Fadrozole on Steroid Production and Gene Expression in the Ovary of Female Fathead Minnows ( Pimephales promelas )[J]. General and Comparative Endocrinology, 2017:S0016648017301521.
T7106	Menaquinone-4	Vitamin K2; Menaquinone K4	863-61-6	CC(C)=CCC\C(C)=C\CC\C(C)=C\CC\C(C)=C\CC1=C(C)C(=O)c2ccccc2C1=O	C31H40O2	444.65	NMPA	JP17,USP42-NF37	Others	Metabolism	Endogenous Metabolite	Endogenous Metabolite	Menaquinone-4 is a vitamin K compound used as a hemostatic agent, and also as adjunctive therapy for the pain of osteoporosis.	Kim M , Na W , Sohn C . Vitamin K1 (phylloquinone) and K2 (menaquinone-4) supplementation improves bone formation in a high-fat diet-induced obese mice[J]. Journal of Clinical Biochemistry and Nutrition, 2013, 53(2):108-113.
T5985	Glycolic acid		79-14-1	OCC(O)=O	C2H4O3	76.05	USA	USP42-NF37	Others	Metabolism; Proteases/Proteasome	Endogenous Metabolite; Tyrosinase	Endogenous Metabolite; Tyrosinase	Glycolic acid is an inhibitor of tyrosinase, suppressing melanin formation,and used in skincare products	Tang S C , Liao P Y , Hung S J , et al. Topical application of glycolic acid suppresses the UVB induced IL-6, IL-8, MCP-1 and COX-2 inflammation by modulating NF-κB signaling pathway in keratinocytes and mice skin[J]. Journal of Dermatological Science, 2017:S092318111630915X.
T5984	Indole-3-carboxylic acid	3-Indoleformic acid	771-50-6	OC(=O)c1c[nH]c2ccccc12	C9H7NO2	161.16		USP42-NF37		Metabolism	Endogenous Metabolite	Endogenous Metabolite; Human Endogenous Metabolite	Indole-3-carboxylic acid is a normal urinary indolic tryptophan metabolite .	Hartmann F , Freiberg E , Ruge W . [Indolepatterns in the urine of liver patients].[J]. Klin Wochenschr, 1962, 40:721-729.
T5983	o-Phenanthroline	1,10-Phenanthroline	66-71-7	c1cnc2c(c1)ccc1cccnc21	C12H8N2	180.21		IP2010,USP42-NF37		Proteases/Proteasome	MMP	MMP	O-Phenanthroline (1,10-Phenanthroline), a metal chelator, prevents the induction of chromosomal aberrations in streptozotocin-treated cells.o-phenanthroline protects mammalian cells from hydrogen peroxide-induced gene mutation and morphological transformation.	Nassi-Calò, Lilian, Mello-Filho A C , Meneghini R . o\r, -Phenanthroline protects mammalian cells from hydrogen peroxide-induced gene mutation and morphological transformation[J]. Carcinogenesis, 1989, 10(6):1055-1057.
T7116	Sodium gualenate	Guaiazulenesulfonate sodium	6223-35-4	[Na+].CC(C)c1ccc(C)c2c(cc(C)c2c1)S([O-])(=O)=O	C15H17NaO3S	300.35	Other countries		Others	Others	Others	Others	Sodium gualenate (Guaiazulenesulfonate sodium), a hydrophilic derivative of guaiazulene (GA), is an unstable compound. It has anti-inflammatory and wound-healing effects.	Cao T , Li Y , Yang Z , et al. Synthesis and Biological Evaluation of 3, 8-dimethyl-5-isopropylazulene Derivatives as Anti-gastric Ulcer Agent[J]. Chemical Biology & Drug Design, 2016, 88(2):264-271.
T5940	Proxyphylline	7-(2-Hydroxypropyl)theophylline	603-00-9	CC(O)Cn1cnc2n(C)c(=O)n(C)c(=O)c12	C10H14N4O3	238.24	NMPA		Cerebrovascular system	GPCR/G Protein; Neuroscience; Metabolism	Adenosine Receptor; PDE	A1; A2A; Adenosine Receptor; PDE	Proxyphylline is a dual of adenosine A1/A2a receptor inhibitor and phosphodiesterase (PDE) inhibitor. Proxyphylline acts as a cardiac stimulant, vasodilator and bronchodilator.	Kukovetz W R , G Pöch, Holzmann S . Overadditive synergism between theophylline, diprophylline and proxyphylline in tracheal smooth muscle relaxation[J]. Arzneimittel-Forschung, 1983, 33(10):1450-1454.
T7126	Hydroquinine	dihydroquinine	522-66-7	CCC1CN2CCC1CC2C(O)c1ccnc2ccc(OC)cc12	C20H26N2O2	326.43		Martindale:The Extra Pharmacopoeia		Others	Others	Others	Hydroquinine, is an organic compound and as a cinchona alkaloid closely related to quinine.	Jansen P H P , Veenhuizen K C W , Verbeek A L M , et al. Efficacy of hydroquinine in preventing frequent ordinary muscle cramp outlasts actual administration[J]. 1994, 122(2):157-161.
T7099	Gefarnate		51-77-4	CC(C)=CCC\C(C)=C\CC\C(C)=C\CCC(=O)OC\C=C(/C)CCC=C(C)C	C27H44O2	400.64	PMDA		Others	Others	Others	Others	Gefarnate is a synthetic compound used for the treatment of gastric ulcers,and also used in the treatment of dry eye syndrome.	Dota A , Takaoka-Shichijo Y , Nakamura M . Gefarnate stimulates mucin-like glycoprotein secretion in conjunctival tissue and ameliorates corneal epithelial damage in animal dry-eye models[J]. Clinical ophthalmology (Auckland, N.Z.), 2013, 7(default):211-217.
T5889	Kojic acid		501-30-4	OCc1cc(=O)c(O)co1	C6H6O4	142.11		Martindale:The Extra Pharmacopoeia		Microbiology/virology; Proteases/Proteasome	Parasite; Tyrosinase	Parasite; tyrosinase	Kojic acid is a fungal metabolite that inhibits tyrosinase, an enzyme involved in melanin synthesis, with an IC50 value of 30.6 µM for mushroom tyrosinase.	Rodrigues A P D , Farias L H S , Carvalho Antonio Sérgio C, et al. A Novel Function for Kojic Acid, a Secondary Metabolite from Aspergillus Fungi, as Antileishmanial Agent[J]. PLoS ONE, 2014, 9(3):e91259-.
T5954	Methyldopa hydrate	Alpha-Methyldopa Sesquihydrate; MK-351 hydrate; Methyldopa hydrate; Methyldopa Sesquihydrate; L-(-)-α-Methyldopa hydrate	41372-08-1	O.O.O.C[C@](N)(Cc1ccc(O)c(O)c1)C(O)=O.C[C@](N)(Cc1ccc(O)c(O)c1)C(O)=O	C10H13NO4·3/2H₂O	238.24	FDA;NMPA;PMDA	JP17	Cardiovascular system	GPCR/G Protein; Neuroscience	Adrenergic Receptor; Dopamine Receptor	Adrenergic Receptor; DOPA decarboxylase	Alpha-Methyldopa Sesquihydrate is a DOPA decarboxylase inhibitor and indirect α2-adrenergic receptor agonist used to treat hypertension. It inhibits the sympathetic nervous system, decreases production of dopamine, norepinephrine, and epinephrine, and exhibits NO-dependent sedative activity.	Baila M R , Cintas J A . [The use of the combination of L-alpha-methyldopa and dichlorothiazide in the treatment of arterial hypertension][J]. El Día Médico, 1962, 34:2422.
T5913	Sulbutiamine	Bisibuthiamine	3286-46-2	CC(C)C(=O)OCC\C(SS\C(CCOC(=O)C(C)C)=C(\C)N(Cc1cnc(C)nc1N)C=O)=C(/C)N(Cc1cnc(C)nc1N)C=O	C32H46N8O6S2	702.89		Martindale:The Extra Pharmacopoeia		oxidation-reduction	Antioxidant	antioxidant	Sulbutiamine is an antioxidant that act by inhibiting oxidative stress induced retinal ganglion cell death.	Kwag J , Majid A S A , Kang K D . Evidence for Neuroprotective Effect of Sulbutiamine against Oxygen–Glucose Deprivation in Rat Hippocampal CA1 Pyramidal Neurons[J]. Biological & Pharmaceutical Bulletin, 2011, 34(11):1759-1764.
T6978	Almitrine mesylate	Almitrine dimesylate; Almitrine mesylate; Almitrine bismesylate; Almitrine bismethanesulfonate	29608-49-9	CS(O)(=O)=O.CS(O)(=O)=O.Fc1ccc(cc1)C(N1CCN(CC1)c1nc(NCC=C)nc(NCC=C)n1)c1ccc(F)cc1	C28H37F2N7O6S2	669.76	NMPA,France		Respiratory system	Membrane transporter/Ion channel	Potassium Channel	Potassium Channel	Almitrine dimesylate inhibits selectively the Ca2+-dependent K+ channel and that in rat chemoreceptor cells,used in the treatment of hypoxemic chronic lung diseases.	J. R. LópezLópez, M. T. PérezGarcía, Canet E , et al. Effects of Almitrine Bismesylate on the Ionic Currents of Chemoreceptor Cells from the Carotid Body[J]. Molecular Pharmacology, 1998, 53(2):330-9.
T7093	Rafoxanide		22662-39-1	Oc1c(I)cc(I)cc1C(=O)Nc1ccc(Oc2ccc(Cl)cc2)c(Cl)c1	C19H11Cl2I2NO3	626.01		IP2010		Cell Cycle/Checkpoint; Microbiology/virology	CDK; Parasite	CDK4; CDK6; Parasite	Rafoxanide as a dual CDK4/6 inhibitor for the treatment of skin cancer. Rafoxanide is a salicylanilide used as an anthelmintic. It is used to treat fluke, hookworm and other infestations.	Shi X, Li H, Shi A et al.Discovery of rafoxanide as a dual CDK4/6 inhibitor for the treatment of skin cancer[J].Oncol Rep. 2018 Sep;40(3):1592-1600.
T5842	Bromocriptine mesylate	CB-154	22260-51-1	CS(O)(=O)=O.CC(C)C[C@@H]1N2C(=O)[C@](NC(=O)[C@H]3CN(C)[C@@H]4Cc5c(Br)[nH]c6cccc(C4=C3)c56)(O[C@@]2(O)[C@@H]2CCCN2C1=O)C(C)C	C33H44BrN5O8S	750.7	FDA	JP17	Others	Autophagy; GPCR/G Protein; Neuroscience	Autophagy; Dopamine Receptor	Autophagy; D2; Dopamine	Bromocriptine is a potent dopamine receptor agonist that binds the D2 receptor with highest affinity (Ki = 2.5 nM)	Renodon A , Boucher J L , Sari M A , et al. Bromocriptine is a strong inhibitor of brain nitric oxide synthase: possible consequences for the origin of its therapeutic effects[J]. 1997, 406(1-2):0-36.
T7111	Tenofovir Disoproxil	Bis(POC)-PMPA; GS 4331	201341-05-1	CC(C)OC(=O)OCOP(=O)(COC(C)Cn1cnc2c(N)ncnc12)OCOC(=O)OC(C)C	C19H30N5O10P	519.44	FDA		Immune system;Infection	Microbiology/virology; Proteases/Proteasome	HBV; HIV Protease; Reverse Transcriptase	HBV; HIV; Reverse Transcriptase	Tenofovir Disoproxil is a nucleotide reverse transcriptase inhibitor to treat HIV and chronic Hepatitis B.	Rachel M , Reagan S , Brooke P , et al. Establishment of HK-2 Cells as a Relevant Model to Study Tenofovir-Induced Cytotoxicity[J]. International Journal of Molecular Sciences, 2017, 18(3):531-.
T5939	Calcium dobesilate		20123-80-2	[Ca++].Oc1ccc(O)c(c1)S([O-])(=O)=O.Oc1ccc(O)c(c1)S([O-])(=O)=O	C12H10CaO10S2	418.41	PMDA		Cardiovascular system	Apoptosis	Apoptosis	Apoptosis	Calcium dobesilate(CaD) has angioprotective properties and protects endothelial cells partly by ameliorating HG‑induced inflammation.	Zhou Y, Yuan J, Qi C et al.Calcium dobesilate may alleviate diabetes‑induced endothelial dysfunction and inflammation.Mol Med Rep[J]. 2017 Dec;16(6):8635-8642.
T6195	Baloxavir marboxil	S-033188	1985606-14-1	COC(=O)OCOc1c2C(=O)N3CCOCC3N(C3c4ccc(F)c(F)c4CSc4ccccc34)n2ccc1=O	C27H23F2N3O7S	571.55	FDA		Immune system;Infection	Microbiology/virology	Influenza Virus	Influenza Virus	Baloxavir marboxil is a novel cap-dependent endonuclease inhibitor for the treatment of influenza A and B virus infections.	Koszalka P , Tilmanis D , Hurt A C . Influenza antivirals currently in late-phase clinical trial[J]. Influenza and Other Respiratory Viruses, 2017, 11(3):240-246.
T5967	Ethacridine lactate	Acrinol; 6,9-DIAMINO-2-ETHOXYACRIDINE LACTATE	1837-57-6	CC(O)C(O)=O.CCOc1ccc2nc3cc(N)ccc3c(N)c2c1	C18H21N3O4	343.38	PMDA		Immune system;Infection	Microbiology/virology	Antibacterial	Bacterial; PARG	Ethacridine lactate is a poly(ADP-ribose) glycohydrolase (PARG) inhibitor.	Purandare V N , Mhatre V , Krishna U R , et al. The place of ethacridine lactate for mid-trimester M.T.P. (Multicentric study)[J]. Journal of Postgraduate Medicine, 1977, 23(2):77-83.
T5886	4-Phenylbutyric acid	Benzenebutyric acid; 4-Phenylbutyric acid	1821-12-1	OC(=O)CCCc1ccccc1	C10H12O2	164.2	PMDA		Others	Chromatin/Epigenetic; DNA Damage/DNA Repair; Microbiology/virology	HDAC; Virus Protease	HDAC; Virus Protease	Benzenebutyric acid is an inhibitor of HDAC,and is an antineoplastic agent.	Tsg-Hui C , Eva S . Enhanced growth inhibition by combination differentiation therapy with ligands of peroxisome proliferator-activated receptor-gamma and inhibitors of histone deacetylase in adenocarcinoma of the lung[J]. Clinical Cancer Research, 2002, 8(4):1206-1212.
T5863	Indinavir sulfate	MK-639 sulfate; L735524 sulfate	157810-81-6	OS(O)(=O)=O.CC(C)(C)NC(=O)C1CN(Cc2cccnc2)CCN1CC(O)CC(Cc1ccccc1)C(=O)NC1C(O)Cc2ccccc12	C36H49N5O8S	711.87	FDA		Immune system;Infection	Microbiology/virology; Proteases/Proteasome	HIV Protease; SARS-CoV	HIV; HIV Protease; SARS-CoV	Indinavir is a HIV protease inhibitor.It inhibits the HIV-1 protease with an IC50 value of 0.41 nM and Ki value of 0.24 nM.	Ekins S , Mathews P , Saito E K , et al. α7-Nicotinic acetylcholine receptor inhibition by indinavir: implications for cognitive dysfunction in treated HIV disease[J]. AIDS (London, England), 2017, 31(8).
T5841	Travoprost	Fluprostenol isopropyl ester; AL6221; Flu-Ipr	157283-68-6	CC(C)OC(=O)CCC\C=C/CC1C(O)CC(O)C1\C=C\C(O)COc1cccc(c1)C(F)(F)F	C26H35F3O6	500.55	FDA	USP42-NF37	Others	GPCR/G Protein; Immunology/Inflammation	Prostaglandin Receptor	Prostaglandin Receptor	Travoprost is used to treat glaucoma and ocular hypertension,is a potent and selective FP prostaglandin receptor agonist.	Hellberg M R , Sallee V L , Mclaughlin M A , et al. Preclinical Efficacy of Travoprost, a Potent and Selective FP Prostaglandin Receptor Agonist[J]. Journal of Ocular Pharmacology and Therapeutics, 2001, 17(5):421-432.
T5964	Olmesartan	RNH 6270; CS 088	144689-24-7	CCCc1nc(c(C(O)=O)n1Cc1ccc(cc1)-c1ccccc1-c1nn[nH]n1)C(C)(C)O	C24H26N6O3	446.5	FDA		Metabolism	Endocrinology/Hormones	RAAS	angiotensin II receptor; Angiotensin Receptor	Olmesartan is an Angiotensin II Type I receptor antagonist. Olmesartan is the active form of the antihypertensive drug olmesartan medoxomil,and has antihypertensive activity.	Haller H , Ito S , Izzo J L , et al. Olmesartan for the Delay or Prevention of Microalbuminuria in Type 2 Diabetes[J]. New England Journal of Medicine, 2011, 364(10):907-917.
T5963	Menadione bisulfite sodium	Menadione sodium bisulfite; Sodium menadione bisulfite; Vitamin K3 sodium bisulfite	130-37-0	[Na+].CC1(CC(=O)c2ccccc2C1=O)S([O-])(=O)=O	C11H9NaO5S	276.24	EMA		Cardiovascular system	Others	Others	Others	Menadione sodium bisulfite(MSB, also known as vitamin K3),is used clinically in China to treat hemorrhagic diseases caused by vitamin K deficiency and globally as a vitamin K supplement.	Yu Z , Yudan Z , Zhuoyi W , et al. Menadione sodium bisulfite inhibits the toxic aggregation of amyloid-β(1–42)[J]. Biochimica et Biophysica Acta (BBA) - General Subjects, 2018, 1862(10):2226-2235.
T5836	Eprinomectin	MK-397	123997-26-2	CC[C@H](C)[C@H]1O[C@@]2(C[C@@H]3C[C@@H](CC=C(C)[C@@H](O[C@H]4C[C@H](OC)[C@@H](O[C@H]5C[C@H](OC)[C@H](NC(C)=O)[C@H](C)O5)[C@H](C)O4)[C@@H](C)C=CC=C4CO[C@@H]5[C@H](O)C(C)=C[C@@H](C(=O)O3)[C@]45O)O2)C=C[C@@H]1C	C50H75NO14	914.13		USP42-NF37		Microbiology/virology	Parasite	Parasite	Eprinomectin is an avermectin with anthelmintic and insecticidal activities.	Baoliang P , Yuwan W , Zhende P , et al. Pharmacokinetics of Eprinomectin in Plasma and Milk following Subcutaneous Administration to Lactating Dairy Cattle[J]. Veterinary Research Communications, 2006, 30(3):263-270.
T5855	Edrophonium chloride		116-38-1	[Cl-].CC[N+](C)(C)c1cccc(O)c1	C10H16ClNO	201.69	FDA	JP17	Others	Neuroscience	AChE	AChE	Edrophonium chloride is an acetylcholinesterase (AChE) inhibitor that is known to prevent the breakdown of the neurotransmitter acetylcholine by binding specifically to its catalytic site.	Boyle N A J , Talesa V , Giovannini E , et al. Synthesis and Study of Thiocarbonate Derivatives of Choline as Potential Inhibitors of Acetylcholinesterase[J]. Journal of Medicinal Chemistry, 1997, 40(19):3009-3013.
T5882	3-Bromopyruvic acid	Bromopyruvic acid; Hexokinase II Inhibitor II, 3-BP	1113-59-3	OC(=O)C(=O)CBr	C3H3BrO3	166.96	FDA		Cancer	Apoptosis; Autophagy; Metabolism	Apoptosis; Autophagy; Hexokinase	Apoptosis; Autophagy; Hexokinase; hexokinase II	3-Bromopyruvic acid is a hexokinase II inhibitor with Ki of 2.4 mM for glycolysis/hexokinase inhibition. It is inhibitor of tumour cell energy metabolism and chemopotentiator of platinum drugs.	Leng X , Peng J , Yu X , et al. 3-Bromopyruvic Acid, A Hexokinase II Inhibitor, is an Effective Antitumor Agent on the Hepatoma Cells : in vitro and in vivo Findings[J]. Anti-Cancer Agents in Medicinal Chemistry (Formerly Current Medicinal Chemistry - Anti-Cancer Agents), 2014, 14(5):-.
T7120	Cefetamet pivoxil hydrochloride	Ro 15-8075	111696-23-2	Cl.CO\N=C(/C(=O)NC1C2SCC(C)=C(N2C1=O)C(=O)OCOC(=O)C(C)(C)C)c1csc(N)n1	C20H26ClN5O7S2	548.03	NMPA		Urinary system;infection	Microbiology/virology	Antibacterial; Antibiotic	Antibiotic; Bacterial	Cefetamet pivoxil hydrochloride is an oral third generation cephalosporin antibiotic.	Divakar G , Shekar H S , Rajamma A J , et al. Formulation development and rheological studies of palatable cefetamet pivoxil hydrochloride dry powder suspension[J]. DARU : Journal of Pharmaceutical Sciences, 2011.
T5856	Barnidipine hydrochloride	Mepirodipine (hydrochloride); YM-09730-5	104757-53-1	Cl.COC(=O)C1=C(C)NC(C)=C(C1c1cccc(c1)[N+]([O-])=O)C(=O)O[C@H]1CCN(Cc2ccccc2)C1	C27H30ClN3O6	528	PMDA		Cardiovascular system	Membrane transporter/Ion channel; Metabolism	Calcium Channel	Calcium Channel	Barnidipine is a dihydropyridine calcium channel blocker that has an IC50 value of 0.35 nM in potassium-induced tonic contraction of pig coronary artery	Kawashima K , Toda H , Oohata H , et al. Antihypertensive and diuretic effects of YM-09730-5, a new calcium antagonist, in stroke-prone spontaneously hypertensive rats[J]. Gen Pharmacol, 1991, 22(2):263-266.
T5858	Sertindole	Lu 23-174	106516-24-9	Fc1ccc(cc1)-n1cc(C2CCN(CCN3CCNC3=O)CC2)c2cc(Cl)ccc12	C24H26ClFN4O	440.94	EMA		Respiratory systemn	Autophagy; GPCR/G Protein; Neuroscience	5-HT Receptor; Adrenergic Receptor; Autophagy; Dopamine Receptor	5-HT; 5-HT Receptor; Adrenergic Receptor; Autophagy; D2; Dopamine	Sertindole is an atypical antipsychotic that binds to dopamine D2 receptors and the serotonin (5-HT) receptor subtypes 5-HT1D, 5-HT2A, and 5-HT2C (Kds = 2.7, 20, 0.14, and 6 nM, respectively)	M?Rk A , Witten L M , Arnt J . Effect of sertindole on extracellular dopamine, acetylcholine, and glutamate in the medial prefrontal cortex of conscious rats: a comparison with risperidone and exploration of mechanisms involved[J]. Psychopharmacology, 2009, 206(1):39-49.
T5666	Dipotassium glycyrrhizinate		68797-35-3	[K+].[K+].[H][C@@]12C[C@](C)(CC[C@]1(C)CC[C@]1(C)C2=CC(=O)[C@]2([H])[C@@]3(C)CC[C@H](O[C@H]4O[C@@H]([C@@H](O)[C@H](O)[C@H]4O[C@@H]4O[C@@H]([C@@H](O)[C@H](O)[C@H]4O)C([O-])=O)C([O-])=O)C(C)(C)[C@]3([H])CC[C@@]12C)C(O)=O	C42H60K2O16	899.12	NMPA		Others	Microbiology/virology	Virus Protease	Virus Protease	Dipotassium glycyrrhizinate is an anionic surfactant having anti-allergic and anti-inflammatory activities.	Lee S H , Bae I H , Choi H , et al. Ameliorating effect of dipotassium glycyrrhizinate on an IL-4- and IL-13-induced atopic dermatitis-like skin-equivalent model[J]. Archives of Dermatological Research, 2018.
T5820	Amsacrine hydrochloride	m-AMSA hydrochloride; acridinyl anisidide hydrochloride	54301-15-4	Cl.COc1cc(NS(C)(=O)=O)ccc1Nc1c2ccccc2nc2ccccc12	C21H20ClN3O3S	429.92	NMPA		Cancer	Autophagy; DNA Damage/DNA Repair	Autophagy; Topoisomerase	Autophagy; Topoisomerase	Amsacrine hydrochloride is topoisomerase II inhibitor , is used in the treatment of acute myelogenous leukemia.	Thomas D , Hammerling B C , Wu K , et al. Inhibition of cardiac HERG currents by the DNA topoisomerase II inhibitor amsacrine: mode of action[J]. British Journal of Pharmacology, 2004, 142(3):485-494.
T5720	Boldine	1,10-Dimethoxy-2,9-dihydroxyaporphine; ex Peumus boldus	476-70-0	[H][C@@]12Cc3cc(O)c(OC)cc3-c3c(OC)c(O)cc(CCN1C)c23	C19H21NO4	327.37		USP42-NF37,BP2019,EP9.7		Others	Others	OPG; RANK; RANKL	Boldine is a natual product .Boldine displays anti-cancer, cytoprotective , anti-oxidant and anti-inflammatory activities.	Gerhardt, Daniéli, Bertola G , Dietrich, Fabrícia, et al. Boldine induces cell cycle arrest and apoptosis in T24 human bladder cancer cell line via regulation of ERK, AKT, and GSK-3β[J]. Urologic Oncology: Seminars and Original Investigations, 2014, 32(1):36.e1-36.e9.
T5832	Besifovir		441785-25-7	Nc1ncc2ncn(CC3(CC3)OCP(O)(O)=O)c2n1	C10H14N5O4P	299.22	KFDA		Infection	Microbiology/virology	HBV	HBV	Besifovir, a parent drug converted by LB80380, further metabolizes to its active form, LB80317. LB80380 is potent antiviral agent against hepatitis B virus (HBV).	Mak L Y , Seto W K , Lai C L , et al. Pharmacokinetic evaluation of besifovir for the treatment of HBV infection[J]. Expert Opinion on Drug Metabolism & Toxicology, 2018, 14(1):101-106.
T5784	Topotecan	SKF 104864A; NSC 609669	123948-87-8	CC[C@@]1(O)C(=O)OCc2c1cc1-c3nc4ccc(O)c(CN(C)C)c4cc3Cn1c2=O	C23H23N3O5	421.45	FDA		Cancer	Autophagy; DNA Damage/DNA Repair	Autophagy; topoisomerase	Autophagy; Eukaryotic topoisomerase I; Topoisomerase	Topotecan is a Topoisomerase I inhibitor,and is an antineoplastic agent used to treat ovarian cancer that works by inhibiting DNA topoisomerases.	Feng-Lei Z , Ping W , Yun-Hui L , et al. Topoisomerase I Inhibitors, Shikonin and Topotecan, Inhibit Growth and Induce Apoptosis of Glioma Cells and Glioma Stem Cells[J]. PLoS ONE, 2013, 8(11):e81815-.
T5603	Phthalic acid	1,2-Benzenedioic acid	88-99-3	OC(=O)c1ccccc1C(O)=O	C8H6O4	166.13		EP9.2,BP2017,USP36-NF31		Others	Others	Others	Phthalic acid is an aromatic dicarboxylic acid. It is a human xenobiotic metabolite.	NA
T5656	(±)-Norcantharidin	Endothall Anhydride; Endothall anhydride	29745-04-8	[H][C@@]12[C@H]3CC[C@H](O3)[C@]1([H])C(=O)OC2=O	C8H8O4	168.15	NMPA		Cancer	Angiogenesis; JAK/STAT signaling; Tyrosine Kinase/Adaptors	c-Met/HGFR; EGFR	c-Met; EGFR	Norcantharidin is a synthetic anticancer compound which is a dual inhibitor for c-Met and EGFR in human colon cancers.	Qiu P , Wang S , Liu M , et al. Norcantharidin Inhibits cell growth by suppressing the expression and phosphorylation of both EGFR and c-Met in human colon cancer cells[J]. BMC Cancer, 2017, 17(1):55.
T5602	Penicillin G potassium	Benzylpenicillin potassium; Penicillin G potassium	113-98-4	[K+].[H][C@]12SC(C)(C)[C@@H](N1C(=O)[C@H]2NC(=O)Cc1ccccc1)C([O-])=O	C16H17KN2O4S	372.48	PMDA		Cardiovascular system,Inflammation	Microbiology/virology	Anti-infection; Antibacterial; Antibiotic	Anti-infection; Antibiotic; Bacterial	Benzylpenicillin potassium is the potassium salt form of penicillin G, a broad-spectrum penicillin antibiotic.	Byra C , Gadbois P , Cox W R , et al. Decreased mortality of weaned pigs with Streptococcus suis with the use of in-water potassium penicillin G[J]. Canadian Veterinary Journal, 2011, 52(3):272.
T5665	Geraniol		106-24-1	C\C(C)=C\CC\C(C)=C\CO	C10H18O	154.25		BP2019,EP9.2		Metabolism; Microbiology/virology	Antifungal; Endogenous Metabolite	Endogenous Metabolite; Fungal	geraniol provides a potent protective effect against cardiac dysfunction induced by diabetes. This ameliorative effect could be attributed to its suppression of oxidative stress.	El-Bassossy HM, Ghaleb H, Elberry AA, et al. Geraniol alleviates diabetic cardiac complications: Effect on cardiac ischemia and oxidative stress.Biomed Pharmacother[J]. 2017 Apr;88:1025-1030.
T5557	Propylparaben	Propyl parahydroxybenzoate; Propyl 4-hydroxybenzoate	94-13-3	CCCOC(=O)c1ccc(O)cc1	C10H12O3	180.2	USA	USP41-NF36,BP2015,IP2010, JP17,USP42-NF37	Others	Apoptosis; Metabolism; Microbiology/virology	Antibacterial; Apoptosis; Endogenous Metabolite	Apoptosis; Bacterial; Endogenous Metabolite; Human Endogenous Metabolite	Propylparaben is an antimicrobial agent, preservative, flavouring agent	Gal A, Gedye K, Craig ZR, Ziv-Gal A.Propylparaben inhibits mouse cultured antral follicle growth, alters steroidogenesis, and upregulates levels of cell-cycle and apoptosis regulators[J].Reprod Toxicol. 2019 Jul 12;89:100-106.
T5562	Methyl nicotinate	methyl pyridine-3-carboxylate	93-60-7	COC(=O)c1cccnc1	C7H7NO2	137.14		EP9.1,BP2017		Others	Others	Others	Methyl nicotinate is the methyl ester of that is used as an active ingredient as a rubefacient in over-the-counter topical preparations indicated for muscle and joint pain. The action of methyl nicotinate as a rubefacient is thought to involve peripheral vasodilation.	Pabst H , Schaefer A , Staiger C , et al. Combination of Comfrey Root Extract Plus Methyl Nicotinate in Patients with Conditions of Acute Upper or Low Back Pain: A Multicentre Randomised Controlled Trial[J]. Phytotherapy Research, 2013, 27(6):811-817.
T7066	Fosphenytoin disodium	Fosphenytoin sodium; ACC-9653	92134-98-0	[Na+].[Na+].[O-]P([O-])(=O)OCN1C(=O)NC(C1=O)(c1ccccc1)c1ccccc1	C16H13N2Na2O6P	406.24	FDA,PMDA		Nervous system	Membrane transporter/Ion channel	Sodium Channel	Sodium Channel	Fosphenytoin is a prodrug of phenytoin that is rapidly converted to phenytoin, a voltage-gated sodium channel blocker	Smith R D , Brown B S , Maher R W , et al. Pharmacology of ACC‐9653 (Phenytoin Prodrug)[J]. Epilepsia, 2010, 30(s2):S15-S21.
T5543	TriacetonaMine	2,2,6,6-Tetramethyl-4-piperidinone; tempidon; tmpone; Odoratine; Vincubine	826-36-8	CC1(C)CC(=O)CC(C)(C)N1	C9H17NO	155.24		Martindale:The Extra Pharmacopoeia		Others	Others	Others	Triacetonamine protects the activitis of superoxide dismutase(SOD) and creatine phos-phate kinase (CPK); it also inhibits CaCl2 induced agglomeration of thromocyte. Triacetonamine can improve the constructile function of heart mus-cles of acute anemia and decrease the content of malodialdehyde (MDA) in the heart muscles.	Protective Effects of Triacetonamine on Acute Ischemia Isolated Rat Heart Muscles[J]. Supplement to the Journal of Sun Yatsen University, 1994.
T5559	Carboxin	Carboxine; Carbathiin; Vitavax; Kisvax; Carboxin	5234-68-4	CC1=C(SCCO1)C(=O)Nc1ccccc1	C12H13NO2S	235.3	other countries		Infection	Microbiology/virology	Antibiotic; Antifungal	Antibiotic; Fungal	Carboxin appears as off-white crystals. Systemic fungicide and seed protectant.	Roos G . [Mechanism of action of the systemic fungicide carboxine].[J]. Zeitschrift Fur Allgemeine Mikrobiologie, 1972, 12(4):271.
T5570	Cephalothin	Cephalotin acid; Cephalothin	153-61-7	CC(=O)OCC1=C(N2[C@H](SC1)[C@H](NC(=O)Cc1cccs1)C2=O)C(O)=O	C16H16N2O6S2	396.44	FDA		infection	Microbiology/virology	Antibacterial; Antibiotic	Antibiotic; Bacterial; β-Lactamase	Cephalotin acid is a beta-lactam antibiotic, inhibits class C β-lactamase AmpC (Ki: 0.32 µM).	Morandi S, et al. Structure-based optimization of cephalothin-analogue boronic acids as beta-lactamase inhibitors. Bioorg Med Chem. 2008 Feb 1;16(3):1195-205. Epub 2007 Nov 7.
T5584	Phytic acid sodium salt	Sodium phytate hydrate	14306-25-3	[Na+].[Na+].[Na+].[Na+].[Na+].[Na+].[Na+].[Na+].[Na+].[Na+].[Na+].[Na+].[O-]P([O-])(=O)O[C@H]1[C@H](OP([O-])([O-])=O)[C@@H](OP([O-])([O-])=O)[C@H](OP([O-])([O-])=O)[C@H](OP([O-])([O-])=O)[C@@H]1OP([O-])([O-])=O	C6H6O24P6•12Na	923.82	NMPA		Endocrine system	Others	Others	iron chelator	Sodium phytate is known to function as a [PO4]3- storage depot and a precursor for other inositol phosphates and pyrophosphates. It is a potent chelator of divalent and trivalent cations in vitro.	Shears SB. Assessing the omnipotence of inositol hexakisphosphate. Cell Signal. 2001 Mar;13(3):151-8.
T5519	Bivalirudin	Hirulog-1; BG-8967	128270-60-0	CC[C@H](C)[C@H](NC(=O)[C@H](CCC(O)=O)NC(=O)[C@H](CCC(O)=O)NC(=O)[C@H](Cc1ccccc1)NC(=O)[C@H](CC(O)=O)NC(=O)CNC(=O)[C@H](CC(N)=O)NC(=O)CNC(=O)CNC(=O)CNC(=O)CNC(=O)[C@@H]1CCCN1C(=O)[C@H](CCCNC(N)=N)NC(=O)[C@@H]1CCCN1C(=O)[C@H](N)Cc1ccccc1)C(=O)N1CCC[C@H]1C(=O)N[C@@H](CCC(O)=O)C(=O)N[C@@H](CCC(O)=O)C(=O)N[C@@H](Cc1ccc(O)cc1)C(=O)N[C@@H](CC(C)C)C(O)=O	C98H138N24O33	2180.29	FDA		Cardiovascular system	Proteases/Proteasome	Thrombin	Thrombin	Bivalirudin is a reversible inhibitor of α- and ζ-thrombin (Kis = 2.56 and 1.84 nM, respectively), enzymes that exhibit high fibrinogen-clotting activities.	Witting JI, et al. Thrombin-specific inhibition by and slow cleavage of hirulog-1. Biochem J. 1992 May 1;283 ( Pt 3):737-43.
T5552	Methyl cinnamate		103-26-4	COC(=O)\C=C\c1ccccc1	C10H10O2	162.19		BP2019,EP9.2		Microbiology/virology; PI3K/Akt/mTOR signaling; Proteases/Proteasome	AMPK; Antibacterial; Tyrosinase	AMPK; Bacterial; Tyrosinase	Methyl cinnamate, a tyrosinase inhibitor and a flavoring compound, has antimicrobial, antiadipogenic, vasorelaxant, and anti-inflammatory effects.	Vasconcelos-Silva AA, et al. Vasorelaxation induced by methyl cinnamate, the major constituent of the essential oil of Ocimum micranthum, in rat isolated aorta. Clin Exp Pharmacol Physiol. 2014 Oct;41(10):755-62.
T5471	GUANABENZ		5051-62-7	NC(=N)NN=Cc1c(Cl)cccc1Cl	C8H8Cl2N4	231.08	PMDA		Cardiovascular system	GPCR/G Protein; Neuroscience	Adrenergic Receptor	α2 adrenergic receptor	GUANABENZ is a Central alpha-2 Adrenergic Agonist. The mechanism of action of guanabenz is as an Adrenergic alpha2-Agonist.	Hashimoto J , Chonan K , Aoki Y , et al. Therapeutic effects of evening administration of guanabenz and clonidine on morning hypertension:, evaluation using home-based blood pressure measurements[J]. Journal of Hypertension, 2003, 21(4):805-11.
T5462	Almonertinib	HS-10296; Almonertinib	1899921-05-1	COc1cc(N(C)CCN(C)C)c(NC(=O)C=C)cc1Nc1nccc(n1)-c1cn(C2CC2)c2ccccc12	C30H35N7O2	525.66	NMPA		Cancer	Angiogenesis; JAK/STAT signaling; Tyrosine Kinase/Adaptors	EGFR	EGFR; EGFR (E746_A750/T790M)	Hs-10296 is an inhibitor of EGFR activation mutation and tolerant mutation of EGFR T790M, which has only limited activity against wild-type EGFR.	NA
T5460	Mofezolac		78967-07-4	COc1ccc(cc1)-c1noc(CC(O)=O)c1-c1ccc(OC)cc1	C19H17NO5	339.35	PMDA		Inflammation	Immunology/Inflammation; Neuroscience	COX	COX	Mofezolac (formerly known as Disopain or N-22) is a highly selective COX-1 (cyclooxygenase-1) inhibitor with COXs selectivity index > 6000	Calvello R, et al.Highly Selective Cyclooxygenase-1 Inhibitors P6 and Mofezolac Counteract Inflammatory State both In Vitro and In Vivo Models of Neuroinflammation.Front Neurol. 2017 Jun 9;8:251
T6S1529	Cynarin	1,5-Dicaffeoylquinic acid; Cynarine; Cyclohexanecarboxyli​c acid, 1,​3-​bis[[3-​(3,​4-​dihydroxyphenyl)​-​1-​oxo-​2-​propen-​1-​yl]​oxy]​-​4,​5-​dihydroxy-​, (1R,​3R,​4S,​5R)​-	30964-13-7	O[C@@H]1C[C@](C[C@@H](OC(=O)\C=C\c2ccc(O)c(O)c2)[C@H]1O)(OC(=O)\C=C\c1ccc(O)c(O)c1)C(O)=O	C25H24O12	516.45		EP10.2		Immunology/Inflammation; Metabolism; NF-κB; Microbiology/virology; oxidation-reduction	Antioxidant; Antiviral; Influenza Virus; Reactive Oxygen Species	Antioxidant; Antiviral; Influenza Virus; Reactive Oxygen Species	1,5-Dicaffeoylquinic acid has neuroprotective, and antioxidant effects, it can inhibition of GSK3β as well as the modulation of Bcl-2/Bax.	Cao X, et al. 1, 5-Dicaffeoylquinic acid-mediated glutathione synthesis through activation of Nrf2 protects against OGD/reperfusion-induced oxidative stress in astrocytes.Brain Res. 2010 Aug 6;1347:142-8
T5573	Coenzyme Q9	Ubiquinone Q9; CoQ9; Ubiquinone 9	303-97-9	COC1=C(OC)C(=O)C(C\C=C(/C)CC\C=C(/C)CC\C=C(/C)CC\C=C(/C)CC\C=C(/C)CC\C=C(/C)CC\C=C(/C)CC\C=C(/C)CC\C=C(\C)C)=C(C)C1=O	C54H82O4	795.23		USP42-NF37		Apoptosis; Metabolism	Apoptosis; Endogenous Metabolite	Apoptosis; Endogenous Metabolite; Human Endogenous Metabolite	Coenzyme Q9 (CoQ9) is a normal constituent of human plasma. CoQ9 in human plasma may originate as a product of incomplete CoQ10 biosynthesis or from the diet.	Lekli I, et al. Coenzyme Q9 provides cardioprotection after converting into coenzyme Q10. J Agric Food Chem. 2008 Jul 9;56(13):5331-7.
T5515	Hemin	Hemin chloride	16009-13-5	[Cl-].[Fe+3].Cc1c(CCC(O)=O)c2cc3[n-]c(cc4nc(cc5[n-]c(cc1n2)c(C=C)c5C)c(C=C)c4C)c(C)c3CCC(O)=O	C34H32ClFeN4O4	651.94	usa;Canada		Others	Apoptosis; Autophagy	Autophagy; Ferroptosis; Mitophagy	(HO)-1; Autophagy; Ferroptosis; Mitophagy	Hemin is an iron-containing porphyrin and Heme oxygenase (HO)-1 inducer.	Vanova K , Boukalova S , Gbelcova H , et al. Heme oxygenase is not involved in the anti-proliferative effects of statins on pancreatic cancer cells[J]. BMC Cancer, 2016, 16(1):309.
T5520	Cetrorelix Acetate	Cetrorelix	145672-81-7	CC(O)=O.CC(C)C[C@H](NC(=O)[C@@H](CCCNC(N)=O)NC(=O)[C@H](Cc1ccc(O)cc1)NC(=O)[C@H](CO)NC(=O)[C@@H](Cc1cccnc1)NC(=O)[C@@H](Cc1ccc(Cl)cc1)NC(=O)[C@@H](Cc1ccc2ccccc2c1)NC(C)=O)C(=O)N[C@@H](CCCNC(N)=N)C(=O)N1CCC[C@H]1C(=O)N[C@H](C)C(N)=O	C70H92ClN17O14.C2H4O2	1491.11	EMA		Others	GPCR/G Protein	GNRH Receptor	GnRHR	Cetrorelix Acetate is gonadotropin-releasing hormone (GnRH) receptor antagonist with an IC50 of 1.21 nM.	Gründker, Carsten, Emons, Günter. Role of gonadotropin-releasing hormone (GnRH) in ovarian cancer[J]. Reproductive Biology & Endocrinology Rb & E, 2003, 1(1):65-65.
T5495	Decloxizine dihydrochloride	UCB 1402 dihydrochloride	13073-96-6	Cl.Cl.OCCOCCN1CCN(CC1)C(c1ccccc1)c1ccccc1	C21H28N2O2.2ClH	413.39	NMPA		Respiratory system	GPCR/G Protein; Immunology/Inflammation; Neuroscience	Histamine Receptor	H1 receptor; Histamine Receptor	Decloxizine dihydrochloride is a histamine 1 receptor antagonist.	Vaerenberg C . [Study of the possible effect of decloxizine on blood gas levels][J]. Acta Tuberc Pneumol Belg, 1968, 59(4):633-636.
T5396	Letermovir	AIC246; MK-8828	917389-32-3	COc1cccc(c1)N1CCN(CC1)C1=Nc2c(F)cccc2[C@H](CC(O)=O)N1c1cc(ccc1OC)C(F)(F)F	C29H28F4N4O4	572.55	FDA		Others	Microbiology/virology; Proteases/Proteasome	HCV Protease	CMV; HCMV	Letermovir (AIC246) is a novel anti-CMV compound (EC50: about 5 nM in fibroblast cells). It targets the pUL56 subunit of the viral terminase complex.	Lischka P, et al. In vitro and in vivo activities of the novel anticytomegalovirus compound AIC246. Antimicrob Agents Chemother. 2010 Mar;54(3):1290-7.
T5391	Bepridil hydrochloride	CERM 1978	68099-86-5	Cl.CC(C)COCC(CN(Cc1ccccc1)c1ccccc1)N1CCCC1	C24H35ClN2O	403	FDA		Cardiovascular system	Membrane transporter/Ion channel; Metabolism	Calcium Channel	Calcium Channel	Bepridil is a calcium channel blocker and also inhibits Na+/Ca2+ exchange (NCX), sodium channels and cardiac sarcolemmal KATP channels.	Flaim SF, et al. Effects of bepridil hydrochloride on cardiocirculatory dynamics, coronary vascular resistance, and cardiac output distribution in normal, conscious rats. J Cardiovasc Pharmacol. 1988 Mar;11(3):363-72.
T5394	Prulifloxacin	NM441; AF 3012; Pruvel	123447-62-1	CC1Sc2c(C(O)=O)c(=O)c3cc(F)c(cc3n12)N1CCN(Cc2oc(=O)oc2C)CC1	C21H20FN3O6S	461.46	PMDA		Infection	DNA Damage/DNA Repair; Microbiology/virology	Antibacterial; Antibiotic; Topoisomerase	Antibiotic; Bacterial; Topo II; Topo IV	Prulifloxacin is a broad-spectrum fluoroquinolone antibiotic. It Inhibits bacterial DNA synthesis by inhibiting the activity of bacterial DNA topoisomerase II and IV.	Giannarini G, et al. Prulifloxacin: clinical studies of a broad-spectrum quinolone agent. Future Microbiol. 2009 Feb;4(1):13-24.
T5376	Aranidipine	MPC1304	86780-90-7	COC(=O)C1=C(C)NC(C)=C(C1c1ccccc1[N+]([O-])=O)C(=O)OCC(C)=O	C19H20N2O7	388.37	PMDA		Cardiovascular system	Membrane transporter/Ion channel; Metabolism	Calcium Channel	Calcium Channel	Aranidipine (MPC1304) is a calcium channel antagonist with potent and long-lasting antihypertensive effects.	Masumiya H, et al. Inhibition of T-type and L-type Ca(2+) currents by aranidipine, a novel dihydropyridine Ca(2+) antagonist. Pharmacology. 2000 Aug;61(2):57-61.
T5369	Docosahexaenoic Acid	DHA; Cervonic Acid	6217-54-5	CC\C=C/C\C=C/C\C=C/C\C=C/C\C=C/C\C=C/CCC(O)=O	C22H32O2	328.49	PMDA		Digestive system	Metabolism	Endogenous Metabolite	Endogenous Metabolite	Docosahexaenoic Acid (DHA) is an essential fatty acid and an omega-3 fatty acid abundant in brain and retina.	Zapata-Gonzalez F, et al. Human dendritic cell activities are modulated by the omega-3 fatty acid, docosahexaenoic acid, mainly through PPAR(gamma):RXR heterodimers: comparison with other polyunsaturated fatty acids. J Leukoc Biol. 2008 Oct;84(4):1172-82.
T5372	L-SelenoMethionine	L-(+)-Selenomethionine	3211-76-5	C[Se]CC[C@H](N)C(O)=O	C5H11NO2Se	196.1	Other countries		Urinary system	Apoptosis; Metabolism	Amino Acids and Derivatives; Apoptosis; Endogenous Metabolite	Amino Acids and Derivatives; Apoptosis; Endogenous Metabolite	L-Selenomethionine is a naturally occurring amino acid. It promotes cell cycle progression and elevates the expression of the antioxidant enzymes thioredoxin reductase, glutathione reductase.	Stewart J, et al. Effects of selenomethionine on the gene expression profile of cloned human prostate cancer cells representing a phenotypic continuum of cancer progression. Nutr Cancer. 2008;60(6):826-36.
T5368	Eicosapentaenoic Acid	EPA; Timnodonic acid	10417-94-4	CC\C=C/C\C=C/C\C=C/C\C=C/C\C=C/CCCC(O)=O	C20H30O2	302.45	FDA		Metabolism	Metabolism	Endogenous Metabolite	Endogenous Metabolite	Eicosapentaenoic Acid (EPA) is a ω-3 fatty acid abundantly available in marine organisms.	Wada M, et al. Enzymes and receptors of prostaglandin pathways with arachidonic acid-derived versus eicosapentaenoic acid-derived substrates and products. J Biol Chem. 2007 Aug 3;282(31):22254-66.
T5330	Fluralaner	AH252723; A1443	864731-61-3	Cc1cc(ccc1C(=O)NCC(=O)NCC(F)(F)F)C1=NOC(C1)(c1cc(Cl)cc(Cl)c1)C(F)(F)F	C22H17Cl2F6N3O3	556.29	EMA		Others	Membrane transporter/Ion channel; Neuroscience; Microbiology/virology	GABA Receptor; Parasite	GABA; Parasite	Fluralaner is an isoxazoline ectoparasiticide. It potently and selectively inhibits binding of the GABA receptor channel blocker EBOB to housefly head membranes (IC50: 455 pM).	Ozoe Y, et al. The antiparasitic isoxazoline A1443 is a potent blocker of insect ligand-gated chloride channels. Biochem Biophys Res Commun. 2010 Jan 1;391(1):744-9.
T5326	Sugammadex sodium	Sugammadex (sodium); Org25969; Sugammadex sodium	343306-79-6	[Na+].[Na+].[Na+].[Na+].[Na+].[Na+].[Na+].[Na+].O[C@@H]1[C@@H](O)[C@@H]2O[C@H]3O[C@H](CSCCC([O-])=O)[C@@H](O[C@H]4O[C@H](CSCCC([O-])=O)[C@@H](O[C@H]5O[C@H](CSCCC([O-])=O)[C@@H](O[C@H]6O[C@H](CSCCC([O-])=O)[C@@H](O[C@H]7O[C@H](CSCCC([O-])=O)[C@@H](O[C@H]8O[C@H](CSCCC([O-])=O)[C@@H](O[C@H]9O[C@H](CSCCC([O-])=O)[C@@H](O[C@H]1O[C@@H]2CSCCC([O-])=O)[C@H](O)[C@H]9O)[C@H](O)[C@H]8O)[C@H](O)[C@H]7O)[C@H]…	C72H104Na8O48S8	2178.01	FDA		Nervous system	Others	Others	Others	Sugammadex, a synthetic derivative of γ-cyclodextrin, is a steroid-based neuromuscular blocker reversing agent.	de Boer HD, et al. Reversal of profound rocuronium neuromuscular blockade by sugammadex in anesthetized rhesus monkeys. Anesthesiology. 2006 Apr;104(4):718-23.
T5325	Nifurtimox	BAY-2502; BAY-A-2502	23256-30-6	CC1CS(=O)(=O)CCN1\N=C\c1ccc(o1)[N+]([O-])=O	C10H13N3O5S	287.3	FDA	Martindale:The Extra Pharmacopoeia	Infection	Metabolism; Microbiology/virology	Dehydrogenase; Parasite	Lactate Dehydrogenase; Parasite	Nifurtimox is an antiprotozoal agent (IC50s = 9.91, 12.28, and 10.44 μM against Taluahuén, LQ, and Brener strains of T. cruzi­ epimastigotes, respectively).	Maya JD, et al. Trypanosoma cruzi: effect and mode of action of nitroimidazole and nitrofuran derivatives. Biochem Pharmacol. 2003 Mar 15;65(6):1999-12006.
T5328	Fosfluconazole		194798-83-9	OP(O)(=O)OC(Cn1cncn1)(Cn1cncn1)c1ccc(F)cc1F	C13H13F2N6O4P	386.25	FDA		Immune system;Infection	Microbiology/virology	Antifungal	Antifungal; Fungal	Fosfluconazole is water-soluble phosphate prodrug of fluconazole. Fluconazole is an antifungal drug.	Aoyama T, et al. Pharmacokinetics of fluconazole and Fosfluconazole after intraperitoneal administration to peritoneal dialysis rats. Drug Metab Pharmacokinet. 2005 Dec;20(6):485-90.
T5327	Amezinium methylsulfate	Amezinium (methylsulfate); Lu-1631; Amezinium methylsulfate; Amezinium metilsulfate	30578-37-1	COS([O-])(=O)=O.COc1cc(N)cn[n+]1-c1ccccc1	C12H15N3O5S	313.33	Other countries		Others	GPCR/G Protein; Neuroscience	Adrenergic Receptor	Adrenergic Receptor; α-adrenergic receptor; β1-adrenergic receptor	Amezinium metilsulfate has multiple mechanisms, including stimulation of alpha and beta-1 receptors and inhibition of noradrenaline and tyramine uptake.	Sakakibara R, et al. Amezinium metilsulfate, a sympathomimetic agent, may increase the risk of urinary retention in multiple system atrophy. Clin Auton Res. 2003 Feb;13(1):51-3.
T5323	Toloxatone	MD 69276; Toloxatone	29218-27-7	Cc1cccc(c1)N1CC(CO)OC1=O	C11H13NO3	207.23	PMDA,France	EP, BJP	Nervous system	Neuroscience	MAO; monoamine oxidase	MAO-A; Monoamine Oxidase	MD 69276 (Toloxatone) is a reversible monoamine oxidase A (MAOA) inhibitor.	FMoureau, et al. A reversible monoamine oxidase inhibitor, toloxatone: spectrophotometric and molecular orbital studies of the interaction with flavin adenine dinucleotide (FAD). European Journal of Medicinal Chemistry. 1994, 29(4):269-277.
T3948	Undecanoic acid	Hendecanoic acid; Undecanoic acid; Undecylic acid	112-37-8	CCCCCCCCCCC(O)=O	C11H22O2	186.29		BP2019,EP9.2		Metabolism; Microbiology/virology	Antifungal; Endogenous Metabolite	Endogenous Metabolite; Fungal	Undecanoic acid (Undecanoate) is a monocarboxylic acid with antimycotic property, which inhibits the production of exocellular keratinase, lipase and the biosynthesis of several phospholipids in T. rubrum[1].	Hornung B, et al. Medium chain length fatty acids stimulate triacylglycerol synthesis in tissue culture cells. Biochem Pharmacol. 1992 Jan 22;43(2):175-81.
T5292	N-Acetyl-L-tyrosine	Ac-Tyr-OH	537-55-3	CC(=O)N[C@@H](Cc1ccc(O)cc1)C(O)=O	C11H13NO4	223.23	FDA		Others	Metabolism	Endogenous Metabolite	Endogenous Metabolite	Acetyltyrosine is a side chain reaction of tyrosine. It converts to tyrosine and then can be used in neurotransmitter treatment as a precursor of cathecholamine.	Rao NR, et al. Estimation of serum alpha 2-macroglobulin based on the esterolytic activity of bound alpha-chymotrypsin. Biochem Med. 1984 Dec;32(3):357-63.
T5126	Glecaprevir	ABT-493	1365970-03-1	CC(C)(C)[C@@H]1NC(=O)O[C@@H]2CCC[C@H]2OCC=CC(F)(F)c2nc3ccccc3nc2O[C@@H]2C[C@H](N(C2)C1=O)C(=O)N[C@@]1(C[C@H]1C(F)F)C(=O)NS(=O)(=O)C1(C)CC1	C38H46F4N6O9S	838.87	FDA		Infection	Microbiology/virology; Proteases/Proteasome	HCV Protease; SARS-CoV	HCV; HCV NS3/4A protease; SARS-CoV	Glecaprevir is an HCV NS3/4A protease inhibitor, (IC50s: 3.5-11.3 nM).	Ng TI, et al. In Vitro Antiviral Activity and Resistance Profile of the Next-Generation Hepatitis C Virus NS3/4A Protease Inhibitor Glecaprevir. Antimicrob Agents Chemother. 2017 Oct 30. pii: AAC.201620-17.
T5174	Nestoron	Nestorone; ST-1435; Elcometrine; Segesterone Acetate	7759-35-5	CC(=O)O[C@]1(C(C)=O)C(=C)C[C@H]2[C@@H]3CCC4=CC(=O)CC[C@@H]4[C@H]3CC[C@]12C	C23H30O4	370.48	FDA		Others	Endocrinology/Hormones	Estrogen/progestogen Receptor; progesterone receptor	PR; Progesterone Receptor	Nestoron, a synthetic progestin, is a high-affinity agonist of the progesterone receptor (EC50: 10.3 nM).	Kumar N, et al. Nestorone: a progestin with a unique pharmacological profile. Steroids. 2000 Oct-Nov;65(10-11):629-36.
T5189	Omadacycline	Amadacycline; PTK 0796	389139-89-3	CN(C)[C@H]1[C@@H]2C[C@@H]3Cc4c(cc(CNCC(C)(C)C)c(O)c4C(=O)C3=C(O)[C@]2(O)C(=O)C(C(N)=O)=C1O)N(C)C	C29H40N4O7	556.65	FDA		Infection	Microbiology/virology	Antibacterial; Antibiotic; ribosome	30S ribosome; Antibiotic; Bacterial	Omadacycline, a new tetracycline antibiotic, can inhibit the 30s subunit of bacterial ribosome.	Shoen C, et al. In vitro activities of omadacycline against rapidly growing mycobacteria. Antimicrob Agents Chemother. 2019 Mar 11.
T5186	Oseltamivir acid	oseltamivir carboxylate; Ro 64-0802; GS 4071	187227-45-8	CCC(CC)O[C@@H]1C=C(C[C@H](N)[C@H]1NC(C)=O)C(O)=O	C14H24N2O4	284.35	FDA		Infection	Metabolism; Microbiology/virology	Drug Metabolite; Influenza Virus	Drug Metabolite; influenza viral neuraminidase; Influenza Virus	Oseltamivir acid (GS4071) is a potent influenza virus neuraminidase inhibitor and the prodrug of GS4071.	Sidwell RW, et al. Inhibition of influenza virus infections in mice by GS4104, an orally effective influenza virus neuraminidase inhibitor. Antiviral Res. 1998 Feb;37(2):107-20.
T5177	Asciminib	ABL001	1492952-76-7	O[C@@H]1CCN(C1)c1ncc(cc1-c1ccn[nH]1)C(=O)Nc1ccc(OC(F)(F)Cl)cc1	C20H18ClF2N5O3	449.84	FDA		Cancer	Angiogenesis; Cytoskeletal Signaling; Tyrosine Kinase/Adaptors	Bcr-Abl	Abl1; Bcr-Abl	Asciminib (ABL001) is a potent and selective Bcr-Abl inhibitor (Kd: 0.5–0.8nM).	Wylie AA, et al. The allosteric inhibitor ABL2001 enables dual targeting of BCR-ABL1. Nature. 2017 Mar 30;543(7647):733-737.
T5164	Cabozantinib hydrochloride	XL184; BMS-907351; Cabozantinib hydrochloride (849217-68-1(free base))	T5164	Cl.COc1cc2nccc(Oc3ccc(NC(=O)C4(CC4)C(=O)Nc4ccc(F)cc4)cc3)c2cc1OC	C28H25ClFN3O5	537.96	FDA		Cancer	Angiogenesis; Tyrosine Kinase/Adaptors; Metabolism	c-Kit; c-Met/HGFR; FLT; ROR; TAM Receptor; VEGFR	Axl; c-Kit; c-Met; FLT4; RORα; RORγ; VEGFR2/KDR	Cabozantinib (XL184) is a potent pan-tyrosine kinases inhibitor that inhibits VEGFR2, c-Met, Kit, Axl, and Flt4 (IC50s: 0.035, 1.3, 4.6, 7 and 6 nM).	Yakes FM, et al. Cabozantinib (XL184), a novel MET and VEGFR2 inhibitor, simultaneously suppresses metastasis, angiogenesis, and tumor growth. Mol Cancer Ther, 2011, 10(12), 2298-2308.
T5159	Olodaterol hydrochloride	BI 1744 hydrochloride; Olodaterol hydrochloride; BI-1744 HCl	869477-96-3	Cl.COc1ccc(CC(C)(C)NC[C@H](O)c2cc(O)cc3NC(=O)COc23)cc1	C21H27ClN2O5	422.9	FDA		Respiratory system	GPCR/G Protein; Neuroscience	Adrenergic Receptor	Adrenergic Receptor; β2-adrenoceptor	Olodaterol is a novel, long-acting β2-adrenergic agonist (EC50s: 97.7 nM for the human β2-adrenoceptor) that exerts its pharmacological effect by binding and activating β2-adrenergic receptors.	Bouyssou T, et al. Discovery of olodaterol, a novel inhaled beta2-adrenoceptor agonist with a 24 h bronchodilatory efficacy. Bioorg Med Chem Lett. 2010 Feb 15;20(4):1410-4.
T4981	Anisotropine Methylbromide		80-50-2	[Br-].CCCC(CCC)C(=O)O[C@@H]1C[C@@H]2CC[C@H](C1)[N+]2(C)C	C17H32BrNO2	362.35	FDA		Digestive system;Inflammation	GPCR/G Protein; Immunology/Inflammation; Neuroscience	AChR; Prostaglandin Receptor	Cholinergic; DP1; EP2; IP	Anisotropine Methylbromide is an anticholinergic agent and has been used for relief of gastrointestinal spasm and for the suppression of gastric acid secretion.	Freston JW, et al. A double-blind evaluation of the nocturnal antisecretory effects of anisotropine methylbromide in man. Dose response and duration of action studies. J Clin Pharmacol. 1977 Jan;17(1):29-36.
T5171	Treprostinil Sodium	UT-15	289480-64-4	[Na+].CCCCC[C@H](O)CC[C@H]1[C@H](O)C[C@@H]2Cc3c(C[C@H]12)cccc3OCC([O-])=O	C23H33NaO5	412.5	FDA		Respiratory system	Angiogenesis; Tyrosine Kinase/Adaptors; Apoptosis; GPCR/G Protein; Immunology/Inflammation	c-RET; Prostaglandin Receptor; VEGFR	DP1; EP3; IP; Prostaglandin Receptor; RET; VEGFR2	Treprostinil is a potent DP1, IP and EP2 agonist (EC50: 0.6/1.9/6.2 nM).	Whittle BJ, et al. Binding and activity of the prostacyclin receptor (IP) agonists, treprostinil and iloprost, at human prostanoid receptors: treprostinil is a potent DP1 and EP2 agonist. Biochem Pharmacol. 2012 Jul 1;84(1):68-75.
T5127	ABT530	ABT 530; ABT-530; Pibrentasvir	1353900-92-1	CO[C@H](C)[C@H](NC(=O)OC)C(=O)N1CCC[C@H]1c1nc2cc(F)c(cc2[nH]1)[C@H]1CC[C@@H](N1c1cc(F)c(N2CCC(CC2)c2ccc(F)cc2)c(F)c1)c1cc2[nH]c(nc2cc1F)[C@@H]1CCCN1C(=O)[C@@H](NC(=O)OC)[C@@H](C)OC	C57H65F5N10O8	1113.18	FDA		Infection	Microbiology/virology; Proteases/Proteasome	HCV Protease	HCV NS5A	ABT-530 (Pibrentasvir) is an HCV NS5A inhibitor with EC50s ranging from 1.4-5.0 pM against HCV replicons containing NS5A from genotypes 1-6.	Ng TI, et al. In Vitro Antiviral Activity and Resistance Profile of the Next-Generation Hepatitis C Virus NS5A Inhibitor Pibrentasvir. Antimicrob Agents Chemother. 2017 Apr 24;61(5). pii: e02558-16.
T5150	Treprostinil	LRX-15; Orenitram; Remodulin	81846-19-7	CCCCC[C@H](O)CC[C@H]1[C@H](O)C[C@@H]2Cc3c(C[C@H]12)cccc3OCC(O)=O	C23H34O5	390.51	FDA		Respiratory system	GPCR/G Protein; Immunology/Inflammation	Prostaglandin Receptor	DP1; EP2; IP; Prostaglandin Receptor	Treprostinil is a potent DP1, IP and EP2 agonist (EC50: 0.6/1.9/6.2 nM).	Whittle BJ, et al. Binding and activity of the prostacyclin receptor (IP) agonists, treprostinil and iloprost, at human prostanoid receptors: treprostinil is a potent DP1 and EP2 agonist. Biochem Pharmacol. 2012 Jul 1;84(1):68-75.
T5148	Atosiban acetate (90779-69-4 free base)	RW22164; RWJ22164	914453-95-5	CC(O)=O.CCOc1ccc(C[C@H]2NC(=O)CCSSC[C@H](NC(=O)[C@H](CC(N)=O)NC(=O)[C@@H](NC(=O)[C@@H](NC2=O)[C@@H](C)CC)[C@@H](C)O)C(=O)N2CCC[C@H]2C(=O)N[C@@H](CCCN)C(=O)NCC(N)=O)cc1	C45H71N11O14S2	1054.24	NMPA,EMA,United Kingdom,France ,Germany		Others	Endocrinology/Hormones; GPCR/G Protein	Oxytocin Receptor; Vasopressin Receptor	Oxytocin Receptor; Vasopressin Receptor	Atosiban is an inhibitor of the hormones oxytocin and vasopressin. It is used as an intravenous medication as a labour repressant (tocolytic) to halt premature labor. Atosiban inhibits the oxytocin-mediated release of inositol trisphosphate from the myometrial cell membrane. As a result, there is reduced release of intracellular, stored calcium from the sarcoplasmic reticulum of myometrial cells,…	Akerlund M, et al. The effect on the human uterus of two newly developed competitive inhibitors of oxytocin and vasopressin. Acta Obstet Gynecol Scand. 1985;64(6):499-504.
T5144	Desmopressin acetate (16679-58-6 free base)	DDAVP	62288-83-9	CC(O)=O.NC(=O)CC[C@@H]1NC(=O)[C@H](Cc2ccccc2)NC(=O)[C@H](Cc2ccc(O)cc2)NC(=O)CCSSC[C@H](NC(=O)[C@H](CC(N)=O)NC1=O)C(=O)N1CCC[C@H]1C(=O)N[C@@H](CCCNC(N)=N)C(=O)NCC(N)=O	C48H68N14O14S2	1129.26	FDA		Metabolism	GPCR/G Protein	Vasopressin Receptor	Vasopressin receptor 1; vasopressin receptor 1a; Vasopressin receptor 2	Desmopressin is the synthetic analog of the antidiuretic hormone arginine vasopressin. Vasopressin Receptor The antidiuretic properties of desmopressin have led to its use in polyuric conditions including primary nocturnal enuresis, nocturia, and diabetes insipidus. Desmopressin works by limiting the amount of water that is eliminated in the urine. Desmopressin binds to V2 receptors in renal coll…	Kaufmann JE, et al. Desmopressin (DDAVP) induces NO production in human endothelial cells via V2 receptor- and cAMP-mediated signaling. J Thromb Haemost. 2003 Apr;1(4):821-8.
T4S0647	Butylphthalide	3-Butylphthalide; 3-n-Butylphthalide; 3-n-Butylphathlide	6066-49-5	CCCCC1OC(=O)c2ccccc12	C12H14O2	190.24	NMPA		Nervous system	Others	Others	Others	Butylphthalide is an anti-cerebral-ischemia drug; first isolated from the seeds of Apium graveolens Linn.	Zhao W, et al. 3-N-butylphthalide improves neuronal morphology after chronic cerebral ischemia. Neural Regen Res. 2014 Apr 1;9(7):719-26.
T7045	Clonidine	Catapres; Kapvay; Nexiclon	4205-90-7	Clc1cccc(Cl)c1NC1=NCCN1	C9H9Cl2N3	230.09	FDA		Nervous system	GPCR/G Protein; Neuroscience	Adrenergic Receptor	Adrenergic Receptor; α2 adrenergic receptor	Clonidine is a centrally active alpha-adrenergic agonist used predominantly as an antihypertensive agent, usually in combination with other agents. Despite wide-scale use for many years, clonidine has not been linked definitively to either serum aminotransferase elevations or clinically apparent liver injury.	Bugajski J, et al. The involvement of central alpha-adrenergic and histamine H2-receptors in the hypothermia induced by clonidine in the rat. Neuropharmacology. 1980 Jan;19(1):9-15.
T5133	Dabigatran Etexilate Mesylate	Dabigatran etexilate methanesulfonate; BIBR 1048MS	872728-81-9	CS(O)(=O)=O.CCCCCCOC(=O)NC(=N)c1ccc(NCc2nc3cc(ccc3n2C)C(=O)N(CCC(=O)OCC)c2ccccn2)cc1	C34H41N7O5.CH4O3S	723.84	FDA		Cardiovascular system	Proteases/Proteasome	Thrombin	Thrombin	Dabigatran etexilate mesylate is the orally active prodrug of dabigatran. Dabigatran is a reversible and selective, direct thrombin inhibitor (DTI, Ki: 4.5 nM).	Wienen W, Stassen JM, Priepke H, In-vitro profile and ex-vivo anticoagulant activity of the direct thrombin inhibitor dabigatran and its orally activeprodrug, dabigatran etexilate. Thromb Haemost. 2007 Jul;98(1):155-62.
T5135	Flupentixol dihydrochloride	Fupentixol Dihydrochloride; Flupenthixol dihydrochloride; Flupentixol dihydrochloride; (E/Z)-Flupentixol Dihydrochloride	2413-38-9	OCCN1CCN(CC1)CCC=C2c3c(Sc4c2cc(C(F)(F)F)cc4)cccc3.Cl.Cl	C23H27Cl2F3N2OS	507.43	NMPA		Nervous system	GPCR/G Protein; Neuroscience	Dopamine Receptor	D1; D2	Flupentixol is used in therapy of schizophrenia as well as in anxiolytic and depressive disorders.	Yonar D, et al. Effect of cis-(Z)-flupentixol on DPPC membranes in the presence and absence of cholesterol. Chem Phys Lipids. 2016 Jun;198:61-71.
T5109	Avapritinib	BLU-285	1703793-34-3	Cn1cc(cn1)-c1cc2c(ncnn2c1)N1CCN(CC1)c1ncc(cn1)[C@@](C)(N)c1ccc(F)cc1	C26H27FN10	498.56	FDA		Cancer	Angiogenesis; Tyrosine Kinase/Adaptors	c-Kit; PDGFR; PDGFR	c-Kit; PDGFR; PDGFRα	Avapritinib is a dual inhibitor of the mutant KIT receptor (KIT D816V, IC50: 0.27 nM) and PDGFRα (PDGFRα D842V, IC50: 0.24 nM).	Erica Evans, et al. Blu-285, a Potent and Selective Inhibitor for Hematologic Malignancies with KIT Exon 17 Mutations.Blood 2015 126:568.
T5002	Methyl Aminolevulinate Hydrochloride	Aminolevulinic acid methyl ester Hydrochloride; Methyl 5-aminolevulinate Hydrochloride; 5-Aminolevulinic acid methyl ester; Methyl δ-aminolevulinate hydrochloride	79416-27-6	Cl.COC(=O)CCC(=O)CN	C6H12ClNO3	181.62	FDA		Cancer	Others	Others	Others	Methyl Aminolevulinate Hydrochloride is commonly used in photosentizer reagents for photodynamic therapy to treat conditions such as Acne vulgaris and hypertrophic scarring.	Morrow DI, et al. Hexyl aminolaevulinate is a more effective topical photosensitiser precursor than methyl aminolaevulinate and 5-aminolaevulinic acids when applied in equimolar doses. J Pharm Sci. 2010 Aug;99(8):3486-98.
T4983	Isoetharine mesylate salt	Isoetarine mesilate	7279-75-6	CS(O)(=O)=O.CCC(NC(C)C)C(O)c1ccc(O)c(O)c1	C14H25NO6S	335.42	FDA		Others	GPCR/G Protein; Neuroscience	Adrenergic Receptor	PXR; β-adrenergic receptor	Isoetharine Mesylate Salt is a β-adrenergic receptor agonist. it also is pregnane X receptor (PXR) activator capable of upregulating CYP450 expression.	Ratajewski M, et al. Screening of a chemical library reveals novel PXR-activating pharmacologic compounds. Toxicol Lett. 2015 Jan 5;232(1):193-202.
T5051	Isopropamide Iodide		71-81-8	[I-].CC(C)[N+](C)(CCC(C(N)=O)(c1ccccc1)c1ccccc1)C(C)C	C23H33IN2O	480.43	FDA		Others	Neuroscience	AChR	muscarinic receptor	Isopropamide iodide is a long-acting anticholinergic drug. It is used in the treatment of peptic ulcers and other gastrointestinal disorders. It also acts as a muscarinic receptor antagonist which can be applied to the treatment of diseases affecting cognition including Alzheimer’s disease.	Fisher A, et al. AF150(S) and AF267B: M1 muscarinic agonists as innovative therapies for Alzheimer's disease. J Mol Neurosci. 2002 Aug-Oct;19(1-2):145-53.
T5022	Ceforanide		60925-61-3	NCc1ccccc1CC(=O)N[C@H]1[C@H]2SCC(CSc3nnnn3CC(O)=O)=C(N2C1=O)C(O)=O	C20H21N7O6S2	519.55	FDA		Immune system	Microbiology/virology	Antibacterial; Antibiotic	Antibiotic; Bacterial; PBPs	Ceforanide is a second-generation cephalosporin antibiotic with bactericidal activity. Ceforanide causes inhibition of bacterial cell wall synthesis by inactivating penicillin binding proteins (PBPs) thereby interfering with the final transpeptidation step required for cross-linking of peptidoglycan units which are a component of the cell wall.	Sifakis S, et al. Chemoprophylactic and bactericidal efficacy of 80 mg gentamicin in a single and once-daily dosing. Arch Gynecol Obstet. 2005 Sep;272(3):201-6.
T5037	Midecamycin	Antibiotic SF-837; Espinomycin A; Medecamycin A1; Platenomycin B1; Rubimycin; Turimycin P3	35457-80-8	CCC(=O)O[C@H]1[C@H](C)O[C@H](C[C@@]1(C)O)O[C@@H]1[C@@H](C)O[C@@H](O[C@H]2[C@@H](CC=O)C[C@@H](C)[C@@H](O)\C=C\C=C\C[C@@H](C)OC(=O)C[C@@H](OC(=O)CC)[C@@H]2OC)[C@H](O)[C@H]1N(C)C	C41H67NO15	813.97	NMPA,France	JP17	Immune system;Infection	Microbiology/virology	Antibacterial; Antibiotic	Antibacterial; Antibiotic; Bacterial	Midecamycin, an acetoxy-substituted macrolide antibiotic, has effective on gram-positive and gram-negative bacteria acts by inhibiting bacterial protein synthesis.	Neu HC. In vitro activity of midecamycin, a new macrolide antibiotic. Antimicrob Agents Chemother. 1983 Sep;24(3):443-4.
T5077	Deoxycholic acid sodium salt	Sodium Desoxycholate; Deoxycholic acid sodium salt; Sodium deoxycholate	302-95-4	[Na+].C[C@H](CCC([O-])=O)[C@H]1CC[C@H]2[C@@H]3CC[C@@H]4C[C@H](O)CC[C@]4(C)[C@H]3C[C@H](O)[C@]12C	C24H39NaO4	414.56	FDA		Metabolism	GPCR/G Protein; Metabolism	Endogenous Metabolite; GPCR19	Endogenous Metabolite; GPCR19; TGR5	Sodium Desoxycholate can activate the G protein-coupled bile acid receptor TGR5 that stimulates brown adipose tissue (BAT) thermogenic activity.	Somm E, et al. β-Klotho deficiency protects against obesity through a crosstalk between liver, microbiota, and brown adipose tissue. JCI Insight. 2017 Apr 20;2(8). pii: 91809.
T4982	Benznidazol	Benznidazole; Ro 71051; Benznidazol; Ro 07-1051; Radanil	22994-85-0	[O-][N+](=O)c1nccn1CC(=O)NCc1ccccc1	C12H12N4O3	260.25	FDA	Ph.Int_6th	Immune system	Microbiology/virology	Antibiotic; Parasite	antiprotozoal; Parasite	Benznidazole has an antiprotozoal activity by interfering with parasite protein biosynthesis, influencing cytokines production and stimulating host phagocytosis.	Calvo KL, et al. Benznidazole modulates cell proliferation in acute leukemia cells. Immunopharmacol Immunotoxicol. 2013 Aug;35(4):478-86.
T4987	NSC 42196	Calcium α-D-heptagluconate hydrate; Calcium glucoheptonate	17140-60-2	[Ca++].OC[C@@H](O)[C@@H](O)[C@H](O)[C@@H](O)[C@@H](O)C([O-])=O.OC[C@@H](O)[C@@H](O)[C@H](O)[C@@H](O)[C@@H](O)C([O-])=O	C14H26CaO16	490.42	FDA		Others	Metabolism	Endogenous Metabolite	Endogenous Metabolite	Calcium glucoheptonate is the calcium salt of (2xi)-D-gluco-heptonic acid. It is used as a calcium supplement for treatment of hypocalcemia.
T4979	Procyclidine hydrochloride	(±)-Procyclidine hydrochlorid	1508-76-5	Cl.OC(CCN1CCCC1)(C1CCCCC1)c1ccccc1	C19H30ClNO	323.9	FDA		Nervous system	Membrane Transporter/Ion Channel; Neuroscience	iGluR; NMDAR	iGluR; NMDA receptor	Procyclidine is a potent anticholinergic agent and also have NMDA antagonist properties.	Jevtovic-Todorovic V, et al. Anti-parkinsonian agents procyclidine and ethopropazine alleviate thermal hyperalgesia in neuropathic rats. Neuropharmacology. 2003 May;44(6):739-48.
T4985	Neticonazole Hydrochloride		130773-02-3	Cl.CCCCCOc1ccccc1\C(=C/SC)n1ccnc1	C17H22N2OS.HCl	338.9	PMDA		Cancer	Microbiology/virology	Antifungal	Antifungal; Fungal	Neticonazole Hydrochloride is an imidazole antifungal for the treatment of fungal skin infections. Neticonazole is reported as a potent exosome inhibitor which can block the activity of exosomes.	Datta A, et al. High-throughput screening identified selective inhibitors of exosome biogenesis and secretion: A drug repurposing strategy for advanced cancer. Sci Rep. 2018 May 25;8(1):8161.
T5059	L-Tartaric acid	L(+)-Tartaric acid; (2R,3R)-(+)-Tartaric acid	87-69-4	O[C@H]([C@@H](O)C(O)=O)C(O)=O	C4H6O6	150.09	Other countries	USP42-NF37,JP17	Digestive system	Metabolism; oxidation-reduction	Antioxidant; Endogenous Metabolite	Antioxidant; Endogenous Metabolite	Tartaric acid occurs naturally in many plants, particularly grapes and tamarinds, and is one of the main acids found in wine. It is used as an antioxidant. Salts of tartaric acid are known as tartrates. Tartaric acid is a muscle toxin, which works by inhibiting the production of malic acid, and in high doses causes paralysis and death.	Regueiro J, et al. Urinary tartaric acid as a potential biomarker for the dietary assessment of moderate wine consumption: a randomised controlled trial. Br J Nutr. 2014 May;111(9):1680-5.
T5067	Flavin adenine dinucleotide disodium salt	Flavin Adenine Dinucleotide Disodium; FAD sodium salt; FAD-Na2	84366-81-4	O[C@H]([C@@H]1O)[C@H](N2C3=NC=NC(N)=C3N=C2)O[C@@H]1COP(OP(OC[C@@H](O)[C@@H](O)[C@@H](O)CN4C(C(C(N5)=O)=NC6=CC(C)=C(C)C=C64)=NC5=O)(O)=O)(O)=O.[Na].[Na]	C27H33N9Na2O15P2	831.54	PMDA	JP17	Metabolism	Metabolism	Endogenous Metabolite	Endogenous Metabolite	FAD is a flavin dinucleotide that is synthesized when the AMP moiety from ATP is transferred onto riboflavin 5'-monophosphate. FAD functions as a coenzyme that facilitates the transfer of electrons by flavoenzymes in oxidation-reduction reactions in cells.	Karyakin AA, et al. Electropolymerized flavin adenine dinucleotide as an advanced NADH transducer. Anal Chem. 2004 Apr 1;76(7):2004-9.
T4995	Cefpirome sulfate	HR-810 sulfate	98753-19-6	OS([O-])(=O)=O.CO\N=C(/C(=O)N[C@H]1[C@H]2SCC(C[n+]3cccc4CCCc34)=C(N2C1=O)C(O)=O)c1csc(N)n1	C22H24N6O9S3	612.66	FDA		Immune system;Infection	Microbiology/virology	Antibacterial; Antibiotic	Antibiotic; Bacterial	Cefpirome Sulfate is a fourth generation cephalosporin antibiotic.	Matsuda K, et al. Antimicrob Agents ChemOthers. 1995 Dec;39(12):2631-4.
T5013	Brequinar	NSC 368390; DUP785; Bipenquinate	96187-53-0	Cc1c(nc2ccc(F)cc2c1C(O)=O)-c1ccc(cc1)-c1ccccc1F	C22H13F2NO2	375.37		Martindale the Extra Pharmacopoei		Cell Cycle/Checkpoint; DNA Damage/DNA Repair; Metabolism; Microbiology/virology	Dehydrogenase; DNA/RNA Synthesis; Virus Protease	dihydroorotate dehydrogenase; DNA/RNA Synthesis; Virus Protease	Brequinar is a potent inhibitor of dihydroorotate dehydrogenase, with potent activities against a broad spectrum of viruses.	Qing M, et al. Characterization of dengue virus resistance to brequinar in cell culture. Antimicrob Agents Chemother. 2010 Sep;54(9):3686-95.
T5024	Cefotiam Hexetil Hydrochloride		95789-30-3	Cl.Cl.CC(OC(=O)OC1CCCCC1)OC(=O)C1=C(CSc2nnnn2CCN(C)C)CS[C@@H]2[C@H](NC(=O)Cc3csc(N)n3)C(=O)N12	C27H37N9O7S3.2ClH	768.77	FDA		Immune system;Infection	Microbiology/virology	Antibacterial; Antibiotic	Antibiotic; Bacterial; PBPs	Cefotiam Hydrochloride is the hydrochloride salt form of cefotiam, a third-generation, semi-synthetic, beta-lactam cephalosporin antibiotic with antibacterial activity. Cefotiam binds to penicillin-binding proteins (PBPs), transpeptidases that are responsible for crosslinking of peptidoglycan. By preventing crosslinking of peptidoglycan, cell wall integrity is lost and cell wall synthesis is halt…	Matsuda K, et al. Antimicrob Agents ChemOthers. 1995 Dec;39(12):2631-4.
T5039	Aminohippurate sodium	Sodium 4-aminohippurate Hydrate; p-Aminohippuric acid sodium salt; Aminohippurate sodium; Sodium p-aminohippurate	94-16-6	[Na+].Nc1ccc(cc1)C(=O)NCC([O-])=O	C9H9N2NaO3	216.17	PMDA		Others	Others	Others	Others	The glycine amide of 4-aminobenzoic acid. Its sodium salt is used as a diagnostic aid to measure effective renal plasma flow (ERPF) and excretory capacity.	Naidoo V, et al. Diclofenac toxicity in Gyps vulture is associated with decreased uric acid excretion and not renal portal vasoconstriction. Comp Biochem Physiol C Toxicol Pharmacol. 2009 Apr;149(3):269-74.
T4997	Umeclidinium bromide	GSK573719A	869113-09-7	[Br-].OC(c1ccccc1)(c1ccccc1)C12CC[N+](CCOCc3ccccc3)(CC1)CC2	C29H34BrNO2	508.49	FDA		Nervous system	Neuroscience	AChR	M1 mAChR; M2 mAChR; M3 mAChR; M4 mAChR; M5 mAChR; mAChR	Umeclidinium bromide is a novel mAChR antagonist.	Cazzola M, et al. Pharmacology and therapeutics of bronchodilators. Pharmacol Rev. 2012 Jul;64(3):450-504.
T4959	DL-Mannitol	Mannitol	87-78-5	OC[C@@H](O)[C@@H](O)[C@H](O)[C@H](O)CO	C6H14O6	182.17	FDA		Others	Others	Others	Others	Mannitol is a osmotic diuretic, it may play a role in reducing off-target 68Ga-PSMA renal uptake	Mendelow AD, et al. Effect of mannitol on cerebral blood flow and cerebral perfusion pressure in human head injury. J Neurosurg. 1985 Jul;63(1):43-8.
T4998	Cefpodoxime proxetil		87239-81-4	COCC1=C(N2[C@H](SC1)[C@H](NC(=O)C(=N/OC)\c1csc(N)n1)C2=O)C(=O)OC(C)OC(=O)OC(C)C	C21H27N5O9S2	557.6	FDA		Immune system;Infection	Microbiology/virology	Antibacterial; Antibiotic	Antibiotic; Bacterial	Cefpodoxime is an oral third generation cephalosporin antibiotic. It is active against most Gram positive and Gram negative bacteria. It is commonly used to treat acute otitis media, pharyngitis, and sinusitis. Cefpodoxime proxetil is a prodrug which is absorbed and de-esterified by the intestinal mucosa to Cefpodoxime.	KUMAR, Yatendra, TEWARI, et al. PROCESS FOR THE PREPARATION OF CEFPODOXIME ACID[J]. 2004.
T4911	α-Arbutin	alpha-Arbutin; alpha-Arbutoside; 4-hydroxyphenyl-D-lucopyranoside	84380-01-8	OC[C@H]1O[C@H](Oc2ccc(O)cc2)[C@H](O)[C@@H](O)[C@@H]1O	C12H16O7	272.25		Martindale:The Extra Pharmacopoeia		Proteases/Proteasome	Tyrosinase	Tyrosinase	Alpha-arbutin is a synthetic and functional active ingredient for skin lightening.	Magnusson, B., et al.: J. Invest. Dermatol., 52, 268 (1969)
T5030	Zofenopril calcium	Zofenopril (calcium); SQ26991; Zofenopril calcium	81938-43-4	[Ca++].C[C@H](CSC(=O)c1ccccc1)C(=O)N1C[C@H](C[C@H]1C([O-])=O)Sc1ccccc1.C[C@H](CSC(=O)c1ccccc1)C(=O)N1C[C@H](C[C@H]1C([O-])=O)Sc1ccccc1	C44H44CaN2O8S4	897.17	EMA		Cardiovascular system;Metabolism	Endocrinology/Hormones; Immunology/Inflammation; Metabolism; NF-κB	RAAS; Reactive Oxygen Species	ACE; Reactive Oxygen Species	Zofenopril Calcium(SQ26991) is an antioxidant that acts as an angiotensin-converting enzyme inhibitor. ACE Zofenopril is a pro-drug designed to undergo metabolic hydrolysis yielding the active free sulfhydryl compound zofenoprilat, which is an angiotensin converting enzyme (ACE) inhibitor . Zofenopril promotes the regeneration of peripheral nerve injuries in rat models . Zofenopril increases SR c…	Kalender, A.M., et al., Effect of Zofenopril on regeneration of sciatic nerve crush injury in a rat model. J Brachial Plex Peripher Nerve Inj, 2009. 4: p. 6.
T4989	Fosfomycin Tromethamine		78964-85-9	C[C@@H]1O[C@@H]1P(O)(O)=O.NC(CO)(CO)CO	C7H18NO7P	259.19	FDA		Immune system;Infection	Microbiology/virology	Antibacterial; Antibiotic	antibiotic; Bacterial	An antibiotic produced by Streptomyces fradiae.	Keating, G. et al.: Drugs, 73, 1951 (2013); Demir, T. et al.: Int. J. Infect. Dis., 17, e966 (2013)
T5008	Teprenone	Geranylgeranylacetone; Tetraprenylacetone	6809-52-5	CC(=O)CC\C=C(/C)CC\C=C(/C)CC\C=C(/C)CC\C=C(\C)C	C46H76O2	661.09	NMPA		Inflammation	Cytoskeletal Signaling; Metabolism	HSP	HSP	Teprenone is a anti-ulcer drug, and works as an inducer of heat shock proteins (HSPs).	Caprioli J, et al. Retinal ganglion cell protection with geranylgeranylacetone, a heat shock protein inducer, in a rat glaucoma model. Trans Am Ophthalmol Soc. 2003;101:39-50; discussion 50-1.
T5001	Nintedanib esylate	Nintedanib Ethanesulfonate Salt; BIBF 1120 (esylate); Nintedanib esylate; Intedanib; BIBF 1120	656247-18-6	CCS(O)(=O)=O.COC(=O)c1ccc2c(NC(=O)\C2=C(/Nc2ccc(cc2)N(C)C(=O)CN2CCN(C)CC2)c2ccccc2)c1	C31H33N5O4.C2H6O3S	649.76	FDA		Cancer	Angiogenesis; Tyrosine Kinase/Adaptors	FGFR; PDGFR; VEGFR	FGFR; FGFR1; FGFR2; FGFR3; PDGFR; PDGFRα; PDGFRβ; VEGFR; VEGFR1; VEGFR2; VEGFR3	BIBF 1120 esylate is a potent triple angiokinase inhibitor for VEGFR1/2/3, FGFR1/2/3 and PDGFRα/β	Roth GJ, et al. Design, synthesis, and evaluation of indolinones as triple angiokinase inhibitors and the discovery of a highly specific 6-methoxycarbonyl-substituted indolinone (BIBF 1120). J Med Chem, 2009, 52(14), 4466-4480.
T4977	Sofalcone	SU-88	64506-49-6	C\C(C)=C\COc1ccc(\C=C\C(=O)c2ccc(OC\C=C(\C)C)cc2OCC(O)=O)cc1	C27H30O6	450.52	PMDA		Inflammation;Digestive system	Autophagy; Microbiology/virology	Antibacterial; Autophagy	(HO)-1; Autophagy; Bacterial	Sofalcone, a gastric antiulcer agent in clinical use, is known to induce the expression of Heme oxygenase-1 (HO-1) in gastric epithelium.	Onda K, et al. Sofalcone upregulates the nuclear factor (erythroid-derived 2)-like 2/heme oxygenase-1 pathway, reduces soluble fms-like tyrosine kinase-1, and quenches endothelial dysfunction: potential therapeutic for preeclampsia. Hypertension. 2015 Apr;65(4):855-62.
T5000	Diflucortolone valerate	Afusona; Diflucortolone 21-valerate	59198-70-8	CCCCC(=O)OCC(=O)[C@H]1[C@H](C)C[C@H]2[C@@H]3C[C@H](F)C4=CC(=O)C=C[C@]4(C)[C@@]3(F)[C@@H](O)C[C@]12C	C27H36F2O5	478.57	PMDA		Cardiovascular system	Microbiology/virology	Antibacterial; Antifungal	Bacterial; Fungal	Diflucortolone valerate is a corticosteroid esterified with valeric acid. It helps to reduce itching, redness, and swelling.	Kieslich, et al.: Arzneim.-Forsch., 26, 1462 (1976)
T5005	Eperisone hydrochloride		56839-43-1	Cl.CCc1ccc(cc1)C(=O)C(C)CN1CCCCC1	C17H26ClNO	295.85	NMPA,PMDA	JP17	Nervous system;Inflammation	Others	Others	Others	Eperisone is a skeletal muscle relaxant and a spasmolytic agent related structurally to Tolperisone.	Mihara K, et al. Intestinal first-pass metabolism of eperisone in the rat. Pharm Res. 2001 Aug;18(8):1131-7.
T5017	Nimustine Hydrochloride	Nidran hydrochloride	55661-38-6	Cl.Cc1ncc(CNC(=O)N(CCCl)N=O)c(N)n1	C9H14Cl2N6O2	309.15	PMDA		Cancer	Apoptosis; Cell Cycle/Checkpoint; DNA Damage/DNA Repair	Apoptosis; DNA Alkylator/Crosslinker; DNA/RNA Synthesis	Apoptosis; DNA Alkylator/Crosslinker; DNA/RNA Synthesis	Nimustine has been used in trials studying the treatment of Glioblastoma.	Matsumoto, T. et al.: J. Eur. Acad. Dermatol. Venereol., 27, 1514 (2013)
T4993	Afloqualone	HQ-495	56287-74-2	Cc1ccccc1-n1c(CF)nc2ccc(N)cc2c1=O	C16H14FN3O	283.3	FDA,PMDA	JP17	Others	Membrane transporter/Ion channel; Neuroscience	GABA Receptor	GABA Receptor; GABAR	Afloqualone is a agonist of GABA receptor . Target: GABA Receptor in vitro: Afloqualone is a quinazolinone family GABAergic drug. Afloqualone is an analogue of methaqualone. It has sedative and muscle-relaxant effects, resulting from its agonist activity at the β subtype of the GABAa receptor.	Yamamura M, et al. Effects of afloqualone, a new centrally acting muscle relaxant, on DRL response and CER in rats (author's transl). Nihon Yakurigaku Zasshi. 1981 Oct;78(4):381-92.
T5009	Trimethobenzamide hydrochloride	Ro 2-9578; Tribenzagan Hydrochloride	554-92-7	Cl.COc1cc(cc(OC)c1OC)C(=O)NCc1ccc(OCCN(C)C)cc1	C21H29ClN2O5	424.92	FDA	USP42-NF37	Others	GPCR/G Protein; Neuroscience; Microbiology/virology	Dopamine Receptor; Influenza Virus	D2; Dopamine; Influenza Virus	Trimethobenzamide hydrochloride is a blocker of the D2 receptor. Trimethobenzamide is an antiemetic used to prevent nausea and vomiting.	Smith HS, et al. Dopamine receptor antagonists. Ann Palliat Med. 2012 Jul;1(2):137-42.
T5023	Propiverine hydrochloride		54556-98-8	Cl.CCCOC(C(=O)OC1CCN(C)CC1)(c1ccccc1)c1ccccc1	C23H30ClNO3	403.94	PMDA		Nervous system	Membrane transporter/Ion channel; Metabolism; Neuroscience	AChR; Calcium Channel	Calcium Channel; mAChR	Propiverine is a widely used antimuscarinic drug with a mixed mode of action in the treatment of symptoms associated with overactive bladder (OAB).	Ito Y, et al. Low Urin Tract Symptoms. 2010, 2(1):43-9.
T5040	Medroxyprogesterone		520-85-4	C[C@H]1C[C@H]2[C@@H]3CC[C@](O)(C(C)=O)[C@@]3(C)CC[C@@H]2[C@@]2(C)CCC(=O)C=C12	C22H32O3	344.49	FDA		Endocrine system	Endocrinology/Hormones	Estrogen/progestogen Receptor; progesterone receptor	Estrogen/progestogen Receptor; Progesterone Receptor	Medroxyprogesterone is used in the treatment of renal carcinoma. It is a synthetic progestational hormone used in veterinary practice as an estrus regulator.	Okojie A K , Oyekunle O A . Depo-Provera effects on Wistar rat performance in the Y-maze.[J]. Metabolic Brain Disease, 2014, 29(2):529-31.
T5026	Oxytocin	Oxytocin (Syntocinon); Oxytocic hormone; Oxytocin; α-Hypophamine	50-56-6	CC[C@H](C)[C@@H]1NC(=O)[C@H](Cc2ccc(O)cc2)NC(=O)[C@@H](N)CSSC[C@H](NC(=O)[C@H](CC(N)=O)NC(=O)[C@H](CCC(N)=O)NC1=O)C(=O)N1CCC[C@H]1C(=O)N[C@@H](CC(C)C)C(=O)NCC(N)=O	C43H66N12O12S2	1007.19	FDA		Endocrine system	Endocrinology/Hormones; GPCR/G Protein	Oxytocin Receptor	Oxytocin Receptor	Oxytocin is a mammalian neurohypophysial hormone, a ligand of oxytocin receptor.	Oxytocin, From Wikipedia
T5010	Propyphenazone	Propyphenazone (4-Isopropylantipyrine); Isopropylphenazone; 4-Isopropylantipyrine; Propyphenazone; Isopropylantipyrine; Isopropyrine	479-92-5	CC(C)c1c(C)n(C)n(-c2ccccc2)c1=O	C14H18N2O	230.31	NMPA	JP17	Nervous system	Immunology/Inflammation; Neuroscience	COX	COX; COX-2	Propyphenazone is a pyrazolone derivative with anti-inflammatory, analgesic and antipyretic activity, Propyphenazone-based analogues as prodrugs and selective cyclooxygenase-2 inhibitors.	Radwan MF, et al. Propyphenazone-based analogues as prodrugs and selective cyclooxygenase-2 inhibitors. ACS Med Chem Lett. 2014 Jun 23;5(9):983-8.
T4992	Cefamandole nafate	Cephamandole nafate; Cefamandole formate sodium	42540-40-9	[Na+].Cn1nnnc1SCC1=C(N2[C@H](SC1)[C@H](NC(=O)[C@H](OC=O)c1ccccc1)C2=O)C([O-])=O	C19H17N6NaO6S2	512.49	FDA		Immune system;Infection	Microbiology/virology	Antibacterial; Antibiotic	Antibiotic; Bacterial	Cefamandole nafate is a second-generation broad-spectrum cephalosporin antibiotic.	Taha, M., et al.: Bioorg. Med. Chem., 16, 1218 (2008)
T4988	Boceprevir	SCH 503034; EBP 520	394730-60-0	CC(C)(C)NC(=O)N[C@H](C(=O)N1C[C@H]2[C@@H]([C@H]1C(=O)NC(CC1CCC1)C(=O)C(N)=O)C2(C)C)C(C)(C)C	C27H45N5O5	519.68	FDA		Immune system	Microbiology/virology; Proteases/Proteasome	HCV Protease; SARS-CoV	HCV; HCV NS3 protease; SARS-CoV	Boceprevir is a novel, potent, highly selective, orally bioavailable HCV NS3 protease inhibitor with Ki of 14 nM in both enzyme assay and EC90 of 350 nM in cell-based replicon assay.	Yao M, et al. Conditional Inducible Triple-Transgenic Mouse Model for Rapid Real-Time Detection of HCV NS3/4A ProteaseActivity. PLoS One. 2016 Mar 4;11(3):e20150894.
T5014	Prostaglandin E2	Prostaglandin E2 (PGE2); Dinoprostone; Prostaglandin E2; PGE2	363-24-6	CCCCC[C@H](O)\C=C\[C@H]1[C@H](O)CC(=O)[C@@H]1C\C=C/CCCC(O)=O	C20H32O5	352.47	FDA		Others	GPCR/G Protein; Immunology/Inflammation; Metabolism	Endogenous Metabolite; Prostaglandin Receptor	Endogenous Metabolite; EP2; Human Endogenous Metabolite; Prostaglandin Receptor	Prostaglandin E2 is a hormone-like substance that participate in a wide range of body functions such as the contraction and relaxation of smooth muscle, the dilation and constriction of blood vessels, control of blood pressure, and modulation of inflammation.	Fernandez-Repollet E, et al. In vivo effects of prostaglandin E2 and arachidonic acid on phagocytosis of fluorescent methacrylate microbeads by rat peritoneal macrophages. J Histochem Cytochem. 1982 May;30(5):466-70.
T5027	Dimemorfan phosphate	3,17-dimethylmorphinan	36304-84-4	OP(O)(O)=O.CN1CC[C@@]23CCCC[C@@H]2[C@@H]1Cc1ccc(C)cc31	C18H25N.H3O4P	353.4	PMDA	JP17	Others	GPCR/G Protein	Sigma receptor	Sigma Receptor; σ1	Dimemorfan phosphate is a sigma 1 receptor agonist, used as a potent antitussive.	Wang YH, et al. Anti-inflammatory effects of dimemorfan on inflammatory cells and LPS-induced endotoxin shock in mice. Br J Pharmacol. 2008 Jul;154(6):1327-38.
T5038	Cephapirin Sodium		24356-60-3	[Na+].CC(=O)OCC1=C(N2[C@H](SC1)[C@H](NC(=O)CSc1ccncc1)C2=O)C([O-])=O	C17H16N3O6S2.Na	445.45	FDA	USP42-NF37	Immune system	Microbiology/virology	Antibacterial; Antibiotic	Antibacterial; Antibiotic; Bacterial	Cefapirin sodium is the sodium salt of Cephapirin, an antimicrobial agent.	Tan JS, et al. Bacampicillin, Ampicillin, Cephalothin, and Cephapirin levels in human blood and interstitial fluid. Antimicrob Agents Chemother. 1979 Apr;15(4):510-2.
T5007	Benproperine phosphate	Blascorid; Pirexyl phosphate	19428-14-9	OP(O)(O)=O.CC(COc1ccccc1Cc1ccccc1)N1CCCCC1	C21H30NO5P	407.44	NMPA		Respiratory system	Cytoskeletal Signaling	Microtubule Associated	Arp2/3 Complex	Benproperine phosphate is a cough suppressant.	Feng, S., Liu, J., Han, X., & Fan, J. (2019). Resonance light scattering study on the interaction of benproperine phosphate with eriochrome blue black R in the presence of sodium dodecylbenzene sulphonate and its analytical application. Luminescence, 24(2), 67-72.
T5006	Flucloxacillin sodium	floxacillin sodium	1847-24-1	[Na+].Cc1onc(c1C(=O)N[C@H]1[C@H]2SC(C)(C)[C@@H](N2C1=O)C([O-])=O)-c1c(F)cccc1Cl	C19H16ClFN3NaO5S	475.85	EMA		Immune system;Infection	Microbiology/virology	Antibacterial; Antibiotic	Antibiotic; Bacterial	Flucloxacillin sodium is a highly active antibiotic against Gram-positive and Gram-negative bacteria.	Williams J, et al.Sweat tests and flucloxacillin. Arch Dis Child. 1988 Jul;63(7):847-8.
T4986	Imidafenacin	ONO-8025; KRP-197	170105-16-5	Cc1nccn1CCC(C(N)=O)(c1ccccc1)c1ccccc1	C20H21N3O	319.4	PMDA		Urinary system	Neuroscience	AChR	mAChR	Imidafenacin(KRP-197; ONO-8025) is a potent and selective inhibitor of M3 receptors with Kb of 0.317 nM.	Yamazaki T, et al. Imidafenacin has no influence on learning in nucleus basalis of Meynert-lesioned rats. Naunyn Schmiedebergs Arch Pharmacol. 2013 Dec;386(12):1095-102.
[truncated: 2,531 more rows]
